# Supplementary material for: Development and biophysical characterization of a humanized FSH–blocking monoclonal antibody therapeutic formulated at an ultra-high concentration
Source: eLife. 2023 Jun 19;12:e88898. doi: 10.7554/eLife.88898 (PMC10325703; doi:10.7554/eLife.88898)
Supplement: Figure 1—source data 1. [file elife-88898-fig1-data1.xlsx]

## Sheet: Figure 1A
Figure 1A: Protein concentration optimization by Protein Thermal Shift Assay
MS-Hu6 in PBS (1 mg/mL)		Formulation (0.2 mg/mL)		Formulation (1 mg/mL)		Formulation (10 mg/mL)		Formulation (20 mg/mL)		Formulation (50 mg/mL)		Formulation (100 mg/mL)
Temp (°C)	dF/dT	Temp (°C)	dF/dT	Temp (°C)	dF/dT	Temp (°C)	dF/dT	Temp (°C)	dF/dT	Temp (°C)	dF/dT	Temp (°C)	dF/dT
28.3805	-12390.2	28.3753	-174.066	28.3795	-152.884	28.3746	-525.64	28.3761	-876.033	28.3753	-10230.2	28.3795	4565.44
28.6801	-12538.9	28.6752	-168.711	28.6796	-157.448	28.6748	-527.404	28.676	-868.005	28.6755	-10129.3	28.6796	1908.98
28.98	-12643.2	28.975	-163.717	28.9799	-162.945	28.9755	-530.137	28.9761	-860.513	28.9758	-9988.81	28.9799	-471.416
29.2802	-12748.4	29.275	-158.885	29.28	-168.39	29.2763	-532.672	29.2762	-857.571	29.2763	-9896.56	29.28	-2648.69
29.5805	-12915.9	29.5749	-156.298	29.5798	-177.062	29.577	-533.778	29.576	-860.524	29.5765	-9919.76	29.5798	-4080.04
29.8807	-13023.7	29.8745	-155.692	29.8795	-185.726	29.8776	-536.097	29.8758	-857.293	29.8766	-9838.62	29.8795	-5056.25
30.1808	-13152.5	30.1741	-155.288	30.1791	-191.981	30.178	-541.923	30.1755	-852.435	30.1767	-9878.43	30.1791	-5052.21
30.4808	-13424.2	30.4735	-156.267	30.4783	-197.094	30.4783	-546.512	30.4749	-847.287	30.4768	-9789.13	30.4783	-5202.83
30.7807	-13398.5	30.7726	-153.6	30.7773	-204.617	30.7787	-545.636	30.7743	-839.562	30.7769	-9774.85	30.7773	-5176.84
31.0804	-13591.6	31.0716	-154.267	31.076	-209.721	31.079	-549.953	31.0736	-835.604	31.0772	-9733.26	31.076	-5187.25
31.3797	-13552.6	31.3704	-153.805	31.3746	-217.175	31.3791	-554.784	31.373	-834.243	31.3775	-9710.7	31.3746	-5661.91
31.6788	-13581.1	31.6688	-154.927	31.6728	-222.376	31.6787	-559.827	31.6719	-834.787	31.6774	-9599.48	31.6728	-5851.9
31.9777	-13816.7	31.9671	-159.853	31.9707	-227.841	31.9775	-560.308	31.9705	-838.321	31.9769	-9500.1	31.9707	-5991.99
32.2761	-13950.3	32.2655	-167.476	32.2687	-234.479	32.276	-559.931	32.2691	-833.764	32.2765	-9447.95	32.2687	-5944.82
32.5739	-14120.8	32.5638	-171.242	32.5667	-238.429	32.5744	-567.02	32.5677	-828.514	32.576	-9321.96	32.5667	-5976.61
32.8718	-14201.6	32.8622	-173.148	32.8647	-242.303	32.8727	-571.991	32.8661	-829.258	32.8753	-9268.21	32.8647	-5926.73
33.1701	-14330.9	33.1606	-174.737	33.1628	-245.797	33.171	-571.492	33.1647	-830.354	33.1743	-9106.83	33.1628	-5994.04
33.4686	-14413	33.4596	-176.874	33.4616	-246.894	33.4698	-569.6	33.4638	-825.338	33.4737	-9096.14	33.4616	-5894.56
33.7674	-14662.3	33.7597	-181.707	33.7615	-247.379	33.769	-572.835	33.764	-821.051	33.7736	-9018.46	33.7615	-5611.25
34.0665	-14728.5	34.0605	-184.613	34.0621	-251.314	34.0685	-573.465	34.0647	-818.77	34.0734	-8963.03	34.0621	-5435.36
34.3662	-14948.4	34.3617	-188.85	34.3631	-251.474	34.3685	-574.276	34.3656	-811.003	34.3732	-8840.32	34.3631	-5222.06
34.6665	-15154.4	34.6636	-190.625	34.665	-251.654	34.6694	-571.857	34.6674	-808.737	34.6739	-8806.1	34.665	-5113.94
34.9664	-15182.7	34.966	-193.958	34.9672	-253.936	34.971	-578.174	34.9696	-807.504	34.9751	-8761.46	34.9672	-4982.65
35.2662	-15308.6	35.2683	-190.657	35.2695	-255.35	35.2727	-581.053	35.2718	-806.135	35.2763	-8675.64	35.2695	-4857.62
35.5667	-15310	35.5709	-190.457	35.572	-255.626	35.5748	-576.751	35.5743	-806.407	35.578	-8628.18	35.572	-4806.26
35.8674	-15478.9	35.8737	-191.505	35.8747	-255.973	35.8773	-572.948	35.8771	-801.45	35.88	-8554.74	35.8747	-4772.47
36.1681	-15479.4	36.1767	-192.956	36.1774	-257.175	36.1799	-572.778	36.1801	-797.926	36.1822	-8637.41	36.1774	-4705.5
36.4689	-15491.3	36.4792	-194.509	36.4796	-260.113	36.4821	-574.801	36.4825	-798.806	36.4839	-8563.16	36.4796	-4659.09
36.7698	-15494.1	36.7811	-194.961	36.7811	-263.861	36.7838	-572.314	36.7842	-800.467	36.7852	-8456.1	36.7811	-4901.56
37.071	-15535.5	37.0825	-195.711	37.0822	-263.053	37.0853	-571.283	37.0856	-805.198	37.0865	-8322.25	37.0822	-5055.22
37.372	-15528.1	37.3837	-195.366	37.3831	-264.144	37.3864	-564.564	37.3866	-815.172	37.3876	-8329.87	37.3831	-5012.14
37.6726	-15473.4	37.6843	-197.645	37.6835	-266.751	37.6869	-561.097	37.6872	-816.533	37.6881	-8268.12	37.6835	-4934.59
37.9745	-15368.5	37.9851	-197.363	37.9839	-266.2	37.9875	-549.521	37.9878	-818.878	37.9886	-8251.1	37.9839	-4948.03
38.2776	-15213.1	38.2861	-200.491	38.2846	-263.682	38.2883	-541.05	38.2886	-828.968	38.2893	-8264.15	38.2846	-4933.33
38.5803	-15155.8	38.5869	-204.565	38.5851	-263.651	38.5889	-536.141	38.5892	-831.545	38.5898	-8251.11	38.5851	-4858.82
38.883	-14932.3	38.8874	-209.356	38.8854	-262.994	38.8891	-529.23	38.8894	-842.766	38.8899	-8210.81	38.8854	-4787.42
39.1854	-14872	39.1878	-213.422	39.1857	-261.221	39.1893	-520.77	39.1894	-853.777	39.19	-8029.52	39.1857	-4700.1
39.4876	-14799.6	39.4885	-216.935	39.4864	-258.931	39.4898	-507.925	39.4899	-863.042	39.4905	-7961.37	39.4864	-4720.67
39.7894	-14655.5	39.7895	-220.945	39.7874	-254.419	39.7908	-498.083	39.7907	-877.082	39.7915	-7971.19	39.7874	-4539.96
40.0906	-14517.4	40.0906	-223.024	40.0886	-254.564	40.0918	-487.734	40.0917	-885.817	40.0926	-7978.05	40.0886	-4434.61
40.3915	-14347.7	40.3917	-227.203	40.3898	-252.282	40.393	-482.042	40.3927	-889.065	40.3938	-7898.29	40.3898	-4406.85
40.6925	-14160	40.6929	-227.968	40.6911	-249.852	40.6943	-472.812	40.6938	-897.511	40.6951	-7813.37	40.6911	-4441.86
40.9927	-14083.4	40.994	-227.974	40.9923	-247.482	40.9954	-468.177	40.9947	-901.25	40.9963	-7756.07	40.9923	-4405.78
41.2923	-13990.9	41.2949	-231.275	41.2933	-249.213	41.2963	-463.646	41.2954	-901.442	41.2972	-7671.6	41.2933	-4412.98
41.5921	-13890.8	41.5954	-230.384	41.594	-249.506	41.5969	-457.441	41.5959	-906.769	41.5979	-7626.61	41.594	-4442.87
41.8919	-13846.7	41.8956	-229.016	41.8943	-251.144	41.8972	-451.781	41.8961	-908.625	41.8981	-7623.15	41.8943	-4460.03
42.1916	-13712.1	42.1951	-227.328	42.194	-253.484	42.1968	-447.841	42.1957	-902.591	42.1977	-7634.19	42.194	-4403.18
42.4915	-13553.7	42.4943	-223.989	42.4933	-255.937	42.4961	-445.814	42.4948	-895.342	42.4968	-7606.27	42.4933	-4320.28
42.7914	-13442.2	42.793	-220.123	42.7922	-258.939	42.7948	-443.207	42.7936	-885.708	42.7954	-7540.6	42.7922	-4229.66
43.0914	-13375.8	43.0913	-217.138	43.0907	-259.775	43.0932	-439.462	43.0919	-873.16	43.0936	-7533.49	43.0907	-4161.03
43.3918	-13315.7	43.3896	-212.697	43.389	-263.401	43.3914	-437.047	43.3903	-865.389	43.3917	-7479.07	43.389	-4115.95
43.6922	-13265.9	43.6878	-209.207	43.6872	-265.97	43.6895	-439.956	43.6885	-852.148	43.6896	-7488.74	43.6872	-4069.34
43.9924	-13174.4	43.9857	-206.547	43.9851	-271.055	43.9873	-439.083	43.9865	-840.718	43.9873	-7437	43.9851	-3989.41
44.2923	-13100	44.2838	-196.662	44.2831	-273.61	44.2854	-440.247	44.2847	-827.382	44.2854	-7353.65	44.2831	-3927.77
44.592	-12973.9	44.5824	-190.098	44.5816	-276.551	44.584	-443.133	44.5835	-814.65	44.584	-7269.69	44.5816	-3776.99
44.8916	-12845.2	44.882	-182.836	44.8811	-279.077	44.8835	-447.929	44.8832	-796.333	44.8835	-7189.97	44.8811	-3667.68
45.1914	-12724	45.1827	-177.399	45.1817	-281.74	45.1842	-452.451	45.184	-786.608	45.1843	-7129.75	45.1817	-3750.24
45.491	-12575.3	45.4835	-171.712	45.4824	-284.367	45.485	-460.827	45.485	-775.541	45.4852	-7119.13	45.4824	-3685.45
45.7907	-12412.6	45.7846	-164.795	45.7833	-288.357	45.7861	-467.447	45.7862	-761.404	45.7865	-7105.77	45.7833	-3749.6
46.0907	-12185.5	46.0862	-159.632	46.0848	-291.16	46.0877	-477.067	46.0879	-750.161	46.0883	-6995.43	46.0848	-3675.94
46.3906	-11978.7	46.3878	-154.653	46.3863	-291.969	46.3894	-485.722	46.3897	-737.721	46.3902	-6940.49	46.3863	-3598.55
46.6905	-11841	46.6893	-150.393	46.6878	-292.619	46.691	-490.905	46.6914	-729.489	46.692	-6885.76	46.6878	-3510.45
46.9904	-11690.8	46.9907	-145.111	46.9893	-290.978	46.9926	-497.857	46.993	-717.099	46.9937	-6831.53	46.9893	-3487.81
47.2906	-11528.8	47.2921	-144.354	47.2908	-286.987	47.294	-501.646	47.2945	-707.401	47.2953	-6818.16	47.2908	-3436.26
47.5911	-11384.1	47.5932	-142.546	47.5919	-283.608	47.5953	-506.921	47.5958	-696.871	47.5967	-6814.82	47.5919	-3502.26
47.8918	-11260.4	47.8935	-141.702	47.8923	-276.937	47.8957	-509.83	47.8961	-689.244	47.8971	-6753.59	47.8923	-3404.05
48.1924	-11134.7	48.1931	-137.532	48.192	-268.526	48.1954	-512.441	48.1958	-676.249	48.1968	-6730.4	48.192	-3183.36
48.4931	-11111.1	48.4929	-134.211	48.4918	-258.625	48.4952	-512.185	48.4956	-667.276	48.4966	-6632.11	48.4918	-3082.2
48.7939	-11097.4	48.7928	-134.474	48.7916	-246.715	48.7949	-512.29	48.7955	-659.627	48.7964	-6541.08	48.7916	-2936.79
49.0942	-11088.4	49.0924	-132.611	49.0912	-234.122	49.0945	-510.962	49.0951	-654.494	49.0959	-6550.88	49.0912	-2889.57
49.3943	-11123.5	49.3921	-130.023	49.3909	-221.445	49.3941	-508.818	49.3946	-645.161	49.3955	-6534.41	49.3909	-2818.86
49.6946	-11081.2	49.692	-127.983	49.6908	-208.618	49.6939	-505.326	49.6944	-636.01	49.6952	-6449.69	49.6908	-2766.26
49.995	-11027.1	49.9922	-126.853	49.9908	-196.065	49.9939	-502.823	49.9943	-630.793	49.9952	-6403.78	49.9908	-2673.07
50.2952	-11017.7	50.2921	-125.046	50.2906	-184.54	50.2936	-501.26	50.294	-624.353	50.2949	-6357.47	50.2906	-2605.79
50.5951	-10980.5	50.5922	-122.189	50.5905	-170.7	50.5934	-496.202	50.5938	-615.591	50.5947	-6250.15	50.5905	-2481.56
50.8947	-10945.4	50.8926	-118.478	50.8909	-159.499	50.8937	-491.878	50.894	-610.22	50.8951	-6189.19	50.8909	-2618.98
51.1944	-10962.3	51.1932	-117.233	51.1914	-148.823	51.1941	-487.793	51.1944	-607.277	51.1955	-6106.93	51.1914	-2754.72
51.494	-10895.3	51.4936	-116.783	51.4918	-139.86	51.4944	-481.208	51.4945	-602.642	51.4959	-6069.87	51.4918	-2892.63
51.7938	-10826.5	51.794	-113.301	51.7921	-129.75	51.7947	-476.944	51.7946	-597.913	51.7962	-6061.57	51.7921	-2992.96
52.0941	-10769.4	52.0943	-111.559	52.0924	-121.885	52.0949	-468.766	52.0947	-590.88	52.0964	-5955.54	52.0924	-3099.6
52.3945	-10643.5	52.3944	-109.494	52.3926	-115.931	52.3951	-458.115	52.3948	-585.039	52.3966	-5917.68	52.3926	-3233.47
52.6947	-10569.6	52.6945	-105.705	52.6925	-109.202	52.6951	-450.93	52.6948	-582.308	52.6966	-5914.06	52.6925	-3321.85
52.9948	-10522.3	52.9945	-101.811	52.9926	-102.365	52.9952	-442.154	52.9948	-576.171	52.9967	-5914.02	52.9926	-3426.86
53.2949	-10429.3	53.2948	-97.8187	53.2928	-95.8908	53.2955	-430.405	53.2951	-569.206	53.297	-5877.58	53.2928	-3484.19
53.5952	-10372	53.595	-95.1374	53.593	-91.6563	53.5958	-417.804	53.5954	-564.676	53.5973	-5909.79	53.593	-3581.65
53.8954	-10256.3	53.8948	-93.2566	53.8928	-86.4405	53.8956	-404.635	53.8952	-554.693	53.897	-5915.48	53.8928	-3571.67
54.1955	-10124.5	54.1945	-90.2994	54.1923	-82.6874	54.1952	-390.339	54.195	-546.265	54.1966	-5919.02	54.1923	-3576.13
54.4954	-10000.2	54.4943	-87.2392	54.4919	-77.5362	54.4948	-377.684	54.4949	-537.22	54.4962	-5920.47	54.4919	-3574.89
54.795	-9858.81	54.7938	-85.6763	54.7913	-74.2433	54.7942	-361.642	54.7944	-526.199	54.7956	-5858.69	54.7913	-3562.93
55.0944	-9720.25	55.0932	-81.5123	55.0907	-69.3839	55.0935	-349.526	55.0939	-517.444	55.0949	-5869.31	55.0907	-3492.34
55.3939	-9621.76	55.3925	-78.781	55.3901	-63.0952	55.3928	-338.734	55.3932	-507.86	55.3942	-5855.19	55.3901	-3448.31
55.6934	-9488.11	55.6921	-77.6372	55.6897	-57.6875	55.6922	-323.493	55.6927	-490.325	55.6935	-5840.46	55.6897	-3434.39
55.9929	-9332.62	55.9915	-76.9225	55.9891	-51.8376	55.9915	-307.788	55.992	-477.382	55.9927	-5781.99	55.9891	-3432.94
56.2925	-9196.72	56.2907	-77.2972	56.2883	-48.295	56.2906	-294.352	56.291	-465.717	56.2916	-5770.93	56.2883	-3459.66
56.5924	-9100.36	56.59	-75.9682	56.5877	-42.452	56.5899	-280.622	56.5901	-448.359	56.5907	-5726.8	56.5877	-3426.87
56.8924	-9048.66	56.8899	-76.2201	56.8878	-38.1246	56.8898	-264.231	56.8898	-432.098	56.8905	-5705.24	56.8878	-3377.5
57.1927	-8930.68	57.1899	-76.0987	57.1882	-31.5927	57.19	-244.813	57.1896	-411.533	57.1905	-5677.6	57.1882	-3320.8
57.4932	-8840.89	57.4899	-75.0648	57.4886	-25.8559	57.4902	-222.232	57.4895	-385.28	57.4906	-5642.02	57.4886	-3251.59
57.7937	-8775.07	57.7903	-73.4744	57.7894	-18.9851	57.7907	-196.453	57.7899	-358.714	57.7911	-5619.04	57.7894	-3202.95
58.0944	-8698.8	58.091	-73.1938	58.0903	-12.9586	58.0916	-164.354	58.0906	-325.706	58.0918	-5555.87	58.0903	-3199.36
58.3947	-8598.04	58.3917	-73.5226	58.3913	-4.13453	58.3925	-127.279	58.3914	-291.712	58.3926	-5453.16	58.3913	-3138.71
58.6952	-8476.97	58.6921	-73.1778	58.692	3.39967	58.6931	-87.1022	58.692	-255.175	58.6931	-5337.96	58.692	-3088.06
58.996	-8389.84	58.9925	-73.401	58.9927	11.2144	58.9937	-39.4458	58.9927	-211.809	58.9937	-5226.73	58.9927	-3027.32
59.2968	-8281.15	59.2932	-71.5435	59.2936	23.1773	59.2944	16.9124	59.2936	-156.391	59.2945	-5076.45	59.2936	-2931.58
59.5973	-8073.86	59.5938	-72.7365	59.5943	36.0905	59.595	82.5441	59.5944	-98.9968	59.5951	-4887.46	59.5943	-2871.07
59.8977	-7857.42	59.8938	-70.4559	59.8944	52.0681	59.8951	156.858	59.8946	-33.898	59.895	-4677.49	59.8944	-2834.11
60.1979	-7689.57	60.1936	-68.9674	60.1942	67.5915	60.1949	238.768	60.1944	39.3595	60.1947	-4456.97	60.1942	-2814.53
60.4981	-7484.94	60.4933	-69.6081	60.4938	86.0541	60.4945	332.204	60.4942	114.979	60.4943	-4181.41	60.4938	-2805.42
60.7983	-7268.61	60.7929	-68.7298	60.7932	107.747	60.7939	435.177	60.7937	202.54	60.7937	-3923.14	60.7932	-2779.31
61.0984	-7054.51	61.0924	-69.1345	61.0924	133.221	61.0932	552.077	61.093	303.427	61.093	-3636	61.0924	-2724.16
61.3987	-6789.05	61.3919	-66.8139	61.3916	158.348	61.3925	682.99	61.3924	417.095	61.3924	-3318.12	61.3916	-2685.54
61.6988	-6586.52	61.6916	-66.4538	61.691	190.28	61.6921	830.546	61.6919	541.893	61.6921	-2972.62	61.691	-2643.35
61.9986	-6301.88	61.9915	-63.6597	61.9904	228.348	61.9916	992.979	61.9914	682.914	61.9917	-2591.14	61.9904	-2569.47
62.2982	-6008.92	62.2911	-61.4848	62.2897	269.52	62.2911	1173.69	62.2906	836.971	62.2913	-2173.17	62.2897	-2531.92
62.5978	-5737.36	62.5907	-57.5776	62.589	312.739	62.5906	1370.44	62.59	1002.87	62.591	-1723.23	62.589	-2499.73
62.8975	-5421	62.891	-53.9604	62.8888	361.221	62.8907	1586.15	62.8901	1187.84	62.8914	-1218.55	62.8888	-2392.06
63.1974	-5068.44	63.1917	-50.9689	63.1891	417.296	63.1912	1828.68	63.1907	1391.13	63.1922	-662.683	63.1891	-2272.16
63.4973	-4674.24	63.4925	-46.5206	63.4896	479.442	63.4919	2093.97	63.4913	1618.45	63.493	-78.2497	63.4896	-2127.65
63.7974	-4192.13	63.7933	-42.1488	63.7901	545.397	63.7927	2384.82	63.7921	1861.79	63.7939	580.1	63.7901	-1967.61
64.0975	-3627.49	64.094	-36.3736	64.0907	617.617	64.0934	2697.05	64.0928	2122.25	64.0947	1257.91	64.0907	-1834.68
64.3976	-3118.75	64.3945	-31.58	64.391	698.709	64.3938	3034.16	64.3934	2400.72	64.3952	1991.93	64.391	-1692.57
64.6977	-2516.89	64.695	-21.641	64.6913	786.249	64.6942	3392.41	64.6939	2704.5	64.6957	2753.73	64.6913	-1497.88
64.9982	-1887.18	64.9955	-11.989	64.9917	877.434	64.9947	3775.53	64.9945	3031.27	64.9962	3564.46	64.9917	-1321.12
65.2988	-1213.75	65.2961	-2.34598	65.2923	978.798	65.2954	4183.29	65.2952	3372.79	65.2969	4408.68	65.2923	-1129.19
65.5995	-519.482	65.5967	8.94426	65.5928	1089.2	65.5959	4617.83	65.5959	3744.9	65.5973	5257.9	65.5928	-914.316
65.9	211.475	65.8967	20.1051	65.893	1206.17	65.896	5070.78	65.8962	4131.61	65.8973	6116.04	65.893	-744.52
66.2004	976.891	66.1963	32.8888	66.1928	1331.14	66.1956	5530.18	66.1959	4533.26	66.1969	7023.6	66.1928	-549.919
66.5006	1745.2	66.4958	48.8782	66.4925	1460.98	66.4952	6004.09	66.4955	4943.52	66.4964	7897.5	66.4925	-371.425
66.8007	2485.66	66.7952	63.4786	66.792	1596.75	66.7946	6488.15	66.795	5377.34	66.7959	8778.66	66.792	-231.155
67.1007	3192.03	67.0947	79.9761	67.0916	1737.18	67.0941	6973.08	67.0944	5814.66	67.0953	9655.39	67.0916	-74.7412
67.4008	3964.48	67.3944	98.1195	67.3915	1878.52	67.3938	7445.91	67.394	6259.02	67.395	10469.1	67.3915	73.0553
67.7007	4736.74	67.6941	112.549	67.6914	2019	67.6936	7913.79	67.6937	6686.65	67.6947	11224.1	67.6914	163.756
68.0004	5448.13	67.9936	125.567	67.9911	2155.37	67.9931	8357.02	67.9933	7086.55	67.9943	11902.5	67.9911	210.827
68.2999	6108	68.293	138.96	68.2905	2277.43	68.2924	8749.66	68.2926	7456.8	68.2937	12457	68.2905	226.212
68.5995	6722.81	68.5924	151.132	68.59	2386.98	68.5917	9075.68	68.5919	7778.05	68.5932	12876.8	68.59	217.888
68.8992	7230.78	68.8921	159.793	68.8897	2474.61	68.8914	9324.1	68.8915	8049.57	68.8929	13196.6	68.8897	146.571
69.1988	7617.26	69.192	165.962	69.1894	2531.66	69.1911	9490.7	69.1912	8238.69	69.1928	13221.9	69.1894	-15.1706
69.4983	7864.13	69.492	166.352	69.4892	2555.47	69.491	9531.2	69.491	8352.05	69.4927	13095.6	69.4892	-197.398
69.7979	7944.99	69.7921	163.704	69.7892	2541.8	69.791	9452.22	69.791	8339.22	69.7928	12759.2	69.7892	-406.885
70.0974	7858.25	70.0923	155.24	70.0893	2483.09	70.0911	9239.24	70.0912	8211.44	70.0931	12170.1	70.0893	-659.903
70.3969	7591.61	70.3924	141.155	70.3893	2379.54	70.3912	8901.88	70.3913	7962.67	70.3932	11358.6	70.3893	-935.759
70.6965	7103.33	70.6925	123.17	70.6892	2233.59	70.6913	8413.44	70.6914	7599.92	70.6932	10336.6	70.6892	-1195.96
70.9964	6466.49	70.9928	102.802	70.9894	2046.99	70.9916	7797.56	70.9916	7148.13	70.9934	9083.17	70.9894	-1440.3
71.2963	5653.19	71.2934	77.7728	71.2899	1828.11	71.2921	7081.73	71.292	6595.32	71.2939	7746.57	71.2899	-1671.23
71.596	4698.62	71.5939	49.2231	71.5904	1574.7	71.5926	6291.62	71.5925	5982.44	71.5943	6290.8	71.5904	-1883.28
71.8957	3641.36	71.8943	21.722	71.8908	1304.25	71.893	5458.95	71.8928	5291.22	71.8947	4704.61	71.8908	-2042.26
72.1956	2524.9	72.1946	-7.29249	72.1912	1027.97	72.1934	4606.59	72.1932	4601.58	72.1951	3252.14	72.1912	-2090.91
72.4957	1398.06	72.495	-34.105	72.4916	754.781	72.4938	3789.47	72.4937	3902.77	72.4955	1784.63	72.4916	-2121.09
72.7957	315.276	72.7952	-59.7397	72.7918	490.453	72.7941	2999.27	72.794	3254.12	72.7958	371.189	72.7918	-2101.9
73.0957	-670.237	73.0952	-82.6126	73.0918	248.232	73.0942	2290.43	73.094	2671.59	73.0959	-868.015	73.0918	-2022.02
73.3959	-1610.36	73.3951	-102.743	73.3918	34.1285	73.3942	1667.53	73.394	2174.04	73.3959	-1923.15	73.3918	-1935.05
73.6958	-2363.98	73.695	-118.867	73.6917	-153.14	73.6941	1172.66	73.6939	1776.45	73.6959	-2724.88	73.6917	-1835.99
73.9954	-2991.95	73.9948	-133.838	73.9915	-303.393	73.9939	809.903	73.9938	1465.49	73.9958	-3281.93	73.9915	-1681.8
74.2953	-3386.85	74.2946	-143.908	74.2911	-420.489	74.2936	566.789	74.2935	1279.92	74.2956	-3709.1	74.2911	-1462.54
74.5955	-3583.42	74.5941	-152.665	74.5906	-499.521	74.5932	444.056	74.5931	1162.5	74.5952	-3874.45	74.5906	-1248.87
74.8957	-3607.01	74.8937	-160.016	74.8901	-545.499	74.8929	426.525	74.8928	1190.34	74.8949	-3824.7	74.8901	-982.095
75.1957	-3414.95	75.1933	-162.658	75.1896	-565.874	75.1925	494.936	75.1924	1276.02	75.1944	-3655.05	75.1896	-727.751
75.4956	-3062.9	75.4929	-166.48	75.4891	-555.324	75.4921	655.139	75.4919	1450.28	75.494	-3246.32	75.4891	-456.622
75.7956	-2532.15	75.7927	-167.427	75.7889	-519.823	75.7919	909.475	75.7917	1687.78	75.7939	-2674.55	75.7889	-136.822
76.0955	-1923.03	76.0927	-166.133	76.0889	-459.341	76.0918	1222.64	76.0917	1982.93	76.0938	-1965.08	76.0889	230.028
76.3954	-1087.38	76.3928	-163.95	76.3889	-379.52	76.3918	1603.78	76.3917	2313.18	76.3938	-1147.87	76.3889	632.379
76.6955	-176.627	76.6928	-160.952	76.6889	-277.604	76.6918	2004.91	76.6918	2668.51	76.6938	-342.111	76.6889	1029.65
76.9957	840.092	76.9929	-153.973	76.989	-167.044	76.9918	2420.09	76.9919	3052.44	76.9939	446.926	76.989	1504.52
77.2958	1843.28	77.293	-147.437	77.2892	-41.7845	77.292	2860.4	77.2921	3445.85	77.2941	1233.03	77.2892	1858.54
77.5957	2816.93	77.5934	-139.302	77.5897	94.3821	77.5923	3312.93	77.5925	3870.37	77.5945	2052.45	77.5897	2277.53
77.8956	3818.36	77.8939	-130.13	77.8902	237.22	77.8927	3776.52	77.8929	4280.15	77.895	2808.28	77.8902	2534.07
78.1958	4791.92	78.1946	-120.408	78.1909	388.398	78.1932	4287.63	78.1933	4738.63	78.1955	3516.51	78.1909	2726.09
78.496	5675.36	78.4951	-108.943	78.4915	531.92	78.4936	4784.08	78.4937	5183.52	78.496	4038.26	78.4915	2879.56
78.7962	6352.82	78.7955	-97.9633	78.7919	676.26	78.7939	5241.02	78.7939	5579.34	78.7962	4406.98	78.7919	2883.72
79.0962	6921.83	79.0956	-89.1072	79.0921	803.491	79.0941	5626.94	79.0939	5892.06	79.0962	4538.92	79.0921	2670.06
79.3962	7122.68	79.3958	-80.2373	79.3924	913.369	79.3943	5888.62	79.3939	6093.78	79.3963	4405.87	79.3924	2390.93
79.6962	7068.49	79.696	-70.3085	79.6927	991.52	79.6946	6060.76	79.694	6206.48	79.6965	4098.88	79.6927	2010.78
79.9959	6716.13	79.9962	-64.5295	79.993	1053.13	79.995	6115.28	79.994	6190.19	79.9966	3673.73	79.993	1373.27
80.2955	6135.64	80.2963	-60.743	80.2932	1074.89	80.2952	6019.68	80.294	6027.26	80.2966	3182.62	80.2932	841.998
80.5952	5393.54	80.5962	-54.6349	80.5932	1068.68	80.5952	5783.32	80.5938	5723.82	80.5965	2358.95	80.5932	95.522
80.8948	4383.33	80.896	-51.6832	80.8931	1027.88	80.8951	5388.55	80.8936	5271.57	80.8962	1450.17	80.8931	-473.48
81.1942	3110.88	81.1956	-53.0731	81.1929	953.242	81.195	4783.19	81.1934	4611.08	81.1959	387	81.1929	-1065.98
81.4938	1717.53	81.495	-54.1387	81.4925	854.031	81.4947	4019.55	81.4932	3800.16	81.4954	-690.406	81.4925	-1668.24
81.7935	337.837	81.7947	-54.8969	81.7923	723.052	81.7946	3146.09	81.7931	2929.33	81.7952	-1776.14	81.7923	-2180.35
82.0935	-1070.73	82.0947	-55.8846	82.0924	578.424	82.0947	2236.26	82.0933	2044.65	82.0952	-2753.14	82.0924	-2523.55
82.3937	-2284.41	82.3947	-56.4363	82.3925	421.413	82.3947	1348.22	82.3935	1197.01	82.3953	-3616.34	82.3925	-2858.21
82.694	-3378.62	82.6947	-60.9167	82.6925	274.83	82.6947	486.733	82.6937	358.364	82.6953	-4342.18	82.6925	-3048.61
82.9945	-4305.64	82.995	-62.8112	82.9927	122.591	82.9949	-323.707	82.9941	-402.396	82.9954	-4952.48	82.9927	-3143.68
83.2953	-5063.89	83.2954	-62.7275	83.2929	-10.6045	83.2951	-1033.93	83.2945	-1062.72	83.2956	-5533.54	83.2929	-3311.15
83.5961	-5715.77	83.5957	-65.3899	83.593	-137.198	83.5952	-1654.81	83.5948	-1632.59	83.5957	-5879.12	83.593	-3326.48
83.8968	-6176.67	83.896	-65.0596	83.8931	-249.36	83.8954	-2161.08	83.8952	-2131.75	83.896	-6159.94	83.8931	-3411.27
84.1975	-6478.93	84.1963	-62.2957	84.1933	-346.7	84.1956	-2548.48	84.1954	-2470.74	84.1962	-6328.99	84.1933	-3435.24
84.498	-6621.72	84.4968	-59.6121	84.4935	-428.047	84.4958	-2819.75	84.4958	-2684.22	84.4965	-6389.29	84.4935	-3450.88
84.7985	-6722.2	84.7973	-59.5261	84.7937	-491.134	84.796	-2987.6	84.7961	-2837.96	84.7969	-6379.53	84.7937	-3494.37
85.0988	-6760.13	85.0976	-57.9548	85.0938	-543.096	85.0961	-3097.85	85.0964	-2951.91	85.0971	-6371.3	85.0938	-3543.53
85.3988	-6816.25	85.3979	-57.9821	85.3939	-578.442	85.3962	-3174.02	85.3966	-3023.29	85.3973	-6335.52	85.3939	-3558.2
85.6988	-6811.91	85.6981	-54.8986	85.694	-615.722	85.6962	-3220.19	85.6967	-3054.41	85.6975	-6296.03	85.694	-3659.9
85.9986	-6761.12	85.9981	-52.7859	85.9939	-642.335	85.9962	-3242.93	85.9967	-3079.41	85.9975	-6298.13	85.9939	-3679.46
86.2983	-6727.99	86.298	-52.4195	86.2938	-665.491	86.296	-3262.37	86.2966	-3107.73	86.2974	-6278.88	86.2938	-3675.63
86.598	-6656.91	86.5978	-50.9867	86.5936	-683.558	86.5957	-3280.88	86.5964	-3127.57	86.5973	-6302.8	86.5936	-3693.6
86.8978	-6592.9	86.8975	-51.8197	86.8934	-695.3	86.8954	-3295.28	86.8961	-3092.8	86.8971	-6285.27	86.8934	-3690.31
87.1979	-6499.03	87.1972	-51.8957	87.1932	-699.809	87.1952	-3280.47	87.1959	-3111.28	87.1969	-6240.27	87.1932	-3712.21
87.4981	-6486.44	87.497	-54.0977	87.493	-704.665	87.495	-3263.61	87.4956	-3131.24	87.4967	-6254.06	87.493	-3670.51
87.7981	-6413.1	87.7967	-54.1843	87.7927	-708.759	87.7947	-3246.73	87.7953	-3138.7	87.7964	-6273.15	87.7927	-3598.15
88.098	-6325.89	88.0962	-55.3262	88.0924	-708.244	88.0944	-3243.95	88.0948	-3143.01	88.0959	-6268.95	88.0924	-3566.51
88.3978	-6224.67	88.3956	-55.4084	88.3919	-712.561	88.3938	-3227.3	88.3943	-3146.54	88.3953	-6249.59	88.3919	-3544.92
88.6976	-6178.5	88.6949	-54.8646	88.6914	-710.845	88.6933	-3213.42	88.6937	-3138.63	88.6946	-6273.65	88.6914	-3508.21
88.9975	-6177.8	88.9942	-56.7348	88.9908	-711.836	88.9927	-3195.1	88.9931	-3142	88.994	-6238.23	88.9908	-3495.2
89.2971	-6172.72	89.2937	-55.969	89.2904	-707.137	89.2923	-3166.25	89.2928	-3133.69	89.2935	-6206.74	89.2904	-3473.55
89.5965	-6204.08	89.5935	-56.9812	89.5903	-705.552	89.5923	-3133.67	89.5928	-3115.58	89.5933	-6138.25	89.5903	-3423.72
89.8958	-6231.53	89.8935	-56.9991	89.8904	-706.22	89.8923	-3107.38	89.8929	-3131.66	89.8933	-6116.72	89.8904	-3446.66
90.195	-6271.24	90.1935	-58.5275	90.1904	-707.028	90.1923	-3094.9	90.1931	-3102.57	90.1932	-6130.48	90.1904	-3456.1
90.4941	-6223.52	90.4934	-57.3406	90.4904	-709.348	90.4922	-3074.02	90.4933	-3082.43	90.4932	-6105.21	90.4904	-3510.08
90.7933	-6243.38	90.7933	-57.1891	90.7904	-706.555	90.7923	-3056.76	90.7934	-3065.64	90.7932	-6067.01	90.7904	-3572.44
91.0926	-6261.7	91.0933	-56.4613	91.0905	-705.506	91.0924	-3011.05	91.0936	-3046.75	91.0933	-6069.56	91.0905	-3617.55
91.3921	-6261.76	91.3934	-55.3368	91.3905	-701.269	91.3926	-2964.16	91.3937	-3035.22	91.3935	-6076.68	91.3905	-3655.05
91.6918	-6272.04	91.6932	-58.1557	91.6902	-697.401	91.6926	-2913.82	91.6937	-3035.8	91.6934	-6068.25	91.6902	-3637.45
91.9916	-6243.46	91.9931	-57.3094	91.99	-687.024	91.9925	-2863.72	91.9937	-3018.29	91.9934	-6100.85	91.99	-3672.38
92.2916	-6194	92.2929	-59.208	92.2898	-685.354	92.2923	-2837.16	92.2935	-2998.85	92.2931	-6134.44	92.2898	-3737.62
92.5918	-6142.18	92.5924	-59.6932	92.5892	-678.244	92.5919	-2810.95	92.5931	-2988.63	92.5927	-6194.5	92.5892	-3814.92
92.8921	-6102.24	92.8918	-57.5771	92.8884	-667.439	92.8915	-2789.72	92.8926	-2961.56	92.8921	-6214.39	92.8884	-3832.58
93.1923	-6075.12	93.1913	-56.6341	93.1877	-661.523	93.1911	-2776.06	93.1922	-2950.29	93.1915	-6224.5	93.1877	-3853.66
93.4924	-6091.77	93.4907	-57.4259	93.4869	-646.187	93.4907	-2769.92	93.4917	-2934.37	93.4909	-6232.53	93.4869	-3886.43
93.7928	-6082.09	93.7901	-56.9769	93.7861	-636.886	93.7902	-2777.61	93.7911	-2923.99	93.7902	-6272.62	93.7861	-3927.68
94.0935	-6079.02	94.0893	-57.9231	94.0854	-630.208	94.0895	-2798.84	94.0906	-2904.17	94.0893	-6287.72	94.0854	-3956.16
94.3939	-6123.24	94.389	-59.9479	94.3851	-623.853	94.3892	-2841.79	94.3904	-2887.84	94.3888	-6286.45	94.3851	-3985.64
94.6941	-6120.44	94.6892	-58.5249	94.6853	-617.796	94.6894	-2895.17	94.6908	-2871.69	94.6889	-6252.65	94.6853	-4091.47
94.9942	-6164.47	94.9896	-58.6123	94.9856	-617.188	94.9896	-2960.68	94.9914	-2836.54	94.9892	-6250.06	94.9856	-4159.31
95.2943	-6241.09	95.2901	-57.7514	95.2861	-613.71	95.2899	-2994.7	95.2921	-2821.67	95.2896	-6219.52	95.2861	-4189.02
95.5944	-6313.49	95.5906	-57.248	95.5867	-609.727	95.5903	-3026.43	95.5927	-2800.83	95.5901	-6201.41	95.5867	-4242.5
95.8946	-6407.69	95.8911	-59.646	95.8874	-609.354	95.8906	-3054.81	95.8933	-2771.13	95.8905	-6193.52	95.8874	-4274.04
96.1945	-6461.28	96.1912	-60.5688	96.1877	-606.307	96.1905	-3074.05	96.1935	-2745.14	96.1906	-6167.43	96.1877	-4322.02

## Sheet: Figure 1B
Figure 1B: Protein Concentration optimization by Size Exclusion Chromatography (SEC)
Elution Volume (mL)	A280 (mAU)
	MS-Hu 6 in PBS (1 mg/mL)	Formulation (1 mg/mL)	Formulation (10 mg/mL)	Formulation (20 mg/mL)	Formulation (50 mg/mL)	Formulation (100 mg/mL)
0	2.80098	-0.000850787	0.0244677	3.21453	32.3106	0.359827
0.001	23.3214	0.0919696	0.0453587	149.281	160.152	12.4725
0.001	30.5706	0.149076	0.052728	250.109	216.999	17.5169
0.002	28.6752	0.154332	0.0588275	267.943	226.251	16.501
0.003	24.1583	0.157246	0.0635249	278.504	232.204	15.9938
0.003	19.7402	0.158759	0.0657433	286.027	236.866	15.4866
0.004	18.6713	0.161022	0.0676418	292.097	240.764	15.0903
0.005	17.3078	0.162954	0.0701489	297.375	244.364	14.9655
0.005	16.8426	0.16512	0.073021	302.268	247.88	14.787
0.006	16.6777	0.167802	0.0755984	306.941	251.426	14.6741
0.007	15.0846	0.169886	0.0792761	311.403	254.983	14.4391
0.007	13.9634	0.172836	0.081363	315.674	258.509	14.2308
0.008	13.3375	0.175811	0.0831211	319.69	262.097	14.0557
0.009	12.4392	0.177031	0.0853158	323.38	265.757	13.7094
0.009	12.0048	0.17774	0.0873845	326.877	269.432	13.528
0.01	11.468	0.17853	0.0889263	330.288	273.226	13.4092
0.011	11.0045	0.180468	0.0911667	333.632	277.063	11.8425
0.011	10.8811	0.183179	0.0927533	336.935	281.026	9.55187
0.012	10.6654	0.18507	0.093034	340.234	285.154	8.09737
0.013	10.1507	0.185737	0.094549	343.548	289.365	7.36695
0.013	6.74887	0.186432	0.0967696	346.891	293.808	7.3114
0.014	4.44922	0.187047	0.0987171	350.258	298.393	7.19725
0.015	3.9751	0.187582	0.10036	353.678	303.182	6.99219
0.015	3.34442	0.189062	0.102182	357.179	308.093	6.71749
0.016	2.69404	0.191907	0.103879	360.78	313.229	6.47564
0.017	2.36846	0.19374	0.105807	364.483	318.644	6.41319
0.017	2.37322	0.194487	0.108788	367.891	323.693	6.41038
0.018	1.9119	0.195416	0.112019	368.2	324.81	6.41243
0.019	1.53807	-0.0271193	-0.0362278	361.798	322.798	6.41443
0.019	1.54126	-0.208598	-0.0948258	355.063	320.009	6.41597
0.02	1.41734	-0.239422	-0.131277	348.943	317.732	6.27154
0.021	0.487493	-0.238195	-0.145965	346.712	311.906	2.69725
0.021	-0.193262	-0.237327	-0.146025	348.408	308.194	-0.241972
0.022	-0.1941	-0.237197	-0.147077	350.692	305.738	-0.293768
0.023	-0.194237	-0.237544	-0.147959	352.302	300.678	-0.294156
0.023	-0.193976	-0.238263	-0.149836	348.467	296.861	-0.293631
0.024	-0.194011	-0.238837	-0.152482	340.298	294.649	-0.293397
0.025	-0.195214	-0.239487	-0.154551	332.045	293.02	-0.293476
0.025	-0.196246	-0.239755	-0.15714	325.321	291.391	-0.292541
0.026	-0.195816	-0.240877	-0.15985	320.283	289.289	-0.291691
0.027	-0.194654	-0.242056	-0.161714	314.703	285.051	-0.29121
0.027	-0.193985	-0.24263	-0.162925	308.91	279.284	-0.290762
0.028	-0.194361	-0.243402	-0.163648	303.605	272.892	-0.290725
0.029	-0.194573	-0.242684	-0.164105	298.527	266.203	-0.290112
0.029	-0.194271	-0.242017	-0.164754	293.335	259.63	-0.289356
0.03	-0.193659	-0.240988	-0.165766	287.681	253.248	-0.289157
0.031	-0.192917	-0.240333	-0.166205	281.465	247.057	-0.288939
0.031	-0.192128	-0.239702	-0.165999	274.701	241.093	-0.288978
0.032	-0.191379	-0.240541	-0.165998	267.574	235.422	-0.289803
0.033	-0.19058	-0.23993	-0.166064	260.218	230.077	-0.290689
0.033	-0.190147	-0.239524	-0.165694	252.781	225.06	-0.290617
0.034	-0.189238	-0.238585	-0.165398	245.533	220.378	-0.290333
0.035	-0.187688	-0.237833	-0.166469	238.517	215.986	-0.290548
0.035	-0.186073	-0.237002	-0.166366	231.837	211.833	-0.291128
0.036	-0.185417	-0.236852	-0.165903	225.583	207.898	-0.29209
0.037	-0.185488	-0.236363	-0.165062	219.711	204.129	-0.292629
0.037	-0.184519	-0.235605	-0.164388	214.203	200.478	-0.293221
0.038	-0.183653	-0.23431	-0.163495	208.993	196.891	-0.293114
0.039	-0.182271	-0.232558	-0.163	204.075	193.341	-0.293542
0.039	-0.181315	-0.232773	-0.16234	199.411	189.362	-0.294698
0.04	-0.179908	-0.233183	-0.162763	194.933	185.001	-0.294962
0.041	-0.179073	-0.233136	-0.16204	190.675	181.292	-0.294444
0.041	-0.17879	-0.233658	-0.161032	186.606	177.661	-0.294056
0.042	-0.178604	-0.233219	-0.159024	182.728	173.987	-0.293743
0.043	-0.177696	-0.231558	-0.157251	179.01	170.232	-0.293489
0.043	-0.176429	-0.230264	-0.15586	175.398	166.432	-0.293388
0.044	-0.174191	-0.229465	-0.155541	171.852	162.535	-0.291862
0.045	-0.171815	-0.228959	-0.154583	168.362	158.503	-0.290906
0.045	-0.171304	-0.228143	-0.153225	164.91	154.38	-0.290532
0.046	-0.171116	-0.226098	-0.152316	161.471	150.077	-0.290102
0.047	-0.170076	-0.223323	-0.151644	157.963	145.636	-0.289227
0.047	-0.168682	-0.221594	-0.151542	154.434	140.99	-0.288056
0.048	-0.167544	-0.219777	-0.151031	150.89	136.163	-0.288004
0.049	-0.166203	-0.218823	-0.150375	147.25	131.199	-0.289213
0.049	-0.165611	-0.218341	-0.150544	143.535	126.007	-0.290281
0.05	-0.165984	-0.216995	-0.150546	139.769	120.602	-0.289979
0.051	-0.164786	-0.214182	-0.151202	135.892	114.907	-0.289615
0.051	-0.163631	-0.21215	-0.152117	131.896	108.817	-0.289723
0.052	-0.162992	-0.210866	-0.152371	127.759	102.334	-0.290228
0.053	-0.161861	-0.210539	-0.152913	123.528	95.3876	-0.29041
0.053	-0.160174	-0.208947	-0.153869	119.021	87.8483	-0.291168
0.054	-0.157624	-0.207713	-0.155437	114.279	79.805	-0.292026
0.055	-0.155472	-0.206914	-0.157322	109.37	71.2461	-0.291829
0.055	-0.153906	-0.206989	-0.158348	104.253	62.1422	-0.291318
0.056	-0.152903	-0.204976	-0.157796	98.8651	52.8479	-0.289616
0.057	-0.151719	-0.204376	-0.156345	93.1596	43.6571	-0.289824
0.057	-0.149728	-0.203641	-0.154134	87.014	34.7952	-0.290901
0.058	-0.147777	-0.203599	-0.152363	80.3579	26.7688	-0.291865
0.059	-0.146961	-0.203003	-0.150757	73.0644	19.7028	-0.292599
0.059	-0.147307	-0.2025	-0.149641	65.0838	13.7785	-0.293364
0.06	-0.14749	-0.202567	-0.149074	56.4356	9.01162	-0.293942
0.061	-0.147476	-0.202228	-0.148432	47.2085	5.31724	-0.294819
0.061	-0.147761	-0.200366	-0.148179	37.8548	2.49514	-0.295403
0.062	-0.14785	-0.200105	-0.148067	28.8596	0.478705	-0.295551
0.063	-0.14805	-0.200016	-0.148553	20.7929	-0.875019	-0.295457
0.063	-0.148257	-0.200823	-0.148115	14.1317	-1.70063	-0.294252
0.064	-0.14797	-0.200629	-0.146825	8.70329	-2.13831	-0.292842
0.065	-0.148003	-0.201404	-0.146425	4.40352	-2.33104	-0.292928
0.065	-0.148399	-0.200185	-0.146059	1.25362	-2.37662	-0.292743
0.066	-0.149065	-0.200409	-0.145669	-0.903837	-2.35637	-0.291687
0.067	-0.148898	-0.20088	-0.145868	-2.28595	-2.31666	-0.291646
0.067	-0.148842	-0.200637	-0.146449	-3.08915	-2.27704	-0.291666
0.068	-0.14986	-0.198217	-0.147026	-3.49729	-2.24215	-0.292308
0.069	-0.15055	-0.194971	-0.14737	-3.66834	-2.21316	-0.292183
0.069	-0.149724	-0.189251	-0.145823	-3.71588	-2.18883	-0.291783
0.07	-0.149745	-0.181772	-0.141683	-3.71283	-2.17017	-0.29174
0.071	-0.15098	-0.171908	-0.136053	-3.6972	-2.15372	-0.292182
0.071	-0.152247	-0.158492	-0.129344	-3.68209	-2.13841	-0.29151
0.072	-0.151805	-0.140969	-0.121118	-3.66879	-2.12415	-0.291521
0.073	-0.149104	-0.12015	-0.111289	-3.65732	-2.11038	-0.289546
0.073	-0.144325	-0.0959082	-0.0979878	-3.64738	-2.09739	-0.284743
0.074	-0.13693	-0.068456	-0.0809316	-3.64038	-2.08471	-0.278169
0.075	-0.126703	-0.0359161	-0.0624152	-3.63557	-2.07292	-0.269322
0.075	-0.113811	0.000165894	-0.0432745	-3.63107	-2.0616	-0.257655
0.076	-0.0999328	0.0369285	-0.0229923	-3.62774	-2.05046	-0.241713
0.077	-0.0844597	0.073585	-0.00314092	-3.62432	-2.04008	-0.222942
0.077	-0.0664758	0.110169	0.0163402	-3.62052	-2.03019	-0.20033
0.078	-0.0452666	0.144446	0.0343386	-3.61732	-2.02077	-0.17245
0.079	-0.0207767	0.175631	0.0507361	-3.61443	-2.0108	-0.140325
0.079	0.00507405	0.205286	0.0659072	-3.61134	-2.00048	-0.104213
0.08	0.0299122	0.231812	0.0795958	-3.60744	-1.9904	-0.0650395
0.081	0.0541625	0.258271	0.0924171	-3.60327	-1.98035	-0.0256725
0.081	0.0783476	0.282651	0.105276	-3.59953	-1.96956	0.0137234
0.082	0.10185	0.305945	0.118322	-3.59506	-1.95843	0.0557872
0.083	0.125221	0.325492	0.130179	-3.59018	-1.94692	0.0979166
0.083	0.147332	0.344159	0.140821	-3.58619	-1.93591	0.137674
0.084	0.166842	0.359083	0.151185	-3.58248	-1.92538	0.176459
0.085	0.184879	0.374332	0.160751	-3.57853	-1.9155	0.214066
0.085	0.201876	0.389828	0.169679	-3.57401	-1.90607	0.248977
0.086	0.218244	0.404334	0.178456	-3.56857	-1.89659	0.281352
0.087	0.233943	0.416535	0.187204	-3.56349	-1.88714	0.313071
0.087	0.247831	0.427992	0.196033	-3.55895	-1.87856	0.342359
0.088	0.261554	0.438528	0.204626	-3.55375	-1.87013	0.369473
0.089	0.275368	0.449633	0.213644	-3.54852	-1.86241	0.395549
0.089	0.288145	0.459529	0.221202	-3.54486	-1.85556	0.418753
0.09	0.300037	0.46816	0.227386	-3.54227	-1.84899	0.441274
0.091	0.310771	0.47745	0.234479	-3.53869	-1.84238	0.462198
0.091	0.32084	0.485998	0.241209	-3.53468	-1.8359	0.48126
0.092	0.331225	0.494538	0.24652	-3.53155	-1.82953	0.499173
0.093	0.341573	0.502351	0.251694	-3.5289	-1.82316	0.515907
0.093	0.351107	0.510583	0.257251	-3.52705	-1.81725	0.532003
0.094	0.360571	0.518285	0.262521	-3.52501	-1.81154	0.547515
0.095	0.369294	0.525071	0.267258	-3.52241	-1.80627	0.562359
0.095	0.376839	0.531775	0.272261	-3.51972	-1.80091	0.574643
0.096	0.384809	0.538457	0.277578	-3.51653	-1.79474	0.585343
0.097	0.392222	0.545425	0.282126	-3.51367	-1.78708	0.595131
0.097	0.398811	0.551196	0.285596	-3.51024	-1.77771	0.603176
0.098	0.405387	0.558016	0.289114	-3.50576	-1.7682	0.612777
0.099	0.411625	0.563936	0.292981	-3.5009	-1.76063	0.622711
0.099	0.417666	0.5698	0.296625	-3.49614	-1.7569	0.629615
0.1	0.423287	0.576345	0.300432	-3.49532	-1.75743	0.636777
0.101	0.42912	0.581446	0.304662	-3.49836	-1.76168	0.644715
0.101	0.435974	0.584404	0.309331	-3.50449	-1.76887	0.652999
0.102	0.441879	0.585587	0.313111	-3.51351	-1.77708	0.660264
0.103	0.446324	0.58617	0.314731	-3.52492	-1.78557	0.666949
0.103	0.451266	0.583655	0.31471	-3.53747	-1.79503	0.674057
0.104	0.457176	0.579739	0.313468	-3.54967	-1.80573	0.68188
0.105	0.462612	0.570801	0.310671	-3.56118	-1.81782	0.688378
0.105	0.466347	0.557288	0.305883	-3.57362	-1.83064	0.695627
0.106	0.467808	0.540903	0.299325	-3.58718	-1.84389	0.70241
0.107	0.467707	0.521407	0.289299	-3.6009	-1.85813	0.705596
0.107	0.464637	0.496609	0.275093	-3.61406	-1.87121	0.706675
0.108	0.458293	0.467269	0.258847	-3.62596	-1.88343	0.704994
0.109	0.448937	0.436807	0.241829	-3.63808	-1.8958	0.699724
0.109	0.437584	0.404844	0.223351	-3.64932	-1.90678	0.690084
0.11	0.424942	0.373043	0.204929	-3.65982	-1.91645	0.676905
0.111	0.410109	0.341861	0.187223	-3.66982	-1.92507	0.660824
0.111	0.391851	0.312343	0.170574	-3.67895	-1.93281	0.639059
0.112	0.370461	0.285672	0.155256	-3.6882	-1.94017	0.612634
0.113	0.347893	0.259926	0.141256	-3.69685	-1.94763	0.582593
0.113	0.325699	0.236333	0.129441	-3.70511	-1.95384	0.549682
0.114	0.303616	0.214189	0.118774	-3.71337	-1.96055	0.51513
0.115	0.282136	0.193705	0.109467	-3.71982	-1.96824	0.480629
0.115	0.261733	0.175071	0.0994638	-3.72541	-1.97498	0.445444
0.116	0.241779	0.160702	0.0901671	-3.73092	-1.9809	0.410853
0.117	0.222593	0.145855	0.0824677	-3.73552	-1.985	0.37679
0.117	0.205334	0.133689	0.0748301	-3.73921	-1.98849	0.343473
0.118	0.188812	0.122303	0.0683513	-3.7436	-1.99152	0.311696
0.119	0.17311	0.110821	0.0639104	-3.74761	-1.99389	0.283046
0.119	0.158392	0.0999805	0.0590891	-3.75155	-1.99586	0.255947
0.12	0.144412	0.0916931	0.0539856	-3.75715	-1.99794	0.230299
0.121	0.131668	0.0841861	0.0492506	-3.76265	-1.99971	0.207534
0.121	0.119244	0.0769419	0.0452658	-3.76686	-2.00136	0.185506
0.122	0.107201	0.0704635	0.0414583	-3.77046	-2.00228	0.164557
0.123	0.0970258	0.0644474	0.0376192	-3.77332	-2.003	0.144789
0.123	0.0877529	0.0602405	0.0340774	-3.77456	-2.00383	0.127114
0.124	0.0789588	0.0547234	0.0294835	-3.7772	-2.00461	0.111297
0.125	0.071139	0.0506552	0.0248294	-3.78055	-2.00424	0.0972704
0.125	0.0636864	0.046129	0.0211982	-3.78314	-2.0028	0.0833958
0.126	0.0570635	0.0427804	0.0178818	-3.78497	-2.00175	0.071094
0.127	0.0518086	0.0389231	0.0141272	-3.78644	-2.00053	0.0601669
0.127	0.0462802	0.0356439	0.00996504	-3.78801	-1.99935	0.0498005
0.128	0.0416549	0.0328581	0.00739408	-3.78994	-1.99723	0.0404918
0.129	0.0370957	0.0292705	0.00521272	-3.79119	-1.99474	0.0330251
0.129	0.031526	0.0268337	0.0026701	-3.7925	-1.9928	0.0280558
0.13	0.0270875	0.0230997	0.000456523	-3.79457	-1.99222	0.0231764
0.131	0.023011	0.0197681	-0.001117	-3.79734	-1.99149	0.0180533
0.131	0.0193455	0.0161603	-0.00227324	-3.79979	-1.99105	0.0139113
0.132	0.0163302	0.0134014	-0.0038801	-3.80207	-1.99096	0.00933925
0.133	0.0123776	0.0108779	-0.00531098	-3.80432	-1.98965	0.00549453
0.133	0.00833324	0.00855115	-0.00680884	-3.80559	-1.98766	0.00152576
0.134	0.00382628	0.00771986	-0.0088475	-3.80625	-1.98676	-0.0028199
0.134	-0.00068383	0.00699592	-0.0105632	-3.80769	-1.98471	-0.00570171
0.135	-0.00401948	0.00660942	-0.0118559	-3.80852	-1.98271	-0.00810943
0.136	-0.00698468	0.0052528	-0.0133923	-3.80896	-1.98187	-0.0110842
0.136	-0.00989626	0.00397692	-0.0160501	-3.81045	-1.97965	-0.01347
0.137	-0.0131125	0.00228587	-0.0189804	-3.81237	-1.97736	-0.015309
0.138	-0.0164683	0.000805893	-0.0215101	-3.81337	-1.97523	-0.0183724
0.138	-0.0185837	-0.00101948	-0.0233931	-3.81472	-1.97351	-0.0205025
0.139	-0.0204258	-0.00252575	-0.024847	-3.81658	-1.9722	-0.0229483
0.14	-0.0222871	-0.00391283	-0.0265855	-3.81808	-1.97031	-0.0246686
0.14	-0.0243264	-0.0052764	-0.0281032	-3.81912	-1.9683	-0.0271499
0.141	-0.0259985	-0.00681935	-0.0292793	-3.81978	-1.96699	-0.0295246
0.142	-0.0267296	-0.00908399	-0.0310873	-3.82074	-1.96534	-0.0306687
0.142	-0.0269811	-0.0113578	-0.0327834	-3.82121	-1.96312	-0.0317844
0.143	-0.027301	-0.0129477	-0.0330493	-3.82207	-1.96141	-0.0332062
0.144	-0.0279871	-0.0134002	-0.0327082	-3.82313	-1.96043	-0.0362597
0.144	-0.0287151	-0.0148597	-0.0327222	-3.82417	-1.9592	-0.037728
0.145	-0.0287381	-0.0161266	-0.0325952	-3.8237	-1.95753	-0.0389563
0.146	-0.0289094	-0.0166601	-0.0329173	-3.82332	-1.95588	-0.0403593
0.146	-0.0301976	-0.0169115	-0.0334017	-3.82284	-1.95407	-0.0423335
0.147	-0.0311129	-0.0168018	-0.0345677	-3.82147	-1.95195	-0.0435801
0.148	-0.0325164	-0.0163929	-0.036597	-3.82081	-1.9486	-0.0449145
0.148	-0.0343102	-0.0163317	-0.037757	-3.82112	-1.94631	-0.0463927
0.149	-0.036134	-0.0170321	-0.0381941	-3.82152	-1.94495	-0.0477729
0.15	-0.0372114	-0.0182854	-0.0393086	-3.8214	-1.94418	-0.0498879
0.15	-0.0385667	-0.0192281	-0.0404131	-3.82132	-1.94333	-0.0512283
0.151	-0.0410569	-0.0203405	-0.0422068	-3.82128	-1.94178	-0.0516127
0.152	-0.0425053	-0.0212039	-0.0448529	-3.82148	-1.94061	-0.0535663
0.152	-0.0436913	-0.0208901	-0.0465684	-3.82161	-1.93974	-0.0551065
0.153	-0.0454279	-0.0222476	-0.0475958	-3.82115	-1.93784	-0.056968
0.154	-0.047364	-0.0229164	-0.0484908	-3.8203	-1.93602	-0.0585864
0.154	-0.0484679	-0.0224738	-0.0499597	-3.82088	-1.93384	-0.0597133
0.155	-0.0499957	-0.0230085	-0.0519717	-3.8216	-1.93169	-0.061555
0.156	-0.0518669	-0.0235058	-0.0539061	-3.82155	-1.92998	-0.0629451
0.156	-0.0536381	-0.0238919	-0.0556985	-3.82142	-1.92705	-0.0641124
0.157	-0.0548264	-0.0234133	-0.0574824	-3.82092	-1.92346	-0.0656444
0.158	-0.0568384	-0.0238864	-0.0590451	-3.81958	-1.92117	-0.0678261
0.158	-0.0582747	-0.0249061	-0.0592539	-3.81851	-1.91909	-0.0685864
0.159	-0.0605801	-0.0263159	-0.0586597	-3.81714	-1.91629	-0.0692864
0.16	-0.0623883	-0.0277992	-0.0576667	-3.81517	-1.91344	-0.0693516
0.16	-0.0640341	-0.0285104	-0.0564148	-3.81371	-1.91054	-0.06907
0.161	-0.0657798	-0.0288186	-0.0565927	-3.8122	-1.90761	-0.0704752
0.162	-0.0682577	-0.0290217	-0.0563376	-3.81066	-1.90538	-0.0707537
0.162	-0.0692262	-0.029789	-0.0566766	-3.8101	-1.90332	-0.0726846
0.163	-0.0698698	-0.0292067	-0.0569649	-3.80831	-1.90037	-0.0751314
0.164	-0.0715434	-0.0296284	-0.0575813	-3.80542	-1.89753	-0.0767556
0.164	-0.0736171	-0.0294287	-0.0582441	-3.80347	-1.89537	-0.0787699
0.165	-0.075683	-0.02979	-0.0598892	-3.80101	-1.89285	-0.0803034
0.166	-0.075616	-0.0304932	-0.0610309	-3.79925	-1.89049	-0.0814959
0.166	-0.0757098	-0.0311165	-0.0616962	-3.79729	-1.88873	-0.0817212
0.167	-0.076152	-0.0330963	-0.0622323	-3.7948	-1.88721	-0.0828518
0.168	-0.0763428	-0.0355035	-0.0630593	-3.79315	-1.886	-0.0829273
0.168	-0.0766424	-0.0373838	-0.0640214	-3.79203	-1.88532	-0.0819264
0.169	-0.0765811	-0.0377407	-0.0648534	-3.79037	-1.88336	-0.0815908
0.17	-0.0768605	-0.0376363	-0.0643373	-3.78794	-1.88201	-0.0822293
0.17	-0.0781315	-0.0394906	-0.0635128	-3.7854	-1.88127	-0.0835373
0.171	-0.0782524	-0.0399822	-0.0628862	-3.78326	-1.87969	-0.0835432
0.172	-0.0784099	-0.0400235	-0.0623304	-3.78094	-1.87766	-0.0839111
0.172	-0.0791448	-0.039635	-0.0630669	-3.77742	-1.87533	-0.0848972
0.173	-0.0793745	-0.0397051	-0.0630758	-3.77455	-1.87278	-0.086367
0.174	-0.0797021	-0.0399356	-0.0627623	-3.77198	-1.87104	-0.0877548
0.174	-0.0801222	-0.0407778	-0.0622987	-3.77032	-1.86958	-0.0897223
0.175	-0.0810031	-0.041873	-0.0616774	-3.76733	-1.86749	-0.091577
0.176	-0.0819248	-0.0429868	-0.0606693	-3.76444	-1.86593	-0.093649
0.176	-0.0830568	-0.0418458	-0.0606044	-3.76164	-1.86377	-0.0933389
0.177	-0.0846588	-0.0438793	-0.06155	-3.75821	-1.8605	-0.0935996
0.178	-0.0860487	-0.0448996	-0.0618784	-3.7549	-1.85739	-0.0952654
0.178	-0.0873345	-0.0448704	-0.0633573	-3.75313	-1.85466	-0.0964787
0.179	-0.087387	-0.0465521	-0.0643693	-3.7512	-1.85162	-0.0981877
0.18	-0.0877722	-0.0478739	-0.0654923	-3.75011	-1.84828	-0.0996411
0.18	-0.088573	-0.0499569	-0.0659223	-3.74902	-1.8456	-0.100934
0.181	-0.0884164	-0.0515625	-0.0657458	-3.74843	-1.84261	-0.100221
0.182	-0.087948	-0.0528307	-0.0658332	-3.74559	-1.83883	-0.101691
0.182	-0.087522	-0.0542761	-0.0672526	-3.74337	-1.83536	-0.103395
0.183	-0.0874355	-0.0546045	-0.0685992	-3.74071	-1.83146	-0.104601
0.184	-0.0872654	-0.0545426	-0.0691744	-3.73846	-1.82789	-0.10565
0.184	-0.0867477	-0.0548144	-0.0694468	-3.73548	-1.82536	-0.108437
0.185	-0.0872516	-0.0545996	-0.0685981	-3.73179	-1.82225	-0.109221
0.186	-0.0873937	-0.0547941	-0.0678587	-3.72814	-1.81894	-0.111163
0.186	-0.0863382	-0.0545952	-0.0681184	-3.72322	-1.81587	-0.111731
0.187	-0.0854312	-0.0541874	-0.0683073	-3.71855	-1.81239	-0.1131
0.188	-0.0849449	-0.0555318	-0.0683114	-3.71357	-1.80859	-0.115198
0.188	-0.0845285	-0.0571542	-0.0680032	-3.709	-1.80454	-0.116454
0.189	-0.0837752	-0.0581648	-0.0675649	-3.70407	-1.80098	-0.116576
0.19	-0.0832304	-0.058251	-0.0669332	-3.69937	-1.79811	-0.116897
0.19	-0.0822153	-0.0591267	-0.0656231	-3.69434	-1.79473	-0.116714
0.191	-0.0811369	-0.0597423	-0.0647729	-3.68953	-1.79081	-0.116243
0.192	-0.0803018	-0.0592076	-0.065013	-3.68434	-1.78712	-0.116228
0.192	-0.0790549	-0.0588554	-0.0655456	-3.67933	-1.78395	-0.117867
0.193	-0.0787876	-0.0580224	-0.0665275	-3.67491	-1.78067	-0.119256
0.194	-0.0784928	-0.056942	-0.0668452	-3.66957	-1.77668	-0.119803
0.194	-0.0771258	-0.0568693	-0.0669975	-3.66321	-1.77237	-0.118605
0.195	-0.0762238	-0.0569969	-0.0672591	-3.65692	-1.76773	-0.117917
0.196	-0.0765995	-0.0569569	-0.0665961	-3.64956	-1.76281	-0.118036
0.196	-0.0764827	-0.0567367	-0.0665443	-3.64239	-1.75696	-0.117306
0.197	-0.0755796	-0.0561765	-0.0658911	-3.63676	-1.75211	-0.116683
0.198	-0.0742623	-0.0552356	-0.0646267	-3.62899	-1.74636	-0.117554
0.198	-0.072646	-0.0543665	-0.0622641	-3.62268	-1.74124	-0.116246
0.199	-0.0734197	-0.0523888	-0.0604474	-3.61659	-1.73555	-0.115458
0.2	-0.072767	-0.0510569	-0.0595499	-3.60935	-1.73017	-0.115116
0.2	-0.0723789	-0.0491783	-0.0591553	-3.60278	-1.72341	-0.114442
0.201	-0.0720524	-0.0461482	-0.0579648	-3.59586	-1.71654	-0.114177
0.202	-0.0708903	-0.0438023	-0.0569306	-3.58915	-1.70882	-0.114691
0.202	-0.0700937	-0.0421031	-0.0567044	-3.58295	-1.70214	-0.114143
0.203	-0.0702458	-0.0399994	-0.0562944	-3.57701	-1.69479	-0.113968
0.204	-0.067638	-0.0368608	-0.0556268	-3.57061	-1.68642	-0.11281
0.204	-0.0654149	-0.0348592	-0.0545486	-3.56479	-1.67862	-0.111866
0.205	-0.0639946	-0.0324149	-0.053528	-3.55781	-1.67078	-0.111471
0.206	-0.0621563	-0.0307957	-0.0523928	-3.55033	-1.66299	-0.11056
0.206	-0.0606994	-0.029753	-0.050282	-3.54267	-1.65504	-0.110411
0.207	-0.0592701	-0.0279634	-0.047865	-3.53405	-1.64732	-0.109304
0.208	-0.0576872	-0.0252304	-0.0455688	-3.52632	-1.63827	-0.106841
0.208	-0.0557676	-0.0222563	-0.0436405	-3.51827	-1.6294	-0.105137
0.209	-0.0529726	-0.0191221	-0.0418131	-3.50938	-1.62099	-0.103372
0.21	-0.051312	-0.0172495	-0.0386724	-3.50031	-1.61135	-0.102815
0.21	-0.0478653	-0.0143189	-0.0347768	-3.49094	-1.60223	-0.10137
0.211	-0.0450988	-0.0102379	-0.0315267	-3.48051	-1.59298	-0.0989991
0.212	-0.0426508	-0.00669889	-0.0252038	-3.46832	-1.58305	-0.0959403
0.212	-0.0416038	-0.00119239	-0.0191044	-3.45541	-1.57224	-0.0933227
0.213	-0.0385686	0.0045948	-0.0138069	-3.44272	-1.5615	-0.0897709
0.214	-0.0344953	0.0106666	-0.0087693	-3.42942	-1.55062	-0.0866834
0.214	-0.0310706	0.0170252	-0.00343187	-3.41622	-1.53954	-0.0837476
0.215	-0.0272218	0.0237195	0.00204047	-3.40479	-1.52889	-0.0805977
0.216	-0.0218064	0.031747	0.00973955	-3.39154	-1.51668	-0.0763133
0.216	-0.0172496	0.0392002	0.0176712	-3.37853	-1.50377	-0.0705099
0.217	-0.0117818	0.0479245	0.0274107	-3.36409	-1.49137	-0.065395
0.218	-0.00557394	0.0573865	0.0362709	-3.34976	-1.47812	-0.059092
0.218	0.000947584	0.067439	0.0446689	-3.33484	-1.46314	-0.0527535
0.219	0.00815119	0.0784623	0.0527646	-3.31963	-1.44755	-0.0445897
0.22	0.0148221	0.0897727	0.0624993	-3.30501	-1.43191	-0.0370095
0.22	0.0233758	0.100122	0.0732348	-3.29042	-1.41481	-0.0297906
0.221	0.0317058	0.112647	0.0849259	-3.27466	-1.39768	-0.0208072
0.222	0.0407932	0.125949	0.097203	-3.25794	-1.38028	-0.0104932
0.222	0.0494621	0.138472	0.110013	-3.24152	-1.36118	-0.000621484
0.223	0.059198	0.151535	0.122977	-3.22523	-1.34213	0.00898913
0.224	0.0693171	0.166749	0.135195	-3.20869	-1.32415	0.0185216
0.224	0.0802609	0.181477	0.147699	-3.19224	-1.30605	0.0286218
0.225	0.0914633	0.196093	0.161608	-3.17469	-1.28765	0.0397849
0.226	0.103432	0.212149	0.174531	-3.15501	-1.2682	0.0528302
0.226	0.116113	0.229272	0.188811	-3.13664	-1.2483	0.0653221
0.227	0.128994	0.246321	0.202751	-3.11853	-1.22904	0.0778633
0.228	0.141482	0.264059	0.217426	-3.0999	-1.2096	0.0911601
0.228	0.154759	0.282488	0.232912	-3.08352	-1.18967	0.10427
0.229	0.168749	0.30117	0.24761	-3.06593	-1.16996	0.118813
0.23	0.182444	0.320488	0.264392	-3.0473	-1.15025	0.134035
0.23	0.197111	0.340417	0.280725	-3.0281	-1.12875	0.14823
0.231	0.211922	0.360026	0.296588	-3.00918	-1.10779	0.164274
0.232	0.226793	0.380353	0.313277	-2.99088	-1.08656	0.178955
0.232	0.243257	0.400046	0.329856	-2.97088	-1.06539	0.194224
0.233	0.259894	0.421505	0.346756	-2.95136	-1.04459	0.211091
0.234	0.277024	0.441765	0.36551	-2.93216	-1.02351	0.227626
0.234	0.295226	0.460347	0.384077	-2.91115	-1.0021	0.244203
0.235	0.312903	0.479371	0.401971	-2.88957	-0.980641	0.260789
0.236	0.330514	0.499534	0.422188	-2.8681	-0.959118	0.27834
0.236	0.348776	0.52054	0.442069	-2.84679	-0.938542	0.297875
0.237	0.365978	0.542457	0.462404	-2.82522	-0.917713	0.316121
0.238	0.383614	0.565374	0.483228	-2.80382	-0.897315	0.335029
0.238	0.401865	0.588223	0.50286	-2.78387	-0.876885	0.354033
0.239	0.420506	0.61144	0.523127	-2.76431	-0.854412	0.372973
0.24	0.438338	0.635847	0.542909	-2.74409	-0.832909	0.393575
0.24	0.456343	0.6609	0.561661	-2.72571	-0.812398	0.413773
0.241	0.475858	0.685142	0.58121	-2.70448	-0.792167	0.433641
0.242	0.495874	0.708472	0.600458	-2.68402	-0.771975	0.454389
0.242	0.514581	0.73237	0.62019	-2.66458	-0.750938	0.475129
0.243	0.533848	0.756112	0.638696	-2.64489	-0.731378	0.496672
0.244	0.552638	0.779109	0.656964	-2.62484	-0.711929	0.517144
0.244	0.572079	0.801918	0.676286	-2.60646	-0.693276	0.536837
0.245	0.59241	0.824438	0.692759	-2.58863	-0.6765	0.556871
0.246	0.613409	0.845881	0.710003	-2.57128	-0.659151	0.577506
0.246	0.633064	0.866846	0.727969	-2.55403	-0.6414	0.598044
0.247	0.652344	0.888257	0.746185	-2.53788	-0.623831	0.617866
0.248	0.670096	0.909578	0.764174	-2.5214	-0.606844	0.637134
0.248	0.686545	0.930203	0.780177	-2.50285	-0.58891	0.657995
0.249	0.701151	0.949544	0.794854	-2.48624	-0.572286	0.67749
0.25	0.716983	0.968918	0.810542	-2.4697	-0.556394	0.695774
0.25	0.733328	0.987921	0.824535	-2.45505	-0.541094	0.715177
0.251	0.749732	1.00548	0.838825	-2.44079	-0.52553	0.733405
0.252	0.766627	1.0222	0.8521	-2.42649	-0.511297	0.750101
0.252	0.782424	1.03757	0.86597	-2.4143	-0.498622	0.765969
0.253	0.799564	1.05261	0.879325	-2.40073	-0.486086	0.782464
0.254	0.813823	1.06774	0.890949	-2.38746	-0.475102	0.800331
0.254	0.828288	1.0819	0.901651	-2.37525	-0.463709	0.817863
0.255	0.842716	1.09524	0.9116	-2.36345	-0.454163	0.83392
0.256	0.857573	1.10885	0.921379	-2.35222	-0.444966	0.848862
0.256	0.872232	1.12122	0.932005	-2.34194	-0.43625	0.864227
0.257	0.884285	1.1319	0.941632	-2.33342	-0.42697	0.879707
0.258	0.895375	1.14268	0.950487	-2.32508	-0.418505	0.893884
0.258	0.907779	1.15356	0.959058	-2.31795	-0.410756	0.906545
0.259	0.919586	1.16369	0.967331	-2.31223	-0.403761	0.919092
0.26	0.929766	1.17228	0.974516	-2.30609	-0.397606	0.931836
0.26	0.940089	1.17992	0.982929	-2.29887	-0.391276	0.943165
0.261	0.950061	1.18721	0.990212	-2.29259	-0.385729	0.95273
0.262	0.959605	1.19352	0.995781	-2.28572	-0.381156	0.962693
0.262	0.970766	1.19901	1.00143	-2.27882	-0.376027	0.972764
0.263	0.980863	1.20355	1.00527	-2.27272	-0.372199	0.981068
0.264	0.988955	1.20716	1.00963	-2.26784	-0.369678	0.989168
0.264	0.998025	1.21085	1.0145	-2.26388	-0.366509	0.99656
0.265	1.00675	1.21409	1.01861	-2.25984	-0.364286	1.0037
0.266	1.01388	1.21718	1.02189	-2.25481	-0.362489	1.01064
0.266	1.02061	1.21915	1.02499	-2.25049	-0.360521	1.01645
0.267	1.02781	1.2211	1.02801	-2.24767	-0.358601	1.02189
0.268	1.03325	1.22305	1.03011	-2.24503	-0.356872	1.027
0.268	1.038	1.22479	1.03174	-2.24306	-0.355966	1.032
0.269	1.04367	1.22525	1.03306	-2.24123	-0.354231	1.03587
0.27	1.04855	1.22445	1.03316	-2.23882	-0.353834	1.03836
0.27	1.05305	1.22308	1.03387	-2.23732	-0.353447	1.04
0.271	1.05697	1.22182	1.03239	-2.23593	-0.352527	1.04161
0.272	1.06029	1.21976	1.03155	-2.23388	-0.350447	1.04346
0.272	1.06274	1.21702	1.03115	-2.23239	-0.351163	1.04546
0.273	1.06679	1.21453	1.03105	-2.23069	-0.353088	1.04703
0.274	1.07061	1.21113	1.0308	-2.22896	-0.352431	1.04751
0.274	1.07308	1.2085	1.02905	-2.22912	-0.351999	1.04774
0.275	1.07385	1.20617	1.02718	-2.22881	-0.35175	1.04731
0.276	1.07583	1.20239	1.0264	-2.22897	-0.352913	1.04627
0.276	1.07762	1.19799	1.02437	-2.22909	-0.354286	1.04467
0.277	1.07948	1.19461	1.02264	-2.22945	-0.354529	1.04241
0.278	1.08031	1.19101	1.02054	-2.22882	-0.356249	1.04144
0.278	1.08039	1.18613	1.01883	-2.22822	-0.357047	1.0405
0.279	1.07914	1.18142	1.01743	-2.22856	-0.359362	1.03863
0.28	1.07841	1.17738	1.01571	-2.22852	-0.361632	1.03603
0.28	1.07736	1.17225	1.0134	-2.2286	-0.36292	1.03385
0.281	1.0779	1.16707	1.00995	-2.22884	-0.364119	1.03197
0.282	1.0785	1.1617	1.00814	-2.23025	-0.367085	1.02988
0.282	1.07833	1.15595	1.00656	-2.23186	-0.369296	1.0273
0.283	1.07785	1.14984	1.00344	-2.23395	-0.371276	1.02432
0.284	1.07781	1.14314	1.00041	-2.23666	-0.373658	1.02076
0.284	1.07744	1.13639	0.99665	-2.23935	-0.375766	1.01636
0.285	1.07657	1.12915	0.993485	-2.24125	-0.379332	1.01151
0.286	1.0746	1.12326	0.990109	-2.24322	-0.382098	1.00627
0.286	1.0721	1.11741	0.986918	-2.24617	-0.384781	1.00091
0.287	1.07003	1.11139	0.983563	-2.24838	-0.38662	0.995263
0.288	1.06811	1.10625	0.98028	-2.25064	-0.390302	0.990111
0.288	1.06582	1.10104	0.976304	-2.25389	-0.393714	0.985178
0.289	1.06338	1.09482	0.973975	-2.25691	-0.397497	0.980329
0.29	1.062	1.08789	0.968495	-2.25971	-0.401214	0.974953
0.29	1.06051	1.08119	0.964568	-2.26267	-0.405326	0.969683
0.291	1.05967	1.07438	0.960257	-2.26545	-0.409395	0.964535
0.292	1.0564	1.06769	0.955089	-2.26758	-0.412373	0.959685
0.292	1.05336	1.06066	0.951042	-2.26844	-0.416469	0.953323
0.293	1.05068	1.05379	0.94541	-2.26889	-0.420564	0.947313
0.294	1.04646	1.0467	0.940353	-2.27049	-0.425298	0.941259
0.294	1.04382	1.03932	0.934897	-2.27234	-0.428503	0.935284
0.295	1.04073	1.03242	0.929366	-2.27344	-0.431536	0.928413
0.296	1.03659	1.02611	0.923492	-2.27587	-0.434435	0.921532
0.296	1.03368	1.01986	0.919199	-2.27787	-0.436993	0.915004
0.297	1.03075	1.0138	0.912341	-2.28129	-0.439673	0.908567
0.298	1.02689	1.00715	0.907074	-2.28389	-0.441968	0.902835
0.298	1.02288	0.999676	0.901641	-2.28538	-0.443416	0.896374
0.299	1.01905	0.992053	0.896771	-2.28813	-0.444498	0.890003
0.3	1.01545	0.984657	0.891633	-2.29096	-0.44651	0.883763
0.3	1.01136	0.977234	0.886573	-2.29201	-0.448889	0.878096
0.301	1.0066	0.969692	0.881861	-2.29463	-0.45159	0.872388
0.302	1.00177	0.962885	0.878294	-2.29684	-0.454076	0.866343
0.302	0.998487	0.955492	0.873619	-2.29981	-0.457274	0.860222
0.303	0.994625	0.949455	0.869263	-2.3017	-0.458669	0.854723
0.304	0.989206	0.942987	0.862381	-2.30252	-0.461209	0.849641
0.304	0.983909	0.936026	0.858437	-2.3047	-0.464962	0.843569
0.305	0.979433	0.929949	0.853639	-2.30717	-0.468992	0.837844
0.306	0.973994	0.924	0.847838	-2.30913	-0.47334	0.831643
0.306	0.967864	0.917438	0.842087	-2.31008	-0.476519	0.824883
0.307	0.960673	0.910537	0.839457	-2.31229	-0.480184	0.818187
0.307	0.954689	0.903616	0.835719	-2.31369	-0.483775	0.811582
0.308	0.949776	0.896295	0.831644	-2.31598	-0.485977	0.804933
0.309	0.944066	0.888971	0.824915	-2.31855	-0.488579	0.798403
0.309	0.937741	0.882181	0.818422	-2.32032	-0.491496	0.792272
0.31	0.931436	0.875926	0.81148	-2.32168	-0.494737	0.786904
0.311	0.925021	0.869473	0.804531	-2.32344	-0.497479	0.781147
0.311	0.920047	0.863719	0.798818	-2.32552	-0.500738	0.773413
0.312	0.915066	0.857572	0.79261	-2.3268	-0.502455	0.765915
0.313	0.909475	0.85112	0.785682	-2.32711	-0.505154	0.758585
0.313	0.903529	0.845016	0.779858	-2.32807	-0.508522	0.751877
0.314	0.897008	0.839014	0.773789	-2.33002	-0.510343	0.745466
0.315	0.889373	0.832388	0.768982	-2.33158	-0.510218	0.738705
0.315	0.881992	0.82617	0.764463	-2.33341	-0.511548	0.731649
0.316	0.876361	0.820387	0.759414	-2.33472	-0.513127	0.72448
0.317	0.868975	0.814828	0.754537	-2.33474	-0.514612	0.717471
0.317	0.86124	0.809027	0.748988	-2.33433	-0.515162	0.710382
0.318	0.854941	0.803387	0.743487	-2.33668	-0.515375	0.703403
0.319	0.850022	0.797803	0.73756	-2.33686	-0.515584	0.697366
0.319	0.844088	0.791744	0.730674	-2.33673	-0.516757	0.692012
0.32	0.837579	0.78543	0.724053	-2.33847	-0.519286	0.68689
0.321	0.832024	0.778751	0.718148	-2.33856	-0.520375	0.680918
0.321	0.825842	0.772432	0.71232	-2.33924	-0.520948	0.675044
0.322	0.818611	0.766976	0.705025	-2.33954	-0.521301	0.669822
0.323	0.810345	0.761481	0.698981	-2.33895	-0.522018	0.664281
0.323	0.80424	0.755866	0.693759	-2.33736	-0.523438	0.658237
0.324	0.796281	0.74974	0.688505	-2.33634	-0.523666	0.652256
0.325	0.78959	0.743572	0.683643	-2.33682	-0.524618	0.64603
0.325	0.782947	0.737241	0.678748	-2.33731	-0.524322	0.639986
0.326	0.776899	0.730944	0.674104	-2.33823	-0.523762	0.634183
0.327	0.772137	0.725395	0.668162	-2.33892	-0.522609	0.628276
0.327	0.765899	0.719934	0.662254	-2.33921	-0.522497	0.62337
0.328	0.759567	0.714295	0.657614	-2.33962	-0.522554	0.61813
0.329	0.753456	0.70831	0.654249	-2.34024	-0.523722	0.612578
0.329	0.746761	0.701961	0.649685	-2.34158	-0.525117	0.607494
0.33	0.739769	0.695596	0.646469	-2.3406	-0.524568	0.602541
0.331	0.733913	0.690059	0.641682	-2.34038	-0.524937	0.597272
0.331	0.72738	0.685099	0.636746	-2.34071	-0.524853	0.592674
0.332	0.72305	0.680515	0.632519	-2.34132	-0.525205	0.588458
0.333	0.71712	0.675961	0.627412	-2.34195	-0.524231	0.583497
0.333	0.710993	0.670977	0.622416	-2.34237	-0.523834	0.578074
0.334	0.706769	0.665134	0.617352	-2.34164	-0.523772	0.57234
0.335	0.702074	0.658996	0.611375	-2.33987	-0.523589	0.566461
0.335	0.695657	0.653528	0.605914	-2.33749	-0.523943	0.56079
0.336	0.690393	0.648449	0.601153	-2.33673	-0.524686	0.554789
0.337	0.686259	0.643411	0.598091	-2.33798	-0.523542	0.548559
0.337	0.682235	0.637968	0.593942	-2.3378	-0.522095	0.543029
0.338	0.675976	0.632608	0.588129	-2.33688	-0.521722	0.5379
0.339	0.670896	0.627679	0.58369	-2.33645	-0.52027	0.532816
0.339	0.665817	0.622391	0.578506	-2.33635	-0.519235	0.527884
0.34	0.662816	0.617275	0.571951	-2.33613	-0.517224	0.522445
0.341	0.658292	0.612918	0.566163	-2.33647	-0.516655	0.517342
0.341	0.65307	0.609097	0.56143	-2.33661	-0.515993	0.511942
0.342	0.648406	0.605729	0.5581	-2.3358	-0.51495	0.506173
0.343	0.643018	0.60205	0.555814	-2.33528	-0.513239	0.500555
0.343	0.638552	0.597295	0.554086	-2.33483	-0.511568	0.495203
0.344	0.635095	0.592267	0.55139	-2.33439	-0.510163	0.490589
0.345	0.629893	0.58689	0.547509	-2.33365	-0.508586	0.486268
0.345	0.624605	0.581899	0.543233	-2.33345	-0.508911	0.482614
0.346	0.619858	0.577155	0.53939	-2.33333	-0.507765	0.479458
0.347	0.615927	0.572418	0.534903	-2.33319	-0.506114	0.47538
0.347	0.612471	0.567277	0.531214	-2.33269	-0.505704	0.470461
0.348	0.609832	0.563291	0.526594	-2.33159	-0.506335	0.465543
0.349	0.606821	0.559098	0.52129	-2.33058	-0.506691	0.460727
0.349	0.602841	0.554506	0.518078	-2.3292	-0.507415	0.456564
0.35	0.599097	0.549969	0.513621	-2.32786	-0.506652	0.451936
0.351	0.595677	0.545384	0.51069	-2.32614	-0.507122	0.447637
0.351	0.591798	0.540972	0.507237	-2.32331	-0.506578	0.44321
0.352	0.586848	0.537445	0.503798	-2.32247	-0.506195	0.43858
0.353	0.581805	0.533196	0.500406	-2.32203	-0.506084	0.434102
0.353	0.577032	0.529624	0.496796	-2.32085	-0.505416	0.429139
0.354	0.571686	0.526312	0.493393	-2.31927	-0.504658	0.424522
0.355	0.567284	0.522508	0.490584	-2.31747	-0.504187	0.41949
0.355	0.565149	0.517936	0.487616	-2.31588	-0.503867	0.414794
0.356	0.561666	0.513527	0.484245	-2.31469	-0.502298	0.409865
0.357	0.557333	0.509229	0.480532	-2.31354	-0.50137	0.404928
0.357	0.553409	0.505016	0.476566	-2.31271	-0.500823	0.400745
0.358	0.549708	0.500883	0.472819	-2.31108	-0.500114	0.397802
0.359	0.545504	0.496913	0.467878	-2.30989	-0.499968	0.39451
0.359	0.541322	0.493298	0.464206	-2.30704	-0.501557	0.38984
0.36	0.537522	0.489292	0.460875	-2.30639	-0.50239	0.385837
0.361	0.532811	0.486457	0.457149	-2.306	-0.502451	0.381774
0.361	0.52786	0.482847	0.453091	-2.30521	-0.502552	0.377853
0.362	0.523939	0.479756	0.448482	-2.30463	-0.501907	0.373946
0.363	0.520568	0.476962	0.444903	-2.30407	-0.501522	0.37098
0.363	0.516697	0.474051	0.440963	-2.30315	-0.501527	0.368486
0.364	0.51263	0.471234	0.438571	-2.30233	-0.500714	0.365522
0.365	0.508623	0.467905	0.435494	-2.30094	-0.50101	0.361936
0.365	0.503356	0.464414	0.43217	-2.29931	-0.500885	0.35751
0.366	0.498042	0.460663	0.429639	-2.29772	-0.500872	0.353512
0.367	0.493256	0.45756	0.427008	-2.29675	-0.500195	0.349733
0.367	0.48803	0.454741	0.424508	-2.2971	-0.49923	0.346205
0.368	0.483751	0.451897	0.423076	-2.29805	-0.49823	0.343276
0.369	0.479784	0.449047	0.419639	-2.29846	-0.49708	0.339713
0.369	0.475076	0.445945	0.417075	-2.29903	-0.496083	0.33674
0.37	0.470542	0.44271	0.414119	-2.29816	-0.49568	0.334348
0.371	0.466078	0.43973	0.411024	-2.2973	-0.495627	0.332388
0.371	0.462477	0.437397	0.408687	-2.29635	-0.494951	0.329434
0.372	0.459239	0.433949	0.406279	-2.29659	-0.49419	0.326301
0.373	0.455798	0.430909	0.404095	-2.29587	-0.49334	0.32358
0.373	0.452282	0.427976	0.40164	-2.29508	-0.493337	0.322301
0.374	0.448915	0.425398	0.398198	-2.29418	-0.493195	0.32119
0.375	0.445559	0.422733	0.39465	-2.29241	-0.493044	0.319074
0.375	0.441147	0.4197	0.391112	-2.29038	-0.492095	0.318385
0.376	0.437441	0.41747	0.387586	-2.28874	-0.490644	0.316461
0.377	0.433113	0.413993	0.383785	-2.28764	-0.489948	0.314456
0.377	0.429307	0.411128	0.379633	-2.28748	-0.490009	0.311372
0.378	0.42503	0.408817	0.375757	-2.28613	-0.489594	0.309267
0.379	0.421873	0.406676	0.372832	-2.28441	-0.489206	0.306582
0.379	0.419698	0.404118	0.370223	-2.28369	-0.488283	0.303257
0.38	0.416609	0.401799	0.367406	-2.28323	-0.486919	0.300728
0.381	0.413011	0.3993	0.364406	-2.2825	-0.487502	0.298409
0.381	0.40945	0.39667	0.361175	-2.28224	-0.488173	0.295345
0.382	0.406534	0.394928	0.357867	-2.28128	-0.486996	0.292452
0.383	0.402458	0.391983	0.353793	-2.27944	-0.485712	0.29011
0.383	0.399023	0.388461	0.350184	-2.27874	-0.486295	0.28749
0.384	0.395998	0.385941	0.347007	-2.27866	-0.486395	0.285558
0.385	0.393134	0.383601	0.343507	-2.27869	-0.486946	0.283732
0.385	0.389784	0.380492	0.339888	-2.27758	-0.488625	0.282323
0.386	0.386862	0.3775	0.33721	-2.27577	-0.489199	0.280104
0.387	0.384916	0.374899	0.335248	-2.2742	-0.489159	0.278224
0.387	0.382487	0.372679	0.332383	-2.27318	-0.489404	0.276707
0.388	0.379416	0.370381	0.329005	-2.27231	-0.488528	0.274498
0.389	0.376042	0.368895	0.326253	-2.27158	-0.48845	0.271309
0.389	0.373129	0.367515	0.323936	-2.27128	-0.489185	0.269162
0.39	0.37066	0.365675	0.321134	-2.27097	-0.488353	0.268475
0.391	0.368287	0.363997	0.319021	-2.2706	-0.487554	0.266496
0.391	0.366376	0.362441	0.316521	-2.26998	-0.487409	0.26356
0.392	0.364758	0.360485	0.314688	-2.26915	-0.486745	0.261652
0.393	0.361712	0.358505	0.313409	-2.26916	-0.48549	0.260183
0.393	0.358353	0.356341	0.311858	-2.268	-0.484677	0.258142
0.394	0.35688	0.352699	0.310053	-2.26535	-0.484481	0.256452
0.395	0.355314	0.349788	0.308064	-2.2634	-0.48363	0.254816
0.395	0.352686	0.347723	0.305681	-2.26069	-0.482675	0.253117
0.396	0.349823	0.345009	0.303474	-2.25759	-0.481274	0.250713
0.397	0.348973	0.342401	0.301742	-2.25498	-0.481612	0.248757
0.397	0.346613	0.339424	0.299424	-2.25305	-0.481665	0.247389
0.398	0.345284	0.336853	0.297044	-2.25138	-0.480444	0.246031
0.399	0.343601	0.335498	0.294905	-2.24964	-0.48099	0.245328
0.399	0.341627	0.333095	0.29276	-2.2483	-0.481448	0.244492
0.4	0.338995	0.330255	0.289796	-2.2468	-0.48097	0.243204
0.401	0.33718	0.327228	0.286617	-2.24467	-0.480167	0.241314
0.401	0.335083	0.32551	0.283708	-2.24208	-0.479649	0.239563
0.402	0.331814	0.322914	0.282069	-2.23961	-0.480198	0.237971
0.403	0.329887	0.320716	0.2805	-2.23693	-0.48007	0.236988
0.403	0.327796	0.318825	0.277791	-2.23364	-0.480167	0.235415
0.404	0.326847	0.318672	0.275119	-2.23052	-0.479249	0.232769
0.405	0.324552	0.316639	0.273108	-2.22794	-0.479519	0.230285
0.405	0.322627	0.314208	0.271533	-2.22438	-0.479485	0.229152
0.406	0.320102	0.313299	0.269589	-2.22181	-0.479255	0.227079
0.407	0.317343	0.312025	0.268084	-2.21936	-0.478616	0.22366
0.407	0.314297	0.310936	0.267183	-2.21634	-0.477412	0.220456
0.408	0.312034	0.309432	0.265967	-2.21292	-0.476101	0.21776
0.409	0.310924	0.308474	0.264263	-2.2106	-0.475547	0.21503
0.409	0.309694	0.306316	0.261715	-2.20902	-0.475475	0.213213
0.41	0.308683	0.305516	0.259658	-2.20747	-0.47556	0.211957
0.411	0.307333	0.304638	0.257854	-2.20592	-0.474614	0.211226
0.411	0.305453	0.302233	0.256195	-2.20556	-0.472646	0.209517
0.412	0.303013	0.300374	0.253674	-2.20485	-0.471285	0.207946
0.413	0.29981	0.298295	0.250613	-2.20424	-0.470675	0.207055
0.413	0.297036	0.295859	0.248248	-2.2029	-0.470726	0.205268
0.414	0.294647	0.294096	0.24639	-2.20071	-0.469759	0.202942
0.415	0.2923	0.292289	0.244626	-2.19949	-0.467224	0.202117
0.415	0.289982	0.290161	0.243896	-2.19821	-0.465432	0.200499
0.416	0.287523	0.290648	0.243515	-2.19677	-0.464239	0.199028
0.417	0.285117	0.290528	0.242348	-2.19564	-0.462076	0.197154
0.417	0.282729	0.29091	0.239702	-2.19442	-0.4599	0.196379
0.418	0.280843	0.289011	0.237555	-2.19385	-0.457601	0.196553
0.419	0.279886	0.287481	0.237567	-2.19301	-0.455587	0.194583
0.419	0.279443	0.285374	0.235539	-2.19143	-0.453012	0.192784
0.42	0.278827	0.284194	0.233687	-2.1894	-0.450664	0.190647
0.421	0.277487	0.282237	0.232778	-2.18759	-0.448135	0.188172
0.421	0.275859	0.280384	0.23226	-2.18585	-0.446321	0.18493
0.422	0.273904	0.278765	0.231553	-2.18389	-0.444258	0.184698
0.423	0.271627	0.276877	0.230711	-2.1818	-0.441864	0.182896
0.423	0.269634	0.275207	0.229883	-2.17941	-0.439153	0.178964
0.424	0.268172	0.273496	0.228994	-2.17719	-0.437155	0.175975
0.425	0.266776	0.271436	0.22836	-2.17619	-0.435825	0.174319
0.425	0.265032	0.270222	0.227873	-2.17495	-0.434035	0.171325
0.426	0.263429	0.268816	0.226552	-2.17315	-0.43162	0.170291
0.427	0.261842	0.266676	0.225253	-2.17179	-0.428999	0.168135
0.427	0.259648	0.265901	0.223992	-2.17082	-0.42662	0.165324
0.428	0.257273	0.264796	0.224462	-2.16944	-0.424952	0.163295
0.429	0.255662	0.26345	0.224353	-2.16821	-0.423706	0.161596
0.429	0.254641	0.26227	0.223535	-2.16707	-0.422061	0.15964
0.43	0.253326	0.260479	0.222038	-2.166	-0.42011	0.156894
0.431	0.252331	0.258809	0.22079	-2.16395	-0.418934	0.154667
0.431	0.251302	0.257517	0.219881	-2.16211	-0.418031	0.151314
0.432	0.250215	0.255847	0.218265	-2.16027	-0.416376	0.148934
0.433	0.249628	0.255588	0.217181	-2.15725	-0.414081	0.145444
0.433	0.249681	0.255169	0.216699	-2.15425	-0.413197	0.143672
0.434	0.248842	0.254851	0.216074	-2.15229	-0.412563	0.142258
0.435	0.246846	0.253125	0.215279	-2.15076	-0.411787	0.140543
0.435	0.245997	0.252467	0.214241	-2.1482	-0.409738	0.138687
0.436	0.244901	0.250677	0.212871	-2.14577	-0.40754	0.136951
0.437	0.242694	0.248945	0.2117	-2.14411	-0.40498	0.135335
0.437	0.239804	0.247366	0.211074	-2.14198	-0.403533	0.132822
0.438	0.237779	0.245772	0.210404	-2.13924	-0.401438	0.13197
0.439	0.237072	0.244926	0.209453	-2.13689	-0.399067	0.129889
0.439	0.236714	0.242096	0.20755	-2.13532	-0.397234	0.128134
0.44	0.236023	0.240788	0.205664	-2.13348	-0.396001	0.12766
0.441	0.234847	0.23837	0.204797	-2.1315	-0.394961	0.127237
0.441	0.23358	0.236107	0.204148	-2.1295	-0.393841	0.125458
0.442	0.232358	0.233745	0.203681	-2.12778	-0.392613	0.12416
0.443	0.231631	0.23161	0.203689	-2.12514	-0.391879	0.122903
0.443	0.230989	0.230326	0.203086	-2.12219	-0.389773	0.121215
0.444	0.229002	0.228281	0.201614	-2.11951	-0.388651	0.118337
0.445	0.22772	0.226871	0.200774	-2.11634	-0.388224	0.116994
0.445	0.226868	0.225465	0.200336	-2.11274	-0.387116	0.116457
0.446	0.225725	0.225401	0.200659	-2.10944	-0.384892	0.11447
0.447	0.224685	0.22418	0.200348	-2.10522	-0.381335	0.112975
0.447	0.224022	0.222735	0.199431	-2.1014	-0.378882	0.111594
0.448	0.222969	0.222245	0.198326	-2.09754	-0.377971	0.110655
0.449	0.222051	0.220296	0.197095	-2.09319	-0.376928	0.109694
0.449	0.221299	0.217422	0.195816	-2.09077	-0.376108	0.108326
0.45	0.220368	0.21554	0.194911	-2.08794	-0.375953	0.107384
0.451	0.219635	0.212845	0.194899	-2.08402	-0.375784	0.104522
0.451	0.218112	0.212173	0.195555	-2.08017	-0.374616	0.10133
0.452	0.216193	0.211712	0.19492	-2.07637	-0.372829	0.0993925
0.453	0.214013	0.211984	0.19402	-2.07328	-0.372085	0.097095
0.453	0.211745	0.210684	0.193937	-2.07076	-0.372249	0.0955314
0.454	0.210956	0.209442	0.193298	-2.0687	-0.37287	0.0943436
0.455	0.210783	0.20998	0.192903	-2.06673	-0.372061	0.093785
0.455	0.210542	0.210032	0.191982	-2.06421	-0.371682	0.0918143
0.456	0.211249	0.2097	0.191136	-2.06136	-0.370564	0.0906702
0.457	0.210934	0.209647	0.190157	-2.05894	-0.369972	0.0901624
0.457	0.209136	0.209242	0.188944	-2.05666	-0.369428	0.0886533
0.458	0.207646	0.209296	0.187865	-2.05367	-0.369117	0.0875669
0.459	0.206924	0.208202	0.18654	-2.05044	-0.368496	0.0851833
0.459	0.206062	0.207439	0.185208	-2.0477	-0.367561	0.0831575
0.46	0.205671	0.207338	0.18463	-2.04468	-0.36667	0.0823118
0.461	0.205551	0.206673	0.183673	-2.0419	-0.365626	0.0800314
0.461	0.205373	0.207257	0.181717	-2.03948	-0.36429	0.0779996
0.462	0.203837	0.207318	0.180222	-2.03717	-0.363017	0.0764912
0.463	0.201976	0.207646	0.180035	-2.03508	-0.361876	0.075065
0.463	0.199954	0.209068	0.180128	-2.03277	-0.360795	0.072973
0.464	0.197359	0.210429	0.179509	-2.03035	-0.359969	0.0712112
0.465	0.194818	0.210437	0.178584	-2.02759	-0.359287	0.0705722
0.465	0.192239	0.210363	0.177613	-2.02472	-0.358002	0.0690902
0.466	0.188822	0.209198	0.17601	-2.02207	-0.357039	0.0678934
0.467	0.18524	0.208505	0.174557	-2.01987	-0.356437	0.0657966
0.467	0.182938	0.20729	0.173594	-2.01777	-0.355786	0.0636419
0.468	0.181601	0.207966	0.172333	-2.01509	-0.355456	0.0616998
0.469	0.18045	0.208525	0.170814	-2.01329	-0.355304	0.0602282
0.469	0.179938	0.207876	0.169236	-2.01162	-0.355457	0.0576846
0.47	0.1805	0.208522	0.168155	-2.00881	-0.355838	0.0556887
0.471	0.181455	0.208005	0.166685	-2.00773	-0.355441	0.0550285
0.471	0.182393	0.206737	0.164564	-2.00779	-0.354091	0.0549704
0.472	0.182576	0.205917	0.162854	-2.00718	-0.353329	0.0543614
0.473	0.181562	0.206169	0.161656	-2.00595	-0.353075	0.0545108
0.473	0.18069	0.20514	0.160462	-2.00436	-0.352507	0.0538088
0.474	0.180599	0.203447	0.159283	-2.00347	-0.352038	0.0523155
0.475	0.180942	0.201475	0.157895	-2.0027	-0.351294	0.0519265
0.475	0.179783	0.200196	0.155888	-2.00107	-0.350577	0.0515247
0.476	0.177919	0.198798	0.154198	-1.99966	-0.349901	0.0496431
0.477	0.176076	0.196762	0.153049	-1.99836	-0.349549	0.047987
0.477	0.175502	0.195306	0.152335	-1.99588	-0.349142	0.0477655
0.478	0.175037	0.193822	0.151641	-1.99328	-0.348628	0.0462096
0.479	0.17389	0.192471	0.150971	-1.99202	-0.348658	0.0440686
0.479	0.1727	0.189648	0.14909	-1.99043	-0.34923	0.0432174
0.48	0.171398	0.188681	0.14769	-1.98895	-0.350866	0.041969
0.48	0.170231	0.186979	0.147145	-1.98788	-0.352698	0.0406206
0.481	0.169116	0.185191	0.146814	-1.98708	-0.353475	0.0384166
0.482	0.168212	0.184345	0.146621	-1.9852	-0.353419	0.036829
0.482	0.166941	0.182829	0.146434	-1.98216	-0.352698	0.0356616
0.483	0.166281	0.181248	0.145932	-1.97981	-0.351831	0.0342908
0.484	0.165114	0.179834	0.145467	-1.97826	-0.351107	0.0339772
0.484	0.164061	0.178238	0.144978	-1.9765	-0.350946	0.0337805
0.485	0.163454	0.176115	0.143202	-1.97393	-0.350693	0.0340423
0.486	0.16238	0.17468	0.142157	-1.97179	-0.350138	0.0341883
0.486	0.161596	0.17235	0.14114	-1.96967	-0.348938	0.0334049
0.487	0.160374	0.172613	0.140391	-1.96674	-0.347209	0.0329315
0.488	0.158735	0.170324	0.138195	-1.96327	-0.345638	0.0319419
0.488	0.15705	0.167657	0.137373	-1.96061	-0.344555	0.0306607
0.489	0.154903	0.165198	0.137272	-1.95826	-0.344463	0.0301147
0.49	0.153029	0.162013	0.135467	-1.95544	-0.344149	0.0286707
0.49	0.15177	0.160819	0.134417	-1.95269	-0.342736	0.0285945
0.491	0.15058	0.160108	0.133692	-1.95003	-0.340868	0.0277443
0.492	0.149511	0.158035	0.132812	-1.9477	-0.339748	0.0287464
0.492	0.148775	0.157483	0.132748	-1.94577	-0.339006	0.0286201
0.493	0.147933	0.155247	0.131601	-1.94388	-0.338274	0.028753
0.494	0.146459	0.153519	0.130243	-1.94184	-0.338164	0.0298274
0.494	0.145087	0.151385	0.12904	-1.9398	-0.338031	0.0302779
0.495	0.14409	0.14978	0.128841	-1.93745	-0.33814	0.0297325
0.496	0.143357	0.148942	0.12717	-1.93407	-0.338101	0.0291539
0.496	0.142631	0.147221	0.124626	-1.93126	-0.337024	0.0292759
0.497	0.14142	0.14431	0.12305	-1.92822	-0.335292	0.0289359
0.498	0.139477	0.142247	0.121822	-1.92505	-0.33392	0.0292565
0.498	0.13836	0.139179	0.120153	-1.92241	-0.333176	0.0286998
0.499	0.138422	0.137807	0.118846	-1.92012	-0.33273	0.0289326
0.5	0.138348	0.136277	0.118119	-1.91841	-0.331733	0.0276574
0.5	0.137101	0.135405	0.117763	-1.91527	-0.330526	0.0278018
0.501	0.135895	0.132842	0.117108	-1.91111	-0.329232	0.0281143
0.502	0.134882	0.131278	0.116329	-1.90759	-0.328858	0.0275921
0.502	0.133569	0.129401	0.115304	-1.90415	-0.328353	0.0282615
0.503	0.132259	0.12738	0.114408	-1.90151	-0.327471	0.0265269
0.504	0.130515	0.125325	0.113565	-1.89873	-0.327206	0.0248018
0.504	0.128339	0.123423	0.113375	-1.89428	-0.326937	0.0232119
0.505	0.126387	0.122316	0.113891	-1.89086	-0.325769	0.0212646
0.506	0.125068	0.121164	0.113618	-1.88626	-0.324068	0.0197611
0.506	0.123996	0.119747	0.113604	-1.88237	-0.323003	0.0187456
0.507	0.121884	0.119602	0.111836	-1.87745	-0.321931	0.0180525
0.508	0.119993	0.120167	0.109696	-1.87248	-0.321401	0.0165724
0.508	0.119352	0.120287	0.108998	-1.86869	-0.320848	0.0146361
0.509	0.119277	0.119853	0.108203	-1.8648	-0.320122	0.0137914
0.51	0.118407	0.119001	0.107874	-1.86087	-0.319721	0.0131838
0.51	0.117294	0.118255	0.10807	-1.85761	-0.320008	0.0114732
0.511	0.116551	0.11756	0.107916	-1.854	-0.320432	0.0107007
0.512	0.115533	0.116926	0.107225	-1.84957	-0.319852	0.00919011
0.512	0.114916	0.116533	0.106934	-1.84566	-0.318421	0.00720696
0.513	0.113836	0.115598	0.107134	-1.84301	-0.317032	0.00697291
0.514	0.111859	0.114971	0.107519	-1.83987	-0.315915	0.0063944
0.514	0.109975	0.113499	0.106546	-1.83576	-0.314917	0.00596277
0.515	0.108649	0.112518	0.105198	-1.83221	-0.314541	0.00511923
0.516	0.107397	0.111444	0.103771	-1.82945	-0.31437	0.00377746
0.516	0.106027	0.110934	0.103266	-1.82575	-0.313526	0.00281564
0.517	0.105493	0.110558	0.102878	-1.82217	-0.311647	0.00233813
0.518	0.105002	0.110428	0.101995	-1.81848	-0.31049	3.24255e-05
0.518	0.104133	0.109454	0.101055	-1.81544	-0.309894	-0.000850454
0.519	0.104253	0.107947	0.100023	-1.81244	-0.308477	-0.00139988
0.52	0.102573	0.108684	0.0991238	-1.80906	-0.306506	-0.00202291
0.52	0.101882	0.107382	0.0982348	-1.80569	-0.305922	-0.00272501
0.521	0.101303	0.106263	0.0973294	-1.80294	-0.3071	-0.00251238
0.522	0.100582	0.10502	0.0955909	-1.79988	-0.307594	-0.00174659
0.522	0.101364	0.104503	0.0933196	-1.79609	-0.306501	-0.00186646
0.523	0.101623	0.105178	0.09265	-1.79224	-0.305244	-0.0016599
0.524	0.101578	0.105009	0.0929043	-1.78906	-0.305215	-0.00215211
0.524	0.101114	0.103411	0.092602	-1.78618	-0.305309	-0.00185297
0.525	0.0996273	0.102597	0.0926901	-1.78276	-0.30526	-0.00198225
0.526	0.0985376	0.101617	0.0927885	-1.77909	-0.306231	-0.00285116
0.526	0.0970551	0.101186	0.0923362	-1.77513	-0.307159	-0.00432547
0.527	0.0958156	0.100635	0.0922288	-1.77129	-0.306895	-0.00476837
0.528	0.0959208	0.100165	0.0919983	-1.76771	-0.30624	-0.00577308
0.528	0.0946214	0.099091	0.0914292	-1.76481	-0.30514	-0.00622683
0.529	0.0939788	0.0962495	0.0912453	-1.76297	-0.303865	-0.00664088
0.53	0.0931747	0.093568	0.0912263	-1.75981	-0.302951	-0.00717571
0.53	0.0926248	0.092272	0.0901547	-1.7567	-0.302445	-0.00807723
0.531	0.0932389	0.09127	0.0902288	-1.75431	-0.301586	-0.00899919
0.532	0.093165	0.0914142	0.0915242	-1.75191	-0.301112	-0.00975759
0.532	0.0934026	0.0909993	0.0926018	-1.75011	-0.300287	-0.0105714
0.533	0.0927811	0.0899796	0.0915785	-1.74734	-0.299553	-0.00979662
0.534	0.092831	0.0894576	0.0907732	-1.74499	-0.299016	-0.00977489
0.534	0.0935048	0.0890645	0.0894089	-1.743	-0.297783	-0.0103059
0.535	0.0935737	0.0884868	0.0876791	-1.74082	-0.295976	-0.010739
0.536	0.0920703	0.0882797	0.0880221	-1.73757	-0.293347	-0.0116201
0.536	0.0898225	0.0876635	0.0885829	-1.73462	-0.290776	-0.011176
0.537	0.0878114	0.0859474	0.0885548	-1.73214	-0.28869	-0.0104922
0.538	0.0863174	0.084928	0.0894587	-1.72988	-0.287696	-0.0104089
0.538	0.0847957	0.0833874	0.0881347	-1.72739	-0.287308	-0.00986586
0.539	0.0840312	0.0815467	0.0880042	-1.72565	-0.286629	-0.0102682
0.54	0.0830526	0.0811285	0.0873938	-1.72274	-0.285999	-0.0104801
0.54	0.0830478	0.0797495	0.0884477	-1.72063	-0.28544	-0.0113379
0.541	0.082294	0.0781095	0.0892184	-1.71882	-0.283941	-0.0118568
0.542	0.0807841	0.0774273	0.0890853	-1.71665	-0.281838	-0.0119933
0.542	0.0795357	0.0764271	0.0891406	-1.71368	-0.280426	-0.0128556
0.543	0.0784228	0.07544	0.0887475	-1.71038	-0.279333	-0.0133648
0.544	0.0779132	0.0749002	0.0879396	-1.70746	-0.277798	-0.0122997
0.544	0.0778484	0.0748976	0.0874744	-1.70521	-0.276648	-0.0130175
0.545	0.0780427	0.0754339	0.0876185	-1.70344	-0.275851	-0.0128265
0.546	0.0774783	0.0756604	0.0886644	-1.70003	-0.274899	-0.0120728
0.546	0.0766713	0.0752186	0.0885345	-1.69712	-0.273888	-0.0121529
0.547	0.076909	0.0751724	0.0868319	-1.69356	-0.27235	-0.0124676
0.548	0.0773481	0.0755786	0.0873406	-1.69083	-0.270458	-0.0124841
0.548	0.0765999	0.0754567	0.0875961	-1.68859	-0.268475	-0.011723
0.549	0.0764994	0.0747794	0.0881954	-1.68593	-0.266851	-0.0111275
0.55	0.0762475	0.0738177	0.0886247	-1.68446	-0.266234	-0.0111711
0.55	0.0747914	0.0734254	0.0886944	-1.68226	-0.26591	-0.0112297
0.551	0.0740708	0.0720406	0.0888376	-1.67833	-0.265491	-0.0104376
0.552	0.0735255	0.0719344	0.0899059	-1.67606	-0.265099	-0.0100119
0.552	0.0733361	0.0722771	0.0904802	-1.67356	-0.264456	-0.0105734
0.553	0.0735903	0.0713159	0.0902611	-1.67143	-0.263438	-0.0109935
0.554	0.0730616	0.0703454	0.0894433	-1.66944	-0.261041	-0.0112636
0.554	0.0725426	0.0693516	0.0893971	-1.66652	-0.257865	-0.0121969
0.555	0.0717688	0.0696231	0.0893633	-1.66439	-0.255697	-0.0135183
0.556	0.0704334	0.069389	0.0879854	-1.66085	-0.254902	-0.0137194
0.556	0.0687231	0.0683735	0.0878734	-1.65957	-0.254632	-0.0153697
0.557	0.0674712	0.0667565	0.0862846	-1.65803	-0.253814	-0.0161534
0.558	0.0672472	0.0654987	0.0844364	-1.65602	-0.252213	-0.0182205
0.558	0.0669227	0.0645216	0.0826614	-1.65413	-0.249861	-0.0191326
0.559	0.067205	0.0628893	0.0800448	-1.65235	-0.246703	-0.0195119
0.56	0.0683012	0.0614978	0.0787709	-1.65023	-0.243623	-0.0198553
0.56	0.068544	0.060715	0.0778379	-1.64762	-0.24168	-0.0210636
0.561	0.0674846	0.0597526	0.076532	-1.64607	-0.239683	-0.0216301
0.562	0.0684766	0.0591151	0.0749754	-1.64467	-0.23766	-0.0234499
0.562	0.0688062	0.058939	0.0742349	-1.64196	-0.236211	-0.0252393
0.563	0.0686691	0.0586272	0.0731383	-1.63955	-0.235978	-0.0269388
0.564	0.0685514	0.0585297	0.0739581	-1.63787	-0.235833	-0.0275865
0.564	0.0678718	0.0589071	0.0740952	-1.63569	-0.235415	-0.0286336
0.565	0.0673657	0.0585801	0.0723926	-1.6325	-0.234804	-0.0306242
0.566	0.0668919	0.057461	0.0714859	-1.62842	-0.234328	-0.0317019
0.566	0.0665986	0.0568547	0.0714311	-1.62584	-0.234152	-0.0334023
0.567	0.0658855	0.0555867	0.0707078	-1.62314	-0.233459	-0.0357407
0.568	0.0648601	0.0544912	0.0718726	-1.62086	-0.232636	-0.0379576
0.568	0.0641537	0.05307	0.0720984	-1.61811	-0.233155	-0.0389868
0.569	0.0641059	0.0517285	0.0722668	-1.61579	-0.232864	-0.0397639
0.57	0.0643924	0.0508108	0.0717269	-1.61475	-0.232645	-0.0416103
0.57	0.0646337	0.0513494	0.0715319	-1.61253	-0.23313	-0.04319
0.571	0.0637185	0.0521949	0.0702245	-1.61007	-0.232201	-0.0445965
0.572	0.0639275	0.0524631	0.0694358	-1.60802	-0.231659	-0.0466586
0.572	0.063633	0.0529475	0.0687301	-1.60448	-0.232611	-0.047713
0.573	0.0619272	0.0530186	0.0676364	-1.60187	-0.233154	-0.0494235
0.574	0.0587009	0.052631	0.0663908	-1.6004	-0.233128	-0.0502641
0.574	0.0572014	0.0519458	0.0653803	-1.59827	-0.232616	-0.050554
0.575	0.0573999	0.050889	0.0637296	-1.5956	-0.233257	-0.0511968
0.576	0.0563063	0.0504683	0.062896	-1.59308	-0.234049	-0.0525033
0.576	0.0549789	0.0504945	0.0620528	-1.59192	-0.233741	-0.0545473
0.577	0.05336	0.0505282	0.061117	-1.59039	-0.234099	-0.057158
0.578	0.0512819	0.0505637	0.0601929	-1.58985	-0.233246	-0.0589557
0.578	0.0499274	0.0497503	0.0587844	-1.58736	-0.231876	-0.0600555
0.579	0.0490521	0.0485859	0.0573817	-1.58672	-0.23255	-0.0610623
0.58	0.049785	0.0479612	0.0564636	-1.58447	-0.232466	-0.0617358
0.58	0.0498268	0.0475642	0.0561281	-1.58306	-0.231843	-0.0622249
0.581	0.049058	0.0473672	0.0538531	-1.58176	-0.231191	-0.0636371
0.582	0.0495946	0.0457231	0.0530786	-1.57971	-0.23073	-0.0653611
0.582	0.0493221	0.0445274	0.0524653	-1.57758	-0.230139	-0.0667665
0.583	0.0499306	0.0441078	0.0518414	-1.57487	-0.229053	-0.0676079
0.584	0.049899	0.0427605	0.0497611	-1.57303	-0.229277	-0.0682231
0.584	0.0496509	0.0418618	0.0478143	-1.57241	-0.229092	-0.0684159
0.585	0.0478991	0.0411452	0.0456815	-1.57074	-0.227185	-0.0690327
0.586	0.0463222	0.0397477	0.0442916	-1.56912	-0.226474	-0.070161
0.586	0.0454304	0.0382427	0.0434705	-1.56696	-0.226414	-0.07068
0.587	0.0448609	0.037561	0.0429968	-1.56518	-0.226647	-0.0711282
0.588	0.0431495	0.0371725	0.0423798	-1.56326	-0.226949	-0.0719957
0.588	0.042124	0.0369094	0.0416196	-1.56058	-0.228112	-0.0726428
0.589	0.0402521	0.0366188	0.0418337	-1.55935	-0.227333	-0.0738251
0.59	0.0390074	0.0363764	0.0416467	-1.55708	-0.226675	-0.0745562
0.59	0.039017	0.0362327	0.0411124	-1.55408	-0.226697	-0.0748915
0.591	0.0378985	0.0358068	0.0418653	-1.55147	-0.22606	-0.0748687
0.592	0.0369758	0.0358836	0.0419349	-1.54904	-0.226336	-0.0746338
0.592	0.0356861	0.0368714	0.042723	-1.54613	-0.227276	-0.0750276
0.593	0.0335536	0.0376898	0.0430398	-1.54281	-0.228295	-0.0759588
0.594	0.0300071	0.0380337	0.04231	-1.53957	-0.228839	-0.0767879
0.594	0.0291185	0.0384753	0.0423374	-1.53578	-0.229582	-0.0773922
0.595	0.0269762	0.0377854	0.0428499	-1.53138	-0.230069	-0.0772928
0.596	0.0248228	0.0378114	0.0422241	-1.52677	-0.230235	-0.0770251
0.596	0.0239559	0.0380249	0.0427239	-1.52252	-0.229335	-0.0773188
0.597	0.0226076	0.0373051	0.0430676	-1.51883	-0.228741	-0.0774201
0.598	0.0210348	0.0362284	0.041812	-1.51516	-0.228543	-0.0786185
0.598	0.0203775	0.0352358	0.0425008	-1.51217	-0.2274	-0.0792446
0.599	0.0184979	0.0346388	0.0425589	-1.50912	-0.22654	-0.079604
0.6	0.0168041	0.0339658	0.0421337	-1.50633	-0.225507	-0.0798702
0.6	0.015684	0.0335911	0.0427581	-1.50363	-0.225038	-0.0791248
0.601	0.0137232	0.0331429	0.0416487	-1.50019	-0.224399	-0.078778
0.602	0.0122677	0.033367	0.0413937	-1.4978	-0.223115	-0.0793005
0.602	0.0120542	0.0336859	0.0405368	-1.49433	-0.222364	-0.0794261
0.603	0.0103929	0.0334802	0.0391855	-1.49003	-0.221804	-0.0796238
0.604	0.00913542	0.0322644	0.0374145	-1.48675	-0.221797	-0.080052
0.604	0.00958243	0.031288	0.0377563	-1.48351	-0.221366	-0.0805636
0.605	0.00817874	0.0303914	0.0386011	-1.48017	-0.219834	-0.0804531
0.606	0.00791177	0.0299361	0.0383039	-1.47764	-0.218614	-0.0813729
0.606	0.00808945	0.0288097	0.0388972	-1.47543	-0.217381	-0.0811218
0.607	0.00863349	0.02818	0.0385851	-1.47161	-0.216453	-0.0814378
0.608	0.0087307	0.0279935	0.0383535	-1.46803	-0.215858	-0.0823989
0.608	0.00793523	0.0277164	0.0380872	-1.46528	-0.215538	-0.0831026
0.609	0.00751897	0.0268987	0.0369507	-1.46275	-0.214495	-0.0829836
0.61	0.00784329	0.0261772	0.0370224	-1.45925	-0.21408	-0.0824606
0.61	0.00852396	0.0258308	0.0370008	-1.45605	-0.21412	-0.0824163
0.611	0.00841496	0.0248504	0.036971	-1.45233	-0.214334	-0.0819462
0.612	0.00772941	0.0237318	0.0371548	-1.4506	-0.213954	-0.0814665
0.612	0.00708741	0.0229	0.0361474	-1.44744	-0.21316	-0.0815261
0.613	0.00524812	0.02186	0.0356259	-1.4434	-0.212787	-0.0823761
0.614	0.00412836	0.0213236	0.0343948	-1.44073	-0.21276	-0.0830069
0.614	0.00204782	0.0213675	0.0347274	-1.43752	-0.212728	-0.0828514
0.615	0.000701353	0.021796	0.0344654	-1.43401	-0.212578	-0.0830573
0.616	-0.000401328	0.0224135	0.0340256	-1.43156	-0.213009	-0.0838161
0.616	-0.00149461	0.0223969	0.0321701	-1.42867	-0.213601	-0.0848777
0.617	-0.000903933	0.0223057	0.0319393	-1.42461	-0.213169	-0.0863995
0.618	-0.00137532	0.0222081	0.0324469	-1.42099	-0.213142	-0.0891254
0.618	-0.00128455	0.0214078	0.0339012	-1.41668	-0.212721	-0.0915132
0.619	-0.00129739	0.0209914	0.0331444	-1.41286	-0.212694	-0.0922857
0.62	-0.00188614	0.0214588	0.0332828	-1.40922	-0.212845	-0.0945465
0.62	-0.00205623	0.0211917	0.0319646	-1.40542	-0.212991	-0.0967029
0.621	-0.00282728	0.019943	0.0317439	-1.40135	-0.213198	-0.0977733
0.622	-0.00266624	0.0188098	0.0318846	-1.39937	-0.211912	-0.0976325
0.622	-0.0019305	0.0181201	0.0327218	-1.39665	-0.212224	-0.098389
0.623	-0.00150177	0.0178312	0.0318763	-1.3924	-0.21124	-0.098415
0.624	-0.00272608	0.0177521	0.0317272	-1.38966	-0.210308	-0.09861
0.624	-0.0040827	0.0182417	0.030244	-1.38637	-0.210546	-0.0998392
0.625	-0.00483235	0.0178106	0.029883	-1.38372	-0.210364	-0.100878
0.626	-0.005859	0.0168461	0.0287608	-1.37993	-0.209482	-0.101251
0.626	-0.00681073	0.016308	0.028952	-1.3779	-0.208131	-0.101898
0.627	-0.00516544	0.0160321	0.0298433	-1.37596	-0.206716	-0.102368
0.628	-0.00626199	0.0154222	0.0295646	-1.37392	-0.205784	-0.102097
0.628	-0.00654316	0.0147865	0.0295361	-1.3714	-0.204839	-0.10235
0.629	-0.00670936	0.0137852	0.030484	-1.36992	-0.204683	-0.102391
0.63	-0.00699843	0.0128185	0.0294541	-1.36883	-0.204948	-0.100877
0.63	-0.00740989	0.0126269	0.0282275	-1.36681	-0.204906	-0.0994382
0.631	-0.00625741	0.012758	0.0268676	-1.36473	-0.204103	-0.0980812
0.632	-0.00643673	0.0133747	0.0251783	-1.36309	-0.204295	-0.0957139
0.632	-0.00535227	0.0134929	0.0233349	-1.36088	-0.204949	-0.0942968
0.633	-0.00581009	0.0132468	0.0232797	-1.35878	-0.203534	-0.0937472
0.634	-0.00646169	0.0132547	0.0215838	-1.35573	-0.202879	-0.0936969
0.634	-0.00583303	0.0125629	0.0211871	-1.35287	-0.202693	-0.093195
0.635	-0.00500168	0.0111987	0.0198782	-1.34904	-0.201981	-0.0922672
0.636	-0.00547583	0.0100324	0.0179662	-1.34709	-0.201474	-0.0915226
0.636	-0.0049126	0.00909672	0.0173972	-1.34521	-0.201156	-0.0911435
0.637	-0.00378699	0.00896487	0.0167189	-1.343	-0.200418	-0.0898719
0.638	-0.00510017	0.00914833	0.015437	-1.34038	-0.198282	-0.0878754
0.638	-0.004508	0.00895492	0.0138589	-1.33832	-0.197917	-0.0863657
0.639	-0.0045139	0.0086836	0.0131661	-1.33543	-0.197333	-0.0855588
0.64	-0.00455813	0.00829395	0.0124023	-1.3326	-0.196645	-0.0849551
0.64	-0.00376664	0.00812165	0.0119346	-1.33107	-0.194441	-0.0848934
0.641	-0.00503295	0.00718212	0.0114582	-1.32811	-0.193824	-0.0835257
0.642	-0.00515375	0.00628058	0.011777	-1.3251	-0.193924	-0.0818728
0.642	-0.00570842	0.00659993	0.0130805	-1.32355	-0.19309	-0.0805183
0.643	-0.00708218	0.00622815	0.0137864	-1.32072	-0.192115	-0.0789324
0.644	-0.00866527	0.00503022	0.0136455	-1.31751	-0.188874	-0.0780032
0.644	-0.00966673	0.00447645	0.0133872	-1.3146	-0.187379	-0.078134
0.645	-0.011301	0.0038666	0.0133428	-1.31077	-0.186492	-0.0780597
0.646	-0.012241	0.00361543	0.0137645	-1.30838	-0.185226	-0.0771187
0.646	-0.014213	0.00363019	0.0138584	-1.30642	-0.183724	-0.0760563
0.647	-0.016585	0.00243742	0.0139774	-1.3029	-0.182005	-0.0762199
0.648	-0.0171607	0.00136845	0.014069	-1.30013	-0.180966	-0.0765411
0.648	-0.0186002	0.00106183	0.013592	-1.29707	-0.180442	-0.0761547
0.649	-0.0191327	0.00028233	0.0127531	-1.29351	-0.17891	-0.0749284
0.65	-0.0214492	-0.000260094	0.0126316	-1.29007	-0.177391	-0.0734701
0.65	-0.023722	-0.000929479	0.0129515	-1.28818	-0.177211	-0.0724857
0.651	-0.0235303	-0.00195843	0.012612	-1.2863	-0.176373	-0.0710836
0.652	-0.0242846	-0.00200073	0.0110826	-1.28413	-0.175676	-0.0696545
0.652	-0.0255506	-0.00175338	0.0110633	-1.28159	-0.174689	-0.0686163
0.653	-0.0262632	-0.00245611	0.0107907	-1.27894	-0.173208	-0.0667175
0.653	-0.0279901	-0.00330584	0.0105035	-1.27686	-0.172245	-0.0643794
0.654	-0.0275686	-0.00346163	0.0101293	-1.27512	-0.170003	-0.0633122
0.655	-0.0291295	-0.00359394	0.00955384	-1.27173	-0.168984	-0.0629218
0.655	-0.0299501	-0.00415725	0.0080296	-1.26816	-0.167503	-0.0622837
0.656	-0.0318877	-0.00459885	0.00759928	-1.26642	-0.166503	-0.0619503
0.657	-0.0311435	-0.00542045	0.00761449	-1.26413	-0.16457	-0.0619452
0.657	-0.0311605	-0.00663877	0.00683251	-1.26192	-0.163548	-0.0612506
0.658	-0.0314644	-0.00760638	0.00716414	-1.25954	-0.162454	-0.0604625
0.659	-0.0321161	-0.00881819	0.00836698	-1.257	-0.159746	-0.0605311
0.659	-0.0324615	-0.0104982	0.00879185	-1.2541	-0.158324	-0.0603486
0.66	-0.0342833	-0.0114732	0.00847256	-1.25169	-0.157061	-0.0598496
0.661	-0.0341134	-0.0114004	0.00835955	-1.24896	-0.155518	-0.0603008
0.661	-0.0342924	-0.0110085	0.0078271	-1.24613	-0.154532	-0.0600827
0.662	-0.0345151	-0.0106361	0.00672408	-1.24363	-0.153773	-0.0601175
0.663	-0.0361699	-0.0101885	0.00659657	-1.24058	-0.152184	-0.0617061
0.663	-0.0353825	-0.00934033	0.00593355	-1.23759	-0.150828	-0.0631367
0.664	-0.0356103	-0.00850289	0.00620581	-1.23459	-0.149698	-0.0647806
0.665	-0.0364223	-0.00898856	0.00666098	-1.23143	-0.148927	-0.0669422
0.665	-0.0372854	-0.00859211	0.00735189	-1.22821	-0.148235	-0.0688028
0.666	-0.0360033	-0.00850633	0.0072579	-1.22386	-0.148639	-0.0701524
0.667	-0.0356859	-0.00935532	0.00666139	-1.22161	-0.148664	-0.0716873
0.667	-0.0353745	-0.00966574	0.0055679	-1.22077	-0.148728	-0.0724566
0.668	-0.0363216	-0.0087564	0.00572247	-1.21927	-0.147967	-0.0731823
0.669	-0.0371108	-0.00843752	0.00622831	-1.21845	-0.147426	-0.0745276
0.669	-0.038281	-0.00765317	0.00599249	-1.21659	-0.146242	-0.0759199
0.67	-0.0395679	-0.0075024	0.00533475	-1.21408	-0.144495	-0.0772738
0.671	-0.0408428	-0.00769377	0.00467876	-1.2124	-0.144986	-0.079709
0.671	-0.0418298	-0.00779744	0.0038767	-1.20908	-0.145263	-0.0819993
0.672	-0.0436961	-0.00843414	0.00306527	-1.20613	-0.145145	-0.0834582
0.673	-0.0438388	-0.0085558	0.00268998	-1.20354	-0.144747	-0.0846441
0.673	-0.044597	-0.00912084	0.00220517	-1.20015	-0.144337	-0.0855872
0.674	-0.0442867	-0.00992795	0.00147723	-1.19708	-0.143449	-0.0870933
0.675	-0.0452132	-0.00973192	0.000668144	-1.19465	-0.141098	-0.0888603
0.675	-0.0456537	-0.0111752	-0.000185596	-1.19104	-0.139042	-0.0903151
0.676	-0.0463441	-0.0118628	-0.00184876	-1.18967	-0.138137	-0.091668
0.677	-0.0463537	-0.0122289	-0.00302933	-1.18779	-0.138343	-0.0925142
0.677	-0.0472202	-0.0135914	-0.00367271	-1.18442	-0.137391	-0.0927849
0.678	-0.047693	-0.0146135	-0.00399068	-1.1812	-0.136223	-0.0929698
0.679	-0.0474696	-0.015063	-0.00472538	-1.17839	-0.13456	-0.0940565
0.679	-0.0462999	-0.0164953	-0.00459057	-1.17578	-0.133973	-0.0952076
0.68	-0.0461304	-0.0175123	-0.00503638	-1.17281	-0.134611	-0.0952111
0.681	-0.0459919	-0.0183734	-0.00549943	-1.16924	-0.133658	-0.0958535
0.681	-0.046004	-0.0195965	-0.00651467	-1.16718	-0.13272	-0.0973611
0.682	-0.0467188	-0.0198175	-0.00776653	-1.16553	-0.132737	-0.0986581
0.683	-0.0463619	-0.020408	-0.00865107	-1.16542	-0.132135	-0.101185
0.683	-0.0463595	-0.0214549	-0.00941378	-1.16486	-0.13063	-0.102378
0.684	-0.0482538	-0.0212061	-0.0108678	-1.16218	-0.129794	-0.102987
0.685	-0.0501106	-0.021259	-0.0115847	-1.16014	-0.130101	-0.104148
0.685	-0.0510967	-0.0219796	-0.0128962	-1.1579	-0.129607	-0.105574
0.686	-0.0514933	-0.0222224	-0.013113	-1.15508	-0.129846	-0.107269
0.687	-0.0510405	-0.0219436	-0.0138865	-1.15277	-0.129162	-0.109265
0.687	-0.0517772	-0.0216287	-0.0140475	-1.1506	-0.129732	-0.110779
0.688	-0.0523012	-0.0217197	-0.0147911	-1.14921	-0.130079	-0.111791
0.689	-0.0534516	-0.0214201	-0.0151056	-1.14763	-0.13073	-0.113622
0.689	-0.0538417	-0.0215069	-0.0149651	-1.14388	-0.131497	-0.114595
0.69	-0.054486	-0.0215655	-0.0154994	-1.14125	-0.132332	-0.115155
0.691	-0.0559229	-0.0214853	-0.015913	-1.13783	-0.132662	-0.11649
0.691	-0.0568645	-0.0207072	-0.0168314	-1.13397	-0.13263	-0.118182
0.692	-0.0571445	-0.019328	-0.0181841	-1.13157	-0.133048	-0.119713
0.693	-0.057716	-0.0177029	-0.0200159	-1.12936	-0.133333	-0.119573
0.693	-0.0578376	-0.017254	-0.0220008	-1.12667	-0.134277	-0.119477
0.694	-0.058953	-0.0178598	-0.0229447	-1.1234	-0.134173	-0.11909
0.695	-0.0597326	-0.0183692	-0.0231028	-1.1214	-0.134652	-0.119704
0.695	-0.0609824	-0.0191279	-0.0229379	-1.11816	-0.13459	-0.121199
0.696	-0.061669	-0.0200972	-0.0236584	-1.11485	-0.13452	-0.120916
0.697	-0.0642221	-0.020924	-0.0239581	-1.11251	-0.134711	-0.120121
0.697	-0.0660749	-0.0217385	-0.0238879	-1.11131	-0.135529	-0.119374
0.698	-0.0670209	-0.0219025	-0.0244671	-1.10965	-0.134713	-0.118587
0.699	-0.068124	-0.0224057	-0.0249298	-1.1076	-0.133134	-0.117448
0.699	-0.0693823	-0.0229923	-0.0255532	-1.10623	-0.133217	-0.116318
0.7	-0.069606	-0.0234656	-0.0262069	-1.10413	-0.133233	-0.114779
0.701	-0.0702422	-0.024024	-0.0267666	-1.10019	-0.132387	-0.113888
0.701	-0.0709331	-0.0253796	-0.0265509	-1.09698	-0.132967	-0.114407
0.702	-0.0709995	-0.0266541	-0.0263917	-1.09318	-0.133756	-0.114358
0.703	-0.0709274	-0.0276519	-0.0267581	-1.08956	-0.134908	-0.113688
0.703	-0.0705187	-0.0280842	-0.0266381	-1.08658	-0.137024	-0.11312
0.704	-0.0688067	-0.0289394	-0.0268297	-1.08337	-0.138174	-0.112977
0.705	-0.0683713	-0.0291968	-0.0275144	-1.08079	-0.138023	-0.111154
0.705	-0.0686741	-0.0295944	-0.0278479	-1.07785	-0.137632	-0.109764
0.706	-0.0690032	-0.030028	-0.0284506	-1.07484	-0.137419	-0.108873
0.707	-0.0690896	-0.0301393	-0.029269	-1.07231	-0.138338	-0.10853
0.707	-0.0690714	-0.0304509	-0.0296829	-1.06986	-0.139157	-0.108309
0.708	-0.067567	-0.0307869	-0.0297811	-1.06795	-0.141452	-0.107129
0.709	-0.0674844	-0.0310452	-0.0311946	-1.06592	-0.143213	-0.10661
0.709	-0.0660256	-0.0312143	-0.0323002	-1.06322	-0.144907	-0.106779
0.71	-0.0662539	-0.0307639	-0.0322381	-1.06055	-0.146542	-0.107765
0.711	-0.065349	-0.0303581	-0.0324418	-1.05862	-0.147588	-0.1079
0.711	-0.0638636	-0.030765	-0.033363	-1.0576	-0.148645	-0.108036
0.712	-0.0631658	-0.0307429	-0.0339406	-1.05652	-0.150002	-0.107761
0.713	-0.0617148	-0.0303581	-0.0341216	-1.05522	-0.151649	-0.108163
0.713	-0.0604135	-0.0298896	-0.0352597	-1.05444	-0.150863	-0.109619
0.714	-0.0597027	-0.0297478	-0.0365053	-1.05364	-0.15225	-0.109851
0.715	-0.0581461	-0.0298885	-0.0361777	-1.05204	-0.152178	-0.110171
0.715	-0.0569291	-0.0301762	-0.0358613	-1.05028	-0.152299	-0.110895
0.716	-0.0566706	-0.0303649	-0.036793	-1.04773	-0.153069	-0.110306
0.717	-0.0563526	-0.030009	-0.0377221	-1.0439	-0.154383	-0.110486
0.717	-0.0559288	-0.0301004	-0.0380586	-1.04069	-0.15405	-0.11094
0.718	-0.0550802	-0.0301497	-0.0384599	-1.03769	-0.153904	-0.110719
0.719	-0.054233	-0.0305616	-0.0393535	-1.03551	-0.155493	-0.110617
0.719	-0.0545594	-0.0311437	-0.04038	-1.03314	-0.15464	-0.110966
0.72	-0.0552456	-0.0317612	-0.0406026	-1.03006	-0.155776	-0.110759
0.721	-0.0550341	-0.0319784	-0.0407757	-1.02709	-0.157588	-0.111081
0.721	-0.0531534	-0.0325713	-0.041625	-1.02495	-0.156999	-0.111263
0.722	-0.0518267	-0.0333453	-0.0425861	-1.02292	-0.155879	-0.111719
0.723	-0.0505245	-0.0337514	-0.0439973	-1.02204	-0.154434	-0.112328
0.723	-0.0510324	-0.0341022	-0.0450728	-1.02029	-0.15309	-0.113055
0.724	-0.0497287	-0.0341482	-0.0457239	-1.01874	-0.152251	-0.113665
0.725	-0.0488269	-0.034733	-0.0464432	-1.01719	-0.15198	-0.113525
0.725	-0.0484853	-0.0354873	-0.0478287	-1.01531	-0.15195	-0.113636
0.726	-0.0479817	-0.0369595	-0.0482705	-1.01239	-0.153535	-0.114522
0.727	-0.0472541	-0.0373523	-0.0473157	-1.00978	-0.15392	-0.11453
0.727	-0.045995	-0.0376426	-0.0473291	-1.00869	-0.154116	-0.114831
0.728	-0.0464066	-0.0379023	-0.0484089	-1.00721	-0.154316	-0.114445
0.729	-0.0455368	-0.0371043	-0.0495365	-1.00582	-0.153811	-0.113793
0.729	-0.0450502	-0.0368575	-0.0503658	-1.00483	-0.15421	-0.114799
0.73	-0.0441749	-0.0372755	-0.0516915	-1.00301	-0.1542	-0.116019
0.731	-0.0430759	-0.038144	-0.0538221	-1.00072	-0.153593	-0.116456
0.731	-0.0422682	-0.0388353	-0.0552121	-0.998817	-0.154486	-0.116353
0.732	-0.0423975	-0.0397909	-0.0564159	-0.997351	-0.156134	-0.116459
0.733	-0.0422665	-0.0400512	-0.0582433	-0.995521	-0.156711	-0.11662
0.733	-0.0423617	-0.0395823	-0.058912	-0.992923	-0.155983	-0.11792
0.734	-0.0428168	-0.0399877	-0.05852	-0.990392	-0.155881	-0.118465
0.735	-0.042978	-0.0398048	-0.0591212	-0.98886	-0.155635	-0.118652
0.735	-0.0435674	-0.0394053	-0.0603909	-0.987318	-0.155698	-0.118639
0.736	-0.0445492	-0.0394626	-0.0612888	-0.986888	-0.156204	-0.119278
0.737	-0.0455412	-0.0399268	-0.0625472	-0.98581	-0.155886	-0.119116
0.737	-0.0465386	-0.0403224	-0.0639144	-0.985016	-0.155555	-0.118063
0.738	-0.047365	-0.0409565	-0.0650094	-0.984803	-0.155952	-0.117952
0.739	-0.0470673	-0.0404404	-0.0654943	-0.98454	-0.156283	-0.118275
0.739	-0.0472783	-0.0398868	-0.065674	-0.983257	-0.15713	-0.117502
0.74	-0.0479487	-0.039258	-0.0655898	-0.982199	-0.157351	-0.116783
0.741	-0.0487235	-0.0375682	-0.0658608	-0.980993	-0.157349	-0.11619
0.741	-0.0501582	-0.0362562	-0.0657857	-0.979066	-0.1566	-0.117089
0.742	-0.0508876	-0.0346922	-0.0655995	-0.976519	-0.156647	-0.11743
0.743	-0.0510349	-0.0341096	-0.0656663	-0.973386	-0.156311	-0.118269
0.743	-0.0513962	-0.0334757	-0.0661493	-0.9716	-0.15621	-0.117914
0.744	-0.0519704	-0.0330058	-0.0668631	-0.969426	-0.156644	-0.118329
0.745	-0.0535495	-0.0320219	-0.06737	-0.967024	-0.157305	-0.118554
0.745	-0.0547047	-0.0311908	-0.0677844	-0.964008	-0.157816	-0.119562
0.746	-0.0559683	-0.0303042	-0.0688171	-0.961605	-0.15814	-0.120969
0.747	-0.0572308	-0.0303857	-0.0693635	-0.95792	-0.159416	-0.121579
0.747	-0.0573872	-0.030568	-0.0688958	-0.955498	-0.159728	-0.120635
0.748	-0.0587901	-0.0307294	-0.0694748	-0.952382	-0.160574	-0.120075
0.749	-0.0602204	-0.0309385	-0.070293	-0.94954	-0.161339	-0.119584
0.749	-0.0599429	-0.0306639	-0.0689624	-0.946396	-0.161705	-0.120895
0.75	-0.0594051	-0.0311107	-0.0682158	-0.944026	-0.16176	-0.121872
0.751	-0.0590188	-0.031962	-0.0679715	-0.942509	-0.162157	-0.123257
0.751	-0.0582379	-0.0320782	-0.0679103	-0.940994	-0.162954	-0.124288
0.752	-0.0576312	-0.0322986	-0.0681588	-0.939294	-0.163205	-0.12519
0.753	-0.0572826	-0.0329943	-0.0675097	-0.938698	-0.164311	-0.124336
0.753	-0.0571758	-0.0338834	-0.067046	-0.937581	-0.165607	-0.125209
0.754	-0.0569967	-0.0339717	-0.0669345	-0.936084	-0.165356	-0.125405
0.755	-0.0578889	-0.0335742	-0.0666004	-0.933075	-0.165109	-0.126279
0.755	-0.0582678	-0.0345975	-0.0657113	-0.930672	-0.166263	-0.126897
0.756	-0.0585202	-0.0351516	-0.0654819	-0.928087	-0.168563	-0.127263
0.757	-0.0583333	-0.0352123	-0.0659629	-0.925923	-0.170383	-0.128277
0.757	-0.0587381	-0.0359078	-0.0652746	-0.923903	-0.171486	-0.127321
0.758	-0.0595256	-0.0362097	-0.064398	-0.922523	-0.172045	-0.127094
0.759	-0.0592266	-0.036916	-0.0636385	-0.921114	-0.172687	-0.12788
0.759	-0.0590188	-0.0380314	-0.0629783	-0.919631	-0.171237	-0.127985
0.76	-0.0589589	-0.0391874	-0.0631446	-0.917825	-0.170821	-0.129304
0.761	-0.0590896	-0.040454	-0.0638449	-0.91478	-0.1704	-0.130859
0.761	-0.059343	-0.0419434	-0.0641823	-0.911456	-0.170997	-0.131134
0.762	-0.0599716	-0.0434308	-0.0645156	-0.908619	-0.171361	-0.132098
0.763	-0.0604949	-0.0436541	-0.0649875	-0.905881	-0.171566	-0.131721
0.763	-0.0614185	-0.0448704	-0.0644751	-0.903549	-0.171602	-0.133048
0.764	-0.0630809	-0.0455936	-0.0636368	-0.900775	-0.172446	-0.134277
0.765	-0.0648543	-0.0468271	-0.0626087	-0.897355	-0.172826	-0.135302
0.765	-0.0653089	-0.0477285	-0.0626891	-0.894314	-0.172709	-0.13679
0.766	-0.0664666	-0.0480937	-0.0618414	-0.891095	-0.172798	-0.13794
0.767	-0.0672591	-0.048101	-0.0603371	-0.888412	-0.173429	-0.138825
0.767	-0.0682431	-0.0477348	-0.0600063	-0.886668	-0.17338	-0.139775
0.768	-0.0697962	-0.0473739	-0.0595704	-0.883997	-0.173746	-0.140289
0.769	-0.0709692	-0.0480994	-0.0591606	-0.880665	-0.173985	-0.140323
0.769	-0.0711734	-0.0480397	-0.0580785	-0.877259	-0.174885	-0.140729
0.77	-0.071813	-0.0487401	-0.0569311	-0.874704	-0.17546	-0.141771
0.771	-0.0732578	-0.0482789	-0.0561827	-0.871796	-0.17527	-0.143598
0.771	-0.0741873	-0.0486719	-0.0549201	-0.868022	-0.175451	-0.145393
0.772	-0.075118	-0.0493515	-0.0540904	-0.864694	-0.176013	-0.14616
0.773	-0.0760466	-0.050317	-0.0548498	-0.861386	-0.176896	-0.148191
0.773	-0.0764873	-0.0501606	-0.0558064	-0.8581	-0.176924	-0.150123
0.774	-0.0770585	-0.0510673	-0.0571116	-0.854945	-0.176765	-0.151183
0.775	-0.0782182	-0.0519508	-0.0589007	-0.852594	-0.176987	-0.15191
0.775	-0.0794	-0.0534398	-0.0597067	-0.85021	-0.176393	-0.152126
0.776	-0.0809776	-0.0550161	-0.0595534	-0.84844	-0.176464	-0.151102
0.777	-0.0815044	-0.0557716	-0.0596942	-0.846155	-0.176359	-0.150655
0.777	-0.0823928	-0.0561622	-0.0599429	-0.843373	-0.17604	-0.150561
0.778	-0.0826685	-0.0561329	-0.0605413	-0.841655	-0.17591	-0.150796
0.779	-0.0834829	-0.0562381	-0.0609414	-0.840499	-0.17608	-0.151583
0.779	-0.0845359	-0.0567699	-0.0616155	-0.83889	-0.17512	-0.151238
0.78	-0.0844921	-0.0561662	-0.061944	-0.836894	-0.174085	-0.150117
0.781	-0.0849416	-0.0567624	-0.0621568	-0.83483	-0.174029	-0.149939
0.781	-0.0847941	-0.0554017	-0.0627896	-0.832511	-0.174431	-0.149677
0.782	-0.0851867	-0.0553166	-0.0639033	-0.830143	-0.174616	-0.149713
0.783	-0.0864781	-0.0556116	-0.0656429	-0.8271	-0.174307	-0.149486
0.783	-0.0879077	-0.054386	-0.0666955	-0.824174	-0.174367	-0.14913
0.784	-0.0893609	-0.0530264	-0.0680734	-0.821184	-0.174574	-0.148871
0.785	-0.0907055	-0.0526301	-0.0685379	-0.818228	-0.173839	-0.148602
0.785	-0.0925095	-0.0518177	-0.0684924	-0.815363	-0.173251	-0.148479
0.786	-0.0948526	-0.0513552	-0.0698254	-0.81204	-0.173103	-0.148918
0.787	-0.0970764	-0.0500558	-0.0710575	-0.808696	-0.172445	-0.149366
0.787	-0.09925	-0.0502121	-0.0720799	-0.804932	-0.171805	-0.148947
0.788	-0.100284	-0.0514438	-0.0729344	-0.801646	-0.172212	-0.148866
0.789	-0.101074	-0.0507215	-0.073319	-0.798486	-0.172655	-0.147172
0.789	-0.101897	-0.0502656	-0.0731706	-0.794753	-0.172135	-0.14577
0.79	-0.103115	-0.050799	-0.0739173	-0.791777	-0.172179	-0.144628
0.791	-0.10415	-0.0504673	-0.0758733	-0.789126	-0.171888	-0.144486
0.791	-0.104627	-0.0504339	-0.076849	-0.786222	-0.170716	-0.143584
0.792	-0.105409	-0.0511449	-0.0772809	-0.783706	-0.170218	-0.143929
0.793	-0.106856	-0.0503863	-0.0777314	-0.78262	-0.170748	-0.143072
0.793	-0.108061	-0.0507985	-0.0780895	-0.781402	-0.171428	-0.143508
0.794	-0.108881	-0.0505566	-0.0777149	-0.780159	-0.17278	-0.143362
0.795	-0.109566	-0.0507075	-0.076969	-0.778639	-0.173337	-0.143098
0.795	-0.110669	-0.0500198	-0.0765532	-0.77719	-0.17337	-0.142547
0.796	-0.111356	-0.0513374	-0.0763685	-0.775894	-0.173368	-0.143459
0.797	-0.11139	-0.0511114	-0.0764973	-0.774841	-0.173599	-0.142101
0.797	-0.11177	-0.050409	-0.0770101	-0.773794	-0.173387	-0.141628
0.798	-0.112148	-0.0499438	-0.0776215	-0.772211	-0.171758	-0.142143
0.799	-0.112593	-0.0494691	-0.0768327	-0.770492	-0.170184	-0.141789
0.799	-0.113234	-0.0499317	-0.0783482	-0.769557	-0.169506	-0.142109
0.8	-0.113909	-0.051211	-0.0800104	-0.767927	-0.169144	-0.141078
0.801	-0.114483	-0.0514592	-0.0804031	-0.766274	-0.168991	-0.140412
0.801	-0.113783	-0.0527478	-0.0819849	-0.765845	-0.168952	-0.139287
0.802	-0.113114	-0.0525286	-0.0830415	-0.765225	-0.167548	-0.139308
0.803	-0.113165	-0.0523043	-0.0832314	-0.76318	-0.165135	-0.138611
0.803	-0.113111	-0.0516453	-0.0839488	-0.760784	-0.163605	-0.137862
0.804	-0.112316	-0.0530694	-0.0831115	-0.759338	-0.162425	-0.137678
0.805	-0.112279	-0.0525453	-0.0827825	-0.757329	-0.161796	-0.1376
0.805	-0.112713	-0.053079	-0.0837188	-0.755755	-0.161259	-0.138204
0.806	-0.111747	-0.0539175	-0.0842201	-0.754729	-0.160461	-0.13783
0.807	-0.111059	-0.0565243	-0.0844776	-0.753254	-0.159374	-0.137371
0.807	-0.110637	-0.0575291	-0.084297	-0.751572	-0.158897	-0.135464
0.808	-0.109483	-0.0588116	-0.0830788	-0.749238	-0.15907	-0.135741
0.809	-0.108147	-0.0590762	-0.0821498	-0.74731	-0.159155	-0.13553
0.809	-0.107497	-0.0584141	-0.0818796	-0.744698	-0.158992	-0.13658
0.81	-0.107288	-0.0595905	-0.0811755	-0.74297	-0.158858	-0.13679
0.811	-0.107049	-0.0612584	-0.081296	-0.741518	-0.15859	-0.136177
0.811	-0.106523	-0.0624776	-0.080554	-0.738943	-0.158285	-0.136446
0.812	-0.105852	-0.0642782	-0.0810571	-0.735858	-0.158055	-0.13679
0.813	-0.10555	-0.0658488	-0.0809151	-0.732992	-0.158158	-0.136466
0.813	-0.10571	-0.0672486	-0.0811929	-0.730486	-0.158667	-0.136524
0.814	-0.106019	-0.0675097	-0.0820887	-0.727897	-0.158832	-0.137133
0.815	-0.106259	-0.0702249	-0.0813494	-0.725385	-0.158142	-0.13815
0.815	-0.106239	-0.0713085	-0.0815741	-0.723564	-0.157695	-0.13858
0.816	-0.106595	-0.0722941	-0.0804353	-0.721466	-0.156813	-0.138507
0.817	-0.10614	-0.0735175	-0.0793782	-0.719799	-0.15565	-0.138359
0.817	-0.103908	-0.0753522	-0.078852	-0.717233	-0.155156	-0.139262
0.818	-0.102191	-0.0774556	-0.0776096	-0.71554	-0.155775	-0.139385
0.819	-0.101078	-0.0796939	-0.0774054	-0.71362	-0.155494	-0.14014
0.819	-0.0990647	-0.0804232	-0.0768423	-0.711657	-0.155915	-0.14099
0.82	-0.0964847	-0.081213	-0.0767821	-0.70982	-0.156554	-0.140727
0.821	-0.0947368	-0.0816772	-0.0765801	-0.707751	-0.157606	-0.141858
0.821	-0.0941348	-0.0815436	-0.0760463	-0.705685	-0.157814	-0.141955
0.822	-0.094377	-0.0821629	-0.0762861	-0.704017	-0.157947	-0.143816
0.823	-0.0948148	-0.081825	-0.0764279	-0.703066	-0.158746	-0.145237
0.823	-0.0944149	-0.0816677	-0.0760821	-0.701575	-0.1592	-0.146386
0.824	-0.0935612	-0.0821454	-0.0745674	-0.699995	-0.16035	-0.147432
0.825	-0.093322	-0.0832829	-0.0739978	-0.698249	-0.162016	-0.149761
0.825	-0.0934154	-0.0830992	-0.0744483	-0.695908	-0.163687	-0.150125
0.826	-0.0930019	-0.0823244	-0.0747319	-0.693595	-0.164327	-0.151329
0.826	-0.0925526	-0.0817978	-0.074803	-0.69062	-0.164473	-0.152987
0.827	-0.0926142	-0.0820024	-0.0754407	-0.688728	-0.16474	-0.154656
0.828	-0.0922446	-0.0811541	-0.0764634	-0.686392	-0.166303	-0.1551
0.828	-0.0911257	-0.0820023	-0.0775938	-0.683312	-0.167394	-0.157316
0.829	-0.089525	-0.08161	-0.0776763	-0.680669	-0.168224	-0.158023
0.83	-0.0880511	-0.081394	-0.0772861	-0.678603	-0.169372	-0.158861
0.83	-0.0862307	-0.0818294	-0.0767555	-0.675591	-0.169831	-0.159317
0.831	-0.0840918	-0.0821383	-0.0764515	-0.673435	-0.171404	-0.160645
0.832	-0.0818427	-0.0825568	-0.0761841	-0.671836	-0.173028	-0.161307
0.832	-0.080535	-0.0828929	-0.0739237	-0.669478	-0.173837	-0.162054
0.833	-0.0796951	-0.0827881	-0.0726104	-0.667315	-0.174491	-0.163031
0.834	-0.0789113	-0.0831424	-0.0712901	-0.665128	-0.176014	-0.163581
0.834	-0.0788856	-0.0832336	-0.0701819	-0.662173	-0.177663	-0.163843
0.835	-0.0783453	-0.0840546	-0.0693254	-0.658881	-0.178665	-0.165058
0.836	-0.0774316	-0.0847804	-0.0688093	-0.655984	-0.18013	-0.16652
0.836	-0.0761454	-0.0868575	-0.0680409	-0.653015	-0.181086	-0.168108
0.837	-0.0749942	-0.0876473	-0.067419	-0.650074	-0.182462	-0.168872
0.838	-0.0744586	-0.0884712	-0.0665124	-0.647639	-0.183904	-0.168895
0.838	-0.0727114	-0.0888203	-0.0660121	-0.645108	-0.183977	-0.16985
0.839	-0.073376	-0.0888816	-0.0653639	-0.642486	-0.183976	-0.170025
0.84	-0.0740555	-0.0878545	-0.0642976	-0.640219	-0.184178	-0.170183
0.84	-0.0743178	-0.086507	-0.0624898	-0.638462	-0.184894	-0.17202
0.841	-0.0747702	-0.0863373	-0.0619391	-0.636035	-0.185043	-0.172575
0.842	-0.0750753	-0.0866134	-0.0618436	-0.634176	-0.185266	-0.173211
0.842	-0.0745373	-0.0869922	-0.0622479	-0.633282	-0.184959	-0.173702
0.843	-0.0741557	-0.0872611	-0.0629563	-0.63191	-0.184543	-0.173836
0.844	-0.074349	-0.0863763	-0.0619835	-0.629997	-0.185088	-0.174667
0.844	-0.0733369	-0.0858511	-0.0611546	-0.628041	-0.185941	-0.175054
0.845	-0.0730938	-0.0849488	-0.0599424	-0.626066	-0.186386	-0.174415
0.846	-0.0723026	-0.0844455	-0.0589778	-0.623826	-0.18632	-0.174357
0.846	-0.0716811	-0.083851	-0.058149	-0.62206	-0.186169	-0.174608
0.847	-0.0718465	-0.0846363	-0.0580781	-0.621076	-0.185944	-0.175277
0.848	-0.0710405	-0.0847952	-0.0585827	-0.618997	-0.186278	-0.175014
0.848	-0.0706571	-0.0839918	-0.0577739	-0.617069	-0.186236	-0.175045
0.849	-0.0710137	-0.0840694	-0.0575346	-0.615838	-0.186719	-0.174778
0.85	-0.0712975	-0.0850208	-0.0574944	-0.61572	-0.187649	-0.175744
0.85	-0.0721155	-0.0852505	-0.0572805	-0.615496	-0.187184	-0.174919
0.851	-0.0732333	-0.084463	-0.0580986	-0.61425	-0.186856	-0.174484
0.852	-0.0729609	-0.0831828	-0.0591728	-0.612489	-0.187554	-0.173439
0.852	-0.0719705	-0.0819609	-0.0597141	-0.610923	-0.188206	-0.173317
0.853	-0.0716611	-0.0825651	-0.0599195	-0.610158	-0.18774	-0.174281
0.854	-0.0712649	-0.0819243	-0.0609139	-0.610002	-0.187535	-0.173848
0.854	-0.0712136	-0.0824729	-0.0617494	-0.609179	-0.187621	-0.174137
0.855	-0.0706489	-0.0828428	-0.0617422	-0.607933	-0.187787	-0.173348
0.856	-0.0700243	-0.0836827	-0.0623096	-0.606785	-0.186916	-0.173205
0.856	-0.0696538	-0.0849588	-0.060922	-0.605841	-0.184792	-0.172821
0.857	-0.0692553	-0.0859368	-0.061096	-0.604364	-0.182564	-0.172062
0.858	-0.0684856	-0.0854445	-0.0617774	-0.602975	-0.181667	-0.171384
0.858	-0.0681679	-0.0854135	-0.0623246	-0.601577	-0.181123	-0.171512
0.859	-0.0682677	-0.0862635	-0.0621832	-0.599622	-0.18028	-0.171822
0.86	-0.0689094	-0.086732	-0.0622251	-0.59795	-0.179621	-0.171321
0.86	-0.0690548	-0.0863597	-0.0627979	-0.595804	-0.17874	-0.170643
0.861	-0.0688939	-0.0862664	-0.0636437	-0.594321	-0.177605	-0.171997
0.862	-0.0690291	-0.0851351	-0.0633703	-0.594336	-0.177144	-0.171828
0.862	-0.0697672	-0.0847435	-0.0630951	-0.59296	-0.177285	-0.172037
0.863	-0.0712359	-0.0842428	-0.0639284	-0.590358	-0.17685	-0.172507
0.864	-0.071715	-0.0838056	-0.0644947	-0.588732	-0.176976	-0.173366
0.864	-0.0717919	-0.0833157	-0.0652661	-0.587874	-0.177584	-0.173506
0.865	-0.0724319	-0.0827674	-0.0665393	-0.586843	-0.177848	-0.173579
0.866	-0.0728763	-0.0815254	-0.0686059	-0.585136	-0.178228	-0.172734
0.866	-0.0731051	-0.0801993	-0.0699526	-0.584817	-0.178523	-0.172541
0.867	-0.0731452	-0.0802397	-0.0718769	-0.583727	-0.177677	-0.171785
0.868	-0.0732094	-0.0799654	-0.0728915	-0.582476	-0.176995	-0.171592
0.868	-0.0739788	-0.0791012	-0.073555	-0.581716	-0.177843	-0.169744
0.869	-0.0756257	-0.0788902	-0.0742474	-0.58125	-0.17871	-0.167307
0.87	-0.0769613	-0.0790188	-0.0758597	-0.581145	-0.179455	-0.166327
0.87	-0.0780846	-0.0775784	-0.0771713	-0.579622	-0.180599	-0.165087
0.871	-0.0787622	-0.076176	-0.0794401	-0.578484	-0.181191	-0.164618
0.872	-0.079263	-0.0755351	-0.0807877	-0.577928	-0.181264	-0.163774
0.872	-0.0785564	-0.0749106	-0.0807849	-0.575737	-0.181949	-0.163304
0.873	-0.0782046	-0.074926	-0.0816084	-0.573997	-0.183146	-0.163737
0.874	-0.0782238	-0.0761888	-0.0838569	-0.57225	-0.184371	-0.16268
0.874	-0.0779907	-0.0760279	-0.085151	-0.571009	-0.184559	-0.161463
0.875	-0.0780601	-0.0757398	-0.0855775	-0.569945	-0.184546	-0.160549
0.876	-0.0783255	-0.0758192	-0.0854582	-0.5676	-0.186526	-0.15997
0.876	-0.0780595	-0.0748491	-0.0857195	-0.565437	-0.187921	-0.160748
0.877	-0.0780266	-0.073931	-0.0869182	-0.56324	-0.187511	-0.160903
0.878	-0.0786134	-0.072701	-0.0880474	-0.562034	-0.186435	-0.160928
0.878	-0.0793472	-0.0717311	-0.0884102	-0.561066	-0.185526	-0.161785
0.879	-0.0808909	-0.0719081	-0.0886774	-0.559186	-0.185693	-0.160709
0.88	-0.0821227	-0.0727725	-0.0889365	-0.559067	-0.186069	-0.160282
0.88	-0.0823655	-0.0722904	-0.0890251	-0.557604	-0.186145	-0.159568
0.881	-0.0826204	-0.0711399	-0.088338	-0.557186	-0.185731	-0.159999
0.882	-0.0822658	-0.0706579	-0.0880448	-0.555844	-0.18617	-0.159603
0.882	-0.0814557	-0.0703455	-0.0881941	-0.553948	-0.186384	-0.159828
0.883	-0.0816308	-0.0696017	-0.0888343	-0.552093	-0.186422	-0.158834
0.884	-0.0832377	-0.0681002	-0.0891494	-0.550172	-0.187607	-0.159597
0.884	-0.0850332	-0.0669073	-0.0890487	-0.548767	-0.188012	-0.160182
0.885	-0.0867928	-0.0660314	-0.0896957	-0.54711	-0.187441	-0.160958
0.886	-0.0884429	-0.0665982	-0.0884076	-0.545242	-0.187414	-0.160043
0.886	-0.089745	-0.0668146	-0.0884362	-0.543916	-0.188033	-0.159003
0.887	-0.0908269	-0.0672622	-0.0873909	-0.542091	-0.187732	-0.158918
0.888	-0.0920925	-0.067304	-0.086909	-0.541137	-0.186756	-0.158881
0.888	-0.0934578	-0.0672762	-0.0883179	-0.539574	-0.186595	-0.159699
0.889	-0.0944646	-0.0679052	-0.0895783	-0.537788	-0.187521	-0.159253
0.89	-0.0951109	-0.0681791	-0.0898967	-0.536566	-0.189978	-0.158777
0.89	-0.0961293	-0.0681345	-0.0906196	-0.535367	-0.1922	-0.158929
0.891	-0.0976485	-0.0689741	-0.0912992	-0.534353	-0.19394	-0.159543
0.892	-0.0983615	-0.0695335	-0.090584	-0.533852	-0.195346	-0.159197
0.892	-0.0986442	-0.0709388	-0.0900606	-0.532493	-0.195572	-0.158138
0.893	-0.0978879	-0.0721275	-0.0908817	-0.53173	-0.196552	-0.157056
0.894	-0.0973935	-0.0734211	-0.0920128	-0.530554	-0.19786	-0.156671
0.894	-0.0971796	-0.0746639	-0.0922777	-0.529494	-0.198648	-0.156535
0.895	-0.0970822	-0.0761134	-0.0921459	-0.528072	-0.198052	-0.15673
0.896	-0.0973149	-0.0775242	-0.0921677	-0.526428	-0.197739	-0.156792
0.896	-0.0975491	-0.0787065	-0.0931882	-0.524955	-0.196138	-0.156473
0.897	-0.0978289	-0.0798464	-0.0938144	-0.524161	-0.195158	-0.155933
0.898	-0.0999249	-0.0809404	-0.0943754	-0.522701	-0.193499	-0.155591
0.898	-0.101204	-0.0815994	-0.0949223	-0.520375	-0.192117	-0.155224
0.899	-0.101255	-0.0837566	-0.0944363	-0.519004	-0.189835	-0.155667
0.9	-0.100281	-0.0852024	-0.0949278	-0.516419	-0.188187	-0.157
0.9	-0.100249	-0.0862264	-0.095182	-0.514785	-0.186679	-0.158394
0.901	-0.100749	-0.0865086	-0.0950807	-0.513679	-0.18588	-0.15991
0.902	-0.101356	-0.0873796	-0.0953825	-0.512377	-0.184117	-0.162557
0.902	-0.100278	-0.087382	-0.0957406	-0.511431	-0.182524	-0.165481
0.903	-0.100004	-0.0870319	-0.0963139	-0.51027	-0.181427	-0.167137
0.904	-0.0999421	-0.0870844	-0.097141	-0.509618	-0.179399	-0.167721
0.904	-0.0999293	-0.088317	-0.0971542	-0.508312	-0.177483	-0.16864
0.905	-0.100211	-0.0881456	-0.0971427	-0.506572	-0.177231	-0.169685
0.906	-0.101772	-0.0886504	-0.0986974	-0.505513	-0.175845	-0.17091
0.906	-0.101582	-0.0891154	-0.0994334	-0.504441	-0.174346	-0.171428
0.907	-0.100955	-0.0882248	-0.099639	-0.503035	-0.173423	-0.172867
0.908	-0.100357	-0.0877115	-0.100009	-0.501323	-0.173858	-0.17485
0.908	-0.100377	-0.0871395	-0.100087	-0.499689	-0.174408	-0.176222
0.909	-0.100631	-0.0866169	-0.101199	-0.499572	-0.17372	-0.177247
0.91	-0.101029	-0.0865807	-0.101631	-0.498706	-0.172712	-0.177855
0.91	-0.100903	-0.0880305	-0.10209	-0.498363	-0.172227	-0.178425
0.911	-0.101472	-0.0898903	-0.103133	-0.49765	-0.172745	-0.179742
0.912	-0.101489	-0.090821	-0.104042	-0.496605	-0.173186	-0.18069
0.912	-0.100648	-0.0900155	-0.105449	-0.495318	-0.173391	-0.182874
0.913	-0.0998168	-0.0891586	-0.105857	-0.493494	-0.172802	-0.184734
0.914	-0.0998425	-0.0886308	-0.107015	-0.490911	-0.172646	-0.185445
0.914	-0.0995086	-0.0887492	-0.107833	-0.489145	-0.173281	-0.186195
0.915	-0.0991723	-0.0887877	-0.108407	-0.48811	-0.173517	-0.186944
0.916	-0.0985641	-0.088676	-0.11042	-0.487178	-0.172802	-0.186989
0.916	-0.0975932	-0.0880619	-0.111923	-0.485283	-0.172877	-0.187467
0.917	-0.0967696	-0.0883129	-0.11429	-0.48396	-0.171687	-0.187723
0.918	-0.0947729	-0.0893358	-0.115555	-0.482891	-0.170254	-0.187115
0.918	-0.0935953	-0.090056	-0.11511	-0.481785	-0.169356	-0.186399
0.919	-0.0935555	-0.0896951	-0.116357	-0.481202	-0.16908	-0.186656
0.92	-0.0932001	-0.0900605	-0.117158	-0.479376	-0.168689	-0.186824
0.92	-0.0929729	-0.089943	-0.118052	-0.476949	-0.169844	-0.187512
0.921	-0.0921783	-0.089764	-0.118829	-0.475851	-0.170886	-0.187767
0.922	-0.0916521	-0.0889902	-0.119006	-0.474502	-0.170901	-0.188264
0.922	-0.0910735	-0.0890279	-0.118295	-0.472897	-0.170717	-0.188638
0.923	-0.0908397	-0.0889344	-0.119129	-0.47036	-0.170583	-0.189981
0.924	-0.0901006	-0.0879891	-0.119774	-0.468465	-0.170801	-0.191605
0.924	-0.0893215	-0.0870005	-0.119533	-0.466603	-0.17095	-0.191572
0.925	-0.0885083	-0.0869024	-0.120126	-0.464834	-0.17082	-0.191161
0.926	-0.0881207	-0.0849135	-0.121435	-0.463679	-0.172562	-0.191872
0.926	-0.0885837	-0.0836138	-0.121851	-0.460756	-0.173132	-0.193511
0.927	-0.0884986	-0.0812377	-0.12046	-0.459203	-0.173656	-0.194301
0.928	-0.0885087	-0.0801415	-0.120078	-0.457995	-0.173927	-0.193579
0.928	-0.0883777	-0.0787066	-0.120864	-0.45589	-0.17472	-0.192974
0.929	-0.088305	-0.0771417	-0.121521	-0.452754	-0.175871	-0.19321
0.93	-0.0884382	-0.0758423	-0.121396	-0.451792	-0.177895	-0.194195
0.93	-0.088672	-0.0744754	-0.12102	-0.449929	-0.179324	-0.195363
0.931	-0.0881535	-0.0731987	-0.120857	-0.44749	-0.1807	-0.195285
0.932	-0.0866979	-0.0725465	-0.12002	-0.445464	-0.181464	-0.195382
0.932	-0.086611	-0.0718371	-0.119729	-0.444303	-0.182881	-0.19468
0.933	-0.0878226	-0.0714965	-0.118906	-0.442891	-0.184638	-0.19278
0.934	-0.0884402	-0.071298	-0.117698	-0.441019	-0.186887	-0.192424
0.934	-0.0888373	-0.0705818	-0.11692	-0.439247	-0.188527	-0.192308
0.935	-0.0884679	-0.0695856	-0.115586	-0.437145	-0.189319	-0.192333
0.936	-0.0886113	-0.069276	-0.115355	-0.434685	-0.190443	-0.19283
0.936	-0.0888555	-0.0697648	-0.114674	-0.433219	-0.192093	-0.192662
0.937	-0.0891687	-0.0700242	-0.114168	-0.431358	-0.193436	-0.19403
0.938	-0.0890805	-0.070001	-0.113791	-0.429282	-0.194429	-0.194809
0.938	-0.0878523	-0.0704459	-0.114049	-0.428554	-0.19527	-0.195399
0.939	-0.0874111	-0.0709828	-0.112904	-0.428007	-0.195521	-0.195412
0.94	-0.0877151	-0.070777	-0.110724	-0.427489	-0.196272	-0.195707
0.94	-0.0884487	-0.0710592	-0.110997	-0.42587	-0.197397	-0.195498
0.941	-0.0897675	-0.0716542	-0.110239	-0.425012	-0.195656	-0.196462
0.942	-0.0902475	-0.0719294	-0.109881	-0.424939	-0.195279	-0.197075
0.942	-0.0899819	-0.0721112	-0.109745	-0.422744	-0.195627	-0.197693
0.943	-0.0905105	-0.0726884	-0.108778	-0.42203	-0.194529	-0.197985
0.944	-0.0907267	-0.072727	-0.108539	-0.419974	-0.195973	-0.198337
0.944	-0.0904804	-0.0723428	-0.108332	-0.417131	-0.197156	-0.19784
0.945	-0.0903491	-0.0729903	-0.108366	-0.415001	-0.198162	-0.196954
0.946	-0.0912067	-0.0740335	-0.107731	-0.413201	-0.199353	-0.197166
0.946	-0.0914879	-0.0748708	-0.108326	-0.410608	-0.201443	-0.197914
0.947	-0.0901432	-0.0756721	-0.108009	-0.409478	-0.202432	-0.198737
0.948	-0.0904756	-0.0768551	-0.108987	-0.4091	-0.202933	-0.199346
0.948	-0.0925471	-0.0776312	-0.108958	-0.407861	-0.203328	-0.199662
0.949	-0.0937196	-0.0771845	-0.10899	-0.406159	-0.204774	-0.200468
0.95	-0.0950923	-0.0771218	-0.109048	-0.405004	-0.205109	-0.201381
0.95	-0.0952181	-0.0775118	-0.107984	-0.404099	-0.206848	-0.201688
0.951	-0.096201	-0.0776832	-0.107445	-0.402308	-0.208493	-0.202286
0.952	-0.0968128	-0.0780824	-0.107649	-0.400706	-0.209606	-0.202864
0.952	-0.0967078	-0.0788668	-0.107704	-0.39854	-0.209824	-0.203401
0.953	-0.0964128	-0.079079	-0.107312	-0.396862	-0.211361	-0.204079
0.954	-0.0969432	-0.0791192	-0.10716	-0.396296	-0.211369	-0.204709
0.954	-0.0983818	-0.0786253	-0.106934	-0.393573	-0.211335	-0.20528
0.955	-0.098727	-0.0781566	-0.106109	-0.391794	-0.212433	-0.205827
0.956	-0.0993311	-0.0781826	-0.106679	-0.390164	-0.212403	-0.206252
0.956	-0.0993338	-0.0779839	-0.10777	-0.388504	-0.211076	-0.205866
0.957	-0.0994998	-0.0778901	-0.108035	-0.387356	-0.21116	-0.205056
0.958	-0.100553	-0.0770201	-0.108228	-0.385181	-0.21017	-0.205516
0.958	-0.102087	-0.0762513	-0.109163	-0.382843	-0.211555	-0.206778
0.959	-0.103338	-0.0765062	-0.110553	-0.380909	-0.209326	-0.20754
0.96	-0.103313	-0.0768652	-0.111749	-0.379099	-0.209464	-0.206722
0.96	-0.105	-0.078428	-0.112561	-0.376289	-0.20985	-0.205907
0.961	-0.105839	-0.0805483	-0.112122	-0.374097	-0.209028	-0.206055
0.962	-0.106609	-0.0817023	-0.112396	-0.372436	-0.209738	-0.206288
0.962	-0.107158	-0.0830015	-0.112788	-0.371784	-0.209228	-0.206233
0.963	-0.107284	-0.0845711	-0.112677	-0.370524	-0.208947	-0.205839
0.964	-0.107526	-0.0862916	-0.112858	-0.368381	-0.208361	-0.205758
0.964	-0.107191	-0.08826	-0.113519	-0.367228	-0.20824	-0.205802
0.965	-0.107817	-0.089514	-0.113572	-0.365457	-0.20895	-0.205389
0.966	-0.110862	-0.0896616	-0.113738	-0.363496	-0.21049	-0.20478
0.966	-0.110517	-0.0898121	-0.113881	-0.361929	-0.21052	-0.204958
0.967	-0.110711	-0.0898928	-0.114627	-0.360412	-0.21031	-0.205362
0.968	-0.111031	-0.0897794	-0.116399	-0.358812	-0.210141	-0.205576
0.968	-0.112835	-0.0900148	-0.118595	-0.357356	-0.210007	-0.205224
0.969	-0.11366	-0.0898714	-0.119454	-0.355498	-0.210971	-0.203904
0.97	-0.113348	-0.0893574	-0.119697	-0.35354	-0.210766	-0.203214
0.97	-0.113254	-0.0892065	-0.120082	-0.351563	-0.211132	-0.202702
0.971	-0.113212	-0.0892658	-0.121318	-0.350336	-0.212	-0.201754
0.972	-0.114929	-0.0891069	-0.120965	-0.349746	-0.211557	-0.20124
0.972	-0.115341	-0.087948	-0.12056	-0.34897	-0.213093	-0.201376
0.973	-0.116332	-0.0875873	-0.120991	-0.347826	-0.213807	-0.201023
0.974	-0.117015	-0.0879777	-0.121328	-0.345925	-0.214524	-0.200504
0.974	-0.116451	-0.087951	-0.122013	-0.344591	-0.216259	-0.199968
0.975	-0.11687	-0.0878962	-0.122776	-0.341932	-0.217171	-0.199036
0.976	-0.118321	-0.0882697	-0.1237	-0.340033	-0.216534	-0.198134
0.976	-0.117881	-0.0873353	-0.124048	-0.337843	-0.216707	-0.196853
0.977	-0.117979	-0.0867054	-0.124441	-0.336157	-0.216173	-0.196013
0.978	-0.11795	-0.0856654	-0.124602	-0.335689	-0.215759	-0.195875
0.978	-0.118181	-0.0847876	-0.124804	-0.334281	-0.21553	-0.195947
0.979	-0.117574	-0.0846388	-0.125609	-0.334485	-0.213587	-0.195152
0.98	-0.117699	-0.0841125	-0.125837	-0.33376	-0.211886	-0.193661
0.98	-0.118517	-0.0836071	-0.125558	-0.332945	-0.211755	-0.193315
0.981	-0.11895	-0.0824218	-0.125025	-0.330889	-0.210068	-0.193464
0.982	-0.118258	-0.0819117	-0.125579	-0.329669	-0.20947	-0.193467
0.982	-0.117222	-0.0831178	-0.125116	-0.328919	-0.207798	-0.194022
0.983	-0.115532	-0.0844856	-0.124209	-0.327896	-0.207111	-0.194421
0.984	-0.114398	-0.0845273	-0.123652	-0.327079	-0.205927	-0.193956
0.984	-0.113739	-0.0835838	-0.123857	-0.326587	-0.205565	-0.193589
0.985	-0.113115	-0.0828545	-0.123648	-0.326307	-0.20595	-0.193719
0.986	-0.112087	-0.0821735	-0.122978	-0.326079	-0.205602	-0.193548
0.986	-0.111319	-0.0816099	-0.122301	-0.325189	-0.205007	-0.193204
0.987	-0.110353	-0.0810912	-0.121048	-0.323511	-0.204245	-0.193046
0.988	-0.10859	-0.0812419	-0.120738	-0.322611	-0.203768	-0.19263
0.988	-0.10791	-0.0816917	-0.120838	-0.322586	-0.203429	-0.191696
0.989	-0.107912	-0.081452	-0.119762	-0.32114	-0.203035	-0.190678
0.99	-0.108117	-0.0806722	-0.118641	-0.320638	-0.203398	-0.190532
0.99	-0.108122	-0.081168	-0.117641	-0.318738	-0.202409	-0.190558
0.991	-0.106398	-0.0825774	-0.117014	-0.317925	-0.201665	-0.190108
0.992	-0.105303	-0.0836996	-0.115844	-0.31775	-0.199724	-0.188958
0.992	-0.104789	-0.0840594	-0.11449	-0.317188	-0.199955	-0.188508
0.993	-0.104393	-0.084523	-0.113807	-0.316219	-0.200176	-0.188876
0.994	-0.10347	-0.0843638	-0.113661	-0.316731	-0.198156	-0.188952
0.994	-0.103649	-0.0837721	-0.114702	-0.316108	-0.198369	-0.188902
0.995	-0.103516	-0.0830476	-0.1142	-0.316486	-0.197323	-0.188659
0.996	-0.103199	-0.0823222	-0.113719	-0.315425	-0.19736	-0.188012
0.996	-0.102661	-0.081506	-0.113027	-0.3152	-0.196914	-0.187048
0.997	-0.102205	-0.0818193	-0.113131	-0.315026	-0.196686	-0.186404
0.998	-0.102323	-0.0821688	-0.112886	-0.314875	-0.196665	-0.186486
0.998	-0.102796	-0.0823015	-0.112706	-0.315803	-0.196277	-0.187052
0.999	-0.100685	-0.0826371	-0.113099	-0.315848	-0.195214	-0.187402
0.999	-0.100926	-0.0826165	-0.112996	-0.316342	-0.194495	-0.187054
1	-0.101829	-0.0831898	-0.112201	-0.316437	-0.193445	-0.186577
1.001	-0.101333	-0.0841877	-0.111611	-0.317118	-0.190837	-0.1865
1.001	-0.0994423	-0.0853737	-0.111047	-0.318032	-0.192513	-0.185971
1.002	-0.0992141	-0.0861687	-0.11052	-0.320942	-0.192025	-0.1858
1.003	-0.100174	-0.0871234	-0.108772	-0.325248	-0.190826	-0.186705
1.003	-0.100497	-0.0876337	-0.0965354	-0.334131	-0.189599	-0.187162
1.004	-0.102887	-0.101704	-0.094684	-0.875838	-0.340759	-0.187166
1.005	-0.102788	-0.102875	-0.0925201	-1.01168	-0.399311	-0.184718
1.005	-0.105088	-0.10354	-0.0910854	-1.09883	-0.439547	-0.182465
1.006	-0.106248	-0.105471	-0.0895308	-1.17071	-0.472168	-0.181808
1.007	-0.106517	-0.106651	-0.0887431	-1.2324	-0.500998	-0.182213
1.007	-0.10728	-0.106951	-0.0887324	-1.2892	-0.527164	-0.181881
1.008	-0.108356	-0.107276	-0.0891954	-1.34545	-0.55307	-0.180341
1.009	-0.108854	-0.107915	-0.0907486	-1.40128	-0.578975	-0.178806
1.009	-0.109287	-0.109286	-0.0910141	-1.45578	-0.604182	-0.178417
1.01	-0.10996	-0.109188	-0.0911478	-1.50829	-0.627896	-0.178391
1.011	-0.109608	-0.110587	-0.0918475	-1.56021	-0.649995	-0.177808
1.011	-0.109092	-0.111052	-0.0925742	-1.60919	-0.670349	-0.176428
1.012	-0.109199	-0.110415	-0.0922985	-1.65644	-0.688974	-0.175017
1.013	-0.110152	-0.110264	-0.0916731	-1.70089	-0.705442	-0.173968
1.013	-0.110004	-0.110372	-0.0919045	-1.74154	-0.718989	-0.173298
1.014	-0.109368	-0.110202	-0.0919034	-1.77939	-0.729577	-0.172358
1.015	-0.10945	-0.110847	-0.0918825	-1.81431	-0.736897	-0.171473
1.015	-0.109227	-0.111043	-0.0912314	-1.84478	-0.743577	-0.170527
1.016	-0.107366	-0.110816	-0.0922042	-1.87163	-0.747476	-0.169427
1.017	-0.106324	-0.111895	-0.0926706	-1.8958	-0.749967	-0.168412
1.017	-0.105943	-0.113398	-0.092924	-1.91715	-0.751388	-0.167467
1.018	-0.105674	-0.114367	-0.0935979	-1.93482	-0.752059	-0.167561
1.019	-0.105388	-0.113924	-0.0936968	-1.95074	-0.752053	-0.166788
1.019	-0.104818	-0.113316	-0.0933151	-1.96376	-0.751953	-0.165816
1.02	-0.104879	-0.112361	-0.0944862	-1.97396	-0.75171	-0.16531
1.021	-0.104599	-0.113417	-0.0943989	-1.98161	-0.751078	-0.16522
1.021	-0.102846	-0.113594	-0.0948327	-1.98772	-0.750877	-0.165326
1.022	-0.102056	-0.11352	-0.0947049	-1.9923	-0.751206	-0.165425
1.023	-0.101131	-0.112519	-0.094255	-1.9952	-0.751983	-0.165291
1.023	-0.0998172	-0.111245	-0.0940582	-1.99673	-0.751087	-0.165625
1.024	-0.0974571	-0.111074	-0.0949008	-1.99508	-0.750646	-0.165345
1.025	-0.0958129	-0.10963	-0.0963627	-1.99105	-0.750855	-0.164742
1.025	-0.0955708	-0.109226	-0.0964076	-1.98292	-0.751355	-0.163695
1.026	-0.0950102	-0.108144	-0.096948	-1.97156	-0.751452	-0.163353
1.027	-0.0941975	-0.107347	-0.0973177	-1.95508	-0.750822	-0.16312
1.027	-0.0943158	-0.106596	-0.0981101	-1.93296	-0.747889	-0.162735
1.028	-0.0948481	-0.106785	-0.09878	-1.90562	-0.743133	-0.162167
1.029	-0.0954045	-0.107673	-0.0989071	-1.87518	-0.73677	-0.162334
1.029	-0.0950454	-0.108267	-0.0992272	-1.8409	-0.729038	-0.163006
1.03	-0.0952269	-0.107575	-0.0999942	-1.80278	-0.718696	-0.16273
1.031	-0.0950703	-0.107381	-0.101073	-1.76309	-0.707615	-0.162894
1.031	-0.0953889	-0.106736	-0.101902	-1.72246	-0.693936	-0.162996
1.032	-0.0950437	-0.105734	-0.102534	-1.67971	-0.679534	-0.162949
1.033	-0.0944303	-0.104009	-0.101765	-1.63475	-0.665984	-0.162203
1.033	-0.0951581	-0.103152	-0.101783	-1.58826	-0.650416	-0.161302
1.034	-0.0961461	-0.102094	-0.102162	-1.54112	-0.633452	-0.160461
1.035	-0.0968451	-0.101292	-0.102707	-1.49303	-0.615282	-0.160691
1.035	-0.0972002	-0.0998114	-0.10259	-1.44298	-0.596338	-0.161893
1.036	-0.0978103	-0.0982576	-0.102859	-1.39034	-0.576491	-0.162015
1.037	-0.098554	-0.0968895	-0.102555	-1.33698	-0.55566	-0.162107
1.037	-0.0998524	-0.0958672	-0.101524	-1.28421	-0.534538	-0.161228
1.038	-0.100447	-0.0953473	-0.10351	-1.22928	-0.511252	-0.160606
1.039	-0.10068	-0.0942642	-0.104795	-1.17322	-0.486851	-0.160953
1.039	-0.100805	-0.0930301	-0.10493	-1.11554	-0.462039	-0.160548
1.04	-0.101354	-0.0927672	-0.105259	-1.05899	-0.436285	-0.15958
1.041	-0.101751	-0.0923885	-0.105722	-1.00126	-0.410112	-0.159379
1.041	-0.102088	-0.0919776	-0.106242	-0.942829	-0.383481	-0.159713
1.042	-0.102416	-0.0912161	-0.105989	-0.884761	-0.357807	-0.160555
1.043	-0.10291	-0.0901552	-0.106922	-0.827288	-0.332519	-0.15988
1.043	-0.10293	-0.0896192	-0.106758	-0.772488	-0.309509	-0.159695
1.044	-0.10354	-0.0884841	-0.105429	-0.719179	-0.288381	-0.16122
1.045	-0.104911	-0.0877194	-0.104393	-0.66816	-0.268154	-0.162191
1.045	-0.105952	-0.0878882	-0.104892	-0.618576	-0.251471	-0.162304
1.046	-0.106493	-0.0878545	-0.105114	-0.571484	-0.237683	-0.162565
1.047	-0.107946	-0.0876043	-0.104781	-0.526969	-0.225813	-0.162717
1.047	-0.110134	-0.0870992	-0.103497	-0.486307	-0.215129	-0.162191
1.048	-0.111723	-0.0867688	-0.102535	-0.44859	-0.207412	-0.160834
1.049	-0.113826	-0.0870759	-0.102854	-0.415558	-0.200961	-0.160284
1.049	-0.11597	-0.0876654	-0.100627	-0.385496	-0.195705	-0.160445
1.05	-0.117159	-0.0874509	-0.0995747	-0.35693	-0.19289	-0.159692
1.051	-0.11813	-0.0869431	-0.0991023	-0.331996	-0.190909	-0.159938
1.051	-0.119162	-0.0860689	-0.0980416	-0.309929	-0.18956	-0.15935
1.052	-0.120307	-0.0857859	-0.0986023	-0.291158	-0.190105	-0.158775
1.053	-0.121758	-0.0863618	-0.0998389	-0.274962	-0.190842	-0.158556
1.053	-0.122025	-0.0865689	-0.0993406	-0.260457	-0.192367	-0.158769
1.054	-0.123327	-0.0859589	-0.0998033	-0.2497	-0.192525	-0.158731
1.055	-0.125052	-0.0850543	-0.100053	-0.240381	-0.193217	-0.158173
1.055	-0.125509	-0.0848743	-0.101238	-0.232375	-0.193996	-0.15744
1.056	-0.126708	-0.0851432	-0.101528	-0.225799	-0.194543	-0.156754
1.057	-0.128113	-0.0863001	-0.102573	-0.220011	-0.194457	-0.155817
1.057	-0.12949	-0.0868174	-0.103321	-0.216485	-0.194538	-0.154922
1.058	-0.13038	-0.0866175	-0.104152	-0.212269	-0.195946	-0.155259
1.059	-0.130096	-0.0866252	-0.104174	-0.210701	-0.196201	-0.155305
1.059	-0.129115	-0.0874868	-0.104847	-0.207967	-0.195643	-0.154901
1.06	-0.130273	-0.0882211	-0.105166	-0.204979	-0.195238	-0.154264
1.061	-0.130536	-0.0892527	-0.105319	-0.20278	-0.195389	-0.153522
1.061	-0.131532	-0.090245	-0.105174	-0.201077	-0.19516	-0.153117
1.062	-0.130489	-0.0898509	-0.105128	-0.199314	-0.195253	-0.152951
1.063	-0.129935	-0.0891975	-0.106273	-0.198742	-0.194804	-0.153517
1.063	-0.128669	-0.0885773	-0.106852	-0.199568	-0.196053	-0.154053
1.064	-0.128543	-0.0888434	-0.10677	-0.199081	-0.196868	-0.153821
1.065	-0.127137	-0.0887087	-0.106496	-0.197812	-0.198205	-0.153583
1.065	-0.125727	-0.0885217	-0.107446	-0.197435	-0.199952	-0.153832
1.066	-0.126481	-0.0890715	-0.108428	-0.196602	-0.199125	-0.15366
1.067	-0.125509	-0.0891897	-0.108875	-0.194893	-0.199267	-0.153757
1.067	-0.125754	-0.0894397	-0.109214	-0.193575	-0.199442	-0.153773
1.068	-0.125433	-0.0895653	-0.109625	-0.191633	-0.20041	-0.1531
1.069	-0.124158	-0.0901546	-0.109797	-0.190888	-0.201509	-0.152053
1.069	-0.124763	-0.0914748	-0.110846	-0.19071	-0.202471	-0.151179
1.07	-0.125584	-0.0919157	-0.110827	-0.190342	-0.203642	-0.150953
1.071	-0.123708	-0.0919206	-0.111972	-0.189415	-0.203174	-0.151749
1.071	-0.122379	-0.0920489	-0.111701	-0.188603	-0.202305	-0.152658
1.072	-0.122458	-0.0929852	-0.11046	-0.187532	-0.203819	-0.152213
1.073	-0.121413	-0.0938963	-0.110907	-0.186402	-0.204143	-0.151279
1.073	-0.120713	-0.0943256	-0.11159	-0.185223	-0.205622	-0.150985
1.074	-0.119885	-0.0947617	-0.112695	-0.185335	-0.206159	-0.150818
1.075	-0.119712	-0.0954476	-0.113032	-0.185301	-0.207099	-0.151245
1.075	-0.119038	-0.0966445	-0.112482	-0.185873	-0.207038	-0.152013
1.076	-0.118362	-0.0971016	-0.112159	-0.185693	-0.207695	-0.152898
1.077	-0.117769	-0.097686	-0.112116	-0.184735	-0.207534	-0.153691
1.077	-0.116815	-0.0985775	-0.112137	-0.185017	-0.206807	-0.153713
1.078	-0.11506	-0.0990631	-0.111774	-0.186041	-0.20777	-0.153787
1.079	-0.113781	-0.0997175	-0.111164	-0.186983	-0.2091	-0.153938
1.079	-0.112129	-0.100051	-0.110782	-0.186888	-0.209122	-0.154246
1.08	-0.110185	-0.10084	-0.111046	-0.188345	-0.209372	-0.155564
1.081	-0.108582	-0.101989	-0.112082	-0.189407	-0.20922	-0.157358
1.081	-0.107481	-0.101374	-0.11267	-0.189811	-0.209241	-0.158792
1.082	-0.106112	-0.100085	-0.112463	-0.190177	-0.209366	-0.160439
1.083	-0.104827	-0.0989517	-0.113344	-0.19105	-0.210519	-0.161826
1.083	-0.104828	-0.0985951	-0.11432	-0.192719	-0.211833	-0.163444
1.084	-0.105413	-0.0991535	-0.114768	-0.194653	-0.212911	-0.164695
1.085	-0.105003	-0.100102	-0.115317	-0.197218	-0.214265	-0.165224
1.085	-0.104419	-0.0993392	-0.114017	-0.198949	-0.213918	-0.165787
1.086	-0.103103	-0.0988636	-0.113087	-0.200349	-0.212803	-0.166328
1.087	-0.102484	-0.0988644	-0.113156	-0.20157	-0.212506	-0.167011
1.087	-0.101838	-0.0990095	-0.113364	-0.202884	-0.213954	-0.168186
1.088	-0.101575	-0.0995359	-0.112721	-0.203582	-0.212925	-0.170026
1.089	-0.100182	-0.0999859	-0.112731	-0.204728	-0.212862	-0.171498
1.089	-0.0996607	-0.100867	-0.113028	-0.20637	-0.212599	-0.172648
1.09	-0.0992997	-0.10125	-0.112189	-0.20797	-0.211759	-0.174579
1.091	-0.100061	-0.101261	-0.111924	-0.208499	-0.211242	-0.176015
1.091	-0.100268	-0.102912	-0.111623	-0.210241	-0.210224	-0.176656
1.092	-0.100827	-0.104085	-0.111835	-0.210089	-0.208999	-0.17829
1.093	-0.100627	-0.104878	-0.111952	-0.211574	-0.208801	-0.180121
1.093	-0.0995802	-0.106113	-0.111986	-0.212949	-0.208457	-0.181741
1.094	-0.0994779	-0.107244	-0.112241	-0.214306	-0.207549	-0.182289
1.095	-0.0977945	-0.107332	-0.113313	-0.216632	-0.207781	-0.183211
1.095	-0.0979145	-0.10746	-0.115246	-0.217411	-0.208774	-0.184721
1.096	-0.0969355	-0.10752	-0.116101	-0.217752	-0.208563	-0.185325
1.097	-0.0969759	-0.108484	-0.11664	-0.218379	-0.208185	-0.186222
1.097	-0.0971949	-0.109446	-0.117716	-0.219158	-0.208393	-0.187024
1.098	-0.0981647	-0.109507	-0.118368	-0.22099	-0.207812	-0.187235
1.099	-0.0990502	-0.110753	-0.118956	-0.222076	-0.206222	-0.187619
1.099	-0.0985037	-0.111264	-0.119711	-0.223978	-0.20608	-0.188305
1.1	-0.0981571	-0.112883	-0.120916	-0.226705	-0.205724	-0.188866
1.101	-0.096833	-0.11496	-0.121874	-0.228607	-0.204948	-0.189332
1.101	-0.0965956	-0.115949	-0.12207	-0.231691	-0.204414	-0.189578
1.102	-0.0970525	-0.116908	-0.122395	-0.233025	-0.203296	-0.189202
1.103	-0.0953887	-0.118187	-0.12279	-0.23536	-0.202401	-0.188785
1.103	-0.0940087	-0.119582	-0.123856	-0.236264	-0.20141	-0.188835
1.104	-0.0951051	-0.121129	-0.124092	-0.237389	-0.199986	-0.189083
1.105	-0.0961893	-0.123249	-0.124445	-0.239677	-0.20042	-0.188615
1.105	-0.097223	-0.125079	-0.124753	-0.241856	-0.199985	-0.188439
1.106	-0.0983942	-0.125704	-0.12431	-0.244679	-0.199476	-0.188436
1.107	-0.0998332	-0.125392	-0.124253	-0.246923	-0.198607	-0.188285
1.107	-0.101014	-0.125804	-0.123559	-0.248585	-0.198543	-0.188665
1.108	-0.101877	-0.126255	-0.123426	-0.250289	-0.19832	-0.189756
1.109	-0.102259	-0.125438	-0.124445	-0.25133	-0.198011	-0.190292
1.109	-0.102433	-0.125065	-0.124	-0.253087	-0.197711	-0.190555
1.11	-0.102643	-0.125387	-0.12433	-0.255587	-0.197722	-0.192099
1.111	-0.103819	-0.125942	-0.124587	-0.255545	-0.197625	-0.193554
1.111	-0.104474	-0.126815	-0.124811	-0.255583	-0.197619	-0.194795
1.112	-0.104303	-0.127832	-0.125074	-0.255729	-0.197169	-0.195968
1.113	-0.105647	-0.127764	-0.12533	-0.257766	-0.19662	-0.197124
1.113	-0.107191	-0.127022	-0.125135	-0.257645	-0.194961	-0.197887
1.114	-0.107169	-0.126576	-0.124314	-0.257569	-0.195005	-0.198053
1.115	-0.107271	-0.1278	-0.124374	-0.258569	-0.194257	-0.198775
1.115	-0.107105	-0.129229	-0.12462	-0.257608	-0.193019	-0.199434
1.116	-0.106952	-0.1303	-0.124602	-0.258111	-0.192855	-0.199335
1.117	-0.107758	-0.131602	-0.124878	-0.259245	-0.192779	-0.199871
1.117	-0.106296	-0.132019	-0.125091	-0.259089	-0.192371	-0.200624
1.118	-0.105803	-0.131668	-0.125602	-0.259219	-0.191883	-0.202015
1.119	-0.106434	-0.132271	-0.127078	-0.258822	-0.192329	-0.203045
1.119	-0.106911	-0.133258	-0.128633	-0.257749	-0.193549	-0.203468
1.12	-0.107815	-0.133907	-0.129272	-0.257569	-0.193509	-0.203337
1.121	-0.108504	-0.134863	-0.12941	-0.258133	-0.192939	-0.20282
1.121	-0.109057	-0.134937	-0.12966	-0.258268	-0.195085	-0.203112
1.122	-0.11111	-0.134424	-0.129916	-0.258894	-0.195948	-0.202592
1.123	-0.112694	-0.134242	-0.130163	-0.259278	-0.196053	-0.201461
1.123	-0.113834	-0.134489	-0.131056	-0.258445	-0.197519	-0.200721
1.124	-0.114185	-0.133591	-0.131849	-0.258173	-0.198681	-0.200013
1.125	-0.114881	-0.132479	-0.132289	-0.257757	-0.199831	-0.199696
1.125	-0.116279	-0.13253	-0.132188	-0.2586	-0.200063	-0.199611
1.126	-0.118133	-0.132643	-0.132189	-0.258083	-0.199915	-0.199054
1.127	-0.119275	-0.132283	-0.133245	-0.257784	-0.199246	-0.199345
1.127	-0.119219	-0.131927	-0.133529	-0.257397	-0.199928	-0.200316
1.128	-0.119745	-0.132079	-0.132517	-0.255624	-0.199773	-0.200867
1.129	-0.120123	-0.132528	-0.131293	-0.256016	-0.199103	-0.200032
1.129	-0.122355	-0.133305	-0.130225	-0.255512	-0.198177	-0.199467
1.13	-0.123402	-0.133953	-0.129256	-0.254531	-0.198706	-0.199113
1.131	-0.124362	-0.134557	-0.127967	-0.254183	-0.198546	-0.198283
1.131	-0.124162	-0.134341	-0.127445	-0.253759	-0.198789	-0.198537
1.132	-0.123686	-0.13341	-0.126635	-0.253958	-0.199534	-0.198038
1.133	-0.124628	-0.133199	-0.12556	-0.253287	-0.200294	-0.197414
1.133	-0.124845	-0.131963	-0.12457	-0.252546	-0.200678	-0.197775
1.134	-0.124991	-0.130557	-0.123611	-0.25328	-0.202416	-0.198395
1.135	-0.125452	-0.130371	-0.123413	-0.252919	-0.201809	-0.199754
1.135	-0.126492	-0.130036	-0.123555	-0.252605	-0.201211	-0.201243
1.136	-0.127511	-0.129449	-0.123236	-0.251746	-0.200255	-0.203082
1.137	-0.129029	-0.128724	-0.122338	-0.251058	-0.199456	-0.204677
1.137	-0.128337	-0.127431	-0.122339	-0.250868	-0.20029	-0.206018
1.138	-0.127135	-0.126379	-0.123464	-0.250846	-0.200359	-0.207044
1.139	-0.125964	-0.125678	-0.124189	-0.250599	-0.199962	-0.208463
1.139	-0.126759	-0.126257	-0.124491	-0.249715	-0.200386	-0.210352
1.14	-0.12607	-0.126943	-0.124432	-0.248981	-0.199927	-0.211981
1.141	-0.126279	-0.127241	-0.124063	-0.248147	-0.200201	-0.212241
1.141	-0.127106	-0.127623	-0.123433	-0.246908	-0.200005	-0.21147
1.142	-0.127568	-0.128159	-0.122743	-0.246453	-0.200361	-0.210739
1.143	-0.127571	-0.128941	-0.122689	-0.245974	-0.200921	-0.209936
1.143	-0.127919	-0.129548	-0.123261	-0.244744	-0.199972	-0.209223
1.144	-0.128403	-0.129623	-0.12381	-0.244585	-0.200489	-0.208866
1.145	-0.129737	-0.128693	-0.125114	-0.244805	-0.201626	-0.208649
1.145	-0.130989	-0.127617	-0.125917	-0.244346	-0.201018	-0.209869
1.146	-0.131465	-0.127513	-0.126449	-0.242293	-0.201861	-0.210333
1.147	-0.132715	-0.128143	-0.126689	-0.241241	-0.20403	-0.210142
1.147	-0.1325	-0.128815	-0.127186	-0.240889	-0.204043	-0.209325
1.148	-0.133068	-0.129162	-0.128306	-0.240168	-0.203819	-0.209734
1.149	-0.133455	-0.129142	-0.129246	-0.240706	-0.205343	-0.210056
1.149	-0.134743	-0.128891	-0.129563	-0.240794	-0.204926	-0.20955
1.15	-0.134396	-0.129143	-0.129278	-0.240338	-0.203459	-0.209333
1.151	-0.134982	-0.128984	-0.128841	-0.24041	-0.203192	-0.209147
1.151	-0.136136	-0.129059	-0.128813	-0.240111	-0.203932	-0.208644
1.152	-0.135707	-0.128794	-0.127924	-0.240304	-0.203718	-0.208319
1.153	-0.135878	-0.128619	-0.12673	-0.240946	-0.203543	-0.209125
1.153	-0.136234	-0.128984	-0.125896	-0.242053	-0.203597	-0.209433
1.154	-0.135526	-0.129335	-0.125276	-0.241338	-0.203322	-0.209851
1.155	-0.135014	-0.129488	-0.124664	-0.240705	-0.202514	-0.208811
1.155	-0.134171	-0.129832	-0.124021	-0.240586	-0.201727	-0.20861
1.156	-0.132844	-0.129531	-0.123537	-0.239546	-0.201087	-0.209726
1.157	-0.13217	-0.129003	-0.123005	-0.239785	-0.200954	-0.21016
1.157	-0.131126	-0.129655	-0.122134	-0.23967	-0.201198	-0.211165
1.158	-0.130215	-0.130854	-0.122037	-0.240099	-0.201316	-0.2112
1.159	-0.129205	-0.130629	-0.122775	-0.24033	-0.201974	-0.21063
1.159	-0.128549	-0.130782	-0.122632	-0.240872	-0.202707	-0.210643
1.16	-0.128394	-0.130395	-0.1217	-0.239496	-0.203329	-0.210289
1.161	-0.129387	-0.130541	-0.121422	-0.238915	-0.204088	-0.209046
1.161	-0.129948	-0.129909	-0.12162	-0.239163	-0.205081	-0.207524
1.162	-0.12982	-0.129551	-0.121473	-0.238312	-0.206397	-0.206953
1.163	-0.129665	-0.130397	-0.121435	-0.238875	-0.208349	-0.20581
1.163	-0.129844	-0.130998	-0.122486	-0.239501	-0.208924	-0.203949
1.164	-0.130023	-0.130674	-0.123932	-0.240057	-0.209359	-0.203418
1.165	-0.130308	-0.13078	-0.124062	-0.239778	-0.209963	-0.202538
1.165	-0.131686	-0.131194	-0.124618	-0.239286	-0.211155	-0.201189
1.166	-0.132423	-0.130893	-0.125982	-0.239467	-0.211611	-0.200688
1.167	-0.133263	-0.130693	-0.127242	-0.240047	-0.211311	-0.200163
1.167	-0.133938	-0.131047	-0.127653	-0.238535	-0.209654	-0.20021
1.168	-0.134762	-0.130999	-0.127472	-0.237829	-0.209982	-0.199313
1.169	-0.134815	-0.130539	-0.127749	-0.237049	-0.211041	-0.198509
1.169	-0.135398	-0.130752	-0.128423	-0.2361	-0.212118	-0.197459
1.17	-0.135011	-0.131067	-0.128821	-0.236208	-0.213984	-0.196642
1.171	-0.13528	-0.131497	-0.129063	-0.235304	-0.21421	-0.194055
1.171	-0.136254	-0.131529	-0.128855	-0.234409	-0.215034	-0.192537
1.172	-0.137044	-0.131279	-0.128533	-0.233471	-0.215269	-0.192676
1.172	-0.136632	-0.130719	-0.128853	-0.232981	-0.215412	-0.192676
1.173	-0.136746	-0.129534	-0.129396	-0.232582	-0.215624	-0.192485
1.174	-0.136744	-0.12966	-0.129904	-0.232467	-0.216046	-0.194345
1.174	-0.135154	-0.129948	-0.129352	-0.232494	-0.216347	-0.196076
1.175	-0.134534	-0.130009	-0.1291	-0.23201	-0.215764	-0.196929
1.176	-0.135986	-0.128869	-0.128404	-0.231298	-0.214518	-0.197937
1.176	-0.137008	-0.128171	-0.127827	-0.230786	-0.214169	-0.197017
1.177	-0.136363	-0.128335	-0.126859	-0.230273	-0.213821	-0.196295
1.178	-0.135895	-0.128448	-0.126963	-0.229127	-0.212447	-0.195718
1.178	-0.135785	-0.128648	-0.127056	-0.228848	-0.211906	-0.193771
1.179	-0.135603	-0.128623	-0.127217	-0.229565	-0.211161	-0.192929
1.18	-0.134374	-0.128365	-0.12693	-0.230344	-0.210052	-0.191859
1.18	-0.134751	-0.128618	-0.126861	-0.230402	-0.209627	-0.191026
1.181	-0.134687	-0.127879	-0.126804	-0.231095	-0.209825	-0.190077
1.182	-0.133657	-0.12699	-0.126487	-0.231012	-0.209639	-0.188912
1.182	-0.133408	-0.126271	-0.126446	-0.230742	-0.210395	-0.189622
1.183	-0.133527	-0.124778	-0.126614	-0.23016	-0.211421	-0.189929
1.184	-0.133133	-0.124188	-0.127331	-0.230109	-0.212351	-0.189616
1.184	-0.132526	-0.12341	-0.127529	-0.229421	-0.212056	-0.189541
1.185	-0.132455	-0.123223	-0.127868	-0.229202	-0.211379	-0.189572
1.186	-0.132753	-0.123034	-0.128807	-0.229546	-0.211378	-0.188694
1.186	-0.133021	-0.122585	-0.129186	-0.229067	-0.210524	-0.189453
1.187	-0.133371	-0.122005	-0.129432	-0.228556	-0.209542	-0.189742
1.188	-0.133391	-0.122312	-0.129543	-0.22865	-0.208689	-0.191109
1.188	-0.133209	-0.122902	-0.129574	-0.227848	-0.207402	-0.192231
1.189	-0.134497	-0.122653	-0.129177	-0.227415	-0.207448	-0.192523
1.19	-0.134953	-0.122907	-0.128848	-0.227474	-0.206153	-0.192423
1.19	-0.136242	-0.123017	-0.128293	-0.22792	-0.205445	-0.191829
1.191	-0.137278	-0.12282	-0.126895	-0.228408	-0.204679	-0.19227
1.192	-0.137841	-0.122867	-0.124926	-0.228104	-0.203675	-0.193262
1.192	-0.138699	-0.123034	-0.123393	-0.227225	-0.202489	-0.193455
1.193	-0.139637	-0.122727	-0.122612	-0.227394	-0.200872	-0.192197
1.194	-0.139801	-0.121902	-0.122007	-0.228084	-0.19976	-0.192094
1.194	-0.139985	-0.122616	-0.121053	-0.228493	-0.198635	-0.192737
1.195	-0.140006	-0.122988	-0.120031	-0.228804	-0.195932	-0.193174
1.196	-0.138997	-0.121766	-0.119085	-0.228731	-0.193853	-0.193034
1.196	-0.138703	-0.119537	-0.117452	-0.228526	-0.191756	-0.193525
1.197	-0.137262	-0.118677	-0.115065	-0.228577	-0.190964	-0.193468
1.198	-0.136692	-0.118489	-0.113907	-0.228845	-0.189428	-0.193929
1.198	-0.135131	-0.117448	-0.113081	-0.22848	-0.186925	-0.194662
1.199	-0.134425	-0.117101	-0.110347	-0.227648	-0.184651	-0.194947
1.2	-0.133686	-0.115521	-0.107801	-0.226796	-0.183246	-0.193831
1.2	-0.133479	-0.114645	-0.105731	-0.22618	-0.18245	-0.191369
1.201	-0.132394	-0.113599	-0.103989	-0.22548	-0.181533	-0.190701
1.202	-0.13122	-0.113477	-0.102371	-0.224868	-0.179356	-0.189903
1.202	-0.129496	-0.111132	-0.100226	-0.225202	-0.178043	-0.188715
1.203	-0.12811	-0.109205	-0.0985594	-0.225038	-0.176027	-0.187581
1.204	-0.127045	-0.108134	-0.0968014	-0.224987	-0.175696	-0.18714
1.204	-0.125812	-0.10639	-0.0943922	-0.224921	-0.173754	-0.186556
1.205	-0.123935	-0.104568	-0.0927605	-0.224032	-0.171767	-0.184617
1.206	-0.122134	-0.104251	-0.0918988	-0.22296	-0.17022	-0.182869
1.206	-0.119168	-0.10442	-0.0910323	-0.221804	-0.169626	-0.181439
1.207	-0.117083	-0.103161	-0.0906067	-0.219597	-0.167582	-0.179051
1.208	-0.115456	-0.100801	-0.0907558	-0.217847	-0.165493	-0.177714
1.208	-0.113384	-0.099788	-0.0903823	-0.215792	-0.16433	-0.176372
1.209	-0.111211	-0.0999917	-0.0892518	-0.214036	-0.163681	-0.174208
1.21	-0.108621	-0.0997736	-0.0876122	-0.21251	-0.163294	-0.173614
1.21	-0.107147	-0.0975691	-0.0861154	-0.21099	-0.162628	-0.172334
1.211	-0.105871	-0.0964001	-0.0841785	-0.210335	-0.161491	-0.171717
1.212	-0.10387	-0.0956115	-0.0821012	-0.209517	-0.160672	-0.171459
1.212	-0.10158	-0.0943881	-0.080107	-0.208402	-0.159711	-0.170946
1.213	-0.100093	-0.0930541	-0.0782425	-0.207088	-0.158962	-0.17034
1.214	-0.0989191	-0.0906093	-0.0767341	-0.206164	-0.157699	-0.171328
1.214	-0.0968699	-0.0885531	-0.074574	-0.205761	-0.157007	-0.17075
1.215	-0.094869	-0.087606	-0.0716745	-0.205202	-0.155276	-0.170599
1.216	-0.0928434	-0.0868942	-0.0694838	-0.203894	-0.15381	-0.169839
1.216	-0.0905201	-0.0856836	-0.0672876	-0.202635	-0.152286	-0.167913
1.217	-0.0890222	-0.0835588	-0.0650466	-0.200921	-0.149675	-0.166417
1.218	-0.0871302	-0.0819589	-0.0625623	-0.199914	-0.147866	-0.164888
1.218	-0.0844298	-0.0798147	-0.0595101	-0.198085	-0.147561	-0.16411
1.219	-0.0813076	-0.0771335	-0.0568048	-0.195644	-0.146978	-0.162865
1.22	-0.0775684	-0.0741316	-0.0542459	-0.19318	-0.146173	-0.160881
1.22	-0.0742085	-0.0712467	-0.0517314	-0.191081	-0.146216	-0.158081
1.221	-0.0724116	-0.067984	-0.0492333	-0.189166	-0.145689	-0.155526
1.222	-0.0708391	-0.0645977	-0.0470821	-0.187695	-0.145081	-0.154171
1.222	-0.0682826	-0.0630441	-0.0446164	-0.185809	-0.143661	-0.152031
1.223	-0.0657573	-0.0607522	-0.0418682	-0.183381	-0.142844	-0.150396
1.224	-0.0638133	-0.0578405	-0.0396861	-0.180939	-0.141235	-0.149022
1.224	-0.0613783	-0.0554671	-0.0382295	-0.179058	-0.139592	-0.146027
1.225	-0.058267	-0.0530075	-0.0375228	-0.177362	-0.138654	-0.142271
1.226	-0.0550629	-0.0492235	-0.0370131	-0.175675	-0.137748	-0.139633
1.226	-0.0517499	-0.0457584	-0.0352017	-0.174046	-0.136748	-0.137913
1.227	-0.0483756	-0.0434531	-0.0347802	-0.172266	-0.134884	-0.135707
1.228	-0.0456271	-0.0407257	-0.0343506	-0.170278	-0.132967	-0.133914
1.228	-0.0437119	-0.0378313	-0.035656	-0.169068	-0.131899	-0.131625
1.229	-0.0420087	-0.0348493	-0.0355398	-0.167704	-0.131055	-0.130925
1.23	-0.0396249	-0.0328192	-0.0349125	-0.165834	-0.130819	-0.129398
1.23	-0.0378662	-0.0309115	-0.0341445	-0.163235	-0.129328	-0.128931
1.231	-0.0368987	-0.0286061	-0.0329697	-0.160796	-0.127901	-0.127334
1.232	-0.0355718	-0.0264375	-0.0316111	-0.158962	-0.127294	-0.127086
1.232	-0.0332877	-0.0239919	-0.0310064	-0.157308	-0.127467	-0.127177
1.233	-0.0312614	-0.022322	-0.0299094	-0.155802	-0.127594	-0.128053
1.234	-0.0292698	-0.0202593	-0.0294407	-0.155279	-0.127535	-0.128647
1.234	-0.0276545	-0.018527	-0.0284069	-0.153823	-0.125822	-0.128486
1.235	-0.0266175	-0.0162635	-0.0266419	-0.152956	-0.125369	-0.127586
1.236	-0.0255615	-0.0155812	-0.0253099	-0.152222	-0.12462	-0.127266
1.236	-0.0240973	-0.0148086	-0.0240688	-0.15155	-0.122785	-0.126333
1.237	-0.0228398	-0.0135056	-0.0228977	-0.150028	-0.121057	-0.125969
1.238	-0.021976	-0.0124361	-0.0216559	-0.148634	-0.120512	-0.124901
1.238	-0.0216216	-0.0106178	-0.0206312	-0.147925	-0.120454	-0.12429
1.239	-0.0213756	-0.00841115	-0.018818	-0.147665	-0.119296	-0.1232
1.24	-0.0211422	-0.00574803	-0.016138	-0.147534	-0.118012	-0.122019
1.24	-0.0204177	-0.00295188	-0.0132968	-0.147726	-0.117388	-0.121029
1.241	-0.0197484	-4.04634e-06	-0.0106889	-0.148618	-0.117426	-0.118861
1.242	-0.0194215	0.00276976	-0.00966739	-0.149672	-0.116907	-0.116449
1.242	-0.0183343	0.00571109	-0.00889365	-0.150991	-0.115443	-0.116834
1.243	-0.017172	0.00814347	-0.00809873	-0.151824	-0.114539	-0.115364
1.244	-0.0154149	0.0094406	-0.00703234	-0.152214	-0.114404	-0.113837
1.244	-0.0132867	0.0115221	-0.00659648	-0.152147	-0.113649	-0.112811
1.245	-0.0125351	0.0148966	-0.0053444	-0.151697	-0.112079	-0.112192
1.246	-0.0122467	0.0171402	-0.00396688	-0.151255	-0.110972	-0.110572
1.246	-0.0112587	0.018382	-0.00257214	-0.151432	-0.109631	-0.110433
1.247	-0.0101815	0.0205406	-0.00214855	-0.15115	-0.108898	-0.108673
1.248	-0.00945131	0.0227726	0.000279617	-0.150639	-0.107518	-0.107676
1.248	-0.00882426	0.0247346	0.000327332	-0.149303	-0.107341	-0.106141
1.249	-0.00827433	0.0274961	0.0003489	-0.1483	-0.105502	-0.104877
1.25	-0.00775234	0.027226	0.00138082	-0.147725	-0.103896	-0.103626
1.25	-0.00733859	0.0274012	0.00139532	-0.146642	-0.103604	-0.102746
1.251	-0.00714656	0.0277731	0.00152428	-0.145212	-0.101505	-0.10189
1.252	-0.00727677	0.0279386	0.000793312	-0.1443	-0.0989274	-0.101017
1.252	-0.00857766	0.0279019	0.00134166	-0.14451	-0.0968505	-0.0995599
1.253	-0.00984566	0.0278024	0.00194583	-0.144435	-0.0956093	-0.0979927
1.254	-0.0112605	0.0264406	0.00257038	-0.145087	-0.0936117	-0.0980877
1.254	-0.011129	0.0260453	0.00219184	-0.145755	-0.0920646	-0.0973654
1.255	-0.0103487	0.0249241	0.00213337	-0.146747	-0.0907281	-0.0969178
1.256	-0.010293	0.0249551	0.00268768	-0.146908	-0.090272	-0.0965082
1.256	-0.00946612	0.0254291	0.00164838	-0.147226	-0.088841	-0.0958841
1.257	-0.00789464	0.0258562	0.000737342	-0.148102	-0.0879005	-0.094529
1.258	-0.00775694	0.02641	0.00106637	-0.148002	-0.0864701	-0.0948513
1.258	-0.00868187	0.02664	0.00201606	-0.148023	-0.0860401	-0.0963589
1.259	-0.00962639	0.02655	0.00236815	-0.148262	-0.0861394	-0.0950905
1.26	-0.0102019	0.0264441	0.00232363	-0.148488	-0.086628	-0.0958963
1.26	-0.0108493	0.0260812	0.00455887	-0.149035	-0.0877581	-0.0971719
1.261	-0.0110218	0.0256929	0.00668162	-0.149678	-0.088466	-0.0977525
1.262	-0.0117556	0.0265242	0.00932169	-0.149733	-0.0886158	-0.0988665
1.262	-0.0123515	0.0250061	0.0111101	-0.149938	-0.089027	-0.099322
1.263	-0.0122594	0.022955	0.0115513	-0.150285	-0.0894951	-0.0992924
1.264	-0.0121604	0.0223586	0.0111719	-0.150155	-0.0900183	-0.0975042
1.264	-0.0122122	0.0217422	0.0118951	-0.150295	-0.0903471	-0.0964808
1.265	-0.0122689	0.0210598	0.0136038	-0.151024	-0.0906246	-0.0955044
1.266	-0.0126713	0.019462	0.0140202	-0.151877	-0.0910955	-0.0940717
1.266	-0.013277	0.0192321	0.0150552	-0.15214	-0.0916091	-0.0924244
1.267	-0.0129524	0.0182257	0.0158794	-0.151185	-0.0920476	-0.092489
1.268	-0.0128485	0.0176446	0.0159242	-0.151016	-0.092188	-0.0914561
1.268	-0.0125635	0.0170095	0.0164431	-0.15187	-0.0921256	-0.0914108
1.269	-0.0118702	0.0166506	0.0170406	-0.151599	-0.0922604	-0.0912328
1.27	-0.0114315	0.0175281	0.0173564	-0.150951	-0.0925281	-0.0922497
1.27	-0.0110562	0.0174579	0.0171564	-0.151056	-0.0933361	-0.0927623
1.271	-0.0101173	0.0166032	0.0162977	-0.15178	-0.0934786	-0.0921697
1.272	-0.00930673	0.0153234	0.015676	-0.152491	-0.0935784	-0.092679
1.272	-0.00852629	0.0149768	0.0153691	-0.152727	-0.0946688	-0.0938354
1.273	-0.00911192	0.0158269	0.0147957	-0.152537	-0.0951953	-0.0936532
1.274	-0.00989612	0.0148212	0.0144458	-0.152435	-0.0953197	-0.0940375
1.274	-0.0104423	0.0128498	0.0139322	-0.152483	-0.0948261	-0.0950255
1.275	-0.0110021	0.0121116	0.0137987	-0.152527	-0.0943511	-0.0957331
1.276	-0.0106033	0.0114795	0.0128394	-0.152737	-0.0944967	-0.0962684
1.276	-0.0107486	0.01036	0.0112907	-0.153001	-0.094893	-0.0965432
1.277	-0.0112379	0.0100372	0.00999952	-0.153101	-0.0945072	-0.0975787
1.278	-0.0119971	0.00957663	0.00935948	-0.152632	-0.0942167	-0.0973396
1.278	-0.0113137	0.00897079	0.00839694	-0.152815	-0.09495	-0.0956432
1.279	-0.0104154	0.00869529	0.00674126	-0.15334	-0.0958511	-0.0951623
1.28	-0.0102239	0.00740815	0.00476161	-0.153539	-0.0972275	-0.0943778
1.28	-0.0104612	0.00575366	0.0032375	-0.153528	-0.0982427	-0.0932492
1.281	-0.0110546	0.00366472	0.000892553	-0.153021	-0.0990624	-0.0928793
1.282	-0.011466	0.00234342	-0.000696021	-0.153622	-0.100546	-0.0932313
1.282	-0.0111466	0.000385817	-0.000320226	-0.155091	-0.102485	-0.0925722
1.283	-0.0105646	0.000759356	-0.00144215	-0.156367	-0.103525	-0.0933911
1.284	-0.00978107	1.83005e-05	-0.00140076	-0.157179	-0.103927	-0.094103
1.284	-0.00976396	-0.000267214	-0.00210089	-0.15788	-0.105545	-0.0933009
1.285	-0.0102547	0.000267141	-0.00305846	-0.158612	-0.107173	-0.0932072
1.286	-0.00963441	-0.00023606	-0.00414102	-0.158919	-0.107469	-0.0943882
1.286	-0.00841059	0.000374167	-0.00533873	-0.159763	-0.108084	-0.095283
1.287	-0.00749852	0.00117859	-0.00682669	-0.160662	-0.10895	-0.0957246
1.288	-0.00678211	0.0013883	-0.00788229	-0.160487	-0.109657	-0.0962988
1.288	-0.0067007	0.00298189	-0.00817789	-0.160168	-0.110868	-0.0967679
1.289	-0.00619135	0.00419798	-0.00911365	-0.160455	-0.111965	-0.0970004
1.29	-0.00570144	0.00482305	-0.0104897	-0.159956	-0.112809	-0.0986174
1.29	-0.0064811	0.0038692	-0.0112233	-0.159314	-0.113809	-0.100066
1.291	-0.00646242	0.0044293	-0.0125303	-0.158746	-0.114588	-0.10045
1.292	-0.00537094	0.00461186	-0.0133942	-0.157727	-0.114661	-0.100575
1.292	-0.00349678	0.003629	-0.0143647	-0.157371	-0.114387	-0.101835
1.293	-0.00209279	0.00333291	-0.0138131	-0.157647	-0.113858	-0.10302
1.294	-0.00125479	0.00252773	-0.0140415	-0.157036	-0.113526	-0.102444
1.294	-0.000314673	0.00189388	-0.0146677	-0.156868	-0.113759	-0.102022
1.295	0.00116947	0.000412469	-0.0156505	-0.157104	-0.113657	-0.102506
1.296	0.00279927	0.00114416	-0.0166627	-0.1574	-0.113706	-0.103901
1.296	0.003492	0.00180369	-0.0171359	-0.15717	-0.113844	-0.105335
1.297	0.00417474	0.00181794	-0.0164906	-0.157918	-0.113862	-0.107489
1.298	0.00549023	0.001808	-0.0163849	-0.158327	-0.113569	-0.10917
1.298	0.00638444	0.00158873	-0.017518	-0.158378	-0.113454	-0.110082
1.299	0.00675819	0.00140051	-0.0190315	-0.158681	-0.112487	-0.111542
1.3	0.00679333	-0.000134457	-0.0219902	-0.158982	-0.11142	-0.11315
1.3	0.00628517	0.000376395	-0.0234428	-0.160903	-0.11077	-0.113926
1.301	0.00720531	0.000412478	-0.0234894	-0.162037	-0.111195	-0.115184
1.302	0.00816778	-0.000224422	-0.0251402	-0.162173	-0.111053	-0.116521
1.302	0.00793547	-0.00119388	-0.0274505	-0.16143	-0.110481	-0.117731
1.303	0.00788033	-0.00133774	-0.0293386	-0.160889	-0.110479	-0.116837
1.304	0.00793973	-0.00146107	-0.0309019	-0.16099	-0.109718	-0.117681
1.304	0.00773656	-0.00107383	-0.0322619	-0.161371	-0.109874	-0.119334
1.305	0.00664877	-0.00097812	-0.0328335	-0.161102	-0.110041	-0.120497
1.306	0.00656698	-0.00085663	-0.0328171	-0.161275	-0.10929	-0.121479
1.306	0.00761191	-0.00299142	-0.0332919	-0.161411	-0.109379	-0.123087
1.307	0.00741837	-0.00450745	-0.0341575	-0.16174	-0.110373	-0.123529
1.308	0.00732085	-0.00601113	-0.0351938	-0.161934	-0.111111	-0.124052
1.308	0.00717885	-0.00732795	-0.035286	-0.161834	-0.112076	-0.124308
1.309	0.00665629	-0.00740717	-0.0347931	-0.160997	-0.113587	-0.124725
1.31	0.00618871	-0.0067643	-0.0348425	-0.16058	-0.113943	-0.126452
1.31	0.00556626	-0.00623568	-0.034664	-0.16025	-0.114778	-0.125949
1.311	0.0048875	-0.00692212	-0.035333	-0.161042	-0.115358	-0.12725
1.312	0.00396707	-0.00806209	-0.0358499	-0.162276	-0.115649	-0.129739
1.312	0.0037626	-0.00883054	-0.0355649	-0.162535	-0.115255	-0.130412
1.313	0.00402964	-0.00886103	-0.0356017	-0.162496	-0.114069	-0.131589
1.314	0.00443913	-0.00827847	-0.0355024	-0.163369	-0.113224	-0.133493
1.314	0.00481514	-0.00794684	-0.0358736	-0.16439	-0.113101	-0.134904
1.315	0.00494606	-0.00721125	-0.03596	-0.164686	-0.112639	-0.136126
1.316	0.00472253	-0.00657029	-0.0375551	-0.164512	-0.111786	-0.138285
1.316	0.00399425	-0.0064029	-0.0391372	-0.164619	-0.11131	-0.139162
1.317	0.00320294	-0.00632377	-0.0401527	-0.16528	-0.112121	-0.140392
1.318	0.0028624	-0.00647659	-0.0409183	-0.166438	-0.111556	-0.141595
1.318	0.00288126	-0.0073577	-0.0406748	-0.167436	-0.110522	-0.141494
1.319	0.00239426	-0.00703373	-0.0407636	-0.16778	-0.110748	-0.14217
1.32	0.00165543	-0.00754073	-0.0410068	-0.16867	-0.111027	-0.143383
1.32	0.000507653	-0.00732719	-0.0413684	-0.16903	-0.110792	-0.144237
1.321	0.000329393	-0.00700165	-0.042292	-0.168967	-0.110738	-0.144964
1.322	-0.00144435	-0.00649817	-0.0438147	-0.169404	-0.110869	-0.146077
1.322	-0.00246042	-0.00727948	-0.0454831	-0.170013	-0.111168	-0.146946
1.323	-0.00353191	-0.00808953	-0.0446669	-0.17095	-0.111075	-0.147312
1.324	-0.00401317	-0.0082758	-0.0443473	-0.171348	-0.111884	-0.14825
1.324	-0.00484015	-0.00970929	-0.0447794	-0.172044	-0.112676	-0.149375
1.325	-0.00617415	-0.0110037	-0.0455627	-0.174145	-0.112607	-0.150346
1.326	-0.00720052	-0.011533	-0.0463592	-0.175111	-0.112896	-0.151371
1.326	-0.00815667	-0.0119677	-0.0481102	-0.175021	-0.113415	-0.151413
1.327	-0.0089255	-0.0128014	-0.0495569	-0.175939	-0.112931	-0.152201
1.328	-0.0100021	-0.0130629	-0.0516013	-0.175367	-0.11233	-0.153881
1.328	-0.0112594	-0.0136837	-0.0524191	-0.174296	-0.112841	-0.154231
[truncated: 36,706 more rows]

## Sheet: Figure C
Figure 1C:Protein concentration optimization by Dynamic Light Scattering (DLS)
Hydrodynmic radius (rh, nm)	Volume Density (%)
	1 mg/mL (in PBS)	Formulation (100 mg/mL)	Formulation (50 mg/mL)	Formulation (1 mg/mL)
0.2	0	0	0	0
0.2316	0	0	0	0
0.2682	0	0	0	0
0.3106	0	0	0	0
0.3597	0	0	0	0
0.4166	0	0	0	0
0.4825	0	0	0	0
0.5587	0	0	0	0
0.647	0	0	0	0
0.7493	0	0	0	0
0.8678	0	0	0	0
1.005	0	0	0	0
1.164	0	0	0	0
1.348	0	0	0	0
1.561	0	0	0	0
1.808	0	2.9	0	0
2.093	0	11.1	2.8	0
2.424	0	19.5	12.5	2.8
2.807	3.6	21.7	23.8	11.2
3.251	14	18.3	26.4	20.4
3.765	23.7	12.6	19.6	23.3
4.36	23.9	7.5	10.4	19.4
5.05	17.2	3.8	3.7	12.7
5.848	9.8	1.7	0.8	6.6
6.772	4.7	0.6	0.1	2.7
7.843	1.9	0.2	0	0.8
9.083	0.7	0	0	0.1
10.52	0.2	0	0	0
12.18	0	0	0	0
14.11	0	0	0	0
16.34	0	0	0	0
18.92	0	0	0	0
21.91	0	0	0	0
25.37	0	0	0	0
29.39	0	0	0	0
34.03	0	0	0	0
39.41	0	0	0	0
45.64	0	0	0	0
52.85	0	0	0	0
61.21	0	0	0	0
70.89	0	0	0	0
82.09	0	0	0	0
95.07	0	0	0	0
110.1	0	0	0	0
127.5	0	0	0	0
147.7	0	0	0	0
171	0	0	0	0
198	0	0	0	0
229.3	0	0	0	0
265.6	0	0	0	0
307.6	0	0	0	0
356.2	0	0	0	0
412.5	0	0	0	0
477.7	0	0	0	0
553.2	0	0	0	0
640.7	0	0	0	0
741.9	0	0	0	0
859.2	0	0	0	0
995.1	0	0	0	0
1152	0	0	0	0
1335	0	0	0	0
1545	0	0	0	0
1790	0	0	0	0
2073	0	0	0	0
2400	0	0	0	0
2780	0.1	0	0	0
3219	0	0	0	0
3728	0	0	0	0
4317	0	0	0	0
5000	0	0	0	0
