# Supplementary material for: Development and biophysical characterization of a humanized FSH–blocking monoclonal antibody therapeutic formulated at an ultra-high concentration
Source: eLife. 2023 Jun 19;12:e88898. doi: 10.7554/eLife.88898 (PMC10325703; doi:10.7554/eLife.88898)
Supplement: Figure 2—source data 1. [file elife-88898-fig2-data1.xlsx]

## Sheet: Figure 2A
Figure 2A: Effect of antioxidant and chelating agent on thermostability of Formulated MS-Hu6
8.621 mg/mL (in PBS)						Formulation (100 mg/mL)				Formulation with 1 mM EDTA and 1 mM L-Methionine (100 mg/mL)
Replicate 1		Replicate 2		Replicate 3		Replicate 1		Replicate 2		Replicate 1		Replicate 2		Replicate 3
Temp (°C)	dF/dT	Temp (°C)	dF/dT	Temp (°C)	dF/dT	Temp (°C)	dF/dT	Temp (°C)	dF/dT	Temp (°C)	dF/dT	Temp (°C)	dF/dT	Temp (°C)	dF/dT
28.3798	-174.714	28.3798	-103.033	28.3783	-133.72	28.3845	-23083.6	28.3845	-24007.2	28.3783	-9004.46	28.3808	-13038.2	28.3808	-18775.3
28.6795	-171.624	28.6795	-98.7482	28.6783	-131.215	28.6843	-22938.9	28.6843	-23972	28.6783	-8972.26	28.6804	-13689.3	28.6804	-19019.2
28.9796	-170.39	28.9796	-99.4516	28.9785	-129.74	28.9844	-23127.1	28.9844	-23912.1	28.9785	-8942.21	28.9802	-13972.5	28.9802	-19301.2
29.2801	-168.982	29.2801	-102.069	29.2791	-131.174	29.2846	-22809.5	29.2846	-23923.1	29.2791	-8981.92	29.2804	-14095.5	29.2804	-19225.5
29.5811	-168.911	29.5811	-106.609	29.5798	-133.527	29.585	-22380.1	29.585	-23733.1	29.5798	-9053.7	29.5807	-14610.5	29.5807	-19335.9
29.8821	-171.974	29.8821	-111.26	29.8804	-136.356	29.8853	-22265.3	29.8853	-23672.8	29.8804	-9133.46	29.8809	-14889.9	29.8809	-19331.4
30.1828	-174.57	30.1828	-114.863	30.181	-140.782	30.1853	-21821.2	30.1853	-23396.5	30.181	-9242.72	30.1809	-15101.8	30.1809	-19439
30.4831	-177.806	30.4831	-117.321	30.4814	-143	30.4851	-21586.9	30.4851	-23284.3	30.4814	-9363.4	30.4808	-15367.4	30.4808	-19285.4
30.7834	-179.273	30.7834	-122.265	30.7819	-145.973	30.7851	-21360.4	30.7851	-23071.8	30.7819	-9420.09	30.7809	-15614.4	30.7809	-19264.1
31.0835	-183.196	31.0835	-125.365	31.082	-150.768	31.085	-21392.8	31.085	-23033	31.082	-9667.36	31.0809	-15991.7	31.0809	-19241.8
31.383	-187.172	31.383	-131.272	31.3814	-152.199	31.3843	-20911.2	31.3843	-22900.1	31.3814	-9900.5	31.3804	-16289.6	31.3804	-19198.4
31.6822	-189.221	31.6822	-137.197	31.6806	-156.106	31.6835	-20781.1	31.6835	-22595.9	31.6806	-10064.3	31.6798	-15865.6	31.6798	-19096
31.9811	-191.064	31.9811	-140.264	31.9797	-158.336	31.9826	-20379.1	31.9826	-22479.8	31.9797	-10180.8	31.9791	-15985.7	31.9791	-18999.2
32.2795	-195.183	32.2795	-142.84	32.2784	-160.974	32.2811	-20268.9	32.2811	-22326.2	32.2784	-10365	32.2779	-16132.9	32.2779	-18924.2
32.5772	-198.36	32.5772	-142.818	32.5763	-162.069	32.5791	-20437.8	32.5791	-22199	32.5763	-10481.9	32.5761	-16041.8	32.5761	-18642.4
32.8746	-199.708	32.8746	-146.167	32.8743	-165.823	32.877	-20107	32.877	-21967.2	32.8743	-10613	32.8742	-16081.3	32.8742	-18389.4
33.1723	-200.828	33.1723	-150.679	33.1727	-165.603	33.1752	-19943	33.1752	-21842.9	33.1727	-10660.9	33.1728	-16345.5	33.1728	-18162.5
33.4705	-200.826	33.4705	-152.525	33.4713	-171.031	33.4736	-19846.4	33.4736	-21650.2	33.4713	-10645.9	33.4716	-16343.4	33.4716	-18074.9
33.7688	-202.222	33.7688	-153.002	33.77	-172.621	33.7717	-19618.9	33.7717	-21426	33.77	-10611.3	33.7704	-16212.6	33.7704	-17922.5
34.0675	-201.462	34.0675	-154.639	34.069	-172.65	34.0698	-19273.5	34.0698	-21219.4	34.069	-10596.4	34.0693	-15866.7	34.0693	-17665.6
34.367	-200.984	34.367	-154.972	34.3688	-174.532	34.3685	-19260.6	34.3685	-20975.1	34.3688	-10486.6	34.3689	-15634.1	34.3689	-17555.4
34.6672	-202.353	34.6672	-156.379	34.6692	-175.773	34.6679	-18849.6	34.6679	-20967	34.6692	-10414.9	34.6691	-16020.4	34.6691	-17414.5
34.9668	-204.296	34.9668	-159.714	34.9689	-179.553	34.9669	-18617	34.9669	-20974.5	34.9689	-10502.5	34.9686	-15804.5	34.9686	-17281.3
35.2663	-203.194	35.2663	-159.804	35.2685	-181.335	35.2658	-18681.2	35.2658	-20808.1	35.2685	-10406.6	35.2681	-15785.6	35.2681	-17125.5
35.5668	-202.046	35.5668	-162.402	35.569	-185.612	35.5658	-18342.1	35.5658	-20593	35.569	-10260.1	35.5685	-15655.1	35.5685	-17135.4
35.8675	-202.189	35.8675	-162.515	35.8696	-188.247	35.8661	-18681.7	35.8661	-20550.8	35.8696	-10149.2	35.8692	-15459.8	35.8692	-17089.8
36.1683	-202.248	36.1683	-160.888	36.1702	-191.661	36.1664	-18287.2	36.1664	-20421.2	36.1702	-10093.8	36.1698	-14988.9	36.1698	-16897.3
36.4692	-202.597	36.4692	-160.519	36.4709	-189.73	36.467	-17935.1	36.467	-20326.6	36.4709	-10012.9	36.4706	-14606.3	36.4706	-16744.9
36.7701	-202.317	36.7701	-161.817	36.7717	-190.15	36.768	-17902.7	36.768	-20274.8	36.7717	-10038.8	36.7715	-14385.8	36.7715	-16616.5
37.0713	-202.249	37.0713	-161.423	37.0729	-189.372	37.0695	-17782.1	37.0695	-20212	37.0729	-9941.07	37.0729	-14396.8	37.0729	-16577.6
37.3722	-202.179	37.3722	-160.426	37.3738	-193.223	37.3709	-17674	37.3709	-20162	37.3738	-9899.23	37.3741	-14425.8	37.3741	-16445.9
37.6727	-201.144	37.6727	-159.625	37.6743	-192.567	37.6719	-17739.1	37.6719	-20046.3	37.6743	-9887.93	37.6749	-13982.2	37.6749	-16241.4
37.9745	-198.617	37.9745	-157.06	37.9762	-191.992	37.9741	-17455.7	37.9741	-19661.3	37.9762	-9702.06	37.9771	-13736.7	37.9771	-15969.1
38.2776	-199.348	38.2776	-158.059	38.2793	-191.128	38.2776	-16974.1	38.2776	-19467.1	38.2793	-9637.91	38.2805	-13503.9	38.2805	-15935.7
38.5803	-198.279	38.5803	-155.541	38.582	-185.775	38.5806	-16852.8	38.5806	-19421	38.582	-9620.48	38.5836	-13341.8	38.5836	-15750.5
38.8829	-196.574	38.8829	-153.944	38.8846	-184.356	38.8833	-16321	38.8833	-19213.7	38.8846	-9531.74	38.8864	-13337.9	38.8864	-15619.6
39.1853	-195.194	39.1853	-153.091	39.1871	-183.518	39.1859	-16610	39.1859	-19018.4	39.1871	-9426.9	39.1892	-13497.9	39.1892	-15603.6
39.4874	-194.076	39.4874	-152.378	39.4892	-182.596	39.4882	-16750.5	39.4882	-18917.7	39.4892	-9430.45	39.4915	-13464.4	39.4915	-15434.3
39.7892	-194.059	39.7892	-149.727	39.7908	-183.075	39.7901	-16837.6	39.7901	-18753.7	39.7908	-9297.05	39.7934	-13332.4	39.7934	-15282.9
40.0904	-193.348	40.0904	-147.844	40.0919	-182.626	40.0914	-16957.1	40.0914	-18542.7	40.0919	-9219.41	40.0948	-13091.2	40.0948	-15090.2
40.3913	-191.49	40.3913	-145.459	40.3926	-178.048	40.3923	-16734.2	40.3923	-18378.8	40.3926	-9134.59	40.3958	-12817.7	40.3958	-14943.9
40.6924	-190.758	40.6924	-140.941	40.6935	-179.613	40.6933	-16601.8	40.6933	-18124.7	40.6935	-9033.61	40.6968	-12880.7	40.6968	-14885.9
40.9928	-190.851	40.9928	-136.255	40.9937	-177.986	40.9936	-16593.8	40.9936	-18096.2	40.9937	-8949.35	40.9972	-12984.6	40.9972	-14850.6
41.2925	-187.975	41.2925	-131.147	41.2932	-179.558	41.2932	-16740.3	41.2932	-17909.7	41.2932	-8827.94	41.2967	-12860.9	41.2967	-14653.7
41.5924	-187.5	41.5924	-128.678	41.5929	-182.705	41.5931	-16713.7	41.5931	-17671	41.5929	-8746.85	41.5965	-12756.9	41.5965	-14522.6
41.8924	-187.302	41.8924	-124.615	41.8927	-180.95	41.893	-16676.4	41.893	-17494.8	41.8927	-8700.16	41.8962	-12477.7	41.8962	-14379.8
42.1923	-187.268	42.1923	-121.501	42.1924	-178.46	42.1928	-16279.8	42.1928	-17381.3	42.1924	-8648.57	42.1958	-12116.3	42.1958	-14205.7
42.4923	-184.107	42.4923	-115.965	42.4923	-178.875	42.4929	-16025.5	42.4929	-17109.2	42.4923	-8504.93	42.4957	-11998.3	42.4957	-14122.8
42.7924	-181.029	42.7924	-112.472	42.7923	-176.801	42.7929	-15672.7	42.7929	-16938.5	42.7923	-8463.29	42.7956	-12046.5	42.7956	-14043.2
43.0927	-178.095	43.0927	-108.715	43.0925	-177.421	43.0931	-15368.8	43.0931	-16715.9	43.0925	-8378.06	43.0957	-12046.4	43.0957	-14019.8
43.3934	-176.68	43.3934	-105.705	43.393	-177.813	43.3937	-15160.9	43.3937	-16433.9	43.393	-8289.51	43.3961	-12177.6	43.3961	-13919
43.694	-173.246	43.694	-104.42	43.6935	-175.902	43.6942	-14963.7	43.6942	-16204	43.6935	-8206.98	43.6965	-11818.5	43.6965	-13806.9
43.9944	-170.196	43.9944	-103.265	43.9939	-173.71	43.9946	-15050.3	43.9946	-15881.9	43.9939	-8169.05	43.9967	-11483.1	43.9967	-13682.4
44.2945	-167.469	44.2945	-99.8409	44.2939	-168.107	44.2947	-14828.4	44.2947	-15644.8	44.2939	-8123.54	44.2966	-11381.8	44.2966	-13537.8
44.5943	-164.529	44.5943	-96.0333	44.5937	-164.743	44.5945	-14478.7	44.5945	-15358.4	44.5937	-8025.83	44.5962	-11262.9	44.5962	-13407
44.894	-162.345	44.894	-93.0445	44.8934	-163.906	44.8941	-14231.7	44.8941	-15042.8	44.8934	-7893.7	44.8958	-11203.7	44.8958	-13264.5
45.1938	-158.3	45.1938	-89.4368	45.1931	-164.587	45.1939	-14008.4	45.1939	-14688.4	45.1931	-7733.66	45.1955	-11160.2	45.1955	-13088.2
45.4934	-158.706	45.4934	-88.1702	45.4927	-162.181	45.4934	-13913.2	45.4934	-14432.7	45.4927	-7665.47	45.4951	-10986.5	45.4951	-12917.1
45.7931	-155.755	45.7931	-84.3236	45.7923	-159.995	45.7929	-13743.1	45.7929	-14150.1	45.7923	-7523.86	45.7946	-10709.9	45.7946	-12681.5
46.0929	-153.806	46.0929	-80.8294	46.0921	-156.309	46.0926	-13419.5	46.0926	-13875.6	46.0921	-7392.56	46.0944	-10406.3	46.0944	-12402.1
46.3927	-151.676	46.3927	-77.902	46.392	-152.609	46.3923	-13350.6	46.3923	-13707.6	46.392	-7295.46	46.3943	-10054.5	46.3943	-12148.2
46.6926	-151.047	46.6926	-73.5464	46.6918	-149.117	46.692	-13172.8	46.692	-13560.1	46.6918	-7186.29	46.6941	-10150.7	46.6941	-11939.4
46.9924	-149.389	46.9924	-70.1583	46.9915	-147.203	46.9917	-12783.6	46.9917	-13419.7	46.9915	-7041.9	46.9939	-10092.7	46.9939	-11770.3
47.2925	-148.99	47.2925	-67.7945	47.2916	-146.862	47.2917	-12492.3	47.2917	-13298.2	47.2916	-6948.07	47.294	-9932.33	47.294	-11609.4
47.5929	-147.063	47.5929	-66.2464	47.5918	-145.49	47.592	-12398.9	47.592	-13262.8	47.5918	-6890.19	47.5943	-9805.93	47.5943	-11484.1
47.8934	-142.381	47.8934	-64.1947	47.8922	-142.971	47.8924	-12195.8	47.8924	-13212.9	47.8922	-6833.15	47.8948	-9601.16	47.8948	-11378.9
48.1939	-140.52	48.1939	-61.6103	48.1927	-140.637	48.1927	-12223.1	48.1927	-13233.8	48.1927	-6878.18	48.1953	-9577.12	48.1953	-11300
48.4945	-136.008	48.4945	-59.1752	48.4932	-138.614	48.4934	-11940.8	48.4934	-13194.9	48.4932	-6809.2	48.4959	-9525.64	48.4959	-11249.5
48.7952	-135.451	48.7952	-58.3484	48.7939	-138.084	48.7941	-11854.2	48.7941	-13172.2	48.7939	-6807.21	48.7966	-9427.37	48.7966	-11271.9
49.0955	-133.992	49.0955	-56.3359	49.0941	-137.146	49.0944	-11931.6	49.0944	-13221.2	49.0941	-6831.02	49.0969	-9522.69	49.0969	-11285.6
49.3954	-130.655	49.3954	-53.2914	49.3941	-136.734	49.3945	-11729.9	49.3945	-13130.2	49.3941	-6840.7	49.3968	-9499.65	49.3968	-11359
49.6954	-127.196	49.6954	-52.6213	49.694	-134.314	49.6946	-11499.6	49.6946	-13094.7	49.694	-6818.9	49.6969	-9328.66	49.6969	-11333
49.9956	-123.256	49.9956	-49.9571	49.9943	-131.959	49.995	-11353.1	49.995	-13117.2	49.9943	-6836.7	49.9972	-9279.36	49.9972	-11266
50.2957	-119.242	50.2957	-49.0893	50.2944	-130.379	50.2952	-11420.9	50.2952	-13124.2	50.2944	-6803.57	50.2974	-9269.46	50.2974	-11291.2
50.5954	-116.04	50.5954	-45.2196	50.5942	-128.446	50.5952	-11422.1	50.5952	-13012.6	50.5942	-6738.82	50.5973	-9227.94	50.5973	-11274.2
50.8949	-114.965	50.8949	-41.4653	50.8939	-126.216	50.895	-11541.9	50.895	-13006.4	50.8939	-6732.68	50.897	-9286.03	50.897	-11233.4
51.1944	-111.086	51.1944	-39.0997	51.1936	-121.655	51.1948	-11367.9	51.1948	-12899.2	51.1936	-6635.17	51.1967	-9052.27	51.1967	-11233.1
51.4939	-107.735	51.4939	-35.3515	51.4933	-118.371	51.4946	-11429.9	51.4946	-12852.7	51.4933	-6641.62	51.4963	-9121.57	51.4963	-11162.5
51.7937	-102.406	51.7937	-30.5115	51.7932	-114.189	51.7947	-11312.5	51.7947	-12769	51.7932	-6566.74	51.7962	-9222.3	51.7962	-11024.9
52.0938	-97.2477	52.0938	-28.4982	52.0935	-110.568	52.0952	-11159.1	52.0952	-12671.6	52.0935	-6518.42	52.0965	-9139.6	52.0965	-10913.5
52.3942	-93.0097	52.3942	-26.0399	52.3941	-106.159	52.3957	-11211.6	52.3957	-12719.5	52.3941	-6448.16	52.397	-9123.95	52.397	-10791.6
52.6946	-86.9293	52.6946	-21.0946	52.6945	-103.918	52.6962	-11321	52.6962	-12671.4	52.6945	-6426.84	52.6973	-9138.97	52.6973	-10776.8
52.9948	-82.1224	52.9948	-16.9396	52.9948	-101.797	52.9965	-11321.2	52.9965	-12559.6	52.9948	-6377.82	52.9974	-9052.81	52.9974	-10767.3
53.295	-75.9843	53.295	-11.5066	53.295	-96.7067	53.2966	-11119.5	53.2966	-12433	53.295	-6366.03	53.2975	-8901.53	53.2975	-10676.4
53.5953	-70.4526	53.5953	-8.86069	53.5953	-91.367	53.5968	-11085.5	53.5968	-12421.4	53.5953	-6364.48	53.5977	-8768.02	53.5977	-10591
53.8957	-62.8988	53.8957	-5.94777	53.8955	-84.8028	53.897	-10953.6	53.897	-12284.4	53.8955	-6315.16	53.8979	-8699.26	53.8979	-10493.5
54.1959	-56.9731	54.1959	-1.33775	54.1956	-80.9974	54.1969	-11054.2	54.1969	-12226.9	54.1956	-6308.55	54.1979	-8708.25	54.1979	-10336.4
54.496	-51.2976	54.496	2.23294	54.4954	-75.9331	54.4965	-10934.2	54.4965	-12128	54.4954	-6229.7	54.4976	-8558.95	54.4976	-10248.1
54.7959	-45.1923	54.7959	5.47938	54.7949	-68.5405	54.796	-11043.3	54.796	-11996.5	54.7949	-6203.44	54.7972	-8281.68	54.7972	-10234.4
55.0955	-38.5778	55.0955	12.1084	55.0941	-59.8559	55.0951	-10988.5	55.0951	-11892.8	55.0941	-6147.02	55.0964	-8192.84	55.0964	-10226.9
55.395	-31.5523	55.395	17.8359	55.3934	-52.9589	55.3945	-10891.1	55.3945	-11696.8	55.3934	-6077.45	55.3957	-8063.56	55.3957	-10103.9
55.6946	-26.3485	55.6946	23.627	55.6927	-42.6139	55.6939	-10750	55.6939	-11539.3	55.6927	-6010.73	55.6951	-7815.3	55.6951	-9935.89
55.994	-19.1019	55.994	28.356	55.9919	-29.8332	55.9931	-10661.7	55.9931	-11437.8	55.9919	-5966.43	55.9944	-7596.24	55.9944	-9760.46
56.2937	-11.6231	56.2937	36.4222	56.2914	-17.6899	56.2927	-10672.2	56.2927	-11302.9	56.2914	-5873.61	56.2938	-7706.64	56.2938	-9643.13
56.5936	-2.6066	56.5936	46.1969	56.5912	-3.28477	56.5926	-10464	56.5926	-11160.3	56.5912	-5808.47	56.5936	-7684.06	56.5936	-9526.36
56.8935	5.41901	56.8935	57.0136	56.8911	10.5324	56.8927	-10326.4	56.8927	-11041	56.8911	-5740.93	56.8936	-7590.84	56.8936	-9430.7
57.1938	15.7838	57.1938	68.7333	57.1915	29.2036	57.1932	-10118	57.1932	-10895.3	57.1915	-5649.28	57.1939	-7534.05	57.1939	-9357.04
57.4941	27.9431	57.4941	83.1207	57.4921	50.446	57.4939	-9979.08	57.4939	-10773.7	57.4921	-5590.02	57.4944	-7320.98	57.4944	-9229.64
57.7945	41.1389	57.7945	98.7742	57.7927	71.3436	57.7946	-9653.66	57.7946	-10680.4	57.7927	-5501.86	57.795	-7274.89	57.795	-9040.03
58.095	55.2339	58.095	116.026	58.0935	93.6949	58.0954	-9523.26	58.0954	-10556.7	58.0935	-5404.43	58.0957	-7105.08	58.0957	-8846.05
58.3952	70.7798	58.3952	136.38	58.3941	123.029	58.3958	-9369.67	58.3958	-10458.8	58.3941	-5335.61	58.3962	-7083.11	58.3962	-8770.29
58.6956	90.5898	58.6956	157.283	58.6948	153.254	58.6964	-9327.07	58.6964	-10376.2	58.6948	-5242.99	58.6968	-7064.01	58.6968	-8637.54
58.9963	111.83	58.9963	184.368	58.9959	187.071	58.9974	-9225.85	58.9974	-10239.5	58.9959	-5124.8	58.9977	-7288.95	58.9977	-8554.85
59.2968	136.76	59.2968	211.885	59.2968	226.5	59.2982	-9039.38	59.2982	-10148.7	59.2968	-5038.38	59.2986	-7004.28	59.2986	-8431.45
59.5971	164.007	59.5971	243.856	59.5974	271.402	59.5988	-9019.67	59.5988	-10005.2	59.5974	-4922.15	59.5991	-6902.48	59.5991	-8251.4
59.8974	196.811	59.8974	278.96	59.8979	320.865	59.8993	-8791.19	59.8993	-9919.2	59.8979	-4813.53	59.8996	-6757.7	59.8996	-8062.86
60.1974	233.064	60.1974	320.861	60.1982	377.133	60.1996	-8677.6	60.1996	-9783.92	60.1982	-4714.64	60.1998	-6698.06	60.1998	-7875.02
60.4975	274.3	60.4975	366.025	60.4984	441.046	60.4998	-8507.8	60.4998	-9645.12	60.4984	-4587.79	60.5	-6640.77	60.5	-7717.38
60.7975	321.248	60.7975	420.171	60.7987	513.887	60.8001	-8435	60.8001	-9455.31	60.7987	-4489.88	60.8002	-6637.88	60.8002	-7604.21
61.0976	375.038	61.0976	478.646	61.0989	598.906	61.1004	-8304.61	61.1004	-9252.74	61.0989	-4397.68	61.1004	-6556.13	61.1004	-7423.53
61.3978	435.569	61.3978	545.517	61.3992	691.98	61.4008	-8127.39	61.4008	-9009.36	61.3992	-4281.53	61.4008	-6339.66	61.4008	-7193.19
61.6979	503.312	61.6979	624.691	61.6993	797.502	61.7011	-7795.09	61.7011	-8735.86	61.6993	-4132.42	61.701	-6335.08	61.701	-7004.48
61.9977	578.705	61.9977	707.209	61.9991	912.438	62.0011	-7548.68	62.0011	-8443.2	61.9991	-3995.76	62.0009	-5956.87	62.0009	-6747.44
62.2974	662.091	62.2974	802.365	62.2987	1043.65	62.3009	-7293.54	62.3009	-8119.34	62.2987	-3826.38	62.3007	-5710.43	62.3007	-6422.09
62.5972	756.587	62.5972	909.953	62.5983	1187.49	62.6006	-6853.67	62.6006	-7795.98	62.5983	-3643.07	62.6004	-5477	62.6004	-6115.02
62.897	860.507	62.897	1028	62.8979	1353.55	62.9003	-6606.91	62.9003	-7384.2	62.8979	-3435.47	62.9002	-5223.04	62.9002	-5801.58
63.1969	974.869	63.1969	1156.15	63.1977	1535.91	63.2001	-6081.12	63.2001	-6969.41	63.1977	-3181.51	63.2001	-4821.67	63.2001	-5420.6
63.4968	1101.25	63.4968	1304.85	63.4974	1728.76	63.5	-5635.6	63.5	-6498.81	63.4974	-2919.61	63.5	-4600.55	63.5	-4960.71
63.7967	1239.28	63.7967	1462.71	63.7972	1942.41	63.7998	-5135.24	63.7998	-6012.8	63.7972	-2611.31	63.7999	-4191.8	63.7999	-4403.16
64.0968	1390.57	64.0968	1640.76	64.097	2180.07	64.0998	-4491.2	64.0998	-5493.2	64.097	-2289.76	64.0999	-3715.29	64.0999	-3816.04
64.3968	1554.03	64.3968	1835	64.3968	2438.83	64.3996	-3970.83	64.3996	-4977.73	64.3968	-1951.64	64.3997	-3246.32	64.3997	-3198.74
64.6968	1727.88	64.6968	2033.59	64.6968	2718.17	64.6994	-3407.95	64.6994	-4382.62	64.6968	-1618.94	64.6995	-2546.68	64.6995	-2569.94
64.9971	1914.38	64.9971	2262.83	64.997	3021.04	64.9995	-2726.53	64.9995	-3733.82	64.997	-1239.51	64.9996	-2027.85	64.9996	-1869.61
65.2974	2113.67	65.2974	2504.35	65.2973	3334.06	65.2997	-2109.25	65.2997	-3080.38	65.2973	-852.298	65.2999	-1618.75	65.2999	-1193.9
65.5978	2323.92	65.5978	2754.38	65.5978	3661.95	65.6	-1470.48	65.6	-2344.55	65.5978	-441.794	65.6002	-984.524	65.6002	-531.603
65.898	2542.04	65.898	3022.98	65.8982	4002.39	65.9003	-734.979	65.9003	-1671.86	65.8982	-34.5913	65.9005	-392.274	65.9005	266.042
66.1981	2771.44	66.1981	3301.97	66.1984	4357.46	66.2005	-93.6719	66.2005	-920.744	66.1984	387.7	66.2007	206.407	66.2007	1033.95
66.4981	3005.01	66.4981	3577.6	66.4986	4723.6	66.5005	627.878	66.5005	-106.146	66.4986	815.218	66.5008	1096.2	66.5008	1794.13
66.7981	3239.11	66.7981	3867.65	66.7988	5098.91	66.8005	1398.37	66.8005	623.16	66.7988	1252.43	66.8009	1891.76	66.8009	2586.95
67.098	3474.95	67.098	4152.75	67.0988	5453.73	67.1004	2151.47	67.1004	1403.44	67.0988	1736.15	67.101	2448.25	67.101	3274.66
67.398	3707.39	67.398	4422.59	67.3988	5807.86	67.4004	3051.59	67.4004	2258.18	67.3988	2227.18	67.4011	3042.51	67.4011	4004
67.6979	3928.66	67.6979	4691.47	67.6988	6131.5	67.7004	3809.37	67.7004	2995.79	67.6988	2709.03	67.7012	3578.14	67.7012	4754.74
67.9975	4128.01	67.9975	4920.85	67.9986	6426.39	68.0002	4536.69	68.0002	3649.51	67.9986	3159.93	68.001	4185.02	68.001	5451.55
68.2972	4295.07	68.2972	5115.48	68.2984	6668.84	68.3	5322.73	68.3	4350.44	68.2984	3586.94	68.3008	4780.15	68.3008	6094.11
68.5969	4426.81	68.5969	5273.42	68.598	6870.67	68.5997	5971.87	68.5997	4934.72	68.598	3971.7	68.6005	5212.04	68.6005	6745.22
68.8967	4517.15	68.8967	5358.31	68.8978	6992.64	68.8994	6468.55	68.8994	5556.25	68.8978	4341.97	68.9003	5607.04	68.9003	7166.23
69.1966	4548.19	69.1966	5379.95	69.1975	7016.23	69.1991	6889.87	69.1991	5949.3	69.1975	4575.67	69.2001	5897.97	69.2001	7539.21
69.4964	4520.9	69.4964	5345.24	69.4972	6963.52	69.4988	7109.14	69.4988	6158.24	69.4972	4758.63	69.4998	5854.56	69.4998	7736.6
69.7962	4433.58	69.7962	5222.63	69.7969	6775.19	69.7985	7185.35	69.7985	6255.78	69.7969	4796.47	69.7995	5806.69	69.7995	7720.24
70.096	4271.33	70.096	5012.85	70.0966	6504.33	70.0982	6954.48	70.0982	6095.63	70.0966	4675.06	70.0991	5723.11	70.0991	7644.35
70.3957	4038.49	70.3957	4727.97	70.3962	6115.85	70.3977	6548.02	70.3977	5716.2	70.3962	4434.41	70.3986	5409.34	70.3986	7240.84
70.6955	3742.58	70.6955	4356.3	70.6959	5650.91	70.6972	5918.52	70.6972	5243.51	70.6959	4072.82	70.6981	4951.44	70.6981	6698.79
70.9955	3405.85	70.9955	3941.85	70.9958	5077.53	70.997	5214.59	70.997	4557.82	70.9958	3607.55	70.9979	4325.68	70.9979	5927.79
71.2954	3031.67	71.2954	3467.79	71.2957	4488.32	71.2968	4186.53	71.2968	3581.51	71.2957	3038.86	71.2976	3689.52	71.2976	5022.2
71.5952	2628.49	71.5952	2955.29	71.5954	3834.77	71.5965	3051.53	71.5965	2500.66	71.5954	2383.86	71.5972	2900.13	71.5972	3941.27
71.8949	2208.55	71.8949	2479.66	71.8952	3184.99	71.8962	1870.28	71.8962	1241.83	71.8952	1617.3	71.8968	2049.52	71.8968	2832.95
72.1948	1804.77	72.1948	2009.79	72.1951	2565.04	72.196	560.45	72.196	-33.2391	72.1951	890.809	72.1965	1000.53	72.1965	1604.35
72.4947	1422.78	72.4947	1544.15	72.4951	1959.09	72.4959	-616.444	72.4959	-1373.4	72.4951	114.124	72.4964	94.4602	72.4964	427.575
72.7946	1076.49	72.7946	1117.13	72.7951	1443.97	72.7958	-1772.03	72.7958	-2587.05	72.7951	-565.592	72.7963	-880.561	72.7963	-758.959
73.0947	779.466	73.0947	764.413	73.0951	981.453	73.0959	-2820.62	73.0959	-3638.68	73.0951	-1155.49	73.0963	-1749	73.0963	-1921.33
73.3947	543.222	73.3947	483.54	73.3951	621.014	73.396	-3851.05	73.396	-4660.28	73.3951	-1682.9	73.3963	-2474.44	73.3963	-2797.84
73.6947	373.763	73.6947	297.999	73.6949	341.329	73.6958	-4486.79	73.6958	-5569.81	73.6949	-2102.09	73.6961	-3133.04	73.6961	-3572.31
73.9944	252.886	73.9944	148.048	73.9946	192.949	73.9955	-5175.65	73.9955	-6222.46	73.9946	-2409.87	73.9959	-3690.35	73.9959	-4133.44
74.2944	198.44	74.2944	91.102	74.2945	117.019	74.2953	-5475.81	74.2953	-6567.98	74.2945	-2601.67	74.2958	-4188.11	74.2958	-4492.27
74.5946	202.279	74.5946	115.147	74.5946	128.562	74.5955	-5579.05	74.5955	-6755.23	74.5946	-2663.76	74.596	-4490.87	74.596	-4645.01
74.895	266.36	74.895	139.224	74.8948	201.814	74.8956	-5438.86	74.8956	-6773.73	74.8948	-2585.41	74.8962	-4472.44	74.8962	-4643.01
75.1952	359.344	75.1952	239.712	75.1948	331.562	75.1956	-5043.48	75.1956	-6535.32	75.1948	-2422.04	75.1963	-4164.62	75.1963	-4454.33
75.4952	485.881	75.4952	397.905	75.4947	538.32	75.4955	-4614.54	75.4955	-6055.89	75.4947	-2099.06	75.4961	-3913.92	75.4961	-4074.51
75.7952	633.034	75.7952	604.061	75.7946	792.754	75.7954	-4100.18	75.7954	-5525.12	75.7946	-1729.69	75.796	-3331.89	75.796	-3470.36
76.0952	805.217	76.0952	819.458	76.0946	1098.24	76.0954	-3284.78	76.0954	-4881.3	76.0946	-1285.85	76.0959	-2679.93	76.0959	-2661.97
76.3951	987.089	76.3951	1047.33	76.3945	1397.28	76.3953	-2295.18	76.3953	-4004.16	76.3945	-749.185	76.3959	-1917.16	76.3959	-1782.99
76.6951	1169.74	76.6951	1256.38	76.6946	1725.1	76.6954	-1431.53	76.6954	-2977.02	76.6946	-153.8	76.6959	-1066.94	76.6959	-837.865
76.9953	1360.29	76.9953	1513.49	76.9949	2045.04	76.9957	-279.296	76.9957	-1910.49	76.9949	453.57	76.996	-28.4551	76.996	162.896
77.2953	1536.14	77.2953	1767.5	77.295	2335.32	77.2959	742.571	77.2959	-871.579	77.295	1077.15	77.2961	969.776	77.2961	1079.64
77.5952	1701.35	77.5952	1999.4	77.5949	2645.78	77.596	1800.83	77.596	123.178	77.5949	1682.08	77.596	1982.78	77.596	2041.5
77.895	1846.77	77.895	2264.6	77.8947	2962.06	77.896	2836.37	77.896	1284.33	77.8947	2309.45	77.8959	2756.72	77.8959	3069.19
78.1951	1997.84	78.1951	2482.56	78.1948	3273.71	78.1962	3757.3	78.1962	2326.13	78.1948	2901.18	78.196	3502.84	78.196	4074.53
78.4951	2132.71	78.4951	2682.15	78.495	3539.46	78.4964	4514.38	78.4964	3274.11	78.495	3361.23	78.4962	4193.6	78.4962	4890.94
78.7952	2263.48	78.7952	2847.05	78.7951	3763.05	78.7966	5173.02	78.7966	4135.89	78.7951	3741.11	78.7964	4547.84	78.7964	5601.66
79.0952	2361.12	79.0952	2983.69	79.0951	3931.14	79.0965	5574.66	79.0965	4789.9	79.0951	3944.46	79.0964	4761.63	79.0964	6009.49
79.3952	2410.45	79.3952	3076.17	79.3951	4033.86	79.3964	5764.6	79.3964	5175.9	79.3951	4003.27	79.3964	4780.69	79.3964	6129.67
79.6952	2422.83	79.6952	3114.2	79.6951	4046.01	79.6963	5734.92	79.6963	5221.51	79.6951	3877.43	79.6965	4585.29	79.6965	6056.02
79.9951	2387.26	79.9951	3067.1	79.9949	4000.7	79.996	5357.25	79.996	5028.37	79.9949	3647.87	79.9963	3999.14	79.9963	5684.99
80.2948	2313.85	80.2948	2977.29	80.2946	3895.71	80.2954	4803.5	80.2954	4642.23	80.2946	3280.82	80.296	3468.78	80.296	5287.22
80.5945	2189.18	80.5945	2809.27	80.5943	3687.55	80.5949	3956.51	80.5949	4128.95	80.5943	2768.42	80.5957	2792	80.5957	4573.26
80.8943	2024.65	80.8943	2549.28	80.8941	3364.95	80.8944	2725.66	80.8944	3173.5	80.8941	2073.27	80.8954	1810.37	80.8954	3533.51
81.1939	1787.56	81.1939	2232.96	81.1938	2950.27	81.1939	1403.24	81.1939	2010.76	81.1938	1292.53	81.195	752.117	81.195	2309.43
81.4936	1511.06	81.4936	1881.65	81.4936	2466.28	81.4935	194.71	81.4935	712.101	81.4936	473.898	81.4946	-119.523	81.4946	1077.29
81.7934	1174.85	81.7934	1462.08	81.7935	1915.93	81.7933	-1025.04	81.7933	-673.221	81.7935	-382.512	81.7944	-1190.12	81.7944	-342.865
82.0934	827.145	82.0934	1021.65	82.0937	1356.46	82.0934	-2427.49	82.0934	-1963.8	82.0937	-1124.29	82.0944	-2259.76	82.0944	-1658.34
82.3936	496.248	82.3936	583.363	82.3941	842.707	82.3938	-3777.1	82.3938	-3266.9	82.3941	-1837.24	82.3946	-3180.6	82.3946	-2796.09
82.6938	173.059	82.6938	222.157	82.6944	354.584	82.6942	-4814.04	82.6942	-4371.8	82.6944	-2427	82.6948	-3947.03	82.6948	-3863.1
82.9941	-131.822	82.9941	-123.851	82.995	-104.193	82.9949	-5828.97	82.9949	-5413.99	82.995	-2994.93	82.9952	-4546.41	82.9952	-4680.78
83.2945	-416.753	83.2945	-464.028	83.2957	-539.705	83.2957	-6596.23	83.2957	-6315.52	83.2957	-3448.96	83.2958	-5104.87	83.2958	-5487.69
83.595	-657.814	83.595	-721.023	83.5965	-923.083	83.5966	-7251.21	83.5966	-7056.63	83.5965	-3784.15	83.5965	-5682.75	83.5965	-6076.39
83.8955	-875.739	83.8955	-922.808	83.8971	-1239.04	83.8972	-7502.61	83.8972	-7564.46	83.8971	-3998.51	83.897	-5717.69	83.897	-6477.35
84.1959	-1035.86	84.1959	-1070.67	84.1976	-1486.96	84.1977	-7728.18	84.1977	-7839.64	84.1976	-4143.76	84.1974	-5963.63	84.1974	-6750.6
84.4961	-1163.32	84.4961	-1237.61	84.4979	-1652.59	84.498	-7967.96	84.498	-7990.53	84.4979	-4207.71	84.4977	-6295.78	84.4977	-6953.99
84.7962	-1250.67	84.7962	-1311.53	84.7982	-1759.98	84.7981	-8060.79	84.7981	-8024.01	84.7982	-4179.61	84.7979	-6207.67	84.7979	-6949.19
85.0962	-1314.92	85.0962	-1354.54	85.0983	-1848.06	85.0981	-7940.03	85.0981	-8116.8	85.0983	-4185.43	85.098	-6003.34	85.098	-6869.7
85.3961	-1367.37	85.3961	-1383.26	85.3983	-1940.71	85.3978	-7728.26	85.3978	-8052.81	85.3983	-4147.57	85.3979	-5824.37	85.3979	-6858.28
85.696	-1412.43	85.696	-1454.09	85.6982	-1998.15	85.6974	-7752.14	85.6974	-7998.83	85.6982	-4120.9	85.6977	-5641.73	85.6977	-6775.72
85.9958	-1439.36	85.9958	-1483.06	85.9981	-2059.72	85.997	-7606.96	85.997	-7851.72	85.9981	-4048.57	85.9974	-5478.15	85.9974	-6764.54
86.2956	-1450.29	86.2956	-1515.23	86.2978	-2080.61	86.2966	-7537.5	86.2966	-7726.12	86.2978	-3979.29	86.297	-5488.91	86.297	-6716.76
86.5954	-1467.08	86.5954	-1560.92	86.5975	-2069.96	86.5962	-7320.52	86.5962	-7630.3	86.5975	-3920.41	86.5967	-5280.2	86.5967	-6683.96
86.8953	-1469.36	86.8953	-1579.53	86.8974	-2046.2	86.8961	-7308.8	86.8961	-7544.02	86.8974	-3905.12	86.8965	-5447.84	86.8965	-6621.43
87.1955	-1471.12	87.1955	-1605.29	87.1976	-2015.78	87.1962	-7173.23	87.1962	-7481.35	87.1976	-3869.35	87.1967	-5220.86	87.1967	-6525.35
87.4958	-1480.7	87.4958	-1583.07	87.4979	-2009.23	87.4965	-7084.78	87.4965	-7454.82	87.4979	-3814.49	87.497	-5041.2	87.497	-6460.88
87.796	-1469.13	87.796	-1587.45	87.798	-1994.27	87.7967	-7069.13	87.7967	-7444.18	87.798	-3820.75	87.7971	-4981.1	87.7971	-6428.47
88.0961	-1467.78	88.0961	-1581.89	88.0981	-1954.76	88.0968	-7040.2	88.0968	-7404.68	88.0981	-3796.43	88.0971	-5015.82	88.0971	-6416.61
88.396	-1461.39	88.396	-1560.86	88.3979	-1906.54	88.3967	-7077.05	88.3967	-7379.26	88.3979	-3770.45	88.397	-5233.4	88.397	-6386.94
88.6959	-1440.86	88.6959	-1526.19	88.6978	-1862.83	88.6967	-6944.61	88.6967	-7370.29	88.6978	-3751.78	88.697	-5347.66	88.697	-6380.57
88.9959	-1433.28	88.9959	-1503.58	88.9977	-1831.22	88.9966	-6930.01	88.9966	-7352.51	88.9977	-3750.85	88.9971	-5316.11	88.9971	-6341.99
89.2956	-1439.11	89.2956	-1464.05	89.2974	-1804.93	89.2963	-6890.68	89.2963	-7363.1	89.2974	-3773.14	89.297	-5286.68	89.297	-6323.32
89.595	-1426.54	89.595	-1441.97	89.5969	-1796.9	89.5958	-6960.29	89.5958	-7342.57	89.5969	-3785.06	89.5967	-5298.83	89.5967	-6287.23
89.8943	-1422.64	89.8943	-1451.25	89.8963	-1787.01	89.8951	-6970.01	89.8951	-7297.93	89.8963	-3750.77	89.8962	-5103.74	89.8962	-6258.58
90.1935	-1425.23	90.1935	-1432.45	90.1955	-1790.44	90.1943	-6979.13	90.1943	-7320.61	90.1955	-3741.68	90.1956	-5152.54	90.1956	-6263.14
90.4927	-1404.81	90.4927	-1403.93	90.4947	-1747.38	90.4934	-6924.67	90.4934	-7289.31	90.4947	-3787.5	90.4949	-5222.84	90.4949	-6227.71
90.7919	-1414.06	90.7919	-1365.2	90.794	-1677.62	90.7926	-6997.04	90.7926	-7289.31	90.794	-3779.99	90.7942	-5351.98	90.7942	-6216.51
91.0911	-1404.79	91.0911	-1342.76	91.0932	-1639.98	91.0918	-7092.25	91.0918	-7230.12	91.0932	-3773.83	91.0936	-5266.76	91.0936	-6231.24
91.3905	-1400.19	91.3905	-1339.98	91.3927	-1602.55	91.3913	-6933.26	91.3913	-7167.19	91.3927	-3777.6	91.3931	-4956.05	91.3931	-6161.23
91.6901	-1402.57	91.6901	-1347	91.6922	-1569.02	91.691	-6957.58	91.691	-7092.39	91.6922	-3783.01	91.6928	-4862.76	91.6928	-6126.76
91.9897	-1387.47	91.9897	-1379.19	91.9918	-1520.23	91.9905	-6898.02	91.9905	-7098.83	91.9918	-3777.23	91.9922	-4913.22	91.9922	-6125.69
92.2896	-1365.82	92.2896	-1402.97	92.2916	-1470.55	92.2902	-6849.52	92.2902	-7040.79	92.2916	-3762.6	92.2918	-4852.95	92.2918	-6093.99
92.5898	-1361.03	92.5898	-1418.5	92.5917	-1440.33	92.5901	-6717.23	92.5901	-7037.94	92.5917	-3751.3	92.5916	-4889.19	92.5916	-6100.13
92.8901	-1344.96	92.8901	-1433.3	92.8918	-1391.56	92.89	-6618.23	92.89	-7069.62	92.8918	-3760.41	92.8914	-5119.14	92.8914	-6105.95
93.1903	-1328.16	93.1903	-1467.07	93.1919	-1311.51	93.1899	-6596.71	93.1899	-7014.86	93.1919	-3783.74	93.1912	-5175.27	93.1912	-6099.09
93.4905	-1318.69	93.4905	-1534.11	93.492	-1312.22	93.4898	-6600.28	93.4898	-6994.79	93.492	-3763.72	93.4909	-5000.96	93.4909	-6144.16
93.7909	-1289.37	93.7909	-1597.75	93.7924	-1342.02	93.7899	-6389.36	93.7899	-6888.07	93.7924	-3770.42	93.7908	-4888.31	93.7908	-6154.14
94.0917	-1268.67	94.0917	-1666.29	94.093	-1367.4	94.0902	-6078.28	94.0902	-6837.96	94.093	-3806.83	94.091	-5056.52	94.091	-6177.62
94.3924	-1245.88	94.3924	-1737.19	94.3936	-1393.13	94.3904	-6169.53	94.3904	-6855.38	94.3936	-3840.5	94.3912	-5234.43	94.3912	-6239.83
94.6929	-1221.71	94.6929	-1785.76	94.6939	-1448.36	94.6904	-6088.33	94.6904	-6885.1	94.6939	-3873.24	94.6911	-5306.25	94.6911	-6284.24
94.9933	-1210.91	94.9933	-1785.12	94.9943	-1480.65	94.9906	-5988.38	94.9906	-6785.88	94.9943	-3885.91	94.9913	-5321.13	94.9913	-6299.44
95.2936	-1195.55	95.2936	-1819.92	95.2947	-1563.88	95.2912	-5981.17	95.2912	-6756.58	95.2947	-3927.49	95.2917	-5268.55	95.2917	-6348.35
95.5939	-1181.28	95.5939	-1826.68	95.5951	-1610.65	95.5916	-6099.39	95.5916	-6749.62	95.5951	-3994.21	95.592	-5370.4	95.592	-6370.92
95.8942	-1165.25	95.8942	-1804.99	95.8954	-1676.85	95.892	-6103.98	95.892	-6673.06	95.8954	-4020.76	95.8924	-5219.82	95.8924	-6406.69
96.1941	-1142.78	96.1941	-1806.08	96.1953	-1814.48	96.1921	-6128.3	96.1921	-6668.28	96.1953	-4044.18	96.1924	-5211.04	96.1924	-6407.04
