# Supplementary material for: Development and biophysical characterization of a humanized FSH–blocking monoclonal antibody therapeutic formulated at an ultra-high concentration
Source: eLife. 2023 Jun 19;12:e88898. doi: 10.7554/eLife.88898 (PMC10325703; doi:10.7554/eLife.88898)
Supplement: Figure 3—source data 1. [file elife-88898-fig3-data1.xlsx]

## Sheet: Figure 3A
Figure 3A: Effect of MS-Hu6 concentration on formulation viscosity
	Formulation (mg/mL)	Viscosity (cP)
	0	4.5
	1	11.3
	10	12
	20	15
	50	18.8
	100	27.5

## Sheet: Figure 3B
Figure 3B: Effect of MS-Hu6 concentration on formulation turbidity at 350 nm
MS-Hu6 (mg/mL)	Absorbance at 350 nm
	PBS		Formulation
	Replicate 1	Replicate 2	Replicate 1	Replicate 2
0	0.068	0.0015	0.072	0.0014
8.62	0.077	0.0014
0.2			0.069	0.0042
1			0.077	0.0092
10			0.081	0.0064
100			0.094	0.0042

## Sheet: Figure 3C
Figure 3C: Effect of MS-Hu6 concentration on clarity of formulation at different wavelengths (350,540 and 595 nm)
MS-Hu6 (mg/mL)	Transmittance (%) at 350 nm
	Formulated MS-Hu6				MS-Hu6 in PBS
	Replicate 1	Replicate 2	Replicate 3	Replicate 4	Replicate 1	Replicate 2
0.2	100.21	100.53
1	99.13	99.15
10	99.4	99.13
50	96.98
100	95.54	97.01	93.54	96.38
8.621					99.2	99.77
MS-Hu6 (mg/mL)	Transmittance (%) at 540 nm
	Formulated MS-Hu6				MS-Hu6 in PBS
	Replicate 1	Replicate 2	Replicate 3	Replicate 4	Replicate 1	Replicate 2
0.2	99.98	100.28
1	99.82	99.4
10	99.13	99.4
50	99.43
100	98.74	98.7	99.13	99.29
8.621					99.36	99.61
MS-Hu6 (mg/mL)	Transmittance (%) at 595 nm
	Formulated MS-Hu6				MS-Hu6 in PBS
	Replicate 1	Replicate 2	Replicate 3	Replicate 4	Replicate 1	Replicate 2
0.2	100.03	100.35
1	99.86	99.84
10	99.57	99.7
50	99.75
100	99.18	99.34	99.25	99.38
8.621					99.7	99.34
