# Supplementary material for: Development and biophysical characterization of a humanized FSH–blocking monoclonal antibody therapeutic formulated at an ultra-high concentration
Source: eLife. 2023 Jun 19;12:e88898. doi: 10.7554/eLife.88898 (PMC10325703; doi:10.7554/eLife.88898)
Supplement: Figure 4—source data 1. [file elife-88898-fig4-data1.xlsx]

## Sheet: Figure 4A
Figure 4A: Secondary Structure determination of MS-Hu6 by circular dichroism
Wavelength (nm)	Ellipticity (mdeg)			Wavelength (nm)	Molar Residue Ellipticity (deg cm²/dmol)
	0.5 mg/mL (in PBS)	0.5 mg/mL (Formulated)			0.5 mg/mL (in PBS)	0.5 mg/mL (Formulated)
190	6.36	6.41		190	-297.74	-297.74
191	7.54	7.59		191	-95.21	-95.21
192	9.95	9.99		192	-118.5	-118.5
193	12.92	12.96		193	-277.03	-277.03
194	15.48	15.52		194	-490.74	-490.74
195	17.93	17.96		195	-642.78	-642.78
196	18.98	19		196	-583.42	-583.42
197	18.93	18.94		197	-236.4	-236.4
198	17.41	17.42		198	356.84	356.84
199	14.58	14.59		199	1045.14	1045.14
200	10.45	10.46		200	1631.19	1631.19
201	6.33	6.34		201	2008.15	2008.15
202	2.51	2.52		202	2154.91	2154.91
203	-0.38	-0.37		203	2054.65	2054.65
204	-2.73	-2.73		204	1709.02	1709.02
205	-4.72	-4.72		205	1193.22	1193.22
206	-6.42	-6.42		206	579.46	579.46
207	-7.53	-7.53		207	-18.27	-18.27
208	-8.02	-8.02		208	-535.93	-535.93
209	-7.81	-7.81		209	-969.94	-969.94
210	-7.33	-7.33		210	-1329.42	-1329.42
211	-6.58	-6.58		211	-1591.61	-1591.61
212	-5.79	-5.79		212	-1784.22	-1784.22
213	-5	-5		213	-1897.01	-1897.01
214	-4.1	-4.11		214	-1957.69	-1957.69
215	-3.28	-3.28		215	-1967.59	-1967.59
216	-2.66	-2.66		216	-1912.18	-1912.18
217	-2.2	-2.21		217	-1796.75	-1796.75
218	-2	-2		218	-1671.43	-1671.43
219	-2.02	-2.02		219	-1506.86	-1506.86
220	-2.24	-2.24		220	-1305.02	-1305.02
221	-2.58	-2.59		221	-1091.64	-1091.64
222	-2.94	-2.95		222	-875.29	-875.29
223	-3.36	-3.37		223	-630.91	-630.91
224	-3.76	-3.76		224	-357.83	-357.83
225	-3.99	-3.99		225	-31.95	-31.95
226	-3.95	-3.95		226	305.82	305.82
227	-3.76	-3.76		227	573.52	573.52
228	-3.41	-3.41		228	691.26	691.26
229	-3.12	-3.12		229	672.46	672.46
230	-2.88	-2.88		230	543.84	543.84
231	-2.65	-2.65		231	346.29	346.29
232	-2.47	-2.47		232	100.06	100.06
233	-2.36	-2.36		233	-175.75	-175.75
234	-2.17	-2.17		234	-476.89	-476.89
235	-1.92	-1.92		235	-762.5	-762.5
236	-1.64	-1.64		236	-990.06	-990.06
237	-1.38	-1.38		237	-1114.39	-1114.39
238	-1.21	-1.22		238	-1155.62	-1155.62
239	-1.05	-1.05		239	-1128.91	-1128.91
240	-0.84	-0.84		240	-1045.8	-1045.8

## Sheet: Figure 4B
Figure 4B: Secondary Structure determination of MS-Hu6 by Fourier-transform infrared spectroscopy
Wavenumber (cm-1)	Absorbance				Wavenumber (cm-1)	Second Derivative Absorbance
	Formulation (100 mg/mL)	Formulation ( 50 mg/mL)	MS-Hu6 (8.62 mg/mL in PBS)			Formulation (100 mg/mL)	Formulation (50 mg/mL)
650.403	3.26455e-07	-5.46658e-07	3.94217e-07		649.921	2.35006e-05	-7.13778e-05
650.885	3.26455e-07	-5.46658e-07	3.94217e-07		650.403	2.35006e-05	-5.62329e-05
651.367	3.26455e-07	-5.46658e-07	3.94217e-07		650.885	2.35006e-05	-4.28097e-05
651.849	3.26455e-07	-5.46658e-07	3.94217e-07		651.367	2.35006e-05	-3.11092e-05
652.331	3.26455e-07	-5.46658e-07	3.94217e-07		651.849	2.31287e-05	-2.08539e-05
652.814	3.26455e-07	-5.46658e-07	3.94217e-07		652.331	2.2595e-05	-1.16729e-05
653.296	3.26455e-07	-5.46658e-07	3.94217e-07		652.814	2.18425e-05	-3.29771e-06
653.778	3.26455e-07	-5.46658e-07	3.94217e-07		653.296	2.08263e-05	4.30551e-06
654.26	3.26455e-07	-5.46658e-07	3.94217e-07		653.778	1.95283e-05	1.09462e-05
654.742	3.26455e-07	-5.46658e-07	3.94217e-07		654.26	1.79673e-05	1.63612e-05
655.224	3.26455e-07	-5.46658e-07	3.94217e-07		654.742	1.62051e-05	2.04262e-05
655.706	3.26455e-07	-5.46658e-07	3.94217e-07		655.224	1.43418e-05	2.32992e-05
656.188	3.26455e-07	-5.46658e-07	3.94217e-07		655.706	1.25016e-05	2.54042e-05
656.671	3.26455e-07	-5.46658e-07	3.94217e-07		656.188	1.08063e-05	2.72492e-05
657.153	3.26455e-07	-5.46658e-07	3.94217e-07		656.671	9.34505e-06	2.91848e-05
657.635	3.26455e-07	-5.46658e-07	3.94217e-07		657.153	8.15584e-06	3.12389e-05
658.117	3.26455e-07	-5.46658e-07	3.94217e-07		657.635	7.2283e-06	3.31323e-05
658.599	3.26455e-07	-5.46658e-07	3.94217e-07		658.117	6.52485e-06	3.44607e-05
659.081	3.26455e-07	-5.46658e-07	3.94217e-07		658.599	6.00689e-06	3.49459e-05
659.563	3.26455e-07	-5.46658e-07	3.94217e-07		659.081	5.64587e-06	3.46082e-05
660.046	3.26455e-07	-5.46658e-07	3.94217e-07		659.563	5.41584e-06	3.37649e-05
660.528	3.26455e-07	-5.46658e-07	3.94217e-07		660.046	5.27431e-06	3.28544e-05
661.01	3.26455e-07	-5.46658e-07	3.94217e-07		660.528	5.14602e-06	3.21919e-05
661.492	3.26455e-07	-5.46658e-07	3.94217e-07		661.01	4.92674e-06	3.17908e-05
661.974	3.26455e-07	-5.46658e-07	3.94217e-07		661.492	4.51019e-06	3.13611e-05
662.456	3.26455e-07	-5.46658e-07	3.94217e-07		661.974	3.82811e-06	3.04794e-05
662.938	3.26455e-07	-5.46658e-07	3.94217e-07		662.456	2.88961e-06	2.88364e-05
663.421	3.26455e-07	-5.46658e-07	3.94217e-07		662.938	1.79348e-06	2.64234e-05
663.903	3.26455e-07	-5.46658e-07	3.94217e-07		663.421	7.03997e-07	2.35577e-05
664.385	3.26455e-07	-5.46658e-07	3.94217e-07		663.903	-2.05553e-07	2.07319e-05
664.867	3.26455e-07	-5.46658e-07	3.94217e-07		664.385	-8.18329e-07	1.8377e-05
665.349	3.26455e-07	-5.46658e-07	3.94217e-07		664.867	-1.11726e-06	1.66649e-05
665.831	3.26455e-07	-5.46658e-07	3.94217e-07		665.349	-1.18424e-06	1.54608e-05
666.313	3.26455e-07	-5.46658e-07	3.94217e-07		665.831	-1.159e-06	1.44371e-05
666.796	3.26455e-07	-5.46658e-07	3.94217e-07		666.313	-1.17568e-06	1.32767e-05
667.278	3.26455e-07	-5.46658e-07	3.94217e-07		666.796	-1.30888e-06	1.18459e-05
667.76	3.26455e-07	-5.46658e-07	3.94217e-07		667.278	-1.55146e-06	1.02464e-05
668.242	3.26455e-07	-5.46658e-07	3.94217e-07		667.76	-1.8339e-06	8.72489e-06
668.724	3.26455e-07	-5.46658e-07	3.94217e-07		668.242	-2.07126e-06	7.50554e-06
669.206	3.75677e-07	-3.29896e-07	4.88929e-07		668.724	-2.21231e-06	6.64774e-06
669.688	4.22581e-07	-1.33405e-07	5.70162e-07		669.206	-3.09777e-06	6.01629e-06
670.17	4.6731e-07	4.32287e-08	6.38876e-07		669.688	-3.31328e-06	5.37253e-06
670.653	5.10011e-07	2.00462e-07	6.95828e-07		670.17	-2.51201e-06	4.52853e-06
671.135	5.50833e-07	3.38857e-07	7.41586e-07		670.653	-1.05576e-06	3.23949e-06
671.617	5.8993e-07	4.59147e-07	7.76611e-07		671.135	3.14588e-07	1.60979e-06
672.099	6.27459e-07	5.62264e-07	8.01333e-07		671.617	7.68331e-07	-1.29304e-07
672.581	6.63576e-07	6.49327e-07	8.16197e-07		672.099	-3.77848e-07	-1.81318e-06
673.063	6.98438e-07	7.21601e-07	8.2168e-07		672.581	-1.47582e-06	-2.55611e-06
673.545	7.32203e-07	7.80434e-07	8.18283e-07		673.063	-2.4369e-06	-2.14526e-06
674.028	7.65029e-07	8.2719e-07	8.06522e-07		673.545	-3.21493e-06	-1.035e-06
674.51	7.97068e-07	8.63187e-07	7.86922e-07		674.028	-3.79895e-06	-2.21056e-08
674.992	8.28473e-07	8.89656e-07	7.6002e-07		674.51	-4.1806e-06	2.56862e-07
675.474	8.59389e-07	9.07707e-07	7.26388e-07		674.992	-4.32738e-06	-2.94032e-07
675.956	8.89957e-07	9.18324e-07	6.8666e-07		675.474	-4.18856e-06	-1.19977e-06
676.438	9.20309e-07	9.22371e-07	6.41555e-07		675.956	-3.73422e-06	-1.73407e-06
676.92	9.50572e-07	9.20608e-07	5.91887e-07		676.438	-3.00652e-06	-1.38949e-06
677.403	9.8086e-07	9.13703e-07	5.38552e-07		676.92	-2.1393e-06	-2.02172e-07
677.885	1.01128e-06	9.02249e-07	4.82498e-07		677.403	-1.32012e-06	1.25855e-06
678.367	1.04192e-06	8.86784e-07	4.24687e-07		677.885	-7.09263e-07	2.22879e-06
678.849	1.07287e-06	8.67816e-07	3.66047e-07		678.367	-3.59373e-07	2.20618e-06
679.331	1.10418e-06	8.45867e-07	3.07442e-07		678.849	-1.86347e-07	1.25372e-06
679.813	1.13592e-06	8.21497e-07	2.49654e-07		679.331	-1.07337e-08	-3.19841e-08
680.295	1.16813e-06	7.95327e-07	1.93385e-07		679.813	3.43972e-07	-8.64622e-07
680.777	1.20083e-06	7.68029e-07	1.39253e-07		680.295	9.48921e-07	-7.27792e-07
681.26	1.23403e-06	7.40296e-07	8.78074e-08		680.777	1.71644e-06	3.26709e-07
681.742	1.26773e-06	7.12808e-07	3.95139e-08		681.26	2.4236e-06	1.70385e-06
682.224	1.30191e-06	6.86204e-07	-5.24612e-09		681.742	2.80453e-06	2.60718e-06
682.706	1.33654e-06	6.61062e-07	-4.61848e-08		682.224	2.67315e-06	2.49072e-06
683.188	1.37157e-06	6.37904e-07	-8.3105e-08		682.706	2.00949e-06	1.36161e-06
683.67	1.40694e-06	6.17202e-07	-1.15891e-07		683.188	9.73563e-07	-2.44074e-07
684.152	1.44258e-06	5.99379e-07	-1.44485e-07		683.67	-1.62791e-07	-1.57708e-06
684.635	1.47838e-06	5.84785e-07	-1.68875e-07		684.152	-1.13135e-06	-2.09793e-06
685.117	1.51425e-06	5.73654e-07	-1.89067e-07		684.635	-1.76709e-06	-1.74911e-06
685.599	1.55008e-06	5.66059e-07	-2.05088e-07		685.117	-2.04345e-06	-9.53837e-07
686.081	1.58573e-06	5.61874e-07	-2.1698e-07		685.599	-2.03834e-06	-3.70727e-07
686.563	1.62106e-06	5.60774e-07	-2.24813e-07		686.081	-1.85947e-06	-5.60051e-07
687.045	1.65594e-06	5.62285e-07	-2.28687e-07		686.563	-1.57365e-06	-1.69087e-06
687.527	1.6902e-06	5.65856e-07	-2.28746e-07		687.045	-1.17569e-06	-3.38672e-06
688.01	1.72369e-06	5.70956e-07	-2.25176e-07		687.527	-6.1731e-07	-4.80529e-06
688.492	1.75622e-06	5.77148e-07	-2.18211e-07		688.01	1.11379e-07	-5.07163e-06
688.974	1.78764e-06	5.84125e-07	-2.08128e-07		688.492	9.11927e-07	-3.8755e-06
689.456	1.81775e-06	5.91719e-07	-1.95249e-07		688.974	1.58654e-06	-1.7605e-06
689.938	1.84642e-06	5.98978e-07	-1.79065e-07		689.456	1.93487e-06	2.00781e-07
690.42	1.87346e-06	6.0651e-07	-1.59772e-07		689.938	1.86449e-06	1.111e-06
690.902	1.89868e-06	6.14904e-07	-1.37736e-07		690.42	1.42872e-06	7.97586e-07
691.384	1.92189e-06	6.24681e-07	-1.13469e-07		690.902	7.75506e-07	-2.20988e-07
691.867	1.94291e-06	6.36238e-07	-8.76001e-08		691.384	6.08193e-08	-1.21925e-06
692.349	1.96157e-06	6.4982e-07	-6.08538e-08		691.867	-6.06307e-07	-1.74541e-06
692.831	1.97769e-06	6.65489e-07	-3.4017e-08		692.349	-1.17043e-06	-1.80478e-06
693.313	1.99111e-06	6.83114e-07	-7.90994e-09		692.831	-1.61307e-06	-1.76455e-06
693.795	2.00167e-06	7.02366e-07	1.66584e-08		693.313	-1.9343e-06	-2.08255e-06
694.277	2.00923e-06	7.22741e-07	3.89355e-08		693.795	-2.13662e-06	-3.01372e-06
694.759	2.01365e-06	7.43606e-07	5.82776e-08		694.277	-2.21965e-06	-4.42767e-06
695.242	2.01479e-06	7.64268e-07	7.41888e-08		694.759	-2.1814e-06	-5.84746e-06
695.724	2.01256e-06	7.84069e-07	8.63488e-08		695.242	-2.02559e-06	-6.69069e-06
696.206	2.00685e-06	8.02458e-07	9.46137e-08		695.724	-1.77098e-06	-6.59047e-06
696.688	1.99757e-06	8.19038e-07	9.90008e-08		696.206	-1.45909e-06	-5.60847e-06
697.17	1.98465e-06	8.33561e-07	9.96567e-08		696.688	-1.15109e-06	-4.21913e-06
697.652	1.96803e-06	8.45873e-07	9.68294e-08		697.17	-9.09576e-07	-3.05975e-06
698.134	1.94768e-06	8.55861e-07	9.08438e-08		697.652	-7.74333e-07	-2.59381e-06
698.617	1.92357e-06	8.63401e-07	8.20956e-08		698.134	-7.47303e-07	-2.86879e-06
699.099	1.89569e-06	8.68353e-07	7.1045e-08		698.617	-8.01222e-07	-3.51814e-06
699.581	1.86404e-06	8.70591e-07	5.82132e-08		699.099	-9.09266e-07	-3.99153e-06
700.063	1.82866e-06	8.70054e-07	4.41633e-08		699.581	-1.07404e-06	-3.88916e-06
700.545	1.78958e-06	8.6678e-07	2.94729e-08		700.063	-1.33137e-06	-3.19526e-06
701.027	1.74686e-06	8.60904e-07	1.46948e-08		700.545	-1.72497e-06	-2.2851e-06
701.509	1.70059e-06	8.52617e-07	3.24422e-10		701.027	-2.26038e-06	-1.69687e-06
701.992	1.65084e-06	8.4209e-07	-1.32248e-08		701.509	-2.86536e-06	-1.81294e-06
702.474	1.59775e-06	8.29401e-07	-2.56227e-08		701.992	-3.38462e-06	-2.62471e-06
702.956	1.54142e-06	8.14491e-07	-3.66143e-08		702.474	-3.61834e-06	-3.72787e-06
703.438	1.48201e-06	7.97162e-07	-4.60009e-08		702.956	-3.39126e-06	-4.53485e-06
703.92	1.41968e-06	7.7713e-07	-5.36316e-08		703.438	-2.63171e-06	-4.58957e-06
704.402	1.35459e-06	7.54083e-07	-5.94066e-08		703.92	-1.41786e-06	-3.80266e-06
704.884	1.28693e-06	7.27752e-07	-6.33022e-08		704.402	2.87562e-08	-2.48576e-06
705.366	1.21692e-06	6.97943e-07	-6.53992e-08		704.884	1.40653e-06	-1.16776e-06
705.849	1.14475e-06	6.64549e-07	-6.5914e-08		705.366	2.4294e-06	-3.07658e-07
706.331	1.07067e-06	6.27542e-07	-6.52102e-08		705.849	2.91679e-06	-6.22239e-08
706.813	9.9491e-07	5.86965e-07	-6.37899e-08		706.331	2.83673e-06	-2.41548e-07
707.295	9.1771e-07	5.42929e-07	-6.22412e-08		706.813	2.29371e-06	-4.60877e-07
707.777	8.39331e-07	4.95638e-07	-6.11467e-08		707.295	1.46798e-06	-3.9104e-07
708.259	7.60037e-07	4.45407e-07	-6.09633e-08		707.777	5.43821e-07	4.74113e-08
708.741	6.801e-07	3.9265e-07	-6.19531e-08		708.259	-3.44769e-07	6.50601e-07
709.224	5.99799e-07	3.37844e-07	-6.41995e-08		708.741	-1.12576e-06	1.07387e-06
709.706	5.19417e-07	2.8148e-07	-6.76873e-08		709.224	-1.76788e-06	1.05482e-06
710.188	4.39239e-07	2.24026e-07	-7.23731e-08		709.706	-2.24534e-06	5.82571e-07
710.67	3.59556e-07	1.6593e-07	-7.82232e-08		710.188	-2.5188e-06	-9.45867e-08
711.152	2.80659e-07	1.07606e-07	-8.5202e-08		710.67	-2.54218e-06	-6.16098e-07
711.634	2.02837e-07	4.94305e-08	-9.3239e-08		711.152	-2.29179e-06	-7.25927e-07
712.116	1.26376e-07	-8.27199e-09	-1.02183e-07		711.634	-1.79554e-06	-4.18853e-07
712.599	5.15575e-08	-6.52458e-08	-1.11775e-07		712.116	-1.14441e-06	6.51425e-08
713.081	-2.13435e-08	-1.2131e-07	-1.21653e-07		712.599	-4.74639e-07	3.95225e-07
713.563	-9.2061e-08	-1.76347e-07	-1.3138e-07		713.081	7.31822e-08	3.51584e-07
714.045	-1.60339e-07	-2.30269e-07	-1.40498e-07		713.563	4.01098e-07	-3.93165e-08
714.527	-2.25933e-07	-2.82983e-07	-1.48594e-07		714.045	4.83375e-07	-5.24974e-07
715.009	-2.88613e-07	-3.3434e-07	-1.55336e-07		714.527	3.68278e-07	-7.81492e-07
715.491	-3.48159e-07	-3.84113e-07	-1.60508e-07		715.009	1.52352e-07	-6.14802e-07
715.973	-4.04369e-07	-4.31986e-07	-1.63999e-07		715.491	-6.00546e-08	-7.89749e-08
716.456	-4.57055e-07	-4.77568e-07	-1.65796e-07		715.973	-1.93332e-07	5.54661e-07
716.938	-5.06047e-07	-5.2043e-07	-1.65945e-07		716.456	-2.15775e-07	9.66971e-07
717.42	-5.51191e-07	-5.60156e-07	-1.64534e-07		716.938	-1.34196e-07	9.93182e-07
717.902	-5.92353e-07	-5.96384e-07	-1.6166e-07		717.42	3.08467e-08	7.40319e-07
718.384	-6.29415e-07	-6.28841e-07	-1.5742e-07		717.902	2.65605e-07	5.36351e-07
718.866	-6.6228e-07	-6.57349e-07	-1.51892e-07		718.384	5.71375e-07	7.42961e-07
719.348	-6.90872e-07	-6.8183e-07	-1.45135e-07		718.866	9.53891e-07	1.5296e-06
719.831	-7.15129e-07	-7.02303e-07	-1.37175e-07		719.348	1.4071e-06	2.74906e-06
720.313	-7.35014e-07	-7.18892e-07	-1.28008e-07		719.831	1.89957e-06	3.98323e-06
720.795	-7.50505e-07	-7.31832e-07	-1.1761e-07		720.313	2.37571e-06	4.74639e-06
721.277	-7.61604e-07	-7.41464e-07	-1.05951e-07		720.795	2.76926e-06	4.72899e-06
721.759	-7.6833e-07	-7.4822e-07	-9.30153e-08		721.277	3.02249e-06	3.95811e-06
722.241	-7.7072e-07	-7.5257e-07	-7.88192e-08		721.759	3.10157e-06	2.77738e-06
722.723	-7.68833e-07	-7.54965e-07	-6.34238e-08		722.241	3.00141e-06	1.67326e-06
723.206	-7.62741e-07	-7.55765e-07	-4.69374e-08		722.723	2.74508e-06	1.0336e-06
723.688	-7.52536e-07	-7.55185e-07	-2.9508e-08		723.206	2.37608e-06	9.76991e-07
724.17	-7.38324e-07	-7.53267e-07	-1.13159e-08		723.688	1.95138e-06	1.333e-06
724.652	-7.20225e-07	-7.4989e-07	7.43702e-09		724.17	1.53361e-06	1.7803e-06
725.134	-6.98374e-07	-7.44815e-07	2.65329e-08		724.652	1.18356e-06	2.04976e-06
725.616	-6.72919e-07	-7.37735e-07	4.57456e-08		725.134	9.50311e-07	2.07905e-06
726.098	-6.44021e-07	-7.2834e-07	6.48457e-08		725.616	8.63586e-07	2.02365e-06
726.58	-6.11852e-07	-7.16347e-07	8.36123e-08		726.098	9.21945e-07	2.13011e-06
727.063	-5.76596e-07	-7.01526e-07	1.01842e-07		726.58	1.08639e-06	2.54789e-06
727.545	-5.38444e-07	-6.83693e-07	1.19358e-07		727.063	1.28413e-06	3.20343e-06
728.027	-4.97599e-07	-6.62707e-07	1.36018e-07		727.545	1.42598e-06	3.8117e-06
728.509	-4.54272e-07	-6.38465e-07	1.51706e-07		728.027	1.43628e-06	4.0232e-06
728.991	-4.08682e-07	-6.10901e-07	1.66324e-07		728.509	1.28333e-06	3.61864e-06
729.473	-3.61053e-07	-5.80002e-07	1.79779e-07		728.991	9.96065e-07	2.6426e-06
729.955	-3.11618e-07	-5.45808e-07	1.91973e-07		729.473	6.56113e-07	1.38855e-06
730.438	-2.60611e-07	-5.08419e-07	2.02805e-07		729.955	3.65273e-07	2.5216e-07
730.92	-2.08274e-07	-4.67999e-07	2.12174e-07		730.438	2.02328e-07	-4.72768e-07
731.402	-1.54848e-07	-4.24769e-07	2.19997e-07		730.92	1.86883e-07	-7.34332e-07
731.884	-1.00579e-07	-3.79006e-07	2.26227e-07		731.402	2.69501e-07	-7.27594e-07
732.366	-4.57112e-08	-3.31033e-07	2.30858e-07		731.884	3.51981e-07	-7.58265e-07
732.848	9.51229e-09	-2.81211e-07	2.33931e-07		732.366	3.29082e-07	-1.05598e-06
733.33	6.48493e-08	-2.29923e-07	2.35528e-07		732.848	1.33145e-07	-1.63434e-06
733.813	1.20061e-07	-1.7756e-07	2.35763e-07		733.33	-2.38786e-07	-2.28895e-06
734.295	1.74912e-07	-1.24503e-07	2.34774e-07		733.813	-7.26046e-07	-2.72328e-06
734.777	2.29172e-07	-7.11137e-08	2.32718e-07		734.295	-1.2269e-06	-2.73413e-06
735.259	2.82618e-07	-1.77285e-08	2.29773e-07		734.777	-1.63362e-06	-2.34066e-06
735.741	3.35034e-07	3.53329e-08	2.26138e-07		735.259	-1.86272e-06	-1.78817e-06
736.223	3.86209e-07	8.77562e-08	2.22031e-07		735.741	-1.87276e-06	-1.41426e-06
736.705	4.35946e-07	1.39215e-07	2.17678e-07		736.223	-1.6696e-06	-1.46118e-06
737.188	4.84053e-07	1.89364e-07	2.13296e-07		736.705	-1.29672e-06	-1.93519e-06
737.67	5.30351e-07	2.37839e-07	2.09079e-07		737.188	-8.20145e-07	-2.59771e-06
738.152	5.74673e-07	2.84285e-07	2.05174e-07		737.67	-3.1408e-07	-3.08776e-06
738.634	6.16863e-07	3.28379e-07	2.01678e-07		738.152	1.48555e-07	-3.11373e-06
739.116	6.56781e-07	3.69875e-07	1.98633e-07		738.634	5.03057e-07	-2.60087e-06
739.598	6.943e-07	4.08619e-07	1.96031e-07		739.116	6.98408e-07	-1.72426e-06
740.08	7.29306e-07	4.44561e-07	1.93816e-07		739.598	7.106e-07	-8.09764e-07
740.562	7.61701e-07	4.7774e-07	1.91887e-07		740.08	5.55926e-07	-1.65508e-07
741.045	7.91405e-07	5.08259e-07	1.90105e-07		740.562	2.94781e-07	6.67217e-08
741.527	8.1835e-07	5.36252e-07	1.88291e-07		741.045	1.91577e-08	-4.58759e-08
742.009	8.42485e-07	5.61851e-07	1.86236e-07		741.527	-1.74577e-07	-2.99486e-07
742.491	8.63776e-07	5.85165e-07	1.83716e-07		742.009	-2.21476e-07	-4.96307e-07
742.973	8.82203e-07	6.06261e-07	1.80505e-07		742.491	-1.12718e-07	-5.63327e-07
743.455	8.97765e-07	6.2517e-07	1.764e-07		742.973	1.00874e-07	-5.80002e-07
743.937	9.10475e-07	6.41888e-07	1.71242e-07		743.455	3.2734e-07	-7.01636e-07
744.42	9.20363e-07	6.56391e-07	1.64919e-07		743.937	4.65511e-07	-1.0365e-06
744.902	9.27473e-07	6.68638e-07	1.57375e-07		744.42	4.38239e-07	-1.55428e-06
745.384	9.31866e-07	6.78586e-07	1.48604e-07		744.902	2.10752e-07	-2.08698e-06
745.866	9.33614e-07	6.86183e-07	1.38649e-07		745.384	-2.06353e-07	-2.41811e-06
746.348	9.32804e-07	6.91372e-07	1.276e-07		745.866	-7.68836e-07	-2.41031e-06
746.83	9.29539e-07	6.94092e-07	1.15598e-07		746.348	-1.41351e-06	-2.08827e-06
747.312	9.23928e-07	6.94278e-07	1.02831e-07		746.83	-2.07286e-06	-1.63163e-06
747.795	9.16096e-07	6.91872e-07	8.95301e-08		747.312	-2.67892e-06	-1.27469e-06
748.277	9.06176e-07	6.86825e-07	7.59503e-08		747.795	-3.16254e-06	-1.17687e-06
748.759	8.94307e-07	6.79117e-07	6.23505e-08		748.277	-3.45095e-06	-1.33502e-06
749.241	8.80638e-07	6.68773e-07	4.89668e-08		748.759	-3.47761e-06	-1.59619e-06
749.723	8.65321e-07	6.55876e-07	3.59941e-08		749.241	-3.20104e-06	-1.75552e-06
750.205	8.48515e-07	6.40585e-07	2.35759e-08		749.723	-2.63245e-06	-1.6879e-06
750.687	8.30378e-07	6.23137e-07	1.1814e-08		750.205	-1.85188e-06	-1.42616e-06
751.169	8.11072e-07	6.03842e-07	7.84462e-10		750.687	-1.00136e-06	-1.14682e-06
751.652	7.90761e-07	5.83072e-07	-9.4381e-09		751.169	-2.49986e-07	-1.06015e-06
752.134	7.69605e-07	5.61243e-07	-1.87661e-08		751.652	2.56619e-07	-1.27909e-06
752.616	7.47767e-07	5.38788e-07	-2.7097e-08		752.134	4.42623e-07	-1.7379e-06
753.098	7.25405e-07	5.16138e-07	-3.43272e-08		752.616	3.24162e-07	-2.21781e-06
753.58	7.02674e-07	4.93685e-07	-4.03743e-08		753.098	7.62223e-10	-2.46203e-06
754.062	6.79726e-07	4.71752e-07	-4.51991e-08		753.58	-3.83631e-07	-2.32126e-06
754.544	6.56709e-07	4.50555e-07	-4.88112e-08		754.062	-6.89669e-07	-1.83613e-06
755.027	6.33767e-07	4.30167e-07	-5.1255e-08		754.544	-8.2749e-07	-1.21693e-06
755.509	6.11037e-07	4.1051e-07	-5.25812e-08		755.027	-7.78005e-07	-7.22285e-07
755.991	5.8865e-07	3.91357e-07	-5.28138e-08		755.509	-5.88947e-07	-5.11982e-07
756.473	5.66732e-07	3.7237e-07	-5.19239e-08		755.991	-3.46867e-07	-5.50922e-07
756.955	5.45401e-07	3.53158e-07	-4.98273e-08		756.473	-1.41056e-07	-6.29936e-07
757.437	5.24767e-07	3.33342e-07	-4.64002e-08		756.955	-3.04476e-08	-4.84956e-07
757.919	5.04935e-07	3.12625e-07	-4.15147e-08		757.437	-2.9582e-08	4.46497e-08
758.402	4.85999e-07	2.9084e-07	-3.50727e-08		757.919	-1.09678e-07	9.13259e-07
758.884	4.68048e-07	2.67972e-07	-2.70313e-08		758.402	-2.18918e-07	1.87488e-06
759.366	4.51162e-07	2.44148e-07	-1.74059e-08		758.884	-3.03615e-07	2.605e-06
759.848	4.35411e-07	2.19606e-07	-6.25355e-09		759.366	-3.26883e-07	2.86034e-06
760.33	4.20861e-07	1.94643e-07	6.35761e-09		759.848	-2.77751e-07	2.6015e-06
760.812	4.07564e-07	1.69568e-07	2.03712e-08		760.33	-1.72411e-07	2.00369e-06
761.294	3.95567e-07	1.44665e-07	3.5754e-08		760.812	-4.49064e-08	1.36016e-06
761.776	3.84906e-07	1.20176e-07	5.24835e-08		761.294	6.51694e-08	9.27291e-07
762.259	3.7561e-07	9.63012e-08	7.05221e-08		761.776	1.29721e-07	8.06407e-07
762.741	3.67698e-07	7.32085e-08	8.97878e-08		762.259	1.46283e-07	9.11528e-07
763.223	3.61178e-07	5.10545e-08	1.10138e-07		762.741	1.43883e-07	1.04795e-06
763.705	3.56053e-07	3.00028e-08	1.31375e-07		763.223	1.77322e-07	1.03805e-06
764.187	3.52314e-07	1.02379e-08	1.53267e-07		763.705	3.07117e-07	8.30007e-07
764.669	3.49942e-07	-8.03679e-09	1.7559e-07		764.187	5.71513e-07	5.17175e-07
765.151	3.48911e-07	-2.46161e-08	1.98164e-07		764.669	9.63516e-07	2.71002e-07
765.634	3.49185e-07	-3.93306e-08	2.20865e-07		765.151	1.42184e-06	2.2265e-07
766.116	3.50718e-07	-5.20923e-08	2.43634e-07		765.634	1.84268e-06	3.74162e-07
766.598	3.53458e-07	-6.29381e-08	2.66439e-07		766.116	2.11162e-06	5.86905e-07
767.08	3.57344e-07	-7.20546e-08	2.89251e-07		766.598	2.14136e-06	6.60269e-07
767.562	3.62305e-07	-7.97752e-08	3.12005e-07		767.08	1.90304e-06	4.45845e-07
768.044	3.68266e-07	-8.65434e-08	3.34582e-07		767.562	1.43806e-06	-6.1784e-08
768.526	3.75144e-07	-9.28473e-08	3.56817e-07		768.044	8.4133e-07	-7.19056e-07
769.009	3.82849e-07	-9.91405e-08	3.78517e-07		768.526	2.2408e-07	-1.3107e-06
769.491	3.91288e-07	-1.05772e-07	3.99494e-07		769.009	-3.28852e-07	-1.66675e-06
769.973	4.00362e-07	-1.12941e-07	4.19593e-07		769.491	-7.87695e-07	-1.74755e-06
770.455	4.09969e-07	-1.20696e-07	4.38716e-07		769.973	-1.17904e-06	-1.65352e-06
770.937	4.20002e-07	-1.28964e-07	4.56825e-07		770.455	-1.5579e-06	-1.54913e-06
771.419	4.30353e-07	-1.37613e-07	4.73935e-07		770.937	-1.96205e-06	-1.55582e-06
771.901	4.40913e-07	-1.46498e-07	4.90095e-07		771.419	-2.37421e-06	-1.67317e-06
772.384	4.51569e-07	-1.55501e-07	5.05355e-07		771.901	-2.71061e-06	-1.78368e-06
772.866	4.6221e-07	-1.64539e-07	5.19742e-07		772.384	-2.84265e-06	-1.73109e-06
773.348	4.72725e-07	-1.73541e-07	5.33228e-07		772.866	-2.64812e-06	-1.43371e-06
773.83	4.83003e-07	-1.82422e-07	5.45708e-07		773.348	-2.06636e-06	-9.5251e-07
774.312	4.92936e-07	-1.9106e-07	5.5699e-07		773.83	-1.13354e-06	-4.76438e-07
774.794	5.02419e-07	-1.9929e-07	5.66801e-07		774.312	1.47476e-08	-2.25193e-07
775.276	5.11347e-07	-2.06923e-07	5.74804e-07		774.794	1.17731e-06	-3.2654e-07
775.758	5.19622e-07	-2.13785e-07	5.80637e-07		775.276	2.14287e-06	-7.34156e-07
776.241	5.27151e-07	-2.19754e-07	5.83949e-07		775.758	2.74417e-06	-1.24402e-06
776.723	5.33843e-07	-2.24795e-07	5.84441e-07		776.241	2.89769e-06	-1.59285e-06
777.205	5.39616e-07	-2.28962e-07	5.8189e-07		776.723	2.61542e-06	-1.59552e-06
777.687	5.44394e-07	-2.32382e-07	5.76163e-07		777.205	1.99453e-06	-1.23921e-06
778.169	5.48109e-07	-2.35206e-07	5.67212e-07		777.687	1.18643e-06	-6.85394e-07
778.651	5.50699e-07	-2.37569e-07	5.5506e-07		778.169	3.62675e-07	-1.7971e-07
779.133	5.5211e-07	-2.39543e-07	5.3978e-07		778.651	-3.20419e-07	7.69367e-08
779.616	5.52296e-07	-2.41123e-07	5.21486e-07		779.133	-7.49145e-07	2.74783e-08
780.098	5.51221e-07	-2.42233e-07	5.00322e-07		779.616	-8.71668e-07	-2.31383e-07
780.58	5.48852e-07	-2.42756e-07	4.76468e-07		780.098	-7.03662e-07	-5.22589e-07
781.062	5.45169e-07	-2.42586e-07	4.50147e-07		780.58	-3.2597e-07	-7.01496e-07
781.544	5.40156e-07	-2.41672e-07	4.2163e-07		781.062	1.36068e-07	-7.37032e-07
782.026	5.33809e-07	-2.40054e-07	3.91235e-07		781.544	5.42634e-07	-7.17848e-07
782.508	5.26127e-07	-2.37866e-07	3.59319e-07		782.026	7.80404e-07	-7.82988e-07
782.991	5.17121e-07	-2.35318e-07	3.26256e-07		782.508	7.98265e-07	-1.02202e-06
783.473	5.06807e-07	-2.32646e-07	2.92412e-07		782.991	6.29199e-07	-1.40549e-06
783.955	4.95207e-07	-2.3005e-07	2.58116e-07		783.473	3.7786e-07	-1.78795e-06
784.437	4.82353e-07	-2.27636e-07	2.23639e-07		783.955	1.81058e-07	-1.98297e-06
784.919	4.68279e-07	-2.25385e-07	1.89172e-07		784.437	1.52132e-07	-1.86677e-06
785.401	4.53028e-07	-2.23144e-07	1.54818e-07		784.919	3.35366e-07	-1.44915e-06
785.883	4.36646e-07	-2.20653e-07	1.20604e-07		785.401	6.85619e-07	-8.69324e-07
786.365	4.19185e-07	-2.17586e-07	8.64948e-08		785.883	1.08767e-06	-3.20601e-07
786.848	4.00701e-07	-2.136e-07	5.24234e-08		786.365	1.40189e-06	5.07564e-08
787.33	3.81252e-07	-2.08381e-07	1.83275e-08		786.848	1.52166e-06	2.14021e-07
787.812	3.60902e-07	-2.01666e-07	-1.5822e-08		787.33	1.41457e-06	2.49224e-07
788.294	3.39715e-07	-1.93258e-07	-4.99996e-08		787.812	1.13505e-06	2.7764e-07
788.776	3.1776e-07	-1.83028e-07	-8.41255e-08		788.294	7.96137e-07	3.69105e-07
789.258	2.95109e-07	-1.70913e-07	-1.18079e-07		788.776	5.18046e-07	4.88629e-07
789.74	2.71833e-07	-1.56932e-07	-1.51728e-07		789.258	3.73418e-07	5.12599e-07
790.223	2.4801e-07	-1.41196e-07	-1.8495e-07		789.74	3.56785e-07	3.09965e-07
790.705	2.23717e-07	-1.23928e-07	-2.1765e-07		790.223	3.89068e-07	-1.62996e-07
791.187	1.99036e-07	-1.05475e-07	-2.49746e-07		790.705	3.57508e-07	-8.06269e-07
791.669	1.7405e-07	-8.62877e-08	-2.81155e-07		791.187	1.69342e-07	-1.40614e-06
792.151	1.48842e-07	-6.68883e-08	-3.11752e-07		791.669	-2.029e-07	-1.72881e-06
792.633	1.23501e-07	-4.78085e-08	-3.41352e-07		792.151	-7.03867e-07	-1.6386e-06
793.115	9.81137e-08	-2.95229e-08	-3.69703e-07		792.633	-1.2117e-06	-1.16903e-06
793.598	7.27705e-08	-1.23892e-08	-3.96505e-07		793.115	-1.58007e-06	-5.09595e-07
794.08	4.75619e-08	3.39117e-09	-4.21445e-07		793.598	-1.69139e-06	8.90052e-08
794.562	2.2579e-08	1.77856e-08	-4.44244e-07		794.08	-1.49959e-06	4.3597e-07
795.044	-2.08667e-09	3.09157e-08	-4.64681e-07		794.562	-1.04788e-06	4.90504e-07
795.526	-2.63433e-08	4.30215e-08	-4.82622e-07		795.044	-4.59087e-07	3.65792e-07
796.008	-5.00993e-08	5.44114e-08	-4.98011e-07		795.526	1.01431e-07	2.55465e-07
796.49	-7.32632e-08	6.54071e-08	-5.10866e-07		796.008	4.7659e-07	3.19274e-07
796.972	-9.57441e-08	7.6293e-08	-5.21262e-07		796.49	5.6536e-07	5.96858e-07
797.455	-1.17452e-07	8.72747e-08	-5.29333e-07		796.972	3.52732e-07	9.89046e-07
797.937	-1.38297e-07	9.84526e-08	-5.35265e-07		797.455	-8.61264e-08	1.31927e-06
798.419	-1.58194e-07	1.09812e-07	-5.39304e-07		797.937	-6.11102e-07	1.43224e-06
798.901	-1.77057e-07	1.21232e-07	-5.41737e-07		798.419	-1.0579e-06	1.27881e-06
799.383	-1.94805e-07	1.32509e-07	-5.4287e-07		798.901	-1.28651e-06	9.35247e-07
799.865	-2.1136e-07	1.43387e-07	-5.42985e-07		799.383	-1.2205e-06	5.55527e-07
800.347	-2.26647e-07	1.53595e-07	-5.42296e-07		799.865	-8.66933e-07	2.80923e-07
800.83	-2.40598e-07	1.62881e-07	-5.40926e-07		800.347	-3.12406e-07	1.68125e-07
801.312	-2.53148e-07	1.71029e-07	-5.38906e-07		800.83	3.06494e-07	1.68263e-07
801.794	-2.64238e-07	1.77873e-07	-5.36198e-07		801.312	8.45072e-07	1.69688e-07
802.276	-2.73815e-07	1.833e-07	-5.32742e-07		801.794	1.19221e-06	7.26661e-08
802.758	-2.81832e-07	1.87251e-07	-5.28498e-07		802.276	1.29885e-06	-1.46194e-07
803.24	-2.88247e-07	1.89719e-07	-5.23479e-07		802.758	1.18334e-06	-4.22153e-07
803.722	-2.93025e-07	1.90755e-07	-5.17749e-07		803.24	9.11953e-07	-6.39873e-07
804.205	-2.96136e-07	1.9047e-07	-5.11408e-07		803.722	5.6769e-07	-7.01348e-07
804.687	-2.97556e-07	1.89034e-07	-5.04558e-07		804.205	2.18302e-07	-5.76425e-07
805.169	-2.97269e-07	1.86652e-07	-4.97277e-07		804.687	-1.00284e-07	-3.11583e-07
805.651	-2.95262e-07	1.83548e-07	-4.89606e-07		805.169	-3.80558e-07	1.01795e-08
806.133	-2.91529e-07	1.79929e-07	-4.81557e-07		805.651	-6.27689e-07	3.21516e-07
806.615	-2.86071e-07	1.7597e-07	-4.73133e-07		806.133	-8.41227e-07	6.0944e-07
807.097	-2.78893e-07	1.71803e-07	-4.64343e-07		806.615	-1.00486e-06	9.05712e-07
807.58	-2.7001e-07	1.6753e-07	-4.55218e-07		807.097	-1.08927e-06	1.24404e-06
808.062	-2.59438e-07	1.63254e-07	-4.45805e-07		807.58	-1.06595e-06	1.60607e-06
808.544	-2.47204e-07	1.591e-07	-4.36165e-07		808.062	-9.23814e-07	1.90361e-06
809.026	-2.33339e-07	1.55246e-07	-4.2636e-07		808.544	-6.82497e-07	2.00536e-06
809.508	-2.1788e-07	1.51916e-07	-4.16456e-07		809.026	-3.9091e-07	1.80924e-06
809.99	-2.00872e-07	1.49352e-07	-4.06526e-07		809.508	-1.1286e-07	1.31304e-06
810.472	-1.82365e-07	1.47776e-07	-3.96665e-07		809.99	9.67405e-08	6.47382e-07
810.954	-1.62417e-07	1.47331e-07	-3.86984e-07		810.472	2.10668e-07	3.68958e-08
811.437	-1.41088e-07	1.48055e-07	-3.77609e-07		810.954	2.37032e-07	-2.90603e-07
811.919	-1.18448e-07	1.49861e-07	-3.68658e-07		811.437	2.08941e-07	-2.11172e-07
812.401	-9.45691e-08	1.52564e-07	-3.60214e-07		811.919	1.6357e-07	2.35045e-07
812.883	-6.95287e-08	1.5592e-07	-3.52309e-07		812.401	1.21186e-07	8.56638e-07
813.365	-4.34089e-08	1.59684e-07	-3.44909e-07		812.883	7.64765e-08	1.39955e-06
813.847	-1.62955e-08	1.6366e-07	-3.37928e-07		813.365	3.25257e-09	1.65791e-06
814.329	1.17219e-08	1.67743e-07	-3.31236e-07		813.847	-1.26536e-07	1.56244e-06
814.812	4.05504e-08	1.71921e-07	-3.24685e-07		814.329	-3.23762e-07	1.19277e-06
815.294	7.00942e-08	1.76265e-07	-3.18123e-07		814.812	-5.70693e-07	7.18523e-07
815.776	1.00255e-07	1.8089e-07	-3.11393e-07		815.294	-8.21525e-07	3.00313e-07
816.258	1.30932e-07	1.8591e-07	-3.04338e-07		815.776	-1.01369e-06	1.07591e-08
816.74	1.62022e-07	1.91394e-07	-2.9679e-07		816.258	-1.08651e-06	-1.8803e-07
817.222	1.93422e-07	1.97342e-07	-2.88578e-07		816.74	-9.96447e-07	-3.93726e-07
817.704	2.25026e-07	2.03682e-07	-2.79534e-07		817.222	-7.31403e-07	-6.83165e-07
818.187	2.56725e-07	2.1028e-07	-2.69513e-07		817.704	-3.14683e-07	-1.04359e-06
818.669	2.88412e-07	2.16972e-07	-2.58405e-07		818.187	1.97399e-07	-1.36613e-06
819.151	3.19976e-07	2.23593e-07	-2.46144e-07		818.669	7.24919e-07	-1.50086e-06
819.633	3.51308e-07	2.3e-07	-2.32709e-07		819.151	1.17357e-06	-1.3471e-06
820.115	3.82297e-07	2.36087e-07	-2.1811e-07		819.633	1.45294e-06	-9.22117e-07
820.597	4.12833e-07	2.41784e-07	-2.02375e-07		820.115	1.49202e-06	-3.68625e-07
821.079	4.42806e-07	2.47042e-07	-1.85541e-07		820.597	1.26136e-06	1.07777e-07
821.561	4.72107e-07	2.51817e-07	-1.67647e-07		821.079	7.8717e-07	3.35769e-07
822.044	5.00629e-07	2.56065e-07	-1.4874e-07		821.561	1.56668e-07	2.6086e-07
822.526	5.28267e-07	2.59742e-07	-1.2888e-07		822.044	-4.97496e-07	-3.8241e-08
823.008	5.54917e-07	2.62816e-07	-1.08147e-07		822.526	-1.02615e-06	-3.9888e-07
823.49	5.80478e-07	2.65288e-07	-8.66389e-08		823.008	-1.30795e-06	-6.65698e-07
823.972	6.04853e-07	2.67205e-07	-6.44746e-08		823.49	-1.28765e-06	-7.68746e-07
824.454	6.27949e-07	2.68651e-07	-4.17855e-08		823.972	-1.00098e-06	-7.4829e-07
824.936	6.49676e-07	2.69739e-07	-1.87158e-08		824.454	-5.64608e-07	-7.16479e-07
825.419	6.69949e-07	2.7057e-07	4.57643e-09		824.936	-1.39984e-07	-7.81216e-07
825.901	6.88688e-07	2.71203e-07	2.79193e-08		825.419	1.22898e-07	-9.77417e-07
826.383	7.05818e-07	2.71634e-07	5.113e-08		825.901	1.35287e-07	-1.24944e-06
826.865	7.21272e-07	2.71787e-07	7.40284e-08		826.383	-1.00469e-07	-1.48793e-06
827.347	7.34988e-07	2.71526e-07	9.64567e-08		826.865	-4.95342e-07	-1.60128e-06
827.829	7.46912e-07	2.70675e-07	1.18305e-07		827.347	-9.06928e-07	-1.5732e-06
828.311	7.56998e-07	2.69052e-07	1.39527e-07		827.829	-1.19261e-06	-1.4711e-06
828.794	7.65206e-07	2.66484e-07	1.60151e-07		828.311	-1.25772e-06	-1.40263e-06
829.276	7.71505e-07	2.62817e-07	1.80265e-07		828.794	-1.08869e-06	-1.44591e-06
829.758	7.75875e-07	2.5791e-07	1.99997e-07		829.276	-7.51817e-07	-1.59639e-06
830.24	7.783e-07	2.51629e-07	2.19482e-07		829.758	-3.64483e-07	-1.76536e-06
830.722	7.78777e-07	2.43841e-07	2.38835e-07		830.24	-4.9361e-08	-1.82921e-06
831.204	7.77309e-07	2.34425e-07	2.58129e-07		830.722	1.07691e-07	-1.70427e-06
831.686	7.7391e-07	2.23296e-07	2.77383e-07		831.204	8.32955e-08	-1.40096e-06
832.168	7.68601e-07	2.10424e-07	2.96551e-07		831.686	-8.58661e-08	-1.02771e-06
832.651	7.61412e-07	1.95861e-07	3.15521e-07		832.168	-3.22418e-07	-7.36254e-07
833.133	7.52384e-07	1.79735e-07	3.34109e-07		832.651	-5.40728e-07	-6.42702e-07
833.615	7.41563e-07	1.62236e-07	3.52065e-07		833.133	-6.75428e-07	-7.64324e-07
834.097	7.29005e-07	1.43576e-07	3.69085e-07		833.615	-7.0066e-07	-1.01227e-06
834.579	7.14772e-07	1.23954e-07	3.84832e-07		834.097	-6.34279e-07	-1.2409e-06
835.061	6.98936e-07	1.03514e-07	3.98969e-07		834.579	-5.25957e-07	-1.32983e-06
835.543	6.81574e-07	8.23332e-08	4.11201e-07		835.061	-4.34863e-07	-1.24601e-06
836.026	6.62771e-07	6.04236e-08	4.21295e-07		835.543	-4.0724e-07	-1.05847e-06
836.508	6.42618e-07	3.77552e-08	4.29098e-07		836.026	-4.55326e-07	-8.92012e-07
836.99	6.2121e-07	1.42917e-08	4.34523e-07		836.508	-5.5127e-07	-8.54028e-07
837.472	5.9865e-07	-9.9733e-09	4.37532e-07		836.99	-6.35643e-07	-9.70811e-07
837.954	5.75043e-07	-3.4992e-08	4.3811e-07		837.472	-6.37457e-07	-1.1751e-06
838.436	5.50499e-07	-6.06527e-08	4.36253e-07		837.954	-4.99527e-07	-1.3447e-06
838.918	5.25132e-07	-8.67855e-08	4.31983e-07		838.436	-2.02521e-07	-1.37533e-06
839.401	4.99057e-07	-1.1318e-07	4.25368e-07		838.918	2.26045e-07	-1.2406e-06
839.883	4.72395e-07	-1.39608e-07	4.16558e-07		839.401	7.1236e-07	-1.01134e-06
840.365	4.45266e-07	-1.6585e-07	4.05801e-07		839.883	1.15289e-06	-8.15582e-07
840.847	4.17793e-07	-1.9171e-07	3.9343e-07		840.365	1.44291e-06	-7.69222e-07
841.329	3.90102e-07	-2.17027e-07	3.79836e-07		840.847	1.50607e-06	-9.08693e-07
841.811	3.62318e-07	-2.41678e-07	3.65407e-07		841.329	1.31854e-06	-1.17049e-06
842.293	3.34566e-07	-2.65568e-07	3.5048e-07		841.811	9.18667e-07	-1.41993e-06
842.775	3.06974e-07	-2.88623e-07	3.353e-07		842.293	3.96553e-07	-1.51924e-06
843.258	2.79667e-07	-3.10765e-07	3.20015e-07		842.775	-1.29329e-07	-1.38947e-06
843.74	2.5277e-07	-3.31907e-07	3.0469e-07		843.258	-5.44702e-07	-1.04044e-06
844.222	2.26406e-07	-3.51932e-07	2.89342e-07		843.74	-7.70886e-07	-5.52321e-07
844.704	2.00696e-07	-3.70703e-07	2.73968e-07		844.222	-7.79447e-07	-2.87517e-08
845.186	1.75759e-07	-3.88059e-07	2.58568e-07		844.704	-5.93064e-07	4.52533e-07
845.668	1.51709e-07	-4.03835e-07	2.43142e-07		845.186	-2.69294e-07	8.58809e-07
846.15	1.28655e-07	-4.17875e-07	2.27691e-07		845.668	1.22804e-07	1.19037e-06
846.633	1.06703e-07	-4.30048e-07	2.12204e-07		846.15	5.24086e-07	1.44584e-06
847.115	8.59536e-08	-4.40257e-07	1.96665e-07		846.633	8.97446e-07	1.59984e-06
847.597	6.65003e-08	-4.48449e-07	1.8107e-07		847.115	1.23022e-06	1.60553e-06
848.079	4.84311e-08	-4.54603e-07	1.65447e-07		847.597	1.52434e-06	1.42874e-06
848.561	3.18276e-08	-4.58729e-07	1.49878e-07		848.079	1.7808e-06	1.08616e-06
849.043	1.67641e-08	-4.60857e-07	1.34502e-07		848.561	1.98574e-06	6.68095e-07
849.525	3.30805e-09	-4.61027e-07	1.195e-07		849.043	2.10607e-06	3.15744e-07
850.008	-8.48033e-09	-4.59288e-07	1.05075e-07		849.525	2.09741e-06	1.70686e-07
850.49	-1.85482e-08	-4.55694e-07	9.14101e-08		850.008	1.9236e-06	3.08276e-07
850.972	-2.68501e-08	-4.50296e-07	7.86489e-08		850.49	1.57748e-06	6.97827e-07
851.454	-3.33479e-08	-4.43143e-07	6.68774e-08		850.972	1.09227e-06	1.2067e-06
851.936	-3.80114e-08	-4.34267e-07	5.61248e-08		851.454	5.40359e-07	1.65437e-06
852.418	-4.08179e-08	-4.23684e-07	4.63716e-08		851.936	1.58383e-08	1.88397e-06
852.9	-4.17528e-08	-4.11381e-07	3.7562e-08		852.418	-3.91002e-07	1.82668e-06
853.383	-4.08096e-08	-3.97328e-07	2.96133e-08		852.9	-6.18501e-07	1.51678e-06
853.865	-3.799e-08	-3.81477e-07	2.24212e-08		853.383	-6.51321e-07	1.06288e-06
854.347	-3.33038e-08	-3.63774e-07	1.58609e-08		853.865	-5.20631e-07	5.87844e-07
854.829	-2.6769e-08	-3.44171e-07	9.79306e-09		854.347	-2.88896e-07	1.77206e-07
855.311	-1.84117e-08	-3.22638e-07	4.06982e-09		854.829	-2.59192e-08	-1.45311e-07
855.793	-8.26596e-09	-2.99172e-07	-1.45058e-09		855.311	2.15988e-07	-3.98044e-07
856.275	3.62635e-09	-2.73796e-07	-6.89284e-09		855.793	4.16904e-07	-6.03964e-07
856.757	1.72156e-08	-2.46565e-07	-1.23547e-08		856.275	5.8543e-07	-7.53122e-07
857.24	3.24449e-08	-2.17554e-07	-1.7906e-08		856.757	7.42401e-07	-7.98148e-07
857.722	4.92502e-08	-1.86858e-07	-2.3593e-08		857.24	8.98245e-07	-6.78602e-07
858.204	6.75608e-08	-1.54585e-07	-2.94516e-08		857.722	1.03663e-06	-3.67855e-07
858.686	8.72998e-08	-1.20848e-07	-3.55164e-08		858.204	1.11552e-06	9.42529e-08
859.168	1.08384e-07	-8.57638e-08	-4.18315e-08		858.686	1.08409e-06	5.98766e-07
859.65	1.30726e-07	-4.9446e-08	-4.84523e-08		859.168	9.08498e-07	1.00578e-06
860.132	1.54232e-07	-1.20056e-08	-5.54415e-08		859.65	5.94676e-07	1.19883e-06
860.615	1.78804e-07	2.64451e-08	-6.28586e-08		860.132	1.97082e-07	1.135e-06
861.097	2.04338e-07	6.57837e-08	-7.07488e-08		860.615	-1.95194e-07	8.56974e-07
861.579	2.30728e-07	1.05864e-07	-7.91283e-08		861.097	-4.86806e-07	4.66958e-07
862.061	2.57865e-07	1.46508e-07	-8.79736e-08		861.579	-6.13506e-07	7.47025e-08
862.543	2.85635e-07	1.87494e-07	-9.72129e-08		862.061	-5.67397e-07	-2.51927e-07
863.025	3.13922e-07	2.2857e-07	-1.06727e-07		862.543	-4.02971e-07	-5.06638e-07
863.507	3.4261e-07	2.69457e-07	-1.16354e-07		863.025	-2.17433e-07	-7.26467e-07
863.99	3.71579e-07	3.09875e-07	-1.25911e-07		863.507	-1.137e-07	-9.52019e-07
864.472	4.00709e-07	3.49559e-07	-1.35215e-07		863.99	-1.59522e-07	-1.18656e-06
864.954	4.2988e-07	3.88275e-07	-1.44107e-07		864.472	-3.60999e-07	-1.38572e-06
865.436	4.58973e-07	4.25823e-07	-1.52478e-07		864.954	-6.58229e-07	-1.47889e-06
865.918	4.87867e-07	4.62036e-07	-1.60279e-07		865.436	-9.4891e-07	-1.41082e-06
866.4	5.16445e-07	4.96766e-07	-1.67518e-07		865.918	-1.12628e-06	-1.1808e-06
866.882	5.4459e-07	5.29875e-07	-1.74243e-07		866.4	-1.11725e-06	-8.52717e-07
867.364	5.72185e-07	5.61225e-07	-1.80525e-07		866.882	-9.08685e-07	-5.30336e-07
867.847	5.99118e-07	5.90682e-07	-1.86427e-07		867.364	-5.50726e-07	-3.12369e-07
868.329	6.25278e-07	6.18124e-07	-1.91995e-07		867.847	-1.40312e-07	-2.47767e-07
868.811	6.50556e-07	6.43451e-07	-1.9725e-07		868.329	2.08624e-07	-3.2109e-07
869.293	6.74847e-07	6.66594e-07	-2.02198e-07		868.811	3.99931e-07	-4.69377e-07
869.775	6.98047e-07	6.87509e-07	-2.06844e-07		869.293	3.80375e-07	-6.2339e-07
870.257	7.20059e-07	7.0617e-07	-2.11208e-07		869.775	1.51547e-07	-7.46417e-07
870.739	7.40786e-07	7.22552e-07	-2.15335e-07		870.257	-2.33762e-07	-8.49271e-07
871.222	7.60138e-07	7.36617e-07	-2.19298e-07		870.739	-6.91107e-07	-9.72543e-07
871.704	7.78027e-07	7.48299e-07	-2.23188e-07		871.222	-1.13161e-06	-1.15288e-06
872.186	7.94371e-07	7.57503e-07	-2.27095e-07		871.704	-1.48551e-06	-1.38569e-06
872.668	8.09089e-07	7.64101e-07	-2.31088e-07		872.186	-1.72208e-06	-1.61759e-06
873.15	8.22109e-07	7.67937e-07	-2.35191e-07		872.668	-1.85023e-06	-1.76587e-06
873.632	8.33361e-07	7.68841e-07	-2.39371e-07		873.15	-1.90867e-06	-1.76016e-06
874.114	8.42779e-07	7.66632e-07	-2.43524e-07		873.632	-1.94729e-06	-1.57926e-06
874.597	8.50304e-07	7.6114e-07	-2.47481e-07		874.114	-2.00435e-06	-1.26773e-06
875.079	8.55881e-07	7.52213e-07	-2.51014e-07		874.597	-2.08847e-06	-9.157e-07
875.561	8.59461e-07	7.39739e-07	-2.53859e-07		875.079	-2.17336e-06	-6.21084e-07
876.043	8.61e-07	7.23666e-07	-2.55743e-07		875.561	-2.20604e-06	-4.46995e-07
876.525	8.60461e-07	7.04008e-07	-2.5641e-07		876.043	-2.1285e-06	-4.03872e-07
877.007	8.57811e-07	6.80855e-07	-2.55646e-07		876.525	-1.90401e-06	-4.57455e-07
877.489	8.53025e-07	6.54353e-07	-2.53303e-07		877.007	-1.53819e-06	-5.61733e-07
877.971	8.46087e-07	6.24686e-07	-2.49299e-07		877.489	-1.08232e-06	-6.89928e-07
878.454	8.36984e-07	5.92039e-07	-2.43619e-07		877.971	-6.20895e-07	-8.49926e-07
878.936	8.25713e-07	5.5658e-07	-2.36301e-07		878.454	-2.44689e-07	-1.06901e-06
879.418	8.12277e-07	5.18443e-07	-2.27422e-07		878.936	-2.13765e-08	-1.36627e-06
879.9	7.96687e-07	4.77735e-07	-2.17074e-07		879.418	2.43028e-08	-1.72081e-06
880.382	7.78961e-07	4.34554e-07	-2.05352e-07		879.9	-8.68738e-08	-2.06574e-06
880.864	7.59124e-07	3.89014e-07	-1.92348e-07		880.382	-2.99297e-07	-2.30596e-06
881.346	7.37207e-07	3.41265e-07	-1.78147e-07		880.864	-5.44774e-07	-2.35727e-06
881.829	7.13251e-07	2.91498e-07	-1.62827e-07		881.346	-7.64422e-07	-2.18358e-06
882.311	6.87302e-07	2.39924e-07	-1.4647e-07		881.829	-9.22076e-07	-1.81795e-06
882.793	6.59411e-07	1.86751e-07	-1.29163e-07		882.311	-1.00556e-06	-1.34843e-06
883.275	6.29639e-07	1.32152e-07	-1.11008e-07		882.793	-1.01961e-06	-8.86533e-07
883.757	5.9805e-07	7.62391e-08	-9.21173e-08		883.275	-9.708e-07	-5.23373e-07
884.239	5.64716e-07	1.90671e-08	-7.2621e-08		883.757	-8.59011e-07	-3.04585e-07
884.721	5.29716e-07	-3.93483e-08	-5.2657e-08		884.239	-6.76661e-07	-2.26753e-07
885.204	4.93132e-07	-9.89939e-08	-3.23684e-08		884.721	-4.15096e-07	-2.56261e-07
885.686	4.55055e-07	-1.59818e-07	-1.18936e-08		885.204	-7.70189e-08	-3.52203e-07
886.168	4.1558e-07	-2.217e-07	8.63977e-09		885.686	3.14233e-07	-4.84627e-07
886.65	3.7481e-07	-2.84437e-07	2.912e-08		886.168	7.15304e-07	-6.32908e-07
887.132	3.32851e-07	-3.47749e-07	4.94488e-08		886.65	1.06943e-06	-7.77997e-07
887.614	2.89817e-07	-4.11308e-07	6.95375e-08		887.132	1.3215e-06	-8.8953e-07
888.096	2.45825e-07	-4.74765e-07	8.92959e-08		887.614	1.4336e-06	-9.29115e-07
888.579	2.00999e-07	-5.37791e-07	1.0862e-07		888.096	1.39383e-06	-8.64009e-07
889.061	1.55467e-07	-6.00101e-07	1.27383e-07		888.579	1.22133e-06	-6.89004e-07
889.543	1.09362e-07	-6.61467e-07	1.4543e-07		889.061	9.6284e-07	-4.38421e-07
890.025	6.28203e-08	-7.21724e-07	1.62576e-07		889.543	6.83684e-07	-1.82434e-07
890.507	1.59841e-08	-7.80757e-07	1.78622e-07		890.025	4.5621e-07	5.76953e-10
890.989	-3.10018e-08	-8.3848e-07	1.93367e-07		890.507	3.44675e-07	5.46263e-08
891.471	-7.79891e-08	-8.94815e-07	2.06625e-07		890.989	3.87906e-07	-2.57372e-08
891.953	-1.24826e-07	-9.49666e-07	2.18245e-07		891.471	5.88213e-07	-1.92228e-07
892.436	-1.71358e-07	-1.00291e-06	2.28119e-07		891.953	9.08537e-07	-3.63154e-07
892.918	-2.17428e-07	-1.0544e-06	2.36187e-07		892.436	1.27867e-06	-4.59064e-07
893.4	-2.62877e-07	-1.10395e-06	2.42433e-07		892.918	1.61468e-06	-4.33108e-07
893.882	-3.07543e-07	-1.15139e-06	2.46877e-07		893.4	1.84287e-06	-2.86433e-07
894.364	-3.51265e-07	-1.19656e-06	2.4956e-07		893.882	1.92326e-06	-5.60793e-08
894.846	-3.93878e-07	-1.23931e-06	2.50529e-07		894.364	1.86504e-06	2.10154e-07
895.328	-4.3522e-07	-1.27952e-06	2.49838e-07		894.846	1.72468e-06	4.80673e-07
895.811	-4.75125e-07	-1.31709e-06	2.47539e-07		895.328	1.58418e-06	7.4965e-07
896.293	-5.13432e-07	-1.35192e-06	2.43697e-07		895.811	1.51832e-06	1.02839e-06
896.775	-5.49978e-07	-1.38388e-06	2.38397e-07		896.293	1.56293e-06	1.32102e-06
897.257	-5.84604e-07	-1.41282e-06	2.31757e-07		896.775	1.69681e-06	1.6055e-06
897.739	-6.17152e-07	-1.43859e-06	2.23936e-07		897.257	1.84941e-06	1.82871e-06
898.221	-6.47469e-07	-1.46102e-06	2.15127e-07		897.739	1.9315e-06	1.9263e-06
898.703	-6.75405e-07	-1.47995e-06	2.05548e-07		898.221	1.87559e-06	1.85182e-06
899.186	-7.00815e-07	-1.49527e-06	1.95415e-07		898.703	1.67165e-06	1.6063e-06
899.668	-7.23559e-07	-1.50688e-06	1.84925e-07		899.186	1.37846e-06	1.24521e-06
900.15	-7.43506e-07	-1.51468e-06	1.74238e-07		899.668	1.10558e-06	8.62671e-07
900.632	-7.60527e-07	-1.51861e-06	1.63467e-07		900.15	9.72495e-07	5.56135e-07
901.114	-7.74504e-07	-1.51858e-06	1.52688e-07		900.632	1.05849e-06	3.91741e-07
901.596	-7.85325e-07	-1.51454e-06	1.41948e-07		901.114	1.36665e-06	3.81806e-07
902.078	-7.92886e-07	-1.50643e-06	1.3128e-07		901.596	1.8177e-06	4.90029e-07
902.56	-7.97092e-07	-1.49427e-06	1.20715e-07		902.078	2.27397e-06	6.53579e-07
903.043	-7.97859e-07	-1.47811e-06	1.10288e-07		902.56	2.59028e-06	8.14566e-07
903.525	-7.95109e-07	-1.45809e-06	1.0003e-07		903.043	2.6666e-06	9.43549e-07
904.007	-7.88777e-07	-1.43438e-06	8.99652e-08		903.525	2.48276e-06	1.04275e-06
904.489	-7.78809e-07	-1.40718e-06	8.01088e-08		904.007	2.10644e-06	1.13239e-06
904.971	-7.65161e-07	-1.37668e-06	7.04674e-08		904.489	1.66599e-06	1.23209e-06
905.453	-7.47801e-07	-1.34302e-06	6.1048e-08		904.971	1.30405e-06	1.34397e-06
905.935	-7.26711e-07	-1.30631e-06	5.18725e-08		905.453	1.12988e-06	1.45314e-06
906.418	-7.01883e-07	-1.2666e-06	4.29877e-08		905.935	1.18777e-06	1.53847e-06
906.9	-6.73323e-07	-1.22388e-06	3.44725e-08		906.418	1.44956e-06	1.5876e-06
907.382	-6.4105e-07	-1.17813e-06	2.64326e-08		906.9	1.83391e-06	1.60612e-06
907.864	-6.05098e-07	-1.12932e-06	1.89888e-08		907.382	2.23552e-06	1.61433e-06
908.346	-5.65511e-07	-1.07739e-06	1.22602e-08		907.864	2.55758e-06	1.6335e-06
908.828	-5.2235e-07	-1.02229e-06	6.34903e-09		908.346	2.73386e-06	1.6714e-06
909.31	-4.75686e-07	-9.64005e-07	1.32949e-09		908.828	2.73744e-06	1.71563e-06
909.793	-4.25605e-07	-9.025e-07	-2.75256e-09		909.31	2.57714e-06	1.74273e-06
910.275	-3.72205e-07	-8.37781e-07	-5.87622e-09		909.793	2.28751e-06	1.73179e-06
910.757	-3.15598e-07	-7.69886e-07	-8.03499e-09		910.275	1.91608e-06	1.68296e-06
911.239	-2.55907e-07	-6.98894e-07	-9.22895e-09		910.757	1.51243e-06	1.61995e-06
911.721	-1.93268e-07	-6.24932e-07	-9.45922e-09		911.239	1.11818e-06	1.58053e-06
912.203	-1.27827e-07	-5.48184e-07	-8.72763e-09		911.721	7.60425e-07	1.59257e-06
912.685	-5.97438e-08	-4.68889e-07	-7.04044e-09		912.203	4.50823e-07	1.65578e-06
913.168	1.08141e-08	-3.87331e-07	-4.41446e-09		912.685	1.86117e-07	1.73102e-06
913.65	8.36685e-08	-3.03835e-07	-8.81581e-10		913.168	-4.27363e-08	1.75504e-06
914.132	1.58632e-07	-2.18743e-07	3.50661e-09		913.65	-2.41795e-07	1.66421e-06
914.614	2.3551e-07	-1.32388e-07	8.67936e-09		914.132	-4.06814e-07	1.42533e-06
915.096	3.14098e-07	-4.50695e-08	1.4549e-08		914.614	-5.20553e-07	1.04931e-06
915.578	3.94188e-07	4.29754e-08	2.10166e-08		915.096	-5.59737e-07	5.91884e-07
916.06	4.75564e-07	1.3159e-07	2.79773e-08		915.578	-5.09319e-07	1.28894e-07
916.542	5.58005e-07	2.20692e-07	3.5327e-08		916.06	-3.77625e-07	-2.70978e-07
917.025	6.41286e-07	3.10257e-07	4.29654e-08		916.542	-2.04441e-07	-5.68809e-07
917.507	7.25178e-07	4.00268e-07	5.07979e-08		917.025	-5.69307e-08	-7.60503e-07
917.989	8.0945e-07	4.90678e-07	5.87338e-08		917.507	-9.29413e-09	-8.69524e-07
918.471	8.93865e-07	5.81362e-07	6.66847e-08		917.989	-1.1375e-07	-9.26715e-07
918.953	9.78189e-07	6.72107e-07	7.45596e-08		918.471	-3.78216e-07	-9.57262e-07
919.435	1.06218e-06	7.62614e-07	8.22645e-08		918.953	-7.57562e-07	-9.73217e-07
919.917	1.14561e-06	8.52536e-07	8.97021e-08		919.435	-1.1659e-06	-9.8166e-07
920.4	1.22823e-06	9.41529e-07	9.67768e-08		919.917	-1.50548e-06	-9.92212e-07
920.882	1.30982e-06	1.02929e-06	1.03399e-07		920.4	-1.69952e-06	-1.02785e-06
921.364	1.39012e-06	1.11557e-06	1.09491e-07		920.882	-1.71717e-06	-1.11934e-06
921.846	1.46892e-06	1.20021e-06	1.1499e-07		921.364	-1.58309e-06	-1.29414e-06
922.328	1.54598e-06	1.28305e-06	1.19845e-07		921.846	-1.3636e-06	-1.56263e-06
922.81	1.62109e-06	1.36394e-06	1.24007e-07		922.328	-1.14069e-06	-1.91161e-06
923.292	1.69401e-06	1.44266e-06	1.27423e-07		922.81	-9.82398e-07	-2.30553e-06
923.775	1.76455e-06	1.51893e-06	1.30025e-07		923.292	-9.24003e-07	-2.70178e-06
924.257	1.83249e-06	1.59238e-06	1.31724e-07		923.775	-9.64448e-07	-3.06298e-06
924.739	1.89764e-06	1.66261e-06	1.32408e-07		924.257	-1.08104e-06	-3.36814e-06
925.221	1.95981e-06	1.72921e-06	1.31952e-07		924.739	-1.24967e-06	-3.61121e-06
925.703	2.01882e-06	1.79179e-06	1.30224e-07		925.221	-1.46e-06	-3.79294e-06
926.185	2.0745e-06	1.85004e-06	1.27106e-07		925.703	-1.7209e-06	-3.91037e-06
926.667	2.12669e-06	1.90373e-06	1.2251e-07		926.185	-2.05019e-06	-3.95449e-06
927.149	2.17525e-06	1.95267e-06	1.16388e-07		926.667	-2.45591e-06	-3.91448e-06
927.632	2.22003e-06	1.99676e-06	1.08742e-07		927.149	-2.92086e-06	-3.79155e-06
928.114	2.26091e-06	2.03593e-06	9.96308e-08		927.632	-3.3945e-06	-3.60651e-06
928.596	2.29777e-06	2.07013e-06	8.91568e-08		928.114	-3.79979e-06	-3.40339e-06
929.078	2.33051e-06	2.09934e-06	7.74571e-08		928.596	-4.05286e-06	-3.23553e-06
929.56	2.35905e-06	2.12358e-06	6.46815e-08		929.078	-4.08523e-06	-3.14724e-06
930.042	2.38331e-06	2.14288e-06	5.0975e-08		929.56	-3.86826e-06	-3.15596e-06
930.524	2.40322e-06	2.15732e-06	3.64593e-08		930.042	-3.42448e-06	-3.24585e-06
931.007	2.41872e-06	2.16702e-06	2.1227e-08		930.524	-2.82759e-06	-3.3743e-06
931.489	2.42979e-06	2.17213e-06	5.34302e-09		931.007	-2.18985e-06	-3.49272e-06
931.971	2.4364e-06	2.17278e-06	-1.1142e-08		931.489	-1.63642e-06	-3.56382e-06
932.453	2.43852e-06	2.16913e-06	-2.81742e-08		931.971	-1.2771e-06	-3.57513e-06
932.935	2.43617e-06	2.1613e-06	-4.56772e-08		932.453	-1.1817e-06	-3.53766e-06
933.417	2.42933e-06	2.14938e-06	-6.3542e-08		932.935	-1.36354e-06	-3.47475e-06
933.899	2.41804e-06	2.1334e-06	-8.16251e-08		933.417	-1.77618e-06	-3.406e-06
934.382	2.40231e-06	2.11335e-06	-9.97582e-08		933.899	-2.32603e-06	-3.33956e-06
934.864	2.3822e-06	2.0892e-06	-1.17765e-07		934.382	-2.89336e-06	-3.27078e-06
935.346	2.35773e-06	2.06093e-06	-1.35476e-07		934.864	-3.36334e-06	-3.19275e-06
935.828	2.32898e-06	2.02856e-06	-1.52746e-07		935.346	-3.65399e-06	-3.10596e-06
936.31	2.29599e-06	1.99214e-06	-1.69453e-07		935.828	-3.7357e-06	-3.02547e-06
936.792	2.25885e-06	1.95182e-06	-1.85499e-07		936.31	-3.63413e-06	-2.97286e-06
937.274	2.21762e-06	1.90779e-06	-2.00805e-07		936.792	-3.41668e-06	-2.96686e-06
937.756	2.17239e-06	1.86028e-06	-2.15306e-07		937.274	-3.16671e-06	-3.00779e-06
938.239	2.12325e-06	1.80954e-06	-2.28954e-07		937.756	-2.95426e-06	-3.07307e-06
938.721	2.07029e-06	1.75578e-06	-2.41719e-07		938.239	-2.81324e-06	-3.12083e-06
939.203	2.01362e-06	1.6992e-06	-2.536e-07		938.721	-2.73442e-06	-3.10639e-06
939.685	1.95333e-06	1.63994e-06	-2.64624e-07		939.203	-2.6738e-06	-2.99678e-06
940.167	1.88953e-06	1.57815e-06	-2.74839e-07		939.685	-2.57451e-06	-2.7866e-06
940.649	1.82235e-06	1.51396e-06	-2.84295e-07		940.167	-2.39141e-06	-2.49715e-06
941.131	1.75189e-06	1.44748e-06	-2.93023e-07		940.649	-2.11008e-06	-2.16902e-06
941.614	1.67827e-06	1.37885e-06	-3.0101e-07		941.131	-1.75347e-06	-1.84683e-06
942.096	1.60162e-06	1.30819e-06	-3.08182e-07		941.614	-1.37278e-06	-1.56855e-06
942.578	1.52207e-06	1.23561e-06	-3.14406e-07		942.096	-1.02755e-06	-1.35478e-06
943.06	1.43973e-06	1.16124e-06	-3.19499e-07		942.578	-7.64284e-07	-1.20969e-06
943.542	1.35475e-06	1.08516e-06	-3.23255e-07		943.06	-5.97348e-07	-1.12147e-06
944.024	1.26725e-06	1.00751e-06	-3.25477e-07		943.542	-5.0646e-07	-1.06594e-06
944.506	1.17737e-06	9.28411e-07	-3.26004e-07		944.024	-4.46004e-07	-1.01036e-06
944.989	1.08525e-06	8.48026e-07	-3.24725e-07		944.506	-3.63097e-07	-9.18731e-07
945.471	9.91025e-07	7.66526e-07	-3.21588e-07		944.989	-2.20542e-07	-7.57386e-07
945.953	8.94838e-07	6.84079e-07	-3.16595e-07		945.471	-1.11809e-08	-5.08945e-07
946.435	7.96835e-07	6.0082e-07	-3.09791e-07		945.953	2.38759e-07	-1.81768e-07
946.917	6.97162e-07	5.16836e-07	-3.01254e-07		946.435	4.77804e-07	1.84118e-07
947.399	5.95969e-07	4.32151e-07	-2.91087e-07		946.917	6.45802e-07	5.22975e-07
947.881	4.93409e-07	3.46738e-07	-2.7941e-07		947.399	6.93731e-07	7.60842e-07
948.364	3.89636e-07	2.60532e-07	-2.66362e-07		947.881	5.98667e-07	8.42998e-07
948.846	2.84811e-07	1.73454e-07	-2.52098e-07		948.364	3.71807e-07	7.54917e-07
949.328	1.79095e-07	8.54395e-08	-2.36787e-07		948.846	5.64329e-08	5.3387e-07
949.81	7.26523e-08	-3.55185e-09	-2.20604e-07		949.328	-2.81488e-07	2.58513e-07
950.292	-3.4347e-08	-9.3528e-08	-2.03722e-07		949.81	-5.70134e-07	2.25405e-08
950.774	-1.41731e-07	-1.84469e-07	-1.863e-07		950.292	-7.47635e-07	-1.01227e-07
951.256	-2.49322e-07	-2.76339e-07	-1.68474e-07		950.774	-7.76108e-07	-8.49689e-08
951.738	-3.56941e-07	-3.69098e-07	-1.50343e-07		951.256	-6.49654e-07	4.2268e-08
952.221	-4.64403e-07	-4.62708e-07	-1.31975e-07		951.738	-3.94074e-07	2.11589e-07
952.703	-5.7152e-07	-5.57141e-07	-1.13395e-07		952.221	-5.91593e-08	3.42766e-07
953.185	-6.78099e-07	-6.52373e-07	-9.4599e-08		952.703	2.93885e-07	3.80053e-07
953.667	-7.83944e-07	-7.48378e-07	-7.55588e-08		953.185	6.07108e-07	3.12062e-07
954.149	-8.88855e-07	-8.45121e-07	-5.62339e-08		953.667	8.39492e-07	1.76623e-07
954.631	-9.9263e-07	-9.42547e-07	-3.65865e-08		954.149	9.73223e-07	3.95094e-08
955.113	-1.09506e-06	-1.04057e-06	-1.65896e-08		954.631	1.01345e-06	-3.18519e-08
955.596	-1.19594e-06	-1.13907e-06	3.76258e-09		955.113	9.81244e-07	1.33917e-09
956.078	-1.29505e-06	-1.23791e-06	2.44518e-08		955.596	9.03811e-07	1.38684e-07
956.56	-1.39219e-06	-1.33691e-06	4.54341e-08		956.078	8.06545e-07	3.41077e-07
957.042	-1.48713e-06	-1.43588e-06	6.66421e-08		956.56	7.09206e-07	5.53614e-07
957.524	-1.57966e-06	-1.53463e-06	8.79864e-08		957.042	6.27494e-07	7.28541e-07
958.006	-1.66956e-06	-1.63297e-06	1.09359e-07		957.524	5.78734e-07	8.45411e-07
958.488	-1.75661e-06	-1.73071e-06	1.30633e-07		958.006	5.85717e-07	9.14263e-07
958.971	-1.8406e-06	-1.82769e-06	1.51665e-07		958.488	6.75727e-07	9.7046e-07
959.453	-1.9213e-06	-1.92372e-06	1.72297e-07		958.971	8.7287e-07	1.05473e-06
959.935	-1.99851e-06	-2.01861e-06	1.92363e-07		959.453	1.18582e-06	1.1986e-06
960.417	-2.07201e-06	-2.11214e-06	2.11696e-07		959.935	1.59751e-06	1.4102e-06
960.899	-2.14159e-06	-2.20404e-06	2.30139e-07		960.417	2.06448e-06	1.67444e-06
961.381	-2.20703e-06	-2.29402e-06	2.47554e-07		960.899	2.52324e-06	1.9577e-06
961.863	-2.26813e-06	-2.38175e-06	2.63828e-07		961.381	2.90851e-06	2.2235e-06
962.345	-2.32469e-06	-2.4669e-06	2.78874e-07		961.863	3.17222e-06	2.44143e-06
962.828	-2.37651e-06	-2.54914e-06	2.92621e-07		962.345	3.2992e-06	2.59708e-06
963.31	-2.4234e-06	-2.62818e-06	3.0501e-07		962.828	3.31001e-06	2.69404e-06
963.792	-2.46517e-06	-2.70373e-06	3.15982e-07		963.31	3.25214e-06	2.75372e-06
964.274	-2.50165e-06	-2.77548e-06	3.25471e-07		963.792	3.17842e-06	2.80757e-06
964.756	-2.53267e-06	-2.84313e-06	3.33403e-07		964.274	3.12862e-06	2.89084e-06
965.238	-2.55806e-06	-2.90631e-06	3.39702e-07		964.756	3.11522e-06	3.03127e-06
965.72	-2.57768e-06	-2.9646e-06	3.44294e-07		965.238	3.12605e-06	3.24293e-06
966.203	-2.59138e-06	-3.01754e-06	3.47118e-07		965.72	3.13917e-06	3.51955e-06
966.685	-2.59905e-06	-3.0646e-06	3.48129e-07		966.203	3.14131e-06	3.83609e-06
967.167	-2.60057e-06	-3.10526e-06	3.47303e-07		966.685	3.14399e-06	4.15414e-06
967.649	-2.59584e-06	-3.139e-06	3.44636e-07		967.167	3.18653e-06	4.4331e-06
968.131	-2.58478e-06	-3.16534e-06	3.40134e-07		967.649	3.32349e-06	4.64137e-06
968.613	-2.56733e-06	-3.18384e-06	3.33815e-07		968.131	3.60265e-06	4.76677e-06
969.095	-2.54345e-06	-3.19412e-06	3.25704e-07		968.613	4.04191e-06	4.81615e-06
969.578	-2.5131e-06	-3.19585e-06	3.15832e-07		969.095	4.61184e-06	4.81357e-06
970.06	-2.47627e-06	-3.18874e-06	3.04236e-07		969.578	5.23598e-06	4.78805e-06
970.542	-2.43299e-06	-3.17251e-06	2.90961e-07		970.06	5.80657e-06	4.76135e-06
971.024	-2.38329e-06	-3.14694e-06	2.76059e-07		970.542	6.21296e-06	4.74061e-06
971.506	-2.32722e-06	-3.11182e-06	2.59591e-07		971.024	6.37171e-06	4.71758e-06
971.988	-2.26487e-06	-3.06695e-06	2.41623e-07		971.506	6.25118e-06	4.67254e-06
972.47	-2.19633e-06	-3.01214e-06	2.22228e-07		971.988	5.87941e-06	4.58567e-06
972.952	-2.12174e-06	-2.94724e-06	2.01487e-07		972.47	5.33389e-06	4.44303e-06
973.435	-2.04124e-06	-2.87209e-06	1.79496e-07		972.952	4.72017e-06	4.2422e-06
973.917	-1.955e-06	-2.78659e-06	1.56365e-07		973.435	4.14236e-06	3.99049e-06
974.399	-1.86323e-06	-2.6907e-06	1.32226e-07		973.917	3.67688e-06	3.70292e-06
974.881	-1.76614e-06	-2.58446e-06	1.07233e-07		974.399	3.35794e-06	3.39769e-06
975.363	-1.66397e-06	-2.46797e-06	8.15583e-08		974.881	3.17579e-06	3.09569e-06
975.845	-1.55698e-06	-2.34149e-06	5.53932e-08		975.363	3.08718e-06	2.81882e-06
976.327	-1.44545e-06	-2.20533e-06	2.89394e-08		975.845	3.03535e-06	2.59076e-06
976.81	-1.32969e-06	-2.05992e-06	2.40431e-09		976.327	2.96895e-06	2.43168e-06
977.292	-1.21003e-06	-1.90578e-06	-2.40041e-08		976.81	2.85512e-06	2.3553e-06
977.774	-1.0868e-06	-1.74349e-06	-5.00809e-08		977.292	2.68517e-06	2.36011e-06
978.256	-9.60353e-07	-1.57371e-06	-7.56267e-08		977.774	2.4712e-06	2.42717e-06
978.738	-8.31074e-07	-1.39713e-06	-1.0045e-07		978.256	2.23857e-06	2.52007e-06
979.22	-6.99347e-07	-1.21449e-06	-1.24371e-07		978.738	2.016e-06	2.59351e-06
979.702	-5.65575e-07	-1.02654e-06	-1.47223e-07		979.22	1.82779e-06	2.60241e-06
980.185	-4.30172e-07	-8.34038e-07	-1.68858e-07		979.702	1.68775e-06	2.51421e-06
980.667	-2.93561e-07	-6.37749e-07	-1.89151e-07		980.185	1.59665e-06	2.31279e-06
981.149	-1.56176e-07	-4.38424e-07	-2.08006e-07		980.667	1.54074e-06	2.00046e-06
981.631	-1.84548e-08	-2.36819e-07	-2.25362e-07		981.149	1.49269e-06	1.59239e-06
982.113	1.19157e-07	-3.36906e-08	-2.41199e-07		981.631	1.41685e-06	1.11318e-06
982.595	2.56211e-07	1.70193e-07	-2.55538e-07		982.113	1.27729e-06	5.92658e-07
983.077	3.92258e-07	3.74053e-07	-2.68445e-07		982.595	1.04858e-06	6.85485e-08
983.559	5.26849e-07	5.77099e-07	-2.80021e-07		983.077	7.24372e-07	-4.1819e-07
984.042	6.59535e-07	7.78537e-07	-2.90392e-07		983.559	3.20405e-07	-8.28247e-07
984.524	7.89874e-07	9.7757e-07	-2.99687e-07		984.042	-1.31291e-07	-1.13752e-06
985.006	9.17428e-07	1.17339e-06	-3.0802e-07		984.524	-5.93874e-07	-1.35157e-06
985.488	1.04177e-06	1.36519e-06	-3.15474e-07		985.006	-1.04057e-06	-1.51368e-06
985.97	1.16247e-06	1.5521e-06	-3.22085e-07		985.488	-1.46376e-06	-1.6975e-06
986.452	1.27912e-06	1.73324e-06	-3.27839e-07		985.97	-1.87605e-06	-1.98755e-06
986.934	1.39133e-06	1.90769e-06	-3.32683e-07		986.452	-2.30082e-06	-2.44364e-06
987.417	1.49872e-06	2.07454e-06	-3.36528e-07		986.934	-2.75813e-06	-3.07046e-06
987.899	1.60091e-06	2.23291e-06	-3.39275e-07		987.417	-3.25026e-06	-3.80362e-06
988.381	1.69755e-06	2.38202e-06	-3.40819e-07		987.899	-3.75722e-06	-4.52262e-06
988.863	1.78832e-06	2.52119e-06	-3.41069e-07		988.381	-4.24225e-06	-5.08806e-06
989.345	1.8729e-06	2.64989e-06	-3.39945e-07		988.863	-4.66723e-06	-5.39404e-06
989.827	1.951e-06	2.76775e-06	-3.37383e-07		989.345	-5.00867e-06	-5.40637e-06
990.309	2.02236e-06	2.87446e-06	-3.33329e-07		989.827	-5.26744e-06	-5.17763e-06
990.792	2.08674e-06	2.96981e-06	-3.27743e-07		990.309	-5.46505e-06	-4.82778e-06
991.274	2.14391e-06	3.05358e-06	-3.20592e-07		990.792	-5.63095e-06	-4.49993e-06
991.756	2.19369e-06	3.12558e-06	-3.11854e-07		991.274	-5.78577e-06	-4.30665e-06
992.238	2.2359e-06	3.18561e-06	-3.01526e-07		991.756	-5.93048e-06	-4.29469e-06
992.72	2.27042e-06	3.23346e-06	-2.89626e-07		992.238	-6.04629e-06	-4.43469e-06
993.202	2.29713e-06	3.26899e-06	-2.762e-07		992.72	-6.10561e-06	-4.64489e-06
993.684	2.31595e-06	3.29208e-06	-2.61332e-07		993.202	-6.0874e-06	-4.83062e-06
994.167	2.32682e-06	3.30273e-06	-2.45149e-07		993.684	-5.98894e-06	-4.92382e-06
994.649	2.32972e-06	3.30097e-06	-2.27818e-07		994.167	-5.82893e-06	-4.90152e-06
995.131	2.32466e-06	3.28694e-06	-2.09548e-07		994.649	-5.63998e-06	-4.78609e-06
995.613	2.31166e-06	3.26079e-06	-1.90568e-07		995.131	-5.45279e-06	-4.62123e-06
996.095	2.29079e-06	3.22276e-06	-1.71119e-07		995.613	-5.28395e-06	-4.44959e-06
996.577	2.26214e-06	3.1731e-06	-1.5143e-07		996.095	-5.12917e-06	-4.29137e-06
997.059	2.22582e-06	3.1121e-06	-1.31699e-07		996.577	-4.96634e-06	-4.14482e-06
997.541	2.18198e-06	3.04007e-06	-1.1209e-07		997.059	-4.76915e-06	-3.9924e-06
998.024	2.13079e-06	2.95735e-06	-9.2726e-08		997.541	-4.52046e-06	-3.82064e-06
998.506	2.07245e-06	2.86432e-06	-7.37012e-08		998.024	-4.22022e-06	-3.62728e-06
998.988	2.00719e-06	2.76133e-06	-5.50943e-08		998.506	-3.88859e-06	-3.42545e-06
999.47	1.93526e-06	2.64879e-06	-3.69802e-08		998.988	-3.55686e-06	-3.23316e-06
999.952	1.85693e-06	2.5271e-06	-1.94377e-08		999.47	-3.25703e-06	-3.06715e-06
1000.43	1.7725e-06	2.39672e-06	-2.54857e-09		999.952	-3.01245e-06	-2.93261e-06
1000.92	1.68229e-06	2.25818e-06	1.361e-08		1000.43	-2.83213e-06	-2.82767e-06
1001.4	1.58662e-06	2.11208e-06	2.89761e-08		1000.92	-2.70935e-06	-2.74498e-06
1001.88	1.48586e-06	1.95914e-06	4.35084e-08		1001.4	-2.62597e-06	-2.67796e-06
1002.36	1.38037e-06	1.80016e-06	5.71865e-08		1001.88	-2.55375e-06	-2.6193e-06
1002.84	1.27055e-06	1.63605e-06	7.00003e-08		1002.36	-2.45925e-06	-2.55869e-06
1003.33	1.15678e-06	1.46778e-06	8.1936e-08		1002.84	-2.30781e-06	-2.47508e-06
1003.81	1.03948e-06	1.29635e-06	9.29626e-08		1003.33	-2.07196e-06	-2.33786e-06
1004.29	9.19058e-07	1.12281e-06	1.03025e-07		1003.81	-1.73989e-06	-2.113e-06
1004.77	7.95944e-07	9.48193e-07	1.12047e-07		1004.29	-1.32396e-06	-1.77751e-06
1005.26	6.70566e-07	7.73506e-07	1.19944e-07		1004.77	-8.59994e-07	-1.33182e-06
1005.74	5.43354e-07	5.99721e-07	1.26637e-07		1005.26	-4.01227e-07	-8.08245e-07
1006.22	4.14742e-07	4.27732e-07	1.32069e-07		1005.74	8.35625e-11	-2.63844e-07
1006.7	2.85162e-07	2.58342e-07	1.3621e-07		1006.22	3.11055e-07	2.34026e-07
1007.18	1.55043e-07	9.22482e-08	1.39053e-07		1006.7	5.32445e-07	6.31329e-07
1007.67	2.48118e-08	-6.99607e-08	1.40612e-07		1007.18	7.00634e-07	9.03768e-07
1008.15	-1.05112e-07	-2.27791e-07	1.40913e-07		1007.67	8.74193e-07	1.06325e-06
1008.63	-2.34315e-07	-3.80826e-07	1.39991e-07		1008.15	1.10789e-06	1.14893e-06
1009.11	-3.62393e-07	-5.28702e-07	1.37896e-07		1008.63	1.42911e-06	1.20961e-06
1009.59	-4.88952e-07	-6.711e-07	1.34705e-07		1009.11	1.82064e-06	1.28367e-06
1010.08	-6.13606e-07	-8.07735e-07	1.30527e-07		1009.59	2.22258e-06	1.38865e-06
1010.56	-7.35985e-07	-9.38359e-07	1.25507e-07		1010.08	2.55389e-06	1.51931e-06
1011.04	-8.5573e-07	-1.06277e-06	1.19819e-07		1010.56	2.74354e-06	1.65866e-06
1011.52	-9.72499e-07	-1.18081e-06	1.1365e-07		1011.04	2.75906e-06	1.79157e-06
1012.01	-1.08596e-06	-1.29235e-06	1.07175e-07		1011.52	2.62191e-06	1.91492e-06
1012.49	-1.19581e-06	-1.39732e-06	1.00539e-07		1012.01	2.39902e-06	2.03971e-06
1012.97	-1.30174e-06	-1.49565e-06	9.38466e-08		1012.49	2.1773e-06	2.1852e-06
1013.45	-1.40349e-06	-1.5873e-06	8.71523e-08		1012.97	2.03194e-06	2.3683e-06
1013.93	-1.50078e-06	-1.67229e-06	8.04731e-08		1013.45	2.00129e-06	2.59629e-06
1014.42	-1.59339e-06	-1.75064e-06	7.37977e-08		1013.93	2.0791e-06	2.86332e-06
1014.9	-1.68108e-06	-1.82242e-06	6.70997e-08		1014.42	2.22689e-06	3.15555e-06
1015.38	-1.76366e-06	-1.88777e-06	6.0347e-08		1014.9	2.39769e-06	3.45677e-06
1015.86	-1.84095e-06	-1.94684e-06	5.35063e-08		1015.38	2.56104e-06	3.75234e-06
1016.34	-1.91278e-06	-1.99982e-06	4.65434e-08		1015.86	2.71542e-06	4.02893e-06
1016.83	-1.97901e-06	-2.04693e-06	3.94257e-08		1016.34	2.8836e-06	4.27026e-06
1017.31	-2.03952e-06	-2.0884e-06	3.21249e-08		1016.83	3.09315e-06	4.45329e-06
1017.79	-2.09421e-06	-2.12447e-06	2.4623e-08		1017.31	3.35416e-06	4.552e-06
1018.27	-2.143e-06	-2.1554e-06	1.69194e-08		1017.79	3.6455e-06	4.54273e-06
1018.76	-2.18583e-06	-2.18147e-06	9.03883e-09		1018.27	3.91481e-06	4.41599e-06
1019.24	-2.22265e-06	-2.20298e-06	1.03205e-09		1018.76	4.09504e-06	4.18459e-06
1019.72	-2.25343e-06	-2.2202e-06	-7.02593e-09		1019.24	4.12665e-06	3.88366e-06
1020.2	-2.27818e-06	-2.2334e-06	-1.50426e-08		1019.72	3.97737e-06	3.56037e-06
1020.68	-2.29691e-06	-2.24281e-06	-2.29163e-08		1020.2	3.65186e-06	3.2613e-06
1021.17	-2.30964e-06	-2.24861e-06	-3.0544e-08		1020.68	3.1877e-06	3.01721e-06
1021.65	-2.31642e-06	-2.25096e-06	-3.7826e-08		1021.17	2.64255e-06	2.83841e-06
1022.13	-2.31732e-06	-2.25001e-06	-4.46689e-08		1021.65	2.08193e-06	2.71774e-06
1022.61	-2.31241e-06	-2.24587e-06	-5.09846e-08		1022.13	1.56764e-06	2.6422e-06
1023.09	-2.30179e-06	-2.23868e-06	-5.66902e-08		1022.61	1.15192e-06	2.6015e-06
1023.58	-2.28556e-06	-2.22851e-06	-6.17075e-08		1023.09	8.74918e-07	2.59409e-06
1024.06	-2.26384e-06	-2.21541e-06	-6.5964e-08		1023.58	7.60214e-07	2.61859e-06
1024.54	-2.23677e-06	-2.19939e-06	-6.93936e-08		1024.06	8.10283e-07	2.66532e-06
1025.02	-2.2045e-06	-2.18039e-06	-7.19397e-08		1024.54	1.00313e-06	2.70794e-06
1025.51	-2.16717e-06	-2.15834e-06	-7.35564e-08		1025.02	1.29176e-06	2.70945e-06
1025.99	-2.12496e-06	-2.13318e-06	-7.42121e-08		1025.51	1.6129e-06	2.63664e-06
1026.47	-2.07802e-06	-2.10486e-06	-7.38907e-08		1025.99	1.90278e-06	2.48202e-06
1026.95	-2.02656e-06	-2.07342e-06	-7.25951e-08		1026.47	2.11444e-06	2.27516e-06
1027.43	-1.97074e-06	-2.0389e-06	-7.03479e-08		1026.95	2.23023e-06	2.08233e-06
1027.92	-1.91077e-06	-2.0014e-06	-6.71933e-08		1027.43	2.26134e-06	1.97976e-06
1028.4	-1.84683e-06	-1.96098e-06	-6.31913e-08		1027.92	2.23771e-06	2.02069e-06
1028.88	-1.77914e-06	-1.91771e-06	-5.84137e-08		1028.4	2.18929e-06	2.20403e-06
1029.36	-1.70789e-06	-1.87161e-06	-5.29344e-08		1028.88	2.13169e-06	2.46675e-06
1029.84	-1.63329e-06	-1.82271e-06	-4.68224e-08		1029.36	2.0627e-06	2.70101e-06
1030.33	-1.55555e-06	-1.77103e-06	-4.01343e-08		1029.84	1.97204e-06	2.79779e-06
1030.81	-1.47487e-06	-1.71663e-06	-3.2915e-08		1030.33	1.8551e-06	2.68787e-06
1031.29	-1.39145e-06	-1.65963e-06	-2.51986e-08		1030.81	1.72692e-06	2.3723e-06
1031.77	-1.3055e-06	-1.60016e-06	-1.70146e-08		1031.29	1.61922e-06	1.9199e-06
1032.26	-1.21722e-06	-1.53837e-06	-8.39134e-09		1031.77	1.56819e-06	1.44001e-06
1032.74	-1.12681e-06	-1.47443e-06	6.41747e-10		1032.26	1.59529e-06	1.03618e-06
1033.22	-1.03447e-06	-1.40846e-06	1.00578e-08		1032.74	1.69434e-06	7.71253e-07
1033.7	-9.40394e-07	-1.34056e-06	1.98373e-08		1033.22	1.83158e-06	6.48469e-07
1034.18	-8.44762e-07	-1.27082e-06	2.99773e-08		1033.7	1.962e-06	6.25846e-07
1034.67	-7.47762e-07	-1.19931e-06	4.04961e-08		1034.18	2.052e-06	6.42406e-07
1035.15	-6.49572e-07	-1.12613e-06	5.14359e-08		1034.67	2.09759e-06	6.51241e-07
1035.63	-5.50368e-07	-1.05135e-06	6.28572e-08		1035.15	2.12582e-06	6.32633e-07
1036.11	-4.50316e-07	-9.75037e-07	7.48307e-08		1035.63	2.17783e-06	5.93789e-07
1036.59	-3.49581e-07	-8.97229e-07	8.7424e-08		1036.11	2.28153e-06	5.47255e-07
1037.08	-2.48317e-07	-8.17912e-07	1.0069e-07		1036.59	2.43013e-06	4.9519e-07
1037.56	-1.46678e-07	-7.37029e-07	1.14655e-07		1037.08	2.5754e-06	4.1747e-07
1038.04	-4.48084e-08	-6.54482e-07	1.29311e-07		1037.56	2.64435e-06	2.84158e-07
1038.52	5.71506e-08	-5.70159e-07	1.44614e-07		1038.04	2.56958e-06	7.0861e-08
1039.01	1.59064e-07	-4.8396e-07	1.60481e-07		1038.52	2.31952e-06	-2.20311e-07
1039.49	2.60801e-07	-3.95819e-07	1.76794e-07		1039.01	1.91279e-06	-5.60348e-07
1039.97	3.62236e-07	-3.05718e-07	1.93409e-07		1039.49	1.41006e-06	-9.02579e-07
1040.45	4.63247e-07	-2.13701e-07	2.10159e-07		1039.97	8.85223e-07	-1.20628e-06
1040.93	5.63717e-07	-1.19867e-07	2.26872e-07		1040.45	3.95694e-07	-1.45095e-06
1041.42	6.63533e-07	-2.43716e-08	2.43377e-07		1040.93	-3.75483e-08	-1.64369e-06
1041.9	7.62586e-07	7.25836e-08	2.59511e-07		1041.42	-4.25925e-07	-1.80329e-06
1042.38	8.60768e-07	1.70757e-07	2.75124e-07		1041.9	-7.9436e-07	-1.94272e-06
1042.86	9.57975e-07	2.69878e-07	2.90076e-07		1042.38	-1.15573e-06	-2.05182e-06
1043.34	1.05411e-06	3.69662e-07	3.04229e-07		1042.86	-1.49609e-06	-2.10057e-06
1043.83	1.14907e-06	4.69817e-07	3.17446e-07		1043.34	-1.77878e-06	-2.054e-06
1044.31	1.24276e-06	5.7006e-07	3.29587e-07		1043.83	-1.96409e-06	-1.89887e-06
1044.79	1.33509e-06	6.7012e-07	3.40511e-07		1044.31	-2.03193e-06	-1.65854e-06
1045.27	1.42596e-06	7.69741e-07	3.50088e-07		1044.79	-1.99678e-06	-1.39322e-06
1045.76	1.51528e-06	8.68681e-07	3.58208e-07		1045.27	-1.90184e-06	-1.17792e-06
1046.24	1.60297e-06	9.66709e-07	3.64795e-07		1045.76	-1.79919e-06	-1.07416e-06
1046.72	1.68892e-06	1.0636e-06	3.69808e-07		1046.24	-1.72364e-06	-1.10264e-06
1047.2	1.77307e-06	1.15915e-06	3.73241e-07		1046.72	-1.67757e-06	-1.23977e-06
1047.68	1.85531e-06	1.25317e-06	3.75112e-07		1047.2	-1.63373e-06	-1.4309e-06
1048.17	1.93556e-06	1.34549e-06	3.7545e-07		1047.68	-1.55753e-06	-1.62077e-06
1048.65	2.01373e-06	1.43595e-06	3.74286e-07		1048.17	-1.43318e-06	-1.77801e-06
1049.13	2.08974e-06	1.52443e-06	3.71634e-07		1048.65	-1.2819e-06	-1.90595e-06
1049.61	2.1635e-06	1.61081e-06	3.67493e-07		1049.13	-1.15699e-06	-2.02932e-06
1050.09	2.23493e-06	1.69498e-06	3.61845e-07		1049.61	-1.12293e-06	-2.17178e-06
1050.58	2.30392e-06	1.77682e-06	3.54659e-07		1050.09	-1.22221e-06	-2.33314e-06
1051.06	2.37041e-06	1.85622e-06	3.45899e-07		1050.58	-1.45282e-06	-2.48506e-06
1051.54	2.4343e-06	1.9331e-06	3.35533e-07		1051.06	-1.76506e-06	-2.58425e-06
1052.02	2.4955e-06	2.00739e-06	3.23545e-07		1051.54	-2.08226e-06	-2.5994e-06
1052.51	2.55394e-06	2.07908e-06	3.09948e-07		1052.02	-2.33418e-06	-2.53234e-06
1052.99	2.60951e-06	2.14815e-06	2.94793e-07		1052.51	-2.48743e-06	-2.42362e-06
1053.47	2.66214e-06	2.21463e-06	2.78187e-07		1052.99	-2.55453e-06	-2.3357e-06
1053.95	2.71174e-06	2.27854e-06	2.60288e-07		1053.47	-2.58239e-06	-2.32399e-06
1054.43	2.75823e-06	2.33988e-06	2.41304e-07		1053.95	-2.62469e-06	-2.409e-06
1054.92	2.80152e-06	2.39862e-06	2.21486e-07		1054.43	-2.71283e-06	-2.56686e-06
1055.4	2.84154e-06	2.45474e-06	2.01099e-07		1054.92	-2.84173e-06	-2.74201e-06
1055.88	2.8782e-06	2.50822e-06	1.80409e-07		1055.4	-2.97308e-06	-2.8769e-06
1056.36	2.91143e-06	2.55907e-06	1.59655e-07		1055.88	-3.0559e-06	-2.94061e-06
1056.84	2.94116e-06	2.60732e-06	1.39033e-07		1056.36	-3.05347e-06	-2.94448e-06
1057.33	2.96732e-06	2.65306e-06	1.18692e-07		1056.84	-2.96135e-06	-2.93359e-06
1057.81	2.98983e-06	2.69643e-06	9.87257e-08		1057.33	-2.81043e-06	-2.96294e-06
1058.29	3.00864e-06	2.73755e-06	7.91802e-08		1057.81	-2.65353e-06	-3.06762e-06
1058.77	3.02368e-06	2.77656e-06	6.00579e-08		1058.29	-2.54389e-06	-3.24821e-06
1059.26	3.03492e-06	2.81357e-06	4.13268e-08		1058.77	-2.51751e-06	-3.46999e-06
1059.74	3.04228e-06	2.84869e-06	2.29276e-08		1059.26	-2.58339e-06	-3.68347e-06
1060.22	3.04574e-06	2.88196e-06	4.78356e-09		1059.74	-2.72711e-06	-3.84634e-06
1060.7	3.04526e-06	2.91338e-06	-1.31903e-08		1060.22	-2.91939e-06	-3.94027e-06
1061.18	3.04079e-06	2.9429e-06	-3.10765e-08		1060.7	-3.12459e-06	-3.96967e-06
1061.67	3.03232e-06	2.97043e-06	-4.89458e-08		1061.18	-3.30831e-06	-3.95448e-06
1062.15	3.01984e-06	2.9958e-06	-6.68518e-08		1061.67	-3.44072e-06	-3.91357e-06
1062.63	3.00332e-06	3.01882e-06	-8.48293e-08		1062.15	-3.49874e-06	-3.86072e-06
1063.11	2.98277e-06	3.03928e-06	-1.02896e-07		1062.63	-3.47282e-06	-3.80467e-06
1063.59	2.95819e-06	3.05695e-06	-1.21054e-07		1063.11	-3.36986e-06	-3.75889e-06
1064.08	2.92961e-06	3.07163e-06	-1.39291e-07		1063.59	-3.21493e-06	-3.74463e-06
1064.56	2.89704e-06	3.08311e-06	-1.57577e-07		1064.08	-3.04841e-06	-3.78858e-06
1065.04	2.86053e-06	3.09118e-06	-1.75856e-07		1064.56	-2.91399e-06	-3.90576e-06
1065.52	2.82013e-06	3.09563e-06	-1.94035e-07		1065.04	-2.84599e-06	-4.08541e-06
1066	2.77589e-06	3.09619e-06	-2.11986e-07		1065.52	-2.85955e-06	-4.28131e-06
1066.49	2.72788e-06	3.09259e-06	-2.29543e-07		1066	-2.94562e-06	-4.42439e-06
1066.97	2.67618e-06	3.08454e-06	-2.46515e-07		1066.49	-3.07706e-06	-4.44626e-06
1067.45	2.62088e-06	3.07177e-06	-2.62703e-07		1066.97	-3.22218e-06	-4.3133e-06
1067.93	2.56208e-06	3.0541e-06	-2.77913e-07		1067.45	-3.35806e-06	-4.04537e-06
1068.42	2.4999e-06	3.03139e-06	-2.91974e-07		1067.93	-3.4804e-06	-3.71507e-06
1068.9	2.43446e-06	3.00361e-06	-3.04738e-07		1068.42	-3.60049e-06	-3.41829e-06
1069.38	2.3659e-06	2.97075e-06	-3.16077e-07		1068.9	-3.73515e-06	-3.23573e-06
1069.86	2.29435e-06	2.93286e-06	-3.25878e-07		1069.38	-3.89224e-06	-3.19496e-06
1070.34	2.21998e-06	2.88995e-06	-3.34034e-07		1069.86	-4.06125e-06	-3.26067e-06
1070.83	2.14294e-06	2.84201e-06	-3.40445e-07		1070.34	-4.21228e-06	-3.34818e-06
1071.31	2.06341e-06	2.78899e-06	-3.4503e-07		1070.83	-4.30749e-06	-3.36293e-06
1071.79	1.98158e-06	2.73084e-06	-3.47736e-07		1071.31	-4.31404e-06	-3.23847e-06
1072.27	1.89762e-06	2.66749e-06	-3.48555e-07		1071.79	-4.218e-06	-2.96422e-06
1072.75	1.81175e-06	2.59894e-06	-3.47532e-07		1072.27	-4.02813e-06	-2.58157e-06
1073.24	1.72416e-06	2.52521e-06	-3.44765e-07		1072.75	-3.77063e-06	-2.16324e-06
1073.72	1.63506e-06	2.44635e-06	-3.40402e-07		1073.24	-3.47798e-06	-1.77867e-06
1074.2	1.54468e-06	2.36246e-06	-3.34622e-07		1073.72	-3.18023e-06	-1.47435e-06
1074.68	1.45323e-06	2.27363e-06	-3.27631e-07		1074.2	-2.899e-06	-1.2646e-06
1075.17	1.36094e-06	2.17994e-06	-3.19646e-07		1074.68	-2.65011e-06	-1.14589e-06
1075.65	1.26804e-06	2.08149e-06	-3.10896e-07		1075.17	-2.44797e-06	-1.10945e-06
1076.13	1.17475e-06	1.97839e-06	-3.01617e-07		1075.65	-2.30712e-06	-1.15133e-06
1076.61	1.08131e-06	1.87078e-06	-2.9205e-07		1076.13	-2.23819e-06	-1.26511e-06
1077.09	9.87961e-07	1.75884e-06	-2.82432e-07		1076.61	-2.23951e-06	-1.43119e-06
1077.58	8.94922e-07	1.64282e-06	-2.7299e-07		1077.09	-2.28911e-06	-1.60155e-06
1078.06	8.02429e-07	1.52301e-06	-2.63929e-07		1077.58	-2.34528e-06	-1.70606e-06
1078.54	7.10708e-07	1.39975e-06	-2.55423e-07		1078.06	-2.35623e-06	-1.67045e-06
1079.02	6.19984e-07	1.27336e-06	-2.47611e-07		1078.54	-2.27986e-06	-1.4481e-06
1079.5	5.30476e-07	1.14415e-06	-2.40598e-07		1079.02	-2.10283e-06	-1.04515e-06
1079.99	4.42398e-07	1.01244e-06	-2.34457e-07		1079.5	-1.84978e-06	-5.26847e-07
1080.47	3.55956e-07	8.78494e-07	-2.2923e-07		1079.99	-1.57546e-06	6.82711e-09
1080.95	2.71351e-07	7.426e-07	-2.24929e-07		1080.47	-1.34098e-06	4.58223e-07
1081.43	1.88773e-07	6.05064e-07	-2.21533e-07		1080.95	-1.18534e-06	7.73502e-07
1081.92	1.08404e-07	4.66246e-07	-2.18987e-07		1081.43	-1.10489e-06	9.58638e-07
1082.4	3.04169e-08	3.26573e-07	-2.17199e-07		1081.92	-1.05193e-06	1.06999e-06
1082.88	-4.50274e-08	1.86552e-07	-2.16047e-07		1082.4	-9.54302e-07	1.17868e-06
1083.36	-1.17779e-07	4.6751e-08	-2.15391e-07		1082.88	-7.46315e-07	1.33307e-06
1083.84	-1.87699e-07	-9.22173e-08	-2.15083e-07		1083.36	-3.98494e-07	1.53277e-06
1084.33	-2.54663e-07	-2.29724e-07	-2.14983e-07		1083.84	6.73331e-08	1.73552e-06
1084.81	-3.18558e-07	-3.65153e-07	-2.14975e-07		1084.33	5.84821e-07	1.88107e-06
1085.29	-3.79286e-07	-4.97917e-07	-2.14962e-07		1084.81	1.0674e-06	1.92925e-06
1085.77	-4.3676e-07	-6.27474e-07	-2.14879e-07		1085.29	1.44087e-06	1.87946e-06
1086.25	-4.90911e-07	-7.53327e-07	-2.14677e-07		1085.77	1.66962e-06	1.77079e-06
1086.74	-5.4168e-07	-8.75021e-07	-2.14325e-07		1086.25	1.76529e-06	1.65643e-06
1087.22	-5.89026e-07	-9.92131e-07	-2.13799e-07		1086.74	1.77914e-06	1.57544e-06
1087.7	-6.32918e-07	-1.10425e-06	-2.13084e-07		1087.22	1.77823e-06	1.53109e-06
1088.18	-6.73342e-07	-1.21099e-06	-2.12162e-07		1087.7	1.82077e-06	1.49719e-06
1088.67	-7.10296e-07	-1.31195e-06	-2.1101e-07		1088.18	1.93665e-06	1.4396e-06
1089.15	-7.43793e-07	-1.40675e-06	-2.09592e-07		1088.67	2.12148e-06	1.34937e-06
1089.63	-7.73858e-07	-1.49502e-06	-2.07853e-07		1089.15	2.34347e-06	1.25622e-06
1090.11	-8.00529e-07	-1.57642e-06	-2.05716e-07		1089.63	2.56025e-06	1.22269e-06
1090.59	-8.23856e-07	-1.65066e-06	-2.03087e-07		1090.11	2.73474e-06	1.31149e-06
1091.08	-8.43902e-07	-1.71752e-06	-1.99863e-07		1090.59	2.84738e-06	1.5503e-06
1091.56	-8.60741e-07	-1.77686e-06	-1.95946e-07		1091.08	2.8988e-06	1.90838e-06
1092.04	-8.74455e-07	-1.82863e-06	-1.91258e-07		1091.56	2.90742e-06	2.30294e-06
1092.52	-8.8514e-07	-1.87286e-06	-1.85755e-07		1092.04	2.90031e-06	2.62867e-06
1093	-8.92898e-07	-1.90961e-06	-1.79437e-07		1092.52	2.90457e-06	2.80347e-06
1093.49	-8.97842e-07	-1.93901e-06	-1.7235e-07		1093	2.93777e-06	2.79815e-06
1093.97	-9.00094e-07	-1.96116e-06	-1.64583e-07		1093.49	3.00215e-06	2.64411e-06
1094.45	-8.99782e-07	-1.97622e-06	-1.56265e-07		1093.97	3.08385e-06	2.40996e-06
1094.93	-8.97042e-07	-1.98431e-06	-1.47554e-07		1094.45	3.16027e-06	2.16447e-06
1095.42	-8.92015e-07	-1.98559e-06	-1.38625e-07		1094.93	3.20948e-06	1.94506e-06
1095.9	-8.84848e-07	-1.98022e-06	-1.2966e-07		1095.42	3.22244e-06	1.749e-06
1096.38	-8.75695e-07	-1.96843e-06	-1.20832e-07		1095.9	3.20876e-06	1.54548e-06
1096.86	-8.64709e-07	-1.95045e-06	-1.12289e-07		1096.38	3.19368e-06	1.30611e-06
1097.34	-8.52051e-07	-1.92659e-06	-1.04151e-07		1096.86	3.20561e-06	1.02688e-06
1097.83	-8.37881e-07	-1.89722e-06	-9.64969e-08		1097.34	3.25987e-06	7.35272e-07
1098.31	-8.22361e-07	-1.86275e-06	-8.93658e-08		1097.83	3.34463e-06	4.76673e-07
1098.79	-8.05653e-07	-1.82363e-06	-8.27619e-08		1098.31	3.41873e-06	2.89905e-07
1099.27	-7.87918e-07	-1.78037e-06	-7.66622e-08		1098.79	3.42265e-06	1.83681e-07
1099.75	-7.69316e-07	-1.73353e-06	-7.1024e-08		1099.27	3.30039e-06	1.34391e-07
1100.24	-7.50002e-07	-1.68367e-06	-6.57924e-08		1099.75	3.02345e-06	9.68484e-08
1100.72	-7.30128e-07	-1.63137e-06	-6.09042e-08		1100.24	2.6062e-06	2.93877e-08
1101.2	-7.09842e-07	-1.57719e-06	-5.62893e-08		1100.72	2.10678e-06	-8.70366e-08
1101.68	-6.89286e-07	-1.52167e-06	-5.18728e-08		1101.2	1.60924e-06	-2.42355e-07
1102.17	-6.68593e-07	-1.46531e-06	-4.75788e-08		1101.68	1.19438e-06	-4.09322e-07
1102.65	-6.47891e-07	-1.40858e-06	-4.33344e-08		1102.17	9.14684e-07	-5.59307e-07
1103.13	-6.273e-07	-1.35187e-06	-3.90751e-08		1102.65	7.80373e-07	-6.77209e-07
1103.61	-6.0693e-07	-1.29557e-06	-3.47448e-08		1103.13	7.63207e-07	-7.59829e-07
1104.09	-5.86883e-07	-1.24e-06	-3.02941e-08		1103.61	8.1356e-07	-8.06678e-07
1104.58	-5.67252e-07	-1.18548e-06	-2.56728e-08		1104.09	8.79383e-07	-8.04836e-07
1105.06	-5.48119e-07	-1.13227e-06	-2.0824e-08		1104.58	9.18064e-07	-7.28111e-07
1105.54	-5.29558e-07	-1.08064e-06	-1.56789e-08		1105.06	9.01088e-07	-5.47166e-07
1106.02	-5.11631e-07	-1.03081e-06	-1.01634e-08		1105.54	8.08272e-07	-2.53655e-07
1106.5	-4.94392e-07	-9.82982e-07	-4.20998e-09		1106.02	6.24413e-07	1.20522e-07
1106.99	-4.77882e-07	-9.37348e-07	2.2229e-09		1106.5	3.41987e-07	4.98579e-07
1107.47	-4.62133e-07	-8.94056e-07	9.13305e-09		1106.99	-2.95441e-08	7.80643e-07
1107.95	-4.47168e-07	-8.53219e-07	1.64642e-08		1107.47	-4.55037e-07	8.78923e-07
1108.43	-4.32996e-07	-8.14916e-07	2.4108e-08		1107.95	-8.7114e-07	7.58946e-07
1108.92	-4.19621e-07	-7.79185e-07	3.1917e-08		1108.43	-1.19991e-06	4.5669e-07
1109.4	-4.07033e-07	-7.46035e-07	3.97272e-08		1108.92	-1.37049e-06	7.04659e-08
1109.88	-3.95215e-07	-7.15455e-07	4.73775e-08		1109.4	-1.3445e-06	-2.76951e-07
1110.36	-3.84142e-07	-6.87429e-07	5.47246e-08		1109.88	-1.13223e-06	-4.83708e-07
1110.84	-3.73777e-07	-6.61942e-07	6.16461e-08		1110.36	-7.91899e-07	-5.07431e-07
1111.33	-3.64079e-07	-6.38982e-07	6.80354e-08		1110.84	-4.09158e-07	-3.73714e-07
1111.81	-3.54996e-07	-6.18538e-07	7.37931e-08		1111.33	-6.81817e-08	-1.5999e-07
1112.29	-3.46472e-07	-6.00587e-07	7.88222e-08		1111.81	1.76806e-07	4.24626e-08
1112.77	-3.38443e-07	-5.85083e-07	8.30284e-08		1112.29	3.12714e-07	1.61578e-07
1113.25	-3.30842e-07	-5.71942e-07	8.63305e-08		1112.77	3.61495e-07	1.67966e-07
1113.74	-3.23596e-07	-5.6104e-07	8.86739e-08		1113.25	3.60467e-07	7.11141e-08
1114.22	-3.16627e-07	-5.52213e-07	9.00417e-08		1113.74	3.4243e-07	-9.425e-08
1114.7	-3.09856e-07	-5.45264e-07	9.04582e-08		1114.22	3.25466e-07	-2.87638e-07
1115.18	-3.03201e-07	-5.39963e-07	8.99847e-08		1114.7	3.17146e-07	-4.71015e-07
1115.67	-2.96578e-07	-5.36054e-07	8.8707e-08		1115.18	3.26077e-07	-6.09519e-07
1116.15	-2.89905e-07	-5.33249e-07	8.6722e-08		1115.67	3.73377e-07	-6.64264e-07
1116.63	-2.83096e-07	-5.31225e-07	8.41264e-08		1116.15	4.90698e-07	-5.94168e-07
1117.11	-2.7607e-07	-5.29625e-07	8.1013e-08		1116.63	7.05629e-07	-3.67648e-07
1117.59	-2.68744e-07	-5.28064e-07	7.74708e-08		1117.11	1.02056e-06	1.63997e-08
1118.08	-2.6104e-07	-5.26148e-07	7.35888e-08		1117.59	1.39779e-06	5.13516e-07
1118.56	-2.52882e-07	-5.23496e-07	6.94572e-08		1118.08	1.76118e-06	1.03175e-06
1119.04	-2.44196e-07	-5.19767e-07	6.51659e-08		1118.56	2.0191e-06	1.45606e-06
1119.52	-2.34913e-07	-5.14675e-07	6.07991e-08		1119.04	2.0985e-06	1.68779e-06
1120	-2.24969e-07	-5.08002e-07	5.64291e-08		1119.52	1.97645e-06	1.68466e-06
1120.49	-2.14302e-07	-4.99595e-07	5.21119e-08		1120	1.69377e-06	1.48168e-06
1120.97	-2.02857e-07	-4.89351e-07	4.78867e-08		1120.49	1.34299e-06	1.18284e-06
1121.45	-1.90582e-07	-4.77204e-07	4.37777e-08		1120.97	1.03287e-06	9.19813e-07
1121.93	-1.77432e-07	-4.63107e-07	3.97995e-08		1121.45	8.47725e-07	8.02458e-07
1122.41	-1.63366e-07	-4.47017e-07	3.59594e-08		1121.93	8.17356e-07	8.74549e-07
1122.9	-1.4835e-07	-4.2889e-07	3.22561e-08		1122.41	9.10098e-07	1.10101e-06
1123.38	-1.32355e-07	-4.08673e-07	2.8676e-08		1122.9	1.05152e-06	1.38735e-06
1123.86	-1.15356e-07	-3.86303e-07	2.51883e-08		1123.38	1.15847e-06	1.62446e-06
1124.34	-9.73371e-08	-3.61705e-07	2.17406e-08		1123.86	1.17042e-06	1.73079e-06
1124.83	-7.82851e-08	-3.34798e-07	1.82645e-08		1124.34	1.06794e-06	1.68161e-06
1125.31	-5.81939e-08	-3.05502e-07	1.46854e-08		1124.83	8.71098e-07	1.50397e-06
1125.79	-3.70628e-08	-2.73752e-07	1.0938e-08		1125.31	6.2438e-07	1.25537e-06
1126.27	-1.48963e-08	-2.39517e-07	6.98206e-09		1125.79	3.76253e-07	9.92099e-07
1126.75	8.29538e-09	-2.02818e-07	2.81126e-09		1126.27	1.64835e-07	7.49275e-07
1127.24	3.24964e-08	-1.63735e-07	-1.54673e-09		1126.75	1.12564e-08	5.35591e-07
1127.72	5.76856e-08	-1.22406e-07	-6.03977e-09		1127.24	-7.76457e-08	3.46166e-07
1128.2	8.3836e-08	-7.90182e-08	-1.06083e-08		1127.72	-1.05418e-07	1.75766e-07
1128.68	1.10916e-07	-3.37902e-08	-1.52027e-08		1128.2	-8.15483e-08	3.01992e-08
1129.16	1.38887e-07	1.30401e-08	-1.9798e-08		1128.68	-2.31657e-08	-7.72211e-08
1129.65	1.67706e-07	6.12242e-08	-2.44017e-08		1129.16	4.65192e-08	-1.35578e-07
1130.13	1.97327e-07	1.10504e-07	-2.90516e-08		1129.65	1.00432e-07	-1.5064e-07
1130.61	2.27696e-07	1.60609e-07	-3.38082e-08		1130.13	1.14457e-07	-1.47006e-07
1131.09	2.58755e-07	2.11254e-07	-3.87443e-08		1130.61	7.44927e-08	-1.6187e-07
1131.58	2.90443e-07	2.62144e-07	-4.39321e-08		1131.09	-1.84772e-08	-2.28798e-07
1132.06	3.22693e-07	3.12979e-07	-4.94357e-08		1131.58	-1.51151e-07	-3.64002e-07
1132.54	3.55434e-07	3.63475e-07	-5.53037e-08		1132.06	-3.04942e-07	-5.60189e-07
1133.02	3.88591e-07	4.13364e-07	-6.1568e-08		1132.54	-4.67477e-07	-7.92794e-07
1133.5	4.22088e-07	4.62405e-07	-6.82389e-08		1133.02	-6.38083e-07	-1.02951e-06
1133.99	4.55841e-07	5.1037e-07	-7.53038e-08		1133.5	-8.26825e-07	-1.24441e-06
1134.47	4.89769e-07	5.5703e-07	-8.27205e-08		1133.99	-1.04103e-06	-1.42121e-06
1134.95	5.23783e-07	6.02147e-07	-9.04167e-08		1134.47	-1.27222e-06	-1.55175e-06
1135.43	5.57798e-07	6.45466e-07	-9.82884e-08		1134.95	-1.48911e-06	-1.62804e-06
1135.91	5.91723e-07	6.86734e-07	-1.06209e-07		1135.43	-1.64401e-06	-1.63898e-06
1136.4	6.25471e-07	7.25717e-07	-1.14038e-07		1135.91	-1.68989e-06	-1.57359e-06
1136.88	6.58951e-07	7.6223e-07	-1.21645e-07		1136.4	-1.60419e-06	-1.4331e-06
1137.36	6.92074e-07	7.96152e-07	-1.28921e-07		1136.88	-1.402e-06	-1.23784e-06
1137.84	7.24755e-07	8.27429e-07	-1.35799e-07		1137.36	-1.1366e-06	-1.03053e-06
1138.33	7.56905e-07	8.56062e-07	-1.42256e-07		1137.84	-8.81182e-07	-8.64332e-07
1138.81	7.88441e-07	8.82082e-07	-1.48311e-07		1138.33	-7.01845e-07	-7.81965e-07
1139.29	8.1928e-07	9.05527e-07	-1.54009e-07		1138.81	-6.32415e-07	-7.97321e-07
1139.77	8.49342e-07	9.26424e-07	-1.59402e-07		1139.29	-6.65771e-07	-8.8871e-07
1140.25	8.78548e-07	9.44788e-07	-1.64524e-07		1139.77	-7.62039e-07	-1.00602e-06
1140.74	9.06824e-07	9.60629e-07	-1.69378e-07		1140.25	-8.71307e-07	-1.09549e-06
1141.22	9.34095e-07	9.73968e-07	-1.7392e-07		1140.74	-9.5611e-07	-1.12231e-06
1141.7	9.60292e-07	9.84844e-07	-1.7807e-07		1141.22	-1.0052e-06	-1.08451e-06
1142.18	9.85347e-07	9.93324e-07	-1.81714e-07		1141.7	-1.03145e-06	-1.01042e-06
1142.66	1.00919e-06	9.99491e-07	-1.84728e-07		1142.18	-1.05847e-06	-9.405e-07
1143.15	1.03177e-06	1.00343e-06	-1.86991e-07		1142.66	-1.10288e-06	-9.0329e-07
1143.63	1.05301e-06	1.00525e-06	-1.884e-07		1143.15	-1.16664e-06	-9.01298e-07
1144.11	1.07287e-06	1.00501e-06	-1.88882e-07		1143.63	-1.23826e-06	-9.1155e-07
1144.59	1.09127e-06	1.00281e-06	-1.88396e-07		1144.11	-1.30658e-06	-9.02861e-07
1145.08	1.10818e-06	9.98718e-07	-1.86934e-07		1144.59	-1.3713e-06	-8.57784e-07
1145.56	1.12353e-06	9.92821e-07	-1.84511e-07		1145.08	-1.44697e-06	-7.90006e-07
1146.04	1.13728e-06	9.85202e-07	-1.81165e-07		1145.56	-1.55155e-06	-7.42373e-07
1146.52	1.14938e-06	9.75941e-07	-1.76946e-07		1146.04	-1.69048e-06	-7.70716e-07
1147	1.15979e-06	9.6512e-07	-1.71912e-07		1146.52	-1.84166e-06	-9.16743e-07
1147.49	1.16844e-06	9.52818e-07	-1.66126e-07		1147	-1.95564e-06	-1.18514e-06
1147.97	1.17531e-06	9.39121e-07	-1.59647e-07		1147.49	-1.97184e-06	-1.53611e-06
1148.45	1.18035e-06	9.2413e-07	-1.52536e-07		1147.97	-1.84804e-06	-1.89683e-06
1148.93	1.18353e-06	9.07965e-07	-1.44848e-07		1148.45	-1.58313e-06	-2.18527e-06
1149.41	1.18479e-06	8.90763e-07	-1.36632e-07		1148.93	-1.22587e-06	-2.33937e-06
1149.9	1.18411e-06	8.72673e-07	-1.27931e-07		1149.41	-8.60274e-07	-2.33409e-06
1150.38	1.18144e-06	8.53842e-07	-1.1878e-07		1149.9	-5.74041e-07	-2.18682e-06
1150.86	1.17676e-06	8.34404e-07	-1.09202e-07		1150.38	-4.26124e-07	-1.9449e-06
1151.34	1.17002e-06	8.14472e-07	-9.92096e-08		1150.86	-4.24754e-07	-1.66879e-06
1151.83	1.16121e-06	7.94134e-07	-8.88055e-08		1151.34	-5.26717e-07	-1.41216e-06
1152.31	1.15029e-06	7.73458e-07	-7.79881e-08		1151.83	-6.59266e-07	-1.21058e-06
1152.79	1.13724e-06	7.52492e-07	-6.6758e-08		1152.31	-7.52049e-07	-1.07688e-06
1153.27	1.12202e-06	7.31267e-07	-5.5128e-08		1152.79	-7.65917e-07	-1.0043e-06
1153.75	1.10463e-06	7.09791e-07	-4.31295e-08		1153.27	-7.02996e-07	-9.69435e-07
1154.24	1.08503e-06	6.88045e-07	-3.08178e-08		1153.75	-5.96225e-07	-9.43282e-07
1154.72	1.06322e-06	6.65981e-07	-1.82709e-08		1154.24	-4.86267e-07	-8.94748e-07
1155.2	1.03918e-06	6.43525e-07	-5.58527e-09		1154.72	-3.99446e-07	-8.02426e-07
1155.68	1.01291e-06	6.20592e-07	7.13435e-09		1155.2	-3.38073e-07	-6.61866e-07
1156.16	9.84402e-07	5.97102e-07	1.97838e-08		1155.68	-2.87643e-07	-4.92189e-07
1156.65	9.53657e-07	5.72992e-07	3.22682e-08		1156.16	-2.32493e-07	-3.32782e-07
1157.13	9.20683e-07	5.4823e-07	4.45056e-08		1156.65	-1.72767e-07	-2.33834e-07
1157.61	8.85493e-07	5.22805e-07	5.64271e-08		1157.13	-1.28302e-07	-2.36642e-07
1158.09	8.48105e-07	4.96721e-07	6.7971e-08		1157.61	-1.29909e-07	-3.56662e-07
1158.58	8.08542e-07	4.69975e-07	7.90783e-08		1158.09	-2.00247e-07	-5.71708e-07
1159.06	7.66837e-07	4.42549e-07	8.96864e-08		1158.58	-3.35676e-07	-8.28132e-07
1159.54	7.23027e-07	4.14405e-07	9.97277e-08		1159.06	-5.0064e-07	-1.05673e-06
1160.02	6.77154e-07	3.85489e-07	1.09129e-07		1159.54	-6.39177e-07	-1.19841e-06
1160.5	6.29271e-07	3.55741e-07	1.17815e-07		1160.02	-6.97881e-07	-1.22631e-06
1160.99	5.79436e-07	3.25115e-07	1.25713e-07		1160.5	-6.5042e-07	-1.15486e-06
1161.47	5.27712e-07	2.93584e-07	1.3276e-07		1160.99	-5.09971e-07	-1.03153e-06
1161.95	4.74171e-07	2.61149e-07	1.38908e-07		1161.47	-3.2566e-07	-9.1911e-07
1162.43	4.1889e-07	2.27838e-07	1.44131e-07		1161.95	-1.61079e-07	-8.69199e-07
1162.91	3.61955e-07	1.93703e-07	1.48431e-07		1162.43	-6.94695e-08	-9.07426e-07
1163.4	3.03454e-07	1.58805e-07	1.51835e-07		1162.91	-7.25385e-08	-1.0269e-06
1163.88	2.43483e-07	1.2321e-07	1.54402e-07		1163.4	-1.54862e-07	-1.1963e-06
1164.36	1.82144e-07	8.69694e-08	1.56206e-07		1163.88	-2.74407e-07	-1.37472e-06
1164.84	1.19542e-07	5.01066e-08	1.57337e-07		1164.36	-3.84789e-07	-1.52841e-06
1165.33	5.5788e-08	1.26059e-08	1.57879e-07		1164.84	-4.52997e-07	-1.63561e-06
1165.81	-9.00283e-09	-2.55942e-08	1.57902e-07		1165.33	-4.70805e-07	-1.68866e-06
1166.29	-7.47123e-08	-6.45939e-08	1.57446e-07		1165.81	-4.50654e-07	-1.68289e-06
1166.77	-1.41219e-07	-1.04511e-07	1.56521e-07		1166.29	-4.13886e-07	-1.61289e-06
1167.25	-2.08398e-07	-1.45448e-07	1.55099e-07		1166.77	-3.77096e-07	-1.47255e-06
1167.74	-2.76124e-07	-1.87459e-07	1.53129e-07		1167.25	-3.45214e-07	-1.26188e-06
1168.22	-3.44268e-07	-2.30518e-07	1.50543e-07		1167.74	-3.10665e-07	-9.9286e-07
1168.7	-4.12699e-07	-2.74515e-07	1.47274e-07		1168.22	-2.60078e-07	-6.92092e-07
1169.18	-4.81288e-07	-3.19258e-07	1.4327e-07		1168.7	-1.83423e-07	-3.92837e-07
1169.66	-5.49903e-07	-3.64511e-07	1.38502e-07		1169.18	-8.03776e-08	-1.23868e-07
1170.15	-6.18411e-07	-4.10023e-07	1.32976e-07		1169.66	4.03093e-08	1.02816e-07
1170.63	-6.86681e-07	-4.5557e-07	1.26726e-07		1170.15	1.63669e-07	2.94594e-07
1171.11	-7.54582e-07	-5.00973e-07	1.19814e-07		1170.63	2.75195e-07	4.74337e-07
1171.59	-8.21983e-07	-5.46101e-07	1.12316e-07		1171.11	3.65903e-07	6.6662e-07
1172.08	-8.88756e-07	-5.90859e-07	1.04318e-07		1171.59	4.3331e-07	8.84111e-07
1172.56	-9.54774e-07	-6.35168e-07	9.58978e-08		1172.08	4.79661e-07	1.12118e-06
1173.04	-1.01991e-06	-6.78939e-07	8.71248e-08		1172.56	5.1133e-07	1.35876e-06
1173.52	-1.08405e-06	-7.22063e-07	7.80575e-08		1173.04	5.36172e-07	1.57456e-06
1174	-1.14706e-06	-7.64404e-07	6.87504e-08		1173.52	5.64448e-07	1.76007e-06
1174.49	-1.20885e-06	-8.05807e-07	5.92596e-08		1174	6.08079e-07	1.92451e-06
1174.97	-1.26928e-06	-8.46104e-07	4.96538e-08		1174.49	6.7993e-07	2.09203e-06
1175.45	-1.32827e-06	-8.8512e-07	4.00164e-08		1174.97	7.89313e-07	2.28698e-06
1175.93	-1.38571e-06	-9.22679e-07	3.04471e-08		1175.45	9.39138e-07	2.51871e-06
1176.41	-1.4415e-06	-9.58606e-07	2.1053e-08		1175.93	1.12442e-06	2.77061e-06
1176.9	-1.49557e-06	-9.92727e-07	1.19408e-08		1176.41	1.33214e-06	3.00447e-06
1177.38	-1.54782e-06	-1.02487e-06	3.20538e-09		1176.9	1.54442e-06	3.17334e-06
1177.86	-1.59819e-06	-1.0549e-06	-5.0759e-09		1177.38	1.74291e-06	3.24143e-06
1178.34	-1.64663e-06	-1.08266e-06	-1.28441e-08		1177.86	1.91119e-06	3.19845e-06
1178.82	-1.69306e-06	-1.10805e-06	-2.00533e-08		1178.34	2.03583e-06	3.06345e-06
1179.31	-1.73745e-06	-1.13102e-06	-2.66647e-08		1178.82	2.10708e-06	2.87712e-06
1179.79	-1.77977e-06	-1.15151e-06	-3.26386e-08		1179.31	2.11719e-06	2.68435e-06
1180.27	-1.81999e-06	-1.1695e-06	-3.7934e-08		1179.79	2.06292e-06	2.51868e-06
1180.75	-1.85809e-06	-1.18499e-06	-4.25099e-08		1180.27	1.95037e-06	2.39571e-06
1181.24	-1.89407e-06	-1.19799e-06	-4.63339e-08		1180.75	1.79912e-06	2.31419e-06
1181.72	-1.92794e-06	-1.2085e-06	-4.93905e-08		1181.24	1.64338e-06	2.26641e-06
1182.2	-1.95971e-06	-1.21653e-06	-5.16872e-08		1181.72	1.52643e-06	2.24772e-06
1182.68	-1.98941e-06	-1.22211e-06	-5.3255e-08		1182.2	1.48846e-06	2.26019e-06
1183.16	-2.01707e-06	-1.22527e-06	-5.41447e-08		1182.68	1.54998e-06	2.30878e-06
1183.65	-2.04273e-06	-1.22605e-06	-5.44169e-08		1183.16	1.70138e-06	2.39554e-06
1184.13	-2.06645e-06	-1.2245e-06	-5.41321e-08		1183.65	1.89987e-06	2.51034e-06
1184.61	-2.08829e-06	-1.22067e-06	-5.3343e-08		1184.13	2.08013e-06	2.63266e-06
1185.09	-2.10831e-06	-1.21462e-06	-5.20914e-08		1184.61	2.17401e-06	2.73662e-06
1185.57	-2.12659e-06	-1.20642e-06	-5.04106e-08		1185.09	2.13519e-06	2.80184e-06
1186.06	-2.14321e-06	-1.19614e-06	-4.83327e-08		1185.57	1.95295e-06	2.81964e-06
1186.54	-2.15825e-06	-1.18389e-06	-4.58979e-08		1186.06	1.65889e-06	2.79719e-06
1187.02	-2.17181e-06	-1.1698e-06	-4.31629e-08		1186.54	1.31455e-06	2.75157e-06
1187.5	-2.18399e-06	-1.15403e-06	-4.02063e-08		1187.02	9.91423e-07	2.70323e-06
1187.99	-2.19487e-06	-1.13677e-06	-3.71278e-08		1187.5	7.4951e-07	2.66759e-06
1188.47	-2.20456e-06	-1.11823e-06	-3.40429e-08		1187.99	6.21514e-07	2.65334e-06
1188.95	-2.21315e-06	-1.09864e-06	-3.10729e-08		1188.47	6.0749e-07	2.66275e-06
1189.43	-2.22076e-06	-1.0782e-06	-2.83302e-08		1188.95	6.8224e-07	2.69564e-06
1189.91	-2.22746e-06	-1.05712e-06	-2.59049e-08		1189.43	8.04977e-07	2.75022e-06
1190.4	-2.23337e-06	-1.03559e-06	-2.38529e-08		1189.91	9.3272e-07	2.82195e-06
1190.88	-2.23858e-06	-1.01377e-06	-2.21894e-08		1190.4	1.03027e-06	2.89821e-06
1191.36	-2.24316e-06	-9.91847e-07	-2.08891e-08		1190.88	1.07437e-06	2.95786e-06
1191.84	-2.24721e-06	-9.6998e-07	-1.98948e-08		1191.36	1.05718e-06	2.97315e-06
1192.32	-2.25081e-06	-9.48352e-07	-1.91322e-08		1191.84	9.84347e-07	2.91904e-06
1192.81	-2.25402e-06	-9.27158e-07	-1.85262e-08		1192.32	8.72791e-07	2.78273e-06
1193.29	-2.25691e-06	-9.06602e-07	-1.80167e-08		1192.81	7.4636e-07	2.57067e-06
1193.77	-2.25952e-06	-8.8689e-07	-1.75684e-08		1193.29	6.30231e-07	2.30627e-06
1194.25	-2.26191e-06	-8.68218e-07	-1.71712e-08		1193.77	5.44176e-07	2.02221e-06
1194.74	-2.2641e-06	-8.50763e-07	-1.6835e-08		1194.25	4.96733e-07	1.74593e-06
1195.22	-2.26611e-06	-8.34676e-07	-1.65792e-08		1194.74	4.81512e-07	1.49169e-06
1195.7	-2.26795e-06	-8.20081e-07	-1.64217e-08		1195.22	4.79805e-07	1.25607e-06
1196.18	-2.26962e-06	-8.07077e-07	-1.63707e-08		1195.7	4.69256e-07	1.02732e-06
1196.66	-2.2711e-06	-7.95742e-07	-1.64241e-08		1196.18	4.34771e-07	7.973e-07
1197.15	-2.27235e-06	-7.86136e-07	-1.65728e-08		1196.66	3.77782e-07	5.74998e-07
1197.63	-2.27335e-06	-7.78303e-07	-1.68102e-08		1197.15	3.17799e-07	3.86148e-07
1198.11	-2.27403e-06	-7.72265e-07	-1.7139e-08		1197.63	2.8544e-07	2.67235e-07
1198.59	-2.27432e-06	-7.68019e-07	-1.75764e-08		1198.11	3.08512e-07	2.47203e-07
1199.07	-2.27414e-06	-7.65535e-07	-1.81514e-08		1198.59	3.99402e-07	3.33828e-07
1199.56	-2.2734e-06	-7.64755e-07	-1.88981e-08		1199.07	5.46958e-07	5.0716e-07
1200.04	-2.272e-06	-7.65597e-07	-1.98448e-08		1199.56	7.17707e-07	7.28579e-07
1200.52	-2.26982e-06	-7.67959e-07	-2.10034e-08		1200.04	8.67779e-07	9.54646e-07
1201	-2.26674e-06	-7.71727e-07	-2.23623e-08		1200.52	9.57417e-07	1.15676e-06
1201.49	-2.26261e-06	-7.76774e-07	-2.38868e-08		1201	9.64834e-07	1.32879e-06
1201.97	-2.2573e-06	-7.82959e-07	-2.5523e-08		1201.49	8.92635e-07	1.48323e-06
1202.45	-2.25065e-06	-7.9012e-07	-2.72096e-08		1201.97	7.64481e-07	1.63676e-06
1202.93	-2.2425e-06	-7.98072e-07	-2.88885e-08		1202.45	6.15355e-07	1.79614e-06
1203.41	-2.23269e-06	-8.06603e-07	-3.05149e-08		1202.93	4.80137e-07	1.94939e-06
1203.9	-2.22103e-06	-8.15475e-07	-3.20627e-08		1203.41	3.8606e-07	2.07175e-06
1204.38	-2.20736e-06	-8.24435e-07	-3.35253e-08		1203.9	3.48149e-07	2.13779e-06
1204.86	-2.1915e-06	-8.3323e-07	-3.49123e-08		1204.38	3.70297e-07	2.13802e-06
1205.34	-2.17325e-06	-8.41614e-07	-3.62419e-08		1204.86	4.47666e-07	2.08715e-06
1205.82	-2.15243e-06	-8.49362e-07	-3.75346e-08		1205.34	5.6903e-07	2.02178e-06
1206.31	-2.12887e-06	-8.56272e-07	-3.8806e-08		1205.82	7.1738e-07	1.98473e-06
1206.79	-2.10237e-06	-8.62161e-07	-4.00614e-08		1206.31	8.71699e-07	2.00841e-06
1207.27	-2.07275e-06	-8.66858e-07	-4.12936e-08		1206.79	1.00754e-06	2.09929e-06
1207.75	-2.03983e-06	-8.70198e-07	-4.24808e-08		1207.27	1.10353e-06	2.24014e-06
1208.24	-2.00345e-06	-8.72011e-07	-4.35869e-08		1207.75	1.14763e-06	2.39918e-06
1208.72	-1.96343e-06	-8.72129e-07	-4.456e-08		1208.24	1.14248e-06	2.5495e-06
1209.2	-1.91961e-06	-8.70378e-07	-4.5334e-08		1208.72	1.10711e-06	2.68048e-06
1209.68	-1.87184e-06	-8.66593e-07	-4.58298e-08		1209.2	1.06937e-06	2.80197e-06
1210.16	-1.81998e-06	-8.60617e-07	-4.59611e-08		1209.68	1.05536e-06	2.93423e-06
1210.65	-1.76391e-06	-8.52306e-07	-4.56415e-08		1210.16	1.07976e-06	3.09417e-06
1211.13	-1.70349e-06	-8.41535e-07	-4.47945e-08		1210.65	1.13822e-06	3.28073e-06
1211.61	-1.63863e-06	-8.28189e-07	-4.33624e-08		1211.13	1.21023e-06	3.4751e-06
1212.09	-1.56923e-06	-8.12165e-07	-4.13158e-08		1211.61	1.26894e-06	3.6457e-06
1212.57	-1.49524e-06	-7.93367e-07	-3.86536e-08		1212.09	1.29292e-06	3.76479e-06
1213.06	-1.41658e-06	-7.71702e-07	-3.54021e-08		1212.57	1.27684e-06	3.81939e-06
1213.54	-1.33324e-06	-7.47082e-07	-3.16034e-08		1213.06	1.23494e-06	3.81557e-06
1214.02	-1.24518e-06	-7.19428e-07	-2.7303e-08		1213.54	1.19419e-06	3.76967e-06
1214.5	-1.15242e-06	-6.88669e-07	-2.25367e-08		1214.02	1.18283e-06	3.69898e-06
1214.99	-1.05499e-06	-6.54753e-07	-1.73232e-08		1214.5	1.21691e-06	3.60769e-06
1215.47	-9.52918e-07	-6.17646e-07	-1.16613e-08		1214.99	1.29494e-06	3.48697e-06
1215.95	-8.46288e-07	-5.77337e-07	-5.5369e-09		1215.47	1.39633e-06	3.31874e-06
1216.43	-7.3519e-07	-5.33847e-07	1.06709e-09		1215.95	1.48934e-06	3.08862e-06
1216.91	-6.19738e-07	-4.87222e-07	8.15861e-09		1216.43	1.5419e-06	2.79423e-06
1217.4	-5.00071e-07	-4.37541e-07	1.57278e-08		1216.91	1.52966e-06	2.45036e-06
1217.88	-3.76348e-07	-3.8491e-07	2.37429e-08		1217.4	1.44197e-06	2.08265e-06
1218.36	-2.48753e-07	-3.29458e-07	3.2154e-08		1217.88	1.28274e-06	1.71989e-06
1218.84	-1.17488e-07	-2.71331e-07	4.08993e-08		1218.36	1.06666e-06	1.38499e-06
1219.32	1.72218e-08	-2.10677e-07	4.99134e-08		1218.84	8.16643e-07	1.092e-06
1219.81	1.5513e-07	-1.47642e-07	5.91329e-08		1219.32	5.60333e-07	8.47124e-07
1220.29	2.95971e-07	-8.23569e-08	6.84993e-08		1219.81	3.25503e-07	6.52113e-07
1220.77	4.39461e-07	-1.49399e-08	7.7956e-08		1220.29	1.37677e-07	5.05735e-07
1221.25	5.85297e-07	5.45016e-08	8.74478e-08		1220.77	1.37667e-08	4.02265e-07
1221.74	7.33159e-07	1.2586e-07	9.6916e-08		1221.25	-4.27317e-08	3.26136e-07
1222.22	8.82709e-07	1.99013e-07	1.063e-07		1221.74	-4.41357e-08	2.50733e-07
1222.7	1.0336e-06	2.73811e-07	1.15543e-07		1222.22	-1.77052e-08	1.42404e-07
1223.18	1.18545e-06	3.50073e-07	1.24592e-07		1222.7	6.14362e-10	-2.88739e-08
1223.66	1.3379e-06	4.27576e-07	1.33412e-07		1223.18	-2.39742e-08	-2.77942e-07
1224.15	1.49056e-06	5.06069e-07	1.41978e-07		1223.66	-1.15438e-07	-5.94379e-07
1224.63	1.64301e-06	5.85273e-07	1.50286e-07		1224.15	-2.80397e-07	-9.47203e-07
1225.11	1.79486e-06	6.64896e-07	1.5834e-07		1224.63	-5.06369e-07	-1.29461e-06
1225.59	1.94568e-06	7.44629e-07	1.66152e-07		1225.11	-7.65246e-07	-1.60296e-06
1226.07	2.09506e-06	8.24157e-07	1.73737e-07		1225.59	-1.02137e-06	-1.86088e-06
1226.56	2.24258e-06	9.03151e-07	1.81113e-07		1226.07	-1.2414e-06	-2.08415e-06
1227.04	2.3878e-06	9.81273e-07	1.88295e-07		1226.56	-1.40024e-06	-2.30566e-06
1227.52	2.53031e-06	1.05817e-06	1.953e-07		1227.04	-1.487e-06	-2.56051e-06
1228	2.66969e-06	1.1335e-06	2.02146e-07		1227.52	-1.50606e-06	-2.86799e-06
1228.49	2.80551e-06	1.2069e-06	2.08845e-07		1228	-1.47518e-06	-3.22586e-06
1228.97	2.93736e-06	1.27806e-06	2.15402e-07		1228.49	-1.42344e-06	-3.61273e-06
1229.45	3.06485e-06	1.34667e-06	2.21811e-07		1228.97	-1.3851e-06	-4.00157e-06
1229.93	3.18758e-06	1.41247e-06	2.28053e-07		1229.45	-1.3914e-06	-4.37205e-06
1230.41	3.30518e-06	1.47523e-06	2.34097e-07		1229.93	-1.46355e-06	-4.71783e-06
1230.9	3.41726e-06	1.53475e-06	2.39905e-07		1230.41	-1.6046e-06	-5.04311e-06
1231.38	3.5235e-06	1.59084e-06	2.45433e-07		1230.9	-1.79844e-06	-5.35318e-06
1231.86	3.62354e-06	1.64333e-06	2.50639e-07		1231.38	-2.0144e-06	-5.64106e-06
1232.34	3.71709e-06	1.69205e-06	2.55481e-07		1231.86	-2.21671e-06	-5.88487e-06
1232.82	3.80383e-06	1.7368e-06	2.59917e-07		1232.34	-2.37761e-06	-6.0531e-06
1233.31	3.88352e-06	1.77741e-06	2.63896e-07		1232.82	-2.48614e-06	-6.11954e-06
1233.79	3.95588e-06	1.81374e-06	2.67363e-07		1233.31	-2.54899e-06	-6.07869e-06
1234.27	4.0207e-06	1.84566e-06	2.70252e-07		1233.79	-2.58464e-06	-5.95345e-06
1234.75	4.07778e-06	1.87307e-06	2.72492e-07		1234.27	-2.61049e-06	-5.78831e-06
1235.23	4.12695e-06	1.89593e-06	2.74016e-07		1234.75	-2.63344e-06	-5.63728e-06
1235.72	4.16804e-06	1.91423e-06	2.74764e-07		1235.23	-2.64494e-06	-5.54453e-06
1236.2	4.20094e-06	1.928e-06	2.74691e-07		1235.72	-2.62732e-06	-5.53254e-06
1236.68	4.22555e-06	1.93728e-06	2.73769e-07		1236.2	-2.56548e-06	-5.59919e-06
1237.16	4.2418e-06	1.94215e-06	2.71982e-07		1236.68	-2.46029e-06	-5.72605e-06
1237.65	4.24966e-06	1.94267e-06	2.69323e-07		1237.16	-2.33492e-06	-5.88865e-06
1238.13	4.2491e-06	1.93891e-06	2.65785e-07		1237.65	-2.23077e-06	-6.06904e-06
1238.61	4.24014e-06	1.93093e-06	2.61362e-07		1238.13	-2.19168e-06	-6.25566e-06
1239.09	4.22283e-06	1.91875e-06	2.56042e-07		1238.61	-2.2457e-06	-6.44308e-06
1239.57	4.19722e-06	1.90244e-06	2.49817e-07		1239.09	-2.39006e-06	-6.62295e-06
1240.06	4.16343e-06	1.88203e-06	2.42681e-07		1239.57	-2.5902e-06	-6.78333e-06
1240.54	4.12156e-06	1.85758e-06	2.34637e-07		1240.06	-2.79227e-06	-6.909e-06
1241.02	4.07177e-06	1.82918e-06	2.25695e-07		1240.54	-2.94234e-06	-6.98868e-06
1241.5	4.01423e-06	1.79694e-06	2.15869e-07		1241.02	-3.00597e-06	-7.018e-06
1241.98	3.94916e-06	1.76103e-06	2.05177e-07		1241.5	-2.97545e-06	-7.00318e-06
1242.47	3.87676e-06	1.72166e-06	1.93638e-07		1241.98	-2.86537e-06	-6.95148e-06
1242.95	3.7973e-06	1.67905e-06	1.81272e-07		1242.47	-2.70021e-06	-6.86494e-06
1243.43	3.71104e-06	1.63345e-06	1.68104e-07		1242.95	-2.50104e-06	-6.73233e-06
1243.91	3.61827e-06	1.58512e-06	1.54172e-07		1243.43	-2.27758e-06	-6.53168e-06
1244.4	3.51932e-06	1.53429e-06	1.3953e-07		1243.91	-2.03008e-06	-6.23834e-06
1244.88	3.4145e-06	1.48117e-06	1.2425e-07		1244.4	-1.75981e-06	-5.83992e-06
1245.36	3.30417e-06	1.42594e-06	1.08418e-07		1244.88	-1.47786e-06	-5.34454e-06
1245.84	3.1887e-06	1.36876e-06	9.21291e-08		1245.36	-1.20974e-06	-4.78407e-06
1246.32	3.06846e-06	1.30974e-06	7.54787e-08		1245.84	-9.89896e-07	-4.20382e-06
1246.81	2.94384e-06	1.24904e-06	5.85521e-08		1246.32	-8.49092e-07	-3.64827e-06
1247.29	2.81525e-06	1.18677e-06	4.14207e-08		1246.81	-8.00514e-07	-3.1448e-06
1247.77	2.68311e-06	1.12313e-06	2.41398e-08		1247.29	-8.33666e-07	-2.69811e-06
1248.25	2.54783e-06	1.0583e-06	6.75305e-09		1247.77	-9.14546e-07	-2.29201e-06
1248.73	2.40984e-06	9.92537e-07	-1.07015e-08		1248.25	-9.97677e-07	-1.90352e-06
1249.22	2.26957e-06	9.26101e-07	-2.8184e-08		1248.73	-1.04062e-06	-1.51571e-06
1249.7	2.12745e-06	8.59272e-07	-4.56467e-08		1249.22	-1.0186e-06	-1.13085e-06
1250.18	1.98393e-06	7.92322e-07	-6.30318e-08		1249.7	-9.30809e-07	-7.68101e-07
1250.66	1.83943e-06	7.25505e-07	-8.02724e-08		1250.18	-7.97199e-07	-4.58516e-07
1251.15	1.69438e-06	6.59046e-07	-9.72967e-08		1250.66	-6.4814e-07	-2.29454e-07
1251.63	1.54922e-06	5.93146e-07	-1.14034e-07		1251.15	-5.12202e-07	-9.45034e-08
1252.11	1.40436e-06	5.27981e-07	-1.30421e-07		1251.63	-4.06119e-07	-4.72512e-08
1252.59	1.26022e-06	4.6371e-07	-1.46404e-07		1252.11	-3.32187e-07	-6.62981e-08
1253.07	1.1172e-06	4.00483e-07	-1.61943e-07		1252.59	-2.80341e-07	-1.20255e-07
1253.56	9.75693e-07	3.38446e-07	-1.77002e-07		1253.07	-2.35911e-07	-1.79685e-07
1254.04	8.36087e-07	2.77739e-07	-1.91546e-07		1253.56	-1.85146e-07	-2.19462e-07
1254.52	6.9875e-07	2.18501e-07	-2.05534e-07		1254.04	-1.19879e-07	-2.21144e-07
1255	5.64037e-07	1.60866e-07	-2.18904e-07		1254.52	-3.81395e-08	-1.69007e-07
1255.48	4.32288e-07	1.0497e-07	-2.31579e-07		1255	5.7726e-08	-5.12645e-08
1255.97	3.03825e-07	5.09486e-08	-2.43464e-07		1255.48	1.63691e-07	1.39739e-07
1256.45	1.78953e-07	-1.05996e-09	-2.54456e-07		1255.97	2.73268e-07	3.99974e-07
1256.93	5.79601e-08	-5.09145e-08	-2.64454e-07		1256.45	3.8022e-07	7.10161e-07
1257.41	-5.88892e-08	-9.84757e-08	-2.73372e-07		1256.93	4.77419e-07	1.03488e-06
1257.9	-1.71349e-07	-1.43613e-07	-2.81146e-07		1257.41	5.57064e-07	1.33196e-06
1258.38	-2.79197e-07	-1.86213e-07	-2.87736e-07		1257.9	6.12316e-07	1.56366e-06
1258.86	-3.82231e-07	-2.26188e-07	-2.93118e-07		1258.38	6.39215e-07	1.71285e-06
1259.34	-4.80274e-07	-2.63483e-07	-2.9728e-07		1258.86	6.37764e-07	1.78734e-06
1259.82	-5.73173e-07	-2.9808e-07	-3.00205e-07		1259.34	6.13244e-07	1.81639e-06
1260.31	-6.608e-07	-3.29991e-07	-3.01873e-07		1259.82	5.73701e-07	1.83678e-06
1260.79	-7.43049e-07	-3.59266e-07	-3.02251e-07		1260.31	5.28998e-07	1.87797e-06
1261.27	-8.19842e-07	-3.85983e-07	-3.01301e-07		1260.79	4.88595e-07	1.95047e-06
1261.75	-8.91123e-07	-4.1024e-07	-2.98983e-07		1261.27	4.6206e-07	2.04619e-06
1262.23	-9.56863e-07	-4.3215e-07	-2.9526e-07		1261.75	4.58431e-07	2.14556e-06
1262.72	-1.01705e-06	-4.51822e-07	-2.90105e-07		1262.23	4.85858e-07	2.23177e-06
1263.2	-1.07171e-06	-4.69348e-07	-2.835e-07		1262.72	5.48249e-07	2.29987e-06
1263.68	-1.12088e-06	-4.8479e-07	-2.75435e-07		1263.2	6.44697e-07	2.3588e-06
1264.16	-1.16463e-06	-4.98173e-07	-2.65914e-07		1263.68	7.64608e-07	2.42243e-06
1264.65	-1.20302e-06	-5.09485e-07	-2.5495e-07		1264.16	8.89665e-07	2.49831e-06
1265.13	-1.23617e-06	-5.18693e-07	-2.4258e-07		1264.65	9.96277e-07	2.57905e-06
1265.61	-1.26421e-06	-5.25758e-07	-2.28863e-07		1265.13	1.06308e-06	2.64396e-06
1266.09	-1.28726e-06	-5.30653e-07	-2.13891e-07		1265.61	1.07715e-06	2.66758e-06
1266.57	-1.30548e-06	-5.33379e-07	-1.97784e-07		1266.09	1.03962e-06	2.63382e-06
1267.06	-1.31906e-06	-5.3398e-07	-1.80692e-07		1266.57	9.63811e-07	2.5446e-06
1267.54	-1.32817e-06	-5.32534e-07	-1.62778e-07		1267.06	8.71349e-07	2.42103e-06
1268.02	-1.33302e-06	-5.29151e-07	-1.44217e-07		1267.54	7.83921e-07	2.29398e-06
1268.5	-1.33381e-06	-5.23962e-07	-1.25177e-07		1268.02	7.16757e-07	2.19035e-06
1268.98	-1.33078e-06	-5.17104e-07	-1.05819e-07		1268.5	6.7541e-07	2.12252e-06
1269.47	-1.32414e-06	-5.08707e-07	-8.62878e-08		1268.98	6.56541e-07	2.08719e-06
1269.95	-1.31414e-06	-4.98895e-07	-6.67156e-08		1269.47	6.52446e-07	2.07198e-06
1270.43	-1.30104e-06	-4.8778e-07	-4.72212e-08		1269.95	6.55558e-07	2.06693e-06
1270.91	-1.28507e-06	-4.7547e-07	-2.79138e-08		1270.43	6.59675e-07	2.0719e-06
1271.4	-1.26649e-06	-4.62082e-07	-8.89656e-09		1270.91	6.59574e-07	2.09637e-06
1271.88	-1.24557e-06	-4.47744e-07	9.73035e-09		1271.4	6.49168e-07	2.1512e-06
1272.36	-1.22257e-06	-4.32609e-07	2.78655e-08		1271.88	6.21423e-07	2.23707e-06
1272.84	-1.19775e-06	-4.16847e-07	4.54035e-08		1272.36	5.71029e-07	2.33503e-06
1273.32	-1.17137e-06	-4.00645e-07	6.22336e-08		1272.84	4.9921e-07	2.40673e-06
1273.81	-1.14369e-06	-3.8419e-07	7.82426e-08		1273.32	4.1582e-07	2.40313e-06
1274.29	-1.11497e-06	-3.67659e-07	9.33203e-08		1273.81	3.39122e-07	2.28137e-06
1274.77	-1.08546e-06	-3.51205e-07	1.0737e-07		1274.29	2.87911e-07	2.02002e-06
1275.25	-1.0554e-06	-3.34956e-07	1.20316e-07		1274.77	2.74137e-07	1.62777e-06
1275.73	-1.02504e-06	-3.19015e-07	1.32116e-07		1275.25	2.94197e-07	1.14095e-06
1276.22	-9.94611e-07	-3.03467e-07	1.42755e-07		1275.73	3.30115e-07	6.1531e-07
1276.7	-9.64332e-07	-2.88395e-07	1.52244e-07		1276.22	3.53641e-07	1.10413e-07
1277.18	-9.34416e-07	-2.73887e-07	1.60603e-07		1276.7	3.40354e-07	-3.22357e-07
1277.66	-9.05066e-07	-2.60043e-07	1.67846e-07		1277.18	2.80373e-07	-6.49524e-07
1278.15	-8.7647e-07	-2.46982e-07	1.73968e-07		1277.66	1.85889e-07	-8.57836e-07
1278.63	-8.48805e-07	-2.34838e-07	1.78936e-07		1278.15	8.67631e-08	-9.53177e-07
1279.11	-8.22234e-07	-2.23756e-07	1.82698e-07		1278.63	1.85513e-08	-9.55157e-07
1279.59	-7.96904e-07	-2.13889e-07	1.85189e-07		1279.11	3.65528e-09	-8.93593e-07
1280.07	-7.72951e-07	-2.05386e-07	1.86353e-07		1279.59	4.04449e-08	-8.01409e-07
1280.56	-7.50491e-07	-1.9839e-07	1.86153e-07		1280.07	1.00045e-07	-7.10219e-07
1281.04	-7.29629e-07	-1.93023e-07	1.84587e-07		1280.56	1.38612e-07	-6.41484e-07
1281.52	-7.1045e-07	-1.89384e-07	1.81684e-07		1281.04	1.17648e-07	-6.02826e-07
1282	-6.93027e-07	-1.87543e-07	1.77503e-07		1281.52	2.22645e-08	-5.85549e-07
1282.48	-6.77414e-07	-1.87539e-07	1.72114e-07		1282	-1.29974e-07	-5.71127e-07
1282.97	-6.63652e-07	-1.89382e-07	1.65597e-07		1282.48	-2.95674e-07	-5.39449e-07
1283.45	-6.51764e-07	-1.93061e-07	1.58024e-07		1282.97	-4.23912e-07	-4.81923e-07
1283.93	-6.41759e-07	-1.98548e-07	1.4946e-07		1283.45	-4.7659e-07	-4.05306e-07
1284.41	-6.33629e-07	-2.05804e-07	1.39964e-07		1283.93	-4.42371e-07	-3.31166e-07
1284.9	-6.27355e-07	-2.14784e-07	1.29591e-07		1284.41	-3.38446e-07	-2.84019e-07
1285.38	-6.229e-07	-2.25428e-07	1.18394e-07		1284.9	-2.01789e-07	-2.80767e-07
1285.86	-6.20215e-07	-2.37662e-07	1.06432e-07		1285.38	-7.27222e-08	-3.20147e-07
1286.34	-6.19239e-07	-2.51389e-07	9.37665e-08		1285.86	1.8936e-08	-3.83204e-07
1286.82	-6.19898e-07	-2.66485e-07	8.04658e-08		1286.34	6.19924e-08	-4.40269e-07
1287.31	-6.22107e-07	-2.82805e-07	6.66023e-08		1286.82	6.22231e-08	-4.65055e-07
1287.79	-6.25771e-07	-3.0019e-07	5.22537e-08		1287.31	3.6473e-08	-4.44369e-07
1288.27	-6.30785e-07	-3.18477e-07	3.75035e-08		1287.79	3.47917e-09	-3.83377e-07
1288.75	-6.37036e-07	-3.3751e-07	2.24424e-08		1288.27	-1.90559e-08	-2.98752e-07
1289.23	-6.44404e-07	-3.57144e-07	7.16822e-09		1288.75	-1.69541e-08	-2.09059e-07
1289.72	-6.52764e-07	-3.77249e-07	-8.21497e-09		1289.23	2.04438e-08	-1.2477e-07
1290.2	-6.61983e-07	-3.97702e-07	-2.35983e-08		1289.72	9.79707e-08	-4.569e-08
1290.68	-6.71927e-07	-4.18378e-07	-3.88708e-08		1290.2	2.13678e-07	3.83421e-08
1291.16	-6.82458e-07	-4.39148e-07	-5.39225e-08		1290.68	3.54102e-07	1.37199e-07
1291.65	-6.93437e-07	-4.59871e-07	-6.86471e-08		1291.16	4.955e-07	2.55872e-07
1292.13	-7.04723e-07	-4.80397e-07	-8.29437e-08		1291.65	6.08235e-07	3.91132e-07
1292.61	-7.16178e-07	-5.00572e-07	-9.67183e-08		1292.13	6.66584e-07	5.36866e-07
1293.09	-7.27665e-07	-5.20238e-07	-1.09883e-07		1292.61	6.59969e-07	6.90404e-07
1293.57	-7.39049e-07	-5.39233e-07	-1.22355e-07		1293.09	6.00468e-07	8.58826e-07
1294.06	-7.502e-07	-5.57394e-07	-1.34053e-07		1293.57	5.19467e-07	1.05353e-06
1294.54	-7.60993e-07	-5.7455e-07	-1.44897e-07		1294.06	4.58181e-07	1.2838e-06
1295.02	-7.7131e-07	-5.90526e-07	-1.54805e-07		1294.54	4.52305e-07	1.54517e-06
1295.5	-7.81038e-07	-6.0515e-07	-1.63694e-07		1295.02	5.20493e-07	1.81446e-06
1295.98	-7.90073e-07	-6.18259e-07	-1.71476e-07		1295.5	6.5871e-07	2.05329e-06
1296.47	-7.9832e-07	-6.29714e-07	-1.78069e-07		1295.98	8.44977e-07	2.22212e-06
1296.95	-8.05692e-07	-6.39408e-07	-1.83393e-07		1296.47	1.04751e-06	2.29504e-06
1297.43	-8.1211e-07	-6.47272e-07	-1.87383e-07		1296.95	1.23511e-06	2.27318e-06
1297.91	-8.17507e-07	-6.53271e-07	-1.89988e-07		1297.43	1.38338e-06	2.18558e-06
1298.39	-8.21824e-07	-6.57394e-07	-1.91177e-07		1297.91	1.47714e-06	2.0793e-06
1298.88	-8.25013e-07	-6.59638e-07	-1.90945e-07		1298.39	1.50868e-06	2.0018e-06
1299.36	-8.27035e-07	-6.6e-07	-1.89311e-07		1298.88	1.47832e-06	1.98485e-06
1299.84	-8.27862e-07	-6.58464e-07	-1.86325e-07		1299.36	1.39261e-06	2.0342e-06
1300.32	-8.27472e-07	-6.55001e-07	-1.82067e-07		1299.84	1.26787e-06	2.13291e-06
1300.81	-8.25856e-07	-6.49578e-07	-1.76645e-07		1300.32	1.13008e-06	2.25215e-06
1301.29	-8.23012e-07	-6.42163e-07	-1.70186e-07		1300.81	1.01146e-06	2.36358e-06
1301.77	-8.18945e-07	-6.32733e-07	-1.62827e-07		1301.29	9.4073e-07	2.44607e-06
1302.25	-8.1367e-07	-6.21284e-07	-1.54701e-07		1301.77	9.33923e-07	2.48767e-06
1302.73	-8.07208e-07	-6.07828e-07	-1.45929e-07		1302.25	9.83746e-07	2.48106e-06
1303.22	-7.99586e-07	-5.92395e-07	-1.36615e-07		1302.73	1.06054e-06	2.42134e-06
1303.7	-7.90838e-07	-5.75033e-07	-1.26846e-07		1303.22	1.11928e-06	2.30464e-06
1304.18	-7.81004e-07	-5.55807e-07	-1.16693e-07		1303.7	1.11722e-06	2.13208e-06
1304.66	-7.70129e-07	-5.34803e-07	-1.06223e-07		1304.18	1.02874e-06	1.91223e-06
1305.14	-7.58262e-07	-5.1213e-07	-9.55019e-08		1304.66	8.5936e-07	1.66363e-06
1305.63	-7.45457e-07	-4.87924e-07	-8.45969e-08		1305.14	6.42907e-07	1.4106e-06
1306.11	-7.31771e-07	-4.6235e-07	-7.35771e-08		1305.63	4.31182e-07	1.17501e-06
1306.59	-7.17264e-07	-4.35604e-07	-6.25064e-08		1306.11	2.72942e-07	9.67778e-07
1307.07	-7.02e-07	-4.07905e-07	-5.14364e-08		1306.59	1.97762e-07	7.86407e-07
1307.56	-6.86043e-07	-3.79488e-07	-4.04012e-08		1307.07	2.05708e-07	6.17004e-07
1308.04	-6.69459e-07	-3.50595e-07	-2.94177e-08		1307.56	2.71252e-07	4.45095e-07
1308.52	-6.52314e-07	-3.2146e-07	-1.84923e-08		1308.04	3.54341e-07	2.64204e-07
1309	-6.34675e-07	-2.92303e-07	-7.63184e-09		1308.52	4.17414e-07	8.19247e-08
1309.48	-6.16608e-07	-2.63319e-07	3.14585e-09		1309	4.35775e-07	-8.30145e-08
1309.97	-5.98177e-07	-2.34676e-07	1.38059e-08		1309.48	4.02301e-07	-2.09911e-07
1310.45	-5.79444e-07	-2.06517e-07	2.42982e-08		1309.97	3.23477e-07	-2.87493e-07
1310.93	-5.60471e-07	-1.78964e-07	3.45664e-08		1310.45	2.1103e-07	-3.20939e-07
1311.41	-5.41314e-07	-1.52135e-07	4.45618e-08		1310.93	7.55196e-08	-3.33036e-07
1311.89	-5.22027e-07	-1.26144e-07	5.4254e-08		1311.41	-7.40666e-08	-3.5339e-07
1312.38	-5.0266e-07	-1.01114e-07	6.36365e-08		1311.89	-2.2838e-07	-4.094e-07
1312.86	-4.83257e-07	-7.71733e-08	7.27239e-08		1312.38	-3.73696e-07	-5.14095e-07
1313.34	-4.63858e-07	-5.44548e-08	8.15415e-08		1312.86	-4.91172e-07	-6.64079e-07
1313.82	-4.44496e-07	-3.30851e-08	9.01138e-08		1313.34	-5.60939e-07	-8.41801e-07
1314.31	-4.25199e-07	-1.31782e-08	9.84533e-08		1313.82	-5.70003e-07	-1.02347e-06
1314.79	-4.05988e-07	5.17123e-09	1.06557e-07		1314.31	-5.17516e-07	-1.1851e-06
1315.27	-3.86878e-07	2.18888e-08	1.14409e-07		1314.79	-4.18282e-07	-1.30798e-06
1315.75	-3.67876e-07	3.69218e-08	1.21983e-07		1315.27	-2.9702e-07	-1.37684e-06
1316.23	-3.48983e-07	5.02375e-08	1.29251e-07		1315.75	-1.80887e-07	-1.37895e-06
1316.72	-3.30194e-07	6.18246e-08	1.36185e-07		1316.23	-9.06425e-08	-1.30077e-06
1317.2	-3.11497e-07	7.16938e-08	1.42757e-07		1316.72	-3.63986e-08	-1.13202e-06
1317.68	-2.92874e-07	7.98799e-08	1.48934e-07		1317.2	-1.76909e-08	-8.71371e-07
1318.16	-2.743e-07	8.64413e-08	1.54675e-07		1317.68	-3.07322e-08	-5.35354e-07
1318.64	-2.55746e-07	9.14586e-08	1.59938e-07		1318.16	-7.31879e-08	-1.62559e-07
1319.13	-2.37177e-07	9.50293e-08	1.64682e-07		1318.64	-1.48115e-07	1.9048e-07
1319.61	-2.18554e-07	9.7264e-08	1.6888e-07		1319.13	-2.60393e-07	4.65254e-07
1320.09	-1.99835e-07	9.82818e-08	1.72529e-07		1319.61	-4.08986e-07	6.213e-07
1320.57	-1.80973e-07	9.8209e-08	1.75656e-07		1320.09	-5.80421e-07	6.51943e-07
1321.06	-1.61919e-07	9.71798e-08	1.78312e-07		1320.57	-7.47699e-07	5.83645e-07
1321.54	-1.42623e-07	9.53374e-08	1.80561e-07		1321.06	-8.75679e-07	4.61612e-07
1322.02	-1.23033e-07	9.28325e-08	1.82464e-07		1321.54	-9.32764e-07	3.28844e-07
1322.5	-1.03099e-07	8.98212e-08	1.84057e-07		1322.02	-9.00816e-07	2.12558e-07
1322.98	-8.27698e-08	8.64591e-08	1.85342e-07		1322.5	-7.80297e-07	1.21576e-07
1323.47	-6.19961e-08	8.28986e-08	1.86285e-07		1322.98	-5.89235e-07	5.65217e-08
1323.95	-4.07322e-08	7.9286e-08	1.86833e-07		1323.47	-3.5575e-07	2.0214e-08
1324.43	-1.89355e-08	7.57633e-08	1.86932e-07		1323.95	-1.09961e-07	2.38339e-08
1324.91	3.43223e-09	7.2465e-08	1.86553e-07		1324.43	1.21159e-07	8.175e-08
1325.39	2.64037e-08	6.95209e-08	1.85702e-07		1324.91	3.16895e-07	2.00926e-07
1325.88	5.00054e-08	6.7055e-08	1.84423e-07		1325.39	4.6147e-07	3.69706e-07
1326.36	7.42571e-08	6.51893e-08	1.82786e-07		1325.88	5.4425e-07	5.56546e-07
1326.84	9.91703e-08	6.40439e-08	1.80868e-07		1326.36	5.60597e-07	7.18135e-07
1327.32	1.24748e-07	6.37381e-08	1.78745e-07		1326.84	5.15065e-07	8.16971e-07
1327.81	1.50985e-07	6.43885e-08	1.76473e-07		1327.32	4.23839e-07	8.36908e-07
1328.29	1.77866e-07	6.61059e-08	1.74089e-07		1327.81	3.14561e-07	7.92572e-07
1328.77	2.05364e-07	6.89913e-08	1.71609e-07		1328.29	2.20033e-07	7.22312e-07
1329.25	2.33443e-07	7.31312e-08	1.69034e-07		1328.77	1.68581e-07	6.71437e-07
1329.73	2.62056e-07	7.85921e-08	1.66354e-07		1329.25	1.71947e-07	6.72435e-07
1330.22	2.91146e-07	8.54145e-08	1.63561e-07		1329.73	2.20272e-07	7.31808e-07
1330.7	3.20642e-07	9.3608e-08	1.60647e-07		1330.22	2.84974e-07	8.30047e-07
1331.18	3.50465e-07	1.03147e-07	1.57605e-07		1330.7	3.30572e-07	9.35586e-07
1331.66	3.80523e-07	1.1397e-07	1.54429e-07		1331.18	3.29415e-07	1.01885e-06
1332.14	4.10714e-07	1.2598e-07	1.51102e-07		1331.66	2.73786e-07	1.06519e-06
1332.63	4.40925e-07	1.39053e-07	1.47594e-07		1332.14	1.79369e-07	1.0771e-06
1333.11	4.71032e-07	1.53043e-07	1.43854e-07		1332.63	7.93881e-08	1.06599e-06
1333.59	5.00904e-07	1.67794e-07	1.39818e-07		1333.11	8.9122e-09	1.03999e-06
1334.07	5.30397e-07	1.8315e-07	1.35405e-07		1333.59	-9.3804e-09	9.98025e-07
1334.56	5.59362e-07	1.98961e-07	1.3053e-07		1334.07	2.5045e-08	9.28106e-07
1335.04	5.87641e-07	2.15089e-07	1.25112e-07		1334.56	9.26838e-08	8.17993e-07
1335.52	6.15069e-07	2.31413e-07	1.19083e-07		1335.04	1.62935e-07	6.6499e-07
1336	6.41476e-07	2.47826e-07	1.12397e-07		1335.52	2.06645e-07	4.7876e-07
1336.48	6.66686e-07	2.64239e-07	1.05024e-07		1336	2.03832e-07	2.77396e-07
1336.97	6.9052e-07	2.80578e-07	9.69514e-08		1336.48	1.48234e-07	7.70382e-08
1337.45	7.12796e-07	2.96772e-07	8.81751e-08		1336.97	4.34839e-08	-1.18316e-07
1337.93	7.33329e-07	3.12751e-07	7.87012e-08		1337.45	-9.99386e-08	-3.17943e-07
1338.41	7.51936e-07	3.28434e-07	6.85459e-08		1337.93	-2.68534e-07	-5.38583e-07
1338.89	7.68429e-07	3.43716e-07	5.77382e-08		1338.41	-4.45122e-07	-7.91436e-07
1339.38	7.82625e-07	3.5846e-07	4.63202e-08		1338.89	-6.08868e-07	-1.06966e-06
1339.86	7.94342e-07	3.72489e-07	3.43462e-08		1339.38	-7.35076e-07	-1.34524e-06
1340.34	8.034e-07	3.85593e-07	2.18802e-08		1339.86	-8.02018e-07	-1.57722e-06
1340.82	8.09622e-07	3.97537e-07	8.99596e-09		1340.34	-7.99257e-07	-1.73083e-06
1341.31	8.12838e-07	4.08075e-07	-4.22422e-09		1340.82	-7.3788e-07	-1.80112e-06
1341.79	8.12882e-07	4.16969e-07	-1.76898e-08		1341.31	-6.53035e-07	-1.82402e-06
1342.27	8.09596e-07	4.24006e-07	-3.13036e-08		1341.79	-5.94006e-07	-1.8664e-06
1342.75	8.02829e-07	4.28999e-07	-4.49655e-08		1342.27	-6.02316e-07	-1.99242e-06
1343.23	7.92438e-07	4.31795e-07	-5.85762e-08		1342.75	-6.94196e-07	-2.23017e-06
1343.72	7.78291e-07	4.3227e-07	-7.20403e-08		1343.23	-8.52105e-07	-2.55484e-06
1344.2	7.60264e-07	4.30325e-07	-8.52695e-08		1343.72	-1.03491e-06	-2.90458e-06
1344.68	7.38248e-07	4.25885e-07	-9.81838e-08		1344.2	-1.19612e-06	-3.21185e-06
1345.16	7.12143e-07	4.1889e-07	-1.10712e-07		1344.68	-1.30096e-06	-3.43296e-06
1345.64	6.81862e-07	4.09298e-07	-1.22788e-07		1345.16	-1.33466e-06	-3.55744e-06
1346.13	6.47334e-07	3.97081e-07	-1.34347e-07		1345.64	-1.30476e-06	-3.60143e-06
1346.61	6.08502e-07	3.8222e-07	-1.45322e-07		1346.13	-1.23263e-06	-3.58738e-06
1347.09	5.65323e-07	3.64706e-07	-1.5564e-07		1346.61	-1.14339e-06	-3.52847e-06
1347.57	5.17772e-07	3.44538e-07	-1.65235e-07		1347.09	-1.05438e-06	-3.41979e-06
1348.06	4.65841e-07	3.21726e-07	-1.74057e-07		1347.57	-9.69788e-07	-3.24442e-06
1348.54	4.0954e-07	2.96292e-07	-1.82088e-07		1348.06	-8.83004e-07	-2.98705e-06
1349.02	3.48896e-07	2.68276e-07	-1.8935e-07		1348.54	-7.84872e-07	-2.64958e-06
1349.5	2.83957e-07	2.37742e-07	-1.959e-07		1349.02	-6.70934e-07	-2.25585e-06
1349.98	2.14788e-07	2.04772e-07	-2.01819e-07		1349.5	-5.45617e-07	-1.84525e-06
1350.47	1.41477e-07	1.69471e-07	-2.07188e-07		1349.98	-4.19519e-07	-1.45602e-06
1350.95	6.41306e-08	1.31948e-07	-2.12073e-07		1350.47	-3.03538e-07	-1.1109e-06
1351.43	-1.71243e-08	9.23206e-08	-2.16507e-07		1350.95	-2.03821e-07	-8.09593e-07
1351.91	-1.02139e-07	5.07015e-08	-2.20492e-07		1351.43	-1.18941e-07	-5.35076e-07
1352.39	-1.90744e-07	7.20635e-09	-2.23997e-07		1351.91	-4.18868e-08	-2.6654e-07
1352.88	-2.82749e-07	-3.80421e-08	-2.26982e-07		1352.39	3.29448e-08	3.36833e-09
1353.36	-3.77944e-07	-8.4904e-08	-2.29409e-07		1352.88	1.0528e-07	2.64698e-07
1353.84	-4.76098e-07	-1.33216e-07	-2.31257e-07		1353.36	1.673e-07	4.95736e-07
1354.32	-5.76962e-07	-1.82791e-07	-2.32531e-07		1353.84	2.07795e-07	6.81581e-07
1354.8	-6.80266e-07	-2.3342e-07	-2.3326e-07		1354.32	2.20529e-07	8.26458e-07
1355.29	-7.85724e-07	-2.84885e-07	-2.33483e-07		1354.8	2.10447e-07	9.54885e-07
1355.77	-8.93034e-07	-3.36969e-07	-2.33238e-07		1355.29	1.92972e-07	1.09738e-06
1356.25	-1.00187e-06	-3.89462e-07	-2.32549e-07		1355.77	1.90438e-07	1.2756e-06
1356.73	-1.11191e-06	-4.42168e-07	-2.31423e-07		1356.25	2.2221e-07	1.4899e-06
1357.22	-1.2228e-06	-4.94898e-07	-2.29851e-07		1356.73	2.98413e-07	1.7215e-06
1357.7	-1.33417e-06	-5.47466e-07	-2.27826e-07		1357.22	4.16535e-07	1.93794e-06
1358.18	-1.44566e-06	-5.99685e-07	-2.25351e-07		1357.7	5.60527e-07	2.10598e-06
1358.66	-1.55688e-06	-6.51366e-07	-2.22457e-07		1358.18	7.05679e-07	2.20065e-06
1359.14	-1.66745e-06	-7.02324e-07	-2.19208e-07		1358.66	8.27396e-07	2.21389e-06
1359.63	-1.77696e-06	-7.52379e-07	-2.15695e-07		1359.14	9.09411e-07	2.15606e-06
1360.11	-1.885e-06	-8.01371e-07	-2.12031e-07		1359.63	9.496e-07	2.05536e-06
1360.59	-1.99117e-06	-8.49162e-07	-2.08332e-07		1360.11	9.6067e-07	1.94844e-06
1361.07	-2.09506e-06	-8.95638e-07	-2.04693e-07		1360.59	9.64101e-07	1.8712e-06
1361.55	-2.19625e-06	-9.40708e-07	-2.01174e-07		1361.07	9.83104e-07	1.84793e-06
1362.04	-2.29432e-06	-9.84294e-07	-1.97796e-07		1361.55	1.03429e-06	1.88874e-06
1362.52	-2.38886e-06	-1.02633e-06	-1.94547e-07		1362.04	1.12335e-06	1.99084e-06
1363	-2.47946e-06	-1.06676e-06	-1.91389e-07		1362.52	1.24418e-06	2.1438e-06
1363.48	-2.56571e-06	-1.10552e-06	-1.88266e-07		1363	1.38165e-06	2.33087e-06
1363.97	-2.64721e-06	-1.14255e-06	-1.85102e-07		1363.48	1.51622e-06	2.52939e-06
1364.45	-2.72356e-06	-1.17778e-06	-1.81807e-07		1363.97	1.62865e-06	2.71021e-06
1364.93	-2.79438e-06	-1.21116e-06	-1.78285e-07		1364.45	1.70434e-06	2.84582e-06
1365.41	-2.85929e-06	-1.24261e-06	-1.74459e-07		1364.93	1.7357e-06	2.92341e-06
1365.89	-2.91792e-06	-1.2721e-06	-1.7029e-07		1365.41	1.72619e-06	2.96149e-06
1366.38	-2.96992e-06	-1.29952e-06	-1.65785e-07		1365.89	1.6876e-06	3.01205e-06
1366.86	-3.01495e-06	-1.32479e-06	-1.60998e-07		1366.38	1.63883e-06	3.14389e-06
1367.34	-3.05268e-06	-1.34776e-06	-1.56012e-07		1366.86	1.59795e-06	3.40737e-06
1367.82	-3.08281e-06	-1.36824e-06	-1.50931e-07		1367.34	1.57832e-06	3.80717e-06
1368.3	-3.10503e-06	-1.38605e-06	-1.45863e-07		1367.82	1.58469e-06	4.29564e-06
1368.79	-3.11908e-06	-1.40096e-06	-1.40916e-07		1368.3	1.61438e-06	4.79436e-06
1369.27	-3.12471e-06	-1.41278e-06	-1.36191e-07		1368.79	1.6572e-06	5.22191e-06
1369.75	-3.12168e-06	-1.42131e-06	-1.31776e-07		1369.27	1.6995e-06	5.51968e-06
1370.23	-3.10978e-06	-1.4264e-06	-1.27747e-07		1369.75	1.72599e-06	5.65945e-06
1370.72	-3.08883e-06	-1.4279e-06	-1.24158e-07		1370.23	1.72641e-06	5.64408e-06
1371.2	-3.05867e-06	-1.42568e-06	-1.21042e-07		1370.72	1.69792e-06	5.50056e-06
1371.68	-3.01917e-06	-1.41959e-06	-1.18406e-07		1371.2	1.64683e-06	5.27037e-06
1372.16	-2.97022e-06	-1.40948e-06	-1.16229e-07		1371.68	1.58647e-06	4.99705e-06
1372.64	-2.91174e-06	-1.39517e-06	-1.14465e-07		1372.16	1.53375e-06	4.71973e-06
1373.13	-2.84368e-06	-1.37651e-06	-1.13038e-07		1372.64	1.50552e-06	4.46764e-06
1373.61	-2.76604e-06	-1.35332e-06	-1.11855e-07		1373.13	1.51418e-06	4.26239e-06
1374.09	-2.67882e-06	-1.32548e-06	-1.10802e-07		1373.61	1.56093e-06	4.11889e-06
1374.57	-2.58206e-06	-1.29289e-06	-1.09751e-07		1374.09	1.63326e-06	4.04427e-06
1375.05	-2.47586e-06	-1.2555e-06	-1.08558e-07		1374.57	1.70451e-06	4.03257e-06
1375.54	-2.36032e-06	-1.21329e-06	-1.07071e-07		1375.05	1.74248e-06	4.0651e-06
1376.02	-2.23559e-06	-1.16629e-06	-1.05131e-07		1375.54	1.72071e-06	4.11263e-06
1376.5	-2.10185e-06	-1.11457e-06	-1.02588e-07		1376.02	1.63089e-06	4.14362e-06
1376.98	-1.95931e-06	-1.05824e-06	-9.9302e-08		1376.5	1.48698e-06	4.1338e-06
1377.47	-1.80824e-06	-9.97439e-07	-9.51546e-08		1376.98	1.32645e-06	4.07319e-06
1377.95	-1.64891e-06	-9.32341e-07	-9.00425e-08		1377.47	1.20106e-06	3.96771e-06
1378.43	-1.48166e-06	-8.63149e-07	-8.38765e-08		1377.95	1.16217e-06	3.83735e-06
1378.91	-1.30682e-06	-7.9007e-07	-7.65814e-08		1378.43	1.23833e-06	3.70653e-06
1379.39	-1.12481e-06	-7.13305e-07	-6.81025e-08		1378.91	1.41913e-06	3.59389e-06
1379.88	-9.36029e-07	-6.33021e-07	-5.84177e-08		1379.39	1.65185e-06	3.50345e-06
1380.36	-7.40944e-07	-5.49362e-07	-4.7549e-08		1379.88	1.86223e-06	3.42099e-06
1380.84	-5.4004e-07	-4.62454e-07	-3.55618e-08		1380.36	1.98163e-06	3.31614e-06
1381.32	-3.33832e-07	-3.72435e-07	-2.25527e-08		1380.84	1.97173e-06	3.15414e-06
1381.8	-1.22863e-07	-2.79468e-07	-8.63083e-09		1381.32	1.83468e-06	2.91123e-06
1382.29	9.22975e-08	-1.83745e-07	6.0973e-09		1381.8	1.60812e-06	2.59306e-06
1382.77	3.11054e-07	-8.5495e-08	2.1535e-08		1382.29	1.3503e-06	2.23939e-06
1383.25	5.32789e-07	1.50293e-08	3.75922e-08		1382.77	1.11696e-06	1.90893e-06
1383.73	7.56864e-07	1.17552e-07	5.41751e-08		1383.25	9.34163e-07	1.64114e-06
1384.22	9.82623e-07	2.21783e-07	7.11706e-08		1383.73	7.85158e-07	1.42674e-06
1384.7	1.20939e-06	3.27421e-07	8.8434e-08		1384.22	6.18646e-07	1.20417e-06
1385.18	1.43648e-06	4.34157e-07	1.05789e-07		1384.7	3.80831e-07	8.94844e-07
1385.66	1.66319e-06	5.41671e-07	1.23044e-07		1385.18	4.89471e-08	4.49337e-07
1386.14	1.88882e-06	6.49631e-07	1.40018e-07		1385.66	-3.53623e-07	-1.23526e-07
1386.63	2.11265e-06	7.57688e-07	1.5657e-07		1386.14	-7.68604e-07	-7.65569e-07
1387.11	2.33396e-06	8.65477e-07	1.72611e-07		1386.63	-1.12843e-06	-1.39889e-06
1387.59	2.55203e-06	9.72618e-07	1.88101e-07		1387.11	-1.38659e-06	-1.96249e-06
1388.07	2.76614e-06	1.07872e-06	2.03034e-07		1387.59	-1.53275e-06	-2.43159e-06
1388.55	2.97559e-06	1.1834e-06	2.1742e-07		1388.07	-1.59609e-06	-2.82223e-06
1389.04	3.17967e-06	1.28626e-06	2.31264e-07		1388.55	-1.63293e-06	-3.17637e-06
1389.52	3.37767e-06	1.38693e-06	2.44564e-07		1389.04	-1.70509e-06	-3.54276e-06
1390	3.56892e-06	1.48507e-06	2.57298e-07		1389.52	-1.85398e-06	-3.95594e-06
1390.48	3.75274e-06	1.58037e-06	2.69426e-07		1390	-2.08668e-06	-4.42763e-06
1390.97	3.92849e-06	1.67252e-06	2.8089e-07		1390.48	-2.3754e-06	-4.94917e-06
1391.45	4.09551e-06	1.76125e-06	2.91627e-07		1390.97	-2.67197e-06	-5.50541e-06
1391.93	4.25321e-06	1.84629e-06	3.01569e-07		1391.45	-2.9301e-06	-6.08506e-06
1392.41	4.40099e-06	1.92735e-06	3.10657e-07		1391.93	-3.12324e-06	-6.68727e-06
1392.89	4.53828e-06	2.00413e-06	3.18837e-07		1392.41	-3.24804e-06	-7.31321e-06
1393.38	4.66454e-06	2.0763e-06	3.26067e-07		1392.89	-3.31782e-06	-7.95382e-06
1393.86	4.77927e-06	2.14352e-06	3.32314e-07		1393.38	-3.34835e-06	-8.5772e-06
1394.34	4.88198e-06	2.20542e-06	3.37553e-07		1393.86	-3.34534e-06	-9.12921e-06
1394.82	4.97224e-06	2.26163e-06	3.41771e-07		1394.34	-3.30211e-06	-9.54734e-06
1395.3	5.04962e-06	2.31179e-06	3.44966e-07		1394.82	-3.20753e-06	-9.78507e-06
1395.79	5.11377e-06	2.35552e-06	3.47152e-07		1395.3	-3.05905e-06	-9.82935e-06
1396.27	5.16435e-06	2.39253e-06	3.48343e-07		1395.79	-2.87604e-06	-9.70512e-06
1396.75	5.20108e-06	2.42255e-06	3.48545e-07		1396.27	-2.70424e-06	-9.46578e-06
1397.23	5.22369e-06	2.44539e-06	3.47729e-07		1396.75	-2.60896e-06	-9.18588e-06
1397.72	5.232e-06	2.46096e-06	3.45823e-07		1397.23	-2.6504e-06	-8.95097e-06
1398.2	5.22585e-06	2.46919e-06	3.42725e-07		1397.72	-2.85102e-06	-8.84362e-06
1398.68	5.20514e-06	2.47003e-06	3.38332e-07		1398.2	-3.17174e-06	-8.90903e-06
1399.16	5.16979e-06	2.46344e-06	3.32573e-07		1398.68	-3.51938e-06	-9.12674e-06
1399.64	5.11982e-06	2.44935e-06	3.25428e-07		1399.16	-3.78755e-06	-9.41056e-06
1400.13	5.05525e-06	2.42771e-06	3.16935e-07		1399.64	-3.90616e-06	-9.64865e-06
1400.61	4.97619e-06	2.39845e-06	3.07187e-07		1400.13	-3.8644e-06	-9.74875e-06
1401.09	4.88278e-06	2.36153e-06	2.96322e-07		1400.61	-3.70005e-06	-9.66705e-06
1401.57	4.77521e-06	2.31694e-06	2.84498e-07		1401.09	-3.47063e-06	-9.39798e-06
1402.05	4.65374e-06	2.26471e-06	2.71861e-07		1401.57	-3.22902e-06	-8.95839e-06
1402.54	4.51867e-06	2.20494e-06	2.58519e-07		1402.05	-3.01392e-06	-8.38152e-06
1403.02	4.37034e-06	2.1378e-06	2.4453e-07		1402.54	-2.84754e-06	-7.7254e-06
1403.5	4.20917e-06	2.06356e-06	2.29909e-07		1403.02	-2.73344e-06	-7.07265e-06
1403.98	4.03558e-06	1.98253e-06	2.14646e-07		1403.5	-2.65727e-06	-6.51114e-06
1404.47	3.8501e-06	1.89508e-06	1.98726e-07		1403.98	-2.59353e-06	-6.09475e-06
1404.95	3.65324e-06	1.8016e-06	1.82146e-07		1404.47	-2.51545e-06	-5.81386e-06
1405.43	3.4456e-06	1.70251e-06	1.64919e-07		1404.95	-2.40466e-06	-5.59555e-06
1405.91	3.22781e-06	1.5982e-06	1.4709e-07		1405.43	-2.25669e-06	-5.34144e-06
1406.39	3.00053e-06	1.48911e-06	1.28742e-07		1405.91	-2.07951e-06	-4.9789e-06
1406.88	2.76445e-06	1.37566e-06	1.10002e-07		1406.39	-1.89353e-06	-4.50247e-06
1407.36	2.52033e-06	1.25832e-06	9.10348e-08		1406.88	-1.72622e-06	-3.97917e-06
1407.84	2.26891e-06	1.13757e-06	7.20224e-08		1407.36	-1.60664e-06	-3.51746e-06
1408.32	2.011e-06	1.01389e-06	5.31434e-08		1407.84	-1.55462e-06	-3.21291e-06
1408.8	1.74741e-06	8.87786e-07	3.45506e-08		1408.32	-1.57117e-06	-3.10312e-06
1409.29	1.47898e-06	7.59735e-07	1.63647e-08		1408.8	-1.63223e-06	-3.14974e-06
1409.77	1.20657e-06	6.30214e-07	-1.32013e-09		1409.29	-1.69514e-06	-3.26034e-06
1410.25	9.31051e-07	4.99675e-07	-1.84209e-08		1409.77	-1.70713e-06	-3.3259e-06
1410.73	6.53297e-07	3.68549e-07	-3.48526e-08		1410.25	-1.6224e-06	-3.25717e-06
1411.21	3.74201e-07	2.37251e-07	-5.05178e-08		1410.73	-1.41297e-06	-3.00105e-06
1411.7	9.46582e-08	1.0618e-07	-6.53058e-08		1411.21	-1.07661e-06	-2.54448e-06
1412.18	-1.84439e-07	-2.42767e-08	-7.90964e-08		1411.7	-6.3501e-07	-1.90677e-06
1412.66	-4.62198e-07	-1.53753e-07	-9.17701e-08		1412.18	-1.29411e-07	-1.13054e-06
1413.14	-7.37734e-07	-2.81907e-07	-1.03218e-07		1412.66	3.87342e-07	-2.7176e-07
1413.63	-1.01017e-06	-4.08422e-07	-1.13353e-07		1413.14	8.5419e-07	6.07061e-07
1414.11	-1.27865e-06	-5.33001e-07	-1.22112e-07		1413.63	1.20609e-06	1.44628e-06
1414.59	-1.54231e-06	-6.55357e-07	-1.29456e-07		1414.11	1.38096e-06	2.19833e-06
1415.07	-1.80033e-06	-7.75201e-07	-1.35368e-07		1414.59	1.34599e-06	2.84645e-06
1415.55	-2.0519e-06	-8.9223e-07	-1.39851e-07		1415.07	1.13285e-06	3.41926e-06
1416.04	-2.29624e-06	-1.00613e-06	-1.42926e-07		1415.55	8.56949e-07	3.98414e-06
1416.52	-2.53258e-06	-1.11656e-06	-1.44645e-07		1416.04	6.85024e-07	4.60983e-06
1417	-2.76019e-06	-1.22322e-06	-1.451e-07		1416.52	7.60571e-07	5.32323e-06
1417.48	-2.97837e-06	-1.3258e-06	-1.4444e-07		1417	1.13308e-06	6.08999e-06
1417.96	-3.18645e-06	-1.42401e-06	-1.42887e-07		1417.48	1.74377e-06	6.83819e-06
1418.45	-3.3838e-06	-1.51757e-06	-1.40714e-07		1417.96	2.46403e-06	7.49921e-06
1418.93	-3.56982e-06	-1.60619e-06	-1.38215e-07		1418.45	3.15609e-06	8.03815e-06
1419.41	-3.74394e-06	-1.68956e-06	-1.35665e-07		1418.93	3.7115e-06	8.45556e-06
1419.89	-3.90565e-06	-1.76739e-06	-1.33311e-07		1419.41	4.0681e-06	8.77559e-06
1420.38	-4.05447e-06	-1.8394e-06	-1.31362e-07		1419.89	4.21336e-06	9.0297e-06
1420.86	-4.18995e-06	-1.90534e-06	-1.29993e-07		1420.38	4.18104e-06	9.24709e-06
1421.34	-4.3117e-06	-1.96503e-06	-1.29328e-07		1420.86	4.03256e-06	9.44476e-06
1421.82	-4.41936e-06	-2.01829e-06	-1.29435e-07		1421.34	3.83371e-06	9.62324e-06
1422.3	-4.51263e-06	-2.065e-06	-1.3032e-07		1421.82	3.63247e-06	9.76263e-06
1422.79	-4.59125e-06	-2.10503e-06	-1.31929e-07		1422.3	3.45051e-06	9.8251e-06
1423.27	-4.65499e-06	-2.13829e-06	-1.3416e-07		1422.79	3.28526e-06	9.76066e-06
1423.75	-4.70371e-06	-2.16468e-06	-1.36876e-07		1423.27	3.12117e-06	9.52344e-06
1424.23	-4.73726e-06	-2.18413e-06	-1.39922e-07		1423.75	2.94239e-06	9.09171e-06
1424.71	-4.7556e-06	-2.19657e-06	-1.43145e-07		1424.23	2.74635e-06	8.49274e-06
1425.2	-4.75868e-06	-2.20193e-06	-1.46401e-07		1424.71	2.55109e-06	7.81005e-06
1425.68	-4.74654e-06	-2.20014e-06	-1.49554e-07		1425.2	2.3896e-06	7.16939e-06
1426.16	-4.71925e-06	-2.1911e-06	-1.52473e-07		1425.68	2.29145e-06	6.69766e-06
1426.64	-4.67693e-06	-2.17472e-06	-1.55027e-07		1426.16	2.26658e-06	6.47309e-06
1427.13	-4.61975e-06	-2.15096e-06	-1.5709e-07		1426.64	2.29676e-06	6.48761e-06
1427.61	-4.54791e-06	-2.11978e-06	-1.58554e-07		1427.13	2.34566e-06	6.64967e-06
1428.09	-4.46168e-06	-2.08124e-06	-1.59333e-07		1427.61	2.37486e-06	6.81959e-06
1428.57	-4.36137e-06	-2.03541e-06	-1.5937e-07		1428.09	2.35963e-06	6.87043e-06
1429.05	-4.24731e-06	-1.98245e-06	-1.58627e-07		1428.57	2.2941e-06	6.73464e-06
1429.54	-4.11991e-06	-1.92254e-06	-1.5708e-07		1429.05	2.19235e-06	6.42129e-06
1430.02	-3.9796e-06	-1.85593e-06	-1.54704e-07		1429.54	2.08088e-06	5.99332e-06
1430.5	-3.82684e-06	-1.78286e-06	-1.51463e-07		1430.02	1.99186e-06	5.53173e-06
1430.98	-3.66216e-06	-1.70363e-06	-1.47289e-07		1430.5	1.95003e-06	5.0975e-06
1431.46	-3.4861e-06	-1.61855e-06	-1.42077e-07		1430.98	1.96521e-06	4.71621e-06
1431.95	-3.29924e-06	-1.52799e-06	-1.35689e-07		1431.46	2.02791e-06	4.37913e-06
1432.43	-3.10221e-06	-1.43233e-06	-1.27973e-07		1431.95	2.1153e-06	4.06485e-06
1432.91	-2.89563e-06	-1.33198e-06	-1.18822e-07		1432.43	2.20197e-06	3.75939e-06
1433.39	-2.68017e-06	-1.22734e-06	-1.08227e-07		1432.91	2.27256e-06	3.47517e-06
1433.88	-2.45653e-06	-1.11879e-06	-9.63291e-08		1433.39	2.32329e-06	3.25152e-06
1434.36	-2.2254e-06	-1.00672e-06	-8.34112e-08		1433.88	2.3589e-06	3.14637e-06
1434.84	-1.98751e-06	-8.91542e-07	-6.98399e-08		1434.36	2.37924e-06	3.21699e-06
1435.32	-1.7436e-06	-7.7372e-07	-5.59897e-08		1434.84	2.36394e-06	3.49517e-06
1435.8	-1.49439e-06	-6.53765e-07	-4.21824e-08		1435.32	2.26425e-06	3.93994e-06
1436.29	-1.24066e-06	-5.32199e-07	-2.86623e-08		1435.8	2.02004e-06	4.40061e-06
1436.77	-9.83142e-07	-4.09512e-07	-1.56042e-08		1436.29	1.59919e-06	4.64227e-06
1437.25	-7.22597e-07	-2.8613e-07	-3.12906e-09		1436.77	1.03671e-06	4.45482e-06
1437.73	-4.59779e-07	-1.62427e-07	8.68618e-09		1437.25	4.3239e-07	3.76773e-06
1438.21	-1.95436e-07	-3.87389e-08	1.98124e-08		1437.73	-8.71131e-08	2.6922e-06
1438.7	6.96861e-08	8.46142e-08	3.02677e-08		1438.21	-4.25557e-07	1.4551e-06
1439.18	3.34852e-07	2.07332e-07	4.01036e-08		1438.7	-5.54248e-07	2.87434e-07
1439.66	5.99334e-07	3.29138e-07	4.93786e-08		1439.18	-5.1769e-07	-6.62505e-07
1440.14	8.62418e-07	4.49777e-07	5.81368e-08		1439.66	-4.07765e-07	-1.34848e-06
1440.63	1.1234e-06	5.69016e-07	6.63971e-08		1440.14	-3.23483e-07	-1.80654e-06
1441.11	1.38159e-06	6.86643e-07	7.41589e-08		1440.63	-3.28905e-07	-2.11383e-06
1441.59	1.63632e-06	8.02463e-07	8.14126e-08		1441.11	-4.37613e-07	-2.34878e-06
1442.07	1.88693e-06	9.16299e-07	8.81533e-08		1441.59	-6.25029e-07	-2.56694e-06
1442.55	2.13279e-06	1.02799e-06	9.43932e-08		1442.07	-8.60278e-07	-2.81553e-06
1443.04	2.37328e-06	1.13738e-06	1.0017e-07		1442.55	-1.12826e-06	-3.15511e-06
1443.52	2.6078e-06	1.24431e-06	1.05549e-07		1443.04	-1.42831e-06	-3.66333e-06
1444	2.83578e-06	1.34859e-06	1.10611e-07		1443.52	-1.75713e-06	-4.39983e-06
1444.48	3.05667e-06	1.44999e-06	1.15443e-07		1444	-2.09482e-06	-5.35408e-06
1444.96	3.26993e-06	1.54827e-06	1.20118e-07		1444.48	-2.40597e-06	-6.42006e-06
1445.45	3.47505e-06	1.64317e-06	1.2469e-07		1444.96	-2.65902e-06	-7.4341e-06
1445.93	3.67156e-06	1.73441e-06	1.2919e-07		1445.45	-2.84621e-06	-8.25115e-06
1446.41	3.859e-06	1.82175e-06	1.33644e-07		1445.93	-2.98884e-06	-8.81289e-06
1446.89	4.03693e-06	1.90494e-06	1.38084e-07		1446.41	-3.12366e-06	-9.15594e-06
1447.38	4.20495e-06	1.98379e-06	1.42549e-07		1446.89	-3.28117e-06	-9.36769e-06
1447.86	4.36267e-06	2.0581e-06	1.47091e-07		1447.38	-3.46761e-06	-9.52406e-06
1448.34	4.50975e-06	2.12769e-06	1.51754e-07		1447.86	-3.66093e-06	-9.65149e-06
1448.82	4.64585e-06	2.19241e-06	1.56569e-07		1448.34	-3.81518e-06	-9.718e-06
1449.3	4.77068e-06	2.25208e-06	1.61533e-07		1448.82	-3.87629e-06	-9.64842e-06
1449.79	4.88395e-06	2.30654e-06	1.66598e-07		1449.3	-3.80057e-06	-9.34904e-06
1450.27	4.98543e-06	2.35563e-06	1.71651e-07		1449.79	-3.57625e-06	-8.74613e-06
1450.75	5.07489e-06	2.39919e-06	1.76517e-07		1450.27	-3.23661e-06	-7.83076e-06
1451.23	5.15214e-06	2.43706e-06	1.80969e-07		1450.75	-2.86194e-06	-6.71009e-06
1451.71	5.21701e-06	2.46908e-06	1.84758e-07		1451.23	-2.55374e-06	-5.61419e-06
1452.2	5.26938e-06	2.49509e-06	1.87645e-07		1451.71	-2.39394e-06	-4.81852e-06
1452.68	5.30912e-06	2.51493e-06	1.89416e-07		1452.2	-2.40645e-06	-4.50113e-06
1453.16	5.33615e-06	2.52845e-06	1.89883e-07		1452.68	-2.55452e-06	-4.63982e-06
1453.64	5.35042e-06	2.53555e-06	1.88883e-07		1453.16	-2.76955e-06	-5.02908e-06
1454.13	5.35191e-06	2.53614e-06	1.86258e-07		1453.64	-2.99072e-06	-5.41036e-06
1454.61	5.3406e-06	2.5302e-06	1.8186e-07		1454.13	-3.18177e-06	-5.60961e-06
1455.09	5.31653e-06	2.51773e-06	1.7555e-07		1454.61	-3.32e-06	-5.59388e-06
1455.57	5.27975e-06	2.49883e-06	1.67225e-07		1455.09	-3.37226e-06	-5.43275e-06
1456.05	5.23034e-06	2.4736e-06	1.56841e-07		1455.57	-3.29468e-06	-5.23462e-06
1456.54	5.16839e-06	2.44213e-06	1.4443e-07		1456.05	-3.0623e-06	-5.10056e-06
1457.02	5.09403e-06	2.40454e-06	1.30073e-07		1456.54	-2.70731e-06	-5.09961e-06
1457.5	5.00741e-06	2.36093e-06	1.13877e-07		1457.02	-2.3237e-06	-5.25212e-06
1457.98	4.9087e-06	2.31139e-06	9.59663e-08		1457.5	-2.02406e-06	-5.52646e-06
1458.46	4.79808e-06	2.25606e-06	7.65033e-08		1457.98	-1.88094e-06	-5.85033e-06
1458.95	4.67576e-06	2.19509e-06	5.57081e-08		1458.46	-1.89811e-06	-6.14603e-06
1459.43	4.54197e-06	2.12864e-06	3.38619e-08		1458.95	-2.02791e-06	-6.36014e-06
1459.91	4.39694e-06	2.05692e-06	1.12774e-08		1459.43	-2.21256e-06	-6.47707e-06
1460.39	4.24093e-06	1.98012e-06	-1.17379e-08		1459.91	-2.40676e-06	-6.50736e-06
1460.88	4.07421e-06	1.89848e-06	-3.49033e-08		1460.39	-2.57888e-06	-6.47141e-06
1461.36	3.89706e-06	1.81221e-06	-5.79673e-08		1460.88	-2.70438e-06	-6.3879e-06
1461.84	3.70978e-06	1.72154e-06	-8.07004e-08		1461.36	-2.76466e-06	-6.27673e-06
1462.32	3.51268e-06	1.62666e-06	-1.02885e-07		1461.84	-2.75124e-06	-6.15807e-06
1462.8	3.30607e-06	1.52776e-06	-1.24305e-07		1462.32	-2.66979e-06	-6.04994e-06
1463.29	3.09028e-06	1.42497e-06	-1.44748e-07		1462.8	-2.53763e-06	-5.95861e-06
1463.77	2.86565e-06	1.31841e-06	-1.64001e-07		1463.29	-2.37887e-06	-5.87115e-06
1464.25	2.63251e-06	1.20816e-06	-1.81859e-07		1463.77	-2.21585e-06	-5.75331e-06
1464.73	2.39122e-06	1.09426e-06	-1.98129e-07		1464.25	-2.06546e-06	-5.55962e-06
1465.21	2.14213e-06	9.76788e-07	-2.12619e-07		1464.73	-1.93657e-06	-5.2481e-06
1465.7	1.8856e-06	8.55807e-07	-2.25116e-07		1465.21	-1.83171e-06	-4.80093e-06
1466.18	1.62199e-06	7.31418e-07	-2.35366e-07		1465.7	-1.74819e-06	-4.23631e-06
1466.66	1.35168e-06	6.0381e-07	-2.43069e-07		1466.18	-1.6799e-06	-3.60995e-06
1467.14	1.07503e-06	4.73357e-07	-2.4795e-07		1466.66	-1.6161e-06	-2.99784e-06
1467.63	7.92429e-07	3.40693e-07	-2.49918e-07		1467.14	-1.543e-06	-2.46527e-06
1468.11	5.04248e-07	2.06621e-07	-2.49212e-07		1467.63	-1.44231e-06	-2.03141e-06
1468.59	2.10871e-07	7.18532e-08	-2.46385e-07		1468.11	-1.29302e-06	-1.65781e-06
1469.07	-8.73183e-08	-6.31631e-08	-2.42139e-07		1468.59	-1.07283e-06	-1.26528e-06
1469.55	-3.8993e-07	-1.98231e-07	-2.37191e-07		1469.07	-7.65921e-07	-7.80628e-07
1470.04	-6.96573e-07	-3.33297e-07	-2.32208e-07		1469.55	-3.70471e-07	-1.74875e-07
1470.52	-1.00685e-06	-4.68342e-07	-2.27799e-07		1470.04	9.29003e-08	5.24443e-07
1471	-1.32034e-06	-6.03325e-07	-2.24496e-07		1470.52	5.86985e-07	1.25946e-06
1471.48	-1.63665e-06	-7.38164e-07	-2.22725e-07		1471	1.06951e-06	1.9738e-06
1471.96	-1.95534e-06	-8.72744e-07	-2.22782e-07		1471.48	1.50645e-06	2.63791e-06
1472.45	-2.276e-06	-1.00694e-06	-2.24845e-07		1471.96	1.87694e-06	3.24983e-06
1472.93	-2.59816e-06	-1.14062e-06	-2.29011e-07		1472.45	2.17076e-06	3.82636e-06
1473.41	-2.9214e-06	-1.27368e-06	-2.35335e-07		1472.93	2.37977e-06	4.38197e-06
1473.89	-3.24525e-06	-1.40604e-06	-2.43827e-07		1473.41	2.49622e-06	4.91581e-06
1474.37	-3.56924e-06	-1.53767e-06	-2.54409e-07		1473.89	2.5147e-06	5.40105e-06
1474.86	-3.89291e-06	-1.66855e-06	-2.66868e-07		1474.37	2.44142e-06	5.79275e-06
1475.34	-4.21577e-06	-1.79872e-06	-2.80846e-07		1474.86	2.30019e-06	6.04378e-06
1475.82	-4.53733e-06	-1.92811e-06	-2.95872e-07		1475.34	2.13493e-06	6.12428e-06
1476.3	-4.85711e-06	-2.05659e-06	-3.11447e-07		1475.82	2.0019e-06	6.02776e-06
1476.79	-5.17461e-06	-2.18383e-06	-3.27114e-07		1476.3	1.95799e-06	5.78851e-06
1477.27	-5.48932e-06	-2.30943e-06	-3.42527e-07		1476.79	2.0421e-06	5.50014e-06
1477.75	-5.80074e-06	-2.43294e-06	-3.57467e-07		1477.27	2.25629e-06	5.30445e-06
1478.23	-6.10836e-06	-2.55399e-06	-3.7184e-07		1477.75	2.55591e-06	5.32536e-06
1478.71	-6.41167e-06	-2.67236e-06	-3.85622e-07		1478.23	2.87227e-06	5.59858e-06
1479.2	-6.71015e-06	-2.78797e-06	-3.98814e-07		1478.71	3.14972e-06	6.05322e-06
1479.68	-7.0033e-06	-2.90086e-06	-4.11388e-07		1479.2	3.37656e-06	6.5746e-06
1480.16	-7.2906e-06	-3.01111e-06	-4.23267e-07		1479.68	3.58107e-06	7.08785e-06
1480.64	-7.57154e-06	-3.11881e-06	-4.34318e-07		1480.16	3.80204e-06	7.59081e-06
1481.12	-7.8456e-06	-3.22398e-06	-4.44374e-07		1480.64	4.05839e-06	8.11581e-06
1481.61	-8.11229e-06	-3.32651e-06	-4.53282e-07		1481.12	4.34264e-06	8.67778e-06
1482.09	-8.37108e-06	-3.42616e-06	-4.60973e-07		1481.61	4.6311e-06	9.24735e-06
1482.57	-8.62148e-06	-3.52263e-06	-4.67506e-07		1482.09	4.90028e-06	9.75466e-06
1483.05	-8.86297e-06	-3.61559e-06	-4.73069e-07		1482.57	5.13415e-06	1.01019e-05
1483.54	-9.09507e-06	-3.70483e-06	-4.77914e-07		1483.05	5.32384e-06	1.01793e-05
1484.02	-9.31727e-06	-3.79024e-06	-4.8229e-07		1483.54	5.44716e-06	9.86765e-06
1484.5	-9.5291e-06	-3.87176e-06	-4.86397e-07		1484.02	5.42421e-06	9.03946e-06
1484.98	-9.73009e-06	-3.94939e-06	-4.90376e-07		1484.5	5.07511e-06	7.60328e-06
1485.46	-9.91976e-06	-4.02312e-06	-4.94317e-07		1484.98	4.17987e-06	5.69601e-06
1485.95	-1.00977e-05	-4.0929e-06	-4.98281e-07		1485.46	2.72423e-06	3.94721e-06
1486.43	-1.02634e-05	-4.15866e-06	-5.02319e-07		1485.95	1.13112e-06	3.37589e-06
1486.91	-1.04165e-05	-4.22025e-06	-5.06502e-07		1486.43	1.03965e-07	4.72792e-06
1487.39	-1.05566e-05	-4.27753e-06	-5.10923e-07		1486.91	1.58238e-07	7.85784e-06
1487.87	-1.06832e-05	-4.33033e-06	-5.15694e-07		1487.39	1.25595e-06	1.17355e-05
1488.36	-1.07961e-05	-4.37853e-06	-5.20922e-07		1487.87	2.8518e-06	1.50997e-05
1488.84	-1.08949e-05	-4.42203e-06	-5.26688e-07		1488.36	4.31218e-06	1.72254e-05
1489.32	-1.09792e-05	-4.46077e-06	-5.33033e-07		1488.84	5.30473e-06	1.81331e-05
1489.8	-1.10488e-05	-4.49472e-06	-5.39964e-07		1489.32	5.81872e-06	1.82042e-05
1490.29	-1.11033e-05	-4.52388e-06	-5.47452e-07		1489.8	5.98738e-06	1.78025e-05
1490.77	-1.11426e-05	-4.54825e-06	-5.55418e-07		1490.29	5.95852e-06	1.71562e-05
1491.25	-1.11664e-05	-4.56787e-06	-5.63713e-07		1490.77	5.85486e-06	1.6386e-05
1491.73	-1.11746e-05	-4.58276e-06	-5.72098e-07		1491.25	5.76777e-06	1.5556e-05
1492.21	-1.11669e-05	-4.59291e-06	-5.80247e-07		1491.73	5.75773e-06	1.47323e-05
1492.7	-1.11433e-05	-4.59828e-06	-5.87776e-07		1492.21	5.84525e-06	1.40164e-05
1493.18	-1.11036e-05	-4.5987e-06	-5.94281e-07		1492.7	6.00108e-06	1.3521e-05
1493.66	-1.10478e-05	-4.59395e-06	-5.99389e-07		1493.18	6.14098e-06	1.32802e-05
1494.14	-1.09759e-05	-4.58372e-06	-6.02795e-07		1493.66	6.15031e-06	1.31879e-05
1494.62	-1.08878e-05	-4.56766e-06	-6.04286e-07		1494.14	5.9374e-06	1.30396e-05
1495.11	-1.07836e-05	-4.54553e-06	-6.03719e-07		1494.62	5.50036e-06	1.26923e-05
1495.59	-1.06635e-05	-4.51718e-06	-6.00977e-07		1495.11	4.96361e-06	1.22185e-05
1496.07	-1.05275e-05	-4.48264e-06	-5.95933e-07		1495.59	4.5479e-06	1.19097e-05
1496.55	-1.03758e-05	-4.44205e-06	-5.88443e-07		1496.07	4.46532e-06	1.20868e-05
1497.04	-1.02086e-05	-4.39563e-06	-5.78374e-07		1496.55	4.80104e-06	1.28699e-05
1497.52	-1.00262e-05	-4.34366e-06	-5.65638e-07		1497.04	5.45819e-06	1.40746e-05
1498	-9.82876e-06	-4.28643e-06	-5.50181e-07		1497.52	6.20474e-06	1.53051e-05
1498.48	-9.61672e-06	-4.22426e-06	-5.31963e-07		1498	6.78282e-06	1.61499e-05
1498.96	-9.39041e-06	-4.15739e-06	-5.10939e-07		1498.48	7.00273e-06	1.63429e-05
1499.45	-9.15023e-06	-4.08602e-06	-4.87046e-07		1498.96	6.77731e-06	1.58101e-05
1499.93	-8.89662e-06	-4.01016e-06	-4.60208e-07		1499.45	6.12706e-06	1.46661e-05
1500.41	-8.63005e-06	-3.9296e-06	-4.30365e-07		1499.93	5.1948e-06	1.31955e-05
1500.89	-8.35102e-06	-3.84395e-06	-3.97526e-07		1500.41	4.24381e-06	1.1794e-05
1501.37	-8.06007e-06	-3.7527e-06	-3.6183e-07		1500.89	3.56999e-06	1.08065e-05
1501.86	-7.75778e-06	-3.6554e-06	-3.23566e-07		1501.37	3.35365e-06	1.03496e-05
1502.34	-7.44474e-06	-3.55172e-06	-2.83135e-07		1501.86	3.55919e-06	1.02534e-05
1502.82	-7.12157e-06	-3.44145e-06	-2.41008e-07		1502.34	3.9652e-06	1.0186e-05
1503.3	-6.78895e-06	-3.32442e-06	-1.97706e-07		1502.82	4.3032e-06	9.86098e-06
1503.79	-6.44754e-06	-3.2005e-06	-1.53811e-07		1503.3	4.39353e-06	9.17873e-06
1504.27	-6.09806e-06	-3.06953e-06	-1.09999e-07		1503.79	4.18549e-06	8.21924e-06
1504.75	-5.74122e-06	-2.93144e-06	-6.70589e-08		1504.27	3.72615e-06	7.15897e-06
1505.23	-5.37778e-06	-2.78632e-06	-2.58492e-08		1504.75	3.11535e-06	6.18813e-06
1505.71	-5.00847e-06	-2.63461e-06	1.28619e-08		1505.23	2.47461e-06	5.4526e-06
1506.2	-4.63408e-06	-2.47698e-06	4.85598e-08		1505.71	1.91991e-06	5.01054e-06
1506.68	-4.25536e-06	-2.31414e-06	8.0986e-08		1506.2	1.53539e-06	4.82278e-06
1507.16	-3.8731e-06	-2.14659e-06	1.09977e-07		1506.68	1.35322e-06	4.7808e-06
1507.64	-3.48805e-06	-1.97471e-06	1.35315e-07		1507.16	1.3596e-06	4.76222e-06
1508.12	-3.101e-06	-1.79892e-06	1.56713e-07		1507.64	1.51081e-06	4.67715e-06
1508.61	-2.71271e-06	-1.6199e-06	1.73961e-07		1508.12	1.75671e-06	4.48056e-06
1509.09	-2.3239e-06	-1.43861e-06	1.87106e-07		1508.61	2.04737e-06	4.15137e-06
1509.57	-1.93533e-06	-1.25608e-06	1.96496e-07		1509.09	2.32838e-06	3.66927e-06
1510.05	-1.54771e-06	-1.07319e-06	2.02657e-07		1509.57	2.53044e-06	3.00587e-06
1510.54	-1.16172e-06	-8.90604e-07	2.06173e-07		1510.05	2.57356e-06	2.13469e-06
1511.02	-7.78043e-07	-7.08822e-07	2.07631e-07		1510.54	2.3777e-06	1.04705e-06
1511.5	-3.97318e-07	-5.28242e-07	2.07623e-07		1511.02	1.89276e-06	-2.3044e-07
1511.98	-2.01628e-08	-3.49216e-07	2.06745e-07		1511.5	1.13154e-06	-1.61639e-06
1512.46	3.52836e-07	-1.7209e-07	2.05556e-07		1511.98	2.04675e-07	-2.95638e-06
1512.95	7.21123e-07	2.77807e-09	2.04537e-07		1512.46	-6.8323e-07	-4.05297e-06
1513.43	1.08418e-06	1.74998e-07	2.04049e-07		1512.95	-1.30365e-06	-4.75008e-06
1513.91	1.44151e-06	3.44138e-07	2.04334e-07		1513.43	-1.51319e-06	-5.02307e-06
1514.39	1.79267e-06	5.09723e-07	2.0553e-07		1513.91	-1.31792e-06	-4.98917e-06
1514.87	2.13726e-06	6.71242e-07	2.07686e-07		1514.39	-8.51e-07	-4.82679e-06
1515.36	2.47489e-06	8.28179e-07	2.1079e-07		1514.87	-2.81514e-07	-4.66204e-06
1515.84	2.80525e-06	9.80068e-07	2.1479e-07		1515.36	2.60921e-07	-4.5254e-06
1516.32	3.12805e-06	1.12653e-06	2.1962e-07		1515.84	6.96522e-07	-4.39836e-06
1516.8	3.44305e-06	1.26728e-06	2.25198e-07		1516.32	9.56336e-07	-4.30156e-06
1517.29	3.75005e-06	1.40209e-06	2.31433e-07		1516.8	9.52113e-07	-4.34127e-06
1517.77	4.04892e-06	1.53071e-06	2.38237e-07		1517.29	5.765e-07	-4.6934e-06
1518.25	4.33954e-06	1.65277e-06	2.45545e-07		1517.77	-2.5945e-07	-5.51919e-06
1518.73	4.62186e-06	1.76781e-06	2.53338e-07		1518.25	-1.54501e-06	-6.83875e-06
1519.21	4.89587e-06	1.87538e-06	2.61581e-07		1518.73	-3.07151e-06	-8.43111e-06
1519.7	5.16161e-06	1.97531e-06	2.70045e-07		1519.21	-4.44612e-06	-9.89696e-06
1520.18	5.41913e-06	2.06798e-06	2.78195e-07		1519.7	-5.27983e-06	-1.08857e-05
1520.66	5.66857e-06	2.1542e-06	2.85348e-07		1520.18	-5.42574e-06	-1.13227e-05
1521.14	5.91009e-06	2.23497e-06	2.90929e-07		1520.66	-5.06617e-06	-1.14333e-05
1521.62	6.14388e-06	2.31123e-06	2.94549e-07		1521.14	-4.57675e-06	-1.15548e-05
1522.11	6.37016e-06	2.38383e-06	2.95962e-07		1521.62	-4.27579e-06	-1.18848e-05
1522.59	6.58922e-06	2.45347e-06	2.95019e-07		1522.11	-4.27839e-06	-1.23858e-05
1523.07	6.80133e-06	2.52066e-06	2.9168e-07		1522.59	-4.53142e-06	-1.28767e-05
1523.55	7.0068e-06	2.58567e-06	2.86051e-07		1523.07	-4.92841e-06	-1.31916e-05
1524.04	7.20598e-06	2.64866e-06	2.7839e-07		1523.55	-5.38706e-06	-1.32702e-05
1524.52	7.39922e-06	2.7097e-06	2.69068e-07		1524.04	-5.86887e-06	-1.31472e-05
1525	7.58688e-06	2.7688e-06	2.58513e-07		1524.52	-6.34124e-06	-1.28382e-05
1525.48	7.76935e-06	2.82599e-06	2.47169e-07		1525	-6.70166e-06	-1.21991e-05
1525.96	7.947e-06	2.88131e-06	2.35477e-07		1525.48	-6.70403e-06	-1.0899e-05
1526.45	8.12024e-06	2.93486e-06	2.23878e-07		1525.96	-6.00936e-06	-8.68399e-06
1526.93	8.28944e-06	2.98683e-06	2.12824e-07		1526.45	-4.46252e-06	-5.85183e-06
1527.41	8.45502e-06	3.03744e-06	2.02786e-07		1526.93	-2.40267e-06	-3.37651e-06
1527.89	8.61736e-06	3.08692e-06	1.94267e-07		1527.41	-5.84068e-07	-2.32569e-06
1528.37	8.77683e-06	3.13549e-06	1.87785e-07		1527.89	2.90471e-07	-3.10045e-06
1528.86	8.93382e-06	3.18335e-06	1.83831e-07		1528.37	2.76407e-08	-5.17483e-06
1529.34	9.08867e-06	3.23069e-06	1.82817e-07		1528.86	-9.75615e-07	-7.52744e-06
1529.82	9.24171e-06	3.2777e-06	1.85007e-07		1529.34	-2.08447e-06	-9.35263e-06
1530.3	9.39328e-06	3.32462e-06	1.9048e-07		1529.82	-2.85358e-06	-1.03749e-05
1530.78	9.54366e-06	3.3718e-06	1.99137e-07		1530.3	-3.14541e-06	-1.06295e-05
1531.27	9.69312e-06	3.41962e-06	2.10752e-07		1530.78	-3.02535e-06	-1.02272e-05
1531.75	9.8419e-06	3.46849e-06	2.25041e-07		1531.27	-2.65162e-06	-9.32224e-06
1532.23	9.99021e-06	3.51876e-06	2.41744e-07		1531.75	-2.213e-06	-8.1567e-06
1532.71	1.01382e-05	3.57068e-06	2.60673e-07		1532.23	-1.8833e-06	-7.04537e-06
1533.2	1.02861e-05	3.62449e-06	2.81716e-07		1532.71	-1.77591e-06	-6.29267e-06
1533.68	1.04339e-05	3.68037e-06	3.04802e-07		1533.2	-1.90716e-06	-6.07654e-06
1534.16	1.05817e-05	3.7385e-06	3.29858e-07		1533.68	-2.18675e-06	-6.36421e-06
1534.64	1.07295e-05	3.79901e-06	3.56795e-07		1534.16	-2.43969e-06	-6.8969e-06
1535.12	1.08773e-05	3.86194e-06	3.85517e-07		1534.64	-2.46007e-06	-7.28046e-06
1535.61	1.10251e-05	3.92728e-06	4.15947e-07		1535.12	-2.07641e-06	-7.1331e-06
1536.09	1.11727e-05	3.99502e-06	4.48011e-07		1535.61	-1.21575e-06	-6.2313e-06
1536.57	1.13199e-05	4.06522e-06	4.81595e-07		1536.09	3.33746e-08	-4.57345e-06
1537.05	1.14667e-05	4.13808e-06	5.16492e-07		1536.57	1.33259e-06	-2.37901e-06
1537.53	1.16127e-05	4.21395e-06	5.52374e-07		1537.05	2.01281e-06	-1.74749e-07
1538.02	1.17576e-05	4.29324e-06	5.888e-07		1537.53	1.26429e-06	1.02924e-06
1538.5	1.19012e-05	4.37633e-06	6.25252e-07		1538.02	-1.22026e-06	9.68779e-08
1538.98	1.20431e-05	4.4634e-06	6.61208e-07		1538.5	-4.80493e-06	-3.3534e-06
1539.46	1.21829e-05	4.55451e-06	6.96201e-07		1538.98	-8.22392e-06	-8.47829e-06
1539.95	1.23201e-05	4.64963e-06	7.29847e-07		1539.46	-1.03532e-05	-1.3606e-05
1540.43	1.24544e-05	4.74869e-06	7.61811e-07		1539.95	-1.08384e-05	-1.72082e-05
1540.91	1.25851e-05	4.8515e-06	7.91749e-07		1540.43	-1.00941e-05	-1.87651e-05
1541.39	1.27117e-05	4.95765e-06	8.193e-07		1540.91	-8.74763e-06	-1.87235e-05
1541.87	1.28338e-05	5.06648e-06	8.44124e-07		1541.39	-7.27014e-06	-1.78383e-05
1542.36	1.29506e-05	5.17706e-06	8.65978e-07		1541.87	-5.99108e-06	-1.67273e-05
1542.84	1.30616e-05	5.28838e-06	8.84774e-07		1542.36	-5.13326e-06	-1.57496e-05
1543.32	1.31662e-05	5.3994e-06	9.00578e-07		1542.84	-4.77459e-06	-1.50274e-05
1543.8	1.32636e-05	5.50907e-06	9.13582e-07		1543.32	-4.84889e-06	-1.45726e-05
1544.28	1.33533e-05	5.61633e-06	9.24074e-07		1543.8	-5.21562e-06	-1.44135e-05
1544.77	1.34346e-05	5.72e-06	9.32438e-07		1544.28	-5.73082e-06	-1.46101e-05
1545.25	1.35068e-05	5.81885e-06	9.39179e-07		1544.77	-6.2587e-06	-1.515e-05
1545.73	1.35693e-05	5.91169e-06	9.44936e-07		1545.25	-6.66149e-06	-1.5868e-05
1546.21	1.36214e-05	5.9975e-06	9.50454e-07		1545.73	-6.81875e-06	-1.64835e-05
1546.7	1.36626e-05	6.07565e-06	9.56421e-07		1546.21	-6.67477e-06	-1.672e-05
1547.18	1.36921e-05	6.1459e-06	9.63272e-07		1546.7	-6.27105e-06	-1.6408e-05
1547.66	1.37093e-05	6.20818e-06	9.71122e-07		1547.18	-5.7449e-06	-1.55548e-05
1548.14	1.37138e-05	6.26235e-06	9.79866e-07		1547.66	-5.29649e-06	-1.43975e-05
1548.62	1.37049e-05	6.30808e-06	9.8932e-07		1548.14	-5.1373e-06	-1.34045e-05
1549.11	1.3682e-05	6.34495e-06	9.99292e-07		1548.62	-5.4052e-06	-1.31247e-05
1549.59	1.36448e-05	6.37246e-06	1.0096e-06		1549.11	-6.09073e-06	-1.39016e-05
1550.07	1.35927e-05	6.39011e-06	1.02005e-06		1549.59	-7.02597e-06	-1.56441e-05
1550.55	1.35253e-05	6.39746e-06	1.03044e-06		1550.07	-7.96153e-06	-1.7854e-05
1551.03	1.34422e-05	6.39414e-06	1.04053e-06		1550.55	-8.68008e-06	-1.98955e-05
1551.52	1.3343e-05	6.3798e-06	1.05007e-06		1551.03	-9.06864e-06	-2.12982e-05
1552	1.32275e-05	6.35415e-06	1.05878e-06		1551.52	-9.09895e-06	-2.18742e-05
1552.48	1.30954e-05	6.31691e-06	1.06634e-06		1552	-8.77269e-06	-2.16401e-05
1552.96	1.29464e-05	6.26783e-06	1.07247e-06		1552.48	-8.09651e-06	-2.06932e-05
1553.45	1.27805e-05	6.20666e-06	1.07685e-06		1552.96	-7.12454e-06	-1.916e-05
1553.93	1.25975e-05	6.1332e-06	1.07918e-06		1553.45	-6.01518e-06	-1.71976e-05
1554.41	1.23973e-05	6.04733e-06	1.07921e-06		1553.93	-5.03641e-06	-1.50241e-05
1554.89	1.218e-05	5.94901e-06	1.07668e-06		1554.41	-4.49502e-06	-1.29749e-05
1555.37	1.19457e-05	5.8384e-06	1.07132e-06		1554.89	-4.6235e-06	-1.15292e-05
1555.86	1.16943e-05	5.71588e-06	1.06286e-06		1555.37	-5.46385e-06	-1.11766e-05
1556.34	1.14262e-05	5.58214e-06	1.05097e-06		1555.86	-6.8278e-06	-1.2136e-05
1556.82	1.11416e-05	5.43816e-06	1.0352e-06		1556.34	-8.36502e-06	-1.41406e-05
1557.3	1.08406e-05	5.28506e-06	1.0151e-06		1556.82	-9.7075e-06	-1.65053e-05
1557.78	1.05238e-05	5.12382e-06	9.90389e-07		1557.3	-1.05999e-05	-1.84596e-05
1558.27	1.01914e-05	4.95491e-06	9.61125e-07		1557.78	-1.09434e-05	-1.94965e-05
1558.75	9.84395e-06	4.7784e-06	9.27638e-07		1558.27	-1.0729e-05	-1.94727e-05
1559.23	9.48187e-06	4.59427e-06	8.90263e-07		1558.75	-9.95316e-06	-1.84921e-05
1559.71	9.10571e-06	4.40275e-06	8.49204e-07		1559.23	-8.63233e-06	-1.67909e-05
1560.2	8.71605e-06	4.20432e-06	8.04591e-07		1559.71	-6.9196e-06	-1.47273e-05
1560.68	8.3135e-06	3.99954e-06	7.56698e-07		1560.2	-5.16052e-06	-1.27342e-05
1561.16	7.89872e-06	3.78871e-06	7.06118e-07		1560.68	-3.76476e-06	-1.11523e-05
1561.64	7.4724e-06	3.57191e-06	6.53647e-07		1561.16	-2.97229e-06	-1.00459e-05
1562.12	7.03526e-06	3.34918e-06	6.0002e-07		1561.64	-2.72353e-06	-9.19508e-06
1562.61	6.58805e-06	3.12064e-06	5.45792e-07		1562.12	-2.74284e-06	-8.29169e-06
1563.09	6.13156e-06	2.88653e-06	4.91357e-07		1562.61	-2.76219e-06	-7.20252e-06
1563.57	5.66658e-06	2.64712e-06	4.37011e-07		1563.09	-2.67126e-06	-6.05877e-06
1564.05	5.19395e-06	2.40275e-06	3.82991e-07		1563.57	-2.49954e-06	-5.13293e-06
1564.53	4.7145e-06	2.15374e-06	3.29505e-07		1564.05	-2.31285e-06	-4.62611e-06
1565.02	4.22909e-06	1.90048e-06	2.76728e-07		1564.53	-2.14252e-06	-4.53173e-06
1565.5	3.7386e-06	1.64341e-06	2.248e-07		1565.02	-1.97125e-06	-4.63106e-06
1565.98	3.24391e-06	1.38308e-06	1.7381e-07		1565.5	-1.7625e-06	-4.61677e-06
1566.46	2.7459e-06	1.12012e-06	1.23785e-07		1565.98	-1.49651e-06	-4.25749e-06
1566.95	2.24546e-06	8.553e-07	7.46876e-08		1566.46	-1.19079e-06	-3.51163e-06
1567.43	1.74346e-06	5.89437e-07	2.64253e-08		1566.95	-8.86438e-07	-2.5162e-06
1567.91	1.24079e-06	3.23396e-07	-2.11322e-08		1567.43	-6.14463e-07	-1.48253e-06
1568.39	7.38308e-07	5.80273e-08	-6.81303e-08		1567.91	-3.63615e-07	-5.71487e-07
1568.87	2.3686e-07	-2.05878e-07	-1.14717e-07		1568.39	-7.56773e-08	1.80311e-07
1569.36	-2.62725e-07	-4.67622e-07	-1.61042e-07		1568.87	3.26323e-07	8.61821e-07
1569.84	-7.59639e-07	-7.26594e-07	-2.0726e-07		1569.36	8.88325e-07	1.62573e-06
1570.32	-1.2531e-06	-9.82245e-07	-2.53524e-07		1569.84	1.58795e-06	2.5965e-06
1570.8	-1.74236e-06	-1.23407e-06	-2.99946e-07		1570.32	2.33146e-06	3.78601e-06
1571.28	-2.22669e-06	-1.48162e-06	-3.46561e-07		1570.8	2.99422e-06	5.07321e-06
1571.77	-2.7054e-06	-1.72453e-06	-3.93296e-07		1571.28	3.482e-06	6.2596e-06
1572.25	-3.17785e-06	-1.96247e-06	-4.39972e-07		1571.77	3.77654e-06	7.18046e-06
1572.73	-3.64342e-06	-2.19516e-06	-4.8636e-07		1572.25	3.93613e-06	7.79024e-06
1573.21	-4.10155e-06	-2.42225e-06	-5.32246e-07		1572.73	4.06042e-06	8.17993e-06
1573.7	-4.55171e-06	-2.64332e-06	-5.775e-07		1573.21	4.23882e-06	8.52231e-06
1574.18	-4.99343e-06	-2.85791e-06	-6.22084e-07		1573.7	4.50829e-06	8.99059e-06
1574.66	-5.42627e-06	-3.06562e-06	-6.66027e-07		1574.18	4.83793e-06	9.68016e-06
1575.14	-5.84986e-06	-3.26616e-06	-7.09367e-07		1574.66	5.14319e-06	1.05781e-05
1575.62	-6.26386e-06	-3.45939e-06	-7.52113e-07		1575.14	5.31774e-06	1.15714e-05
1576.11	-6.668e-06	-3.64532e-06	-7.94236e-07		1575.62	5.27053e-06	1.25009e-05
1576.59	-7.06203e-06	-3.824e-06	-8.3568e-07		1576.11	4.93778e-06	1.32044e-05
1577.07	-7.44578e-06	-3.9954e-06	-8.76381e-07		1576.59	4.26971e-06	1.35092e-05
1577.55	-7.81911e-06	-4.15948e-06	-9.16275e-07		1577.07	3.22802e-06	1.31621e-05
1578.03	-8.18193e-06	-4.31622e-06	-9.553e-07		1577.55	1.88323e-06	1.18241e-05
1578.52	-8.5342e-06	-4.46586e-06	-9.93359e-07		1578.03	6.32904e-07	9.36039e-06
1579	-8.87593e-06	-4.60879e-06	-1.03029e-06		1578.52	2.22866e-07	6.38788e-06
1579.48	-9.20717e-06	-4.74551e-06	-1.06583e-06		1579	1.20875e-06	4.23318e-06
1579.96	-9.52802e-06	-4.87641e-06	-1.0997e-06		1579.48	3.39874e-06	4.044e-06
1580.45	-9.8386e-06	-5.00175e-06	-1.13162e-06		1579.96	5.91682e-06	5.96134e-06
1580.93	-1.01391e-05	-5.12174e-06	-1.1614e-06		1580.45	7.80046e-06	9.06669e-06
1581.41	-1.04297e-05	-5.23655e-06	-1.18895e-06		1580.93	8.6421e-06	1.2095e-05
1581.89	-1.07106e-05	-5.34634e-06	-1.21422e-06		1581.41	8.70988e-06	1.43146e-05
1582.37	-1.09822e-05	-5.45121e-06	-1.2372e-06		1581.89	8.45219e-06	1.56493e-05
1582.86	-1.12447e-05	-5.55115e-06	-1.25791e-06		1582.37	8.1012e-06	1.6205e-05
1583.34	-1.14984e-05	-5.64601e-06	-1.27637e-06		1582.86	7.70302e-06	1.60323e-05
1583.82	-1.17436e-05	-5.73555e-06	-1.29265e-06		1583.34	7.26529e-06	1.52138e-05
1584.3	-1.19808e-05	-5.81946e-06	-1.30686e-06		1583.82	6.82927e-06	1.39731e-05
1584.78	-1.22102e-05	-5.89753e-06	-1.31916e-06		1584.3	6.47232e-06	1.2695e-05
1585.27	-1.24322e-05	-5.96973e-06	-1.32976e-06		1584.78	6.27124e-06	1.18224e-05
1585.75	-1.26472e-05	-6.03622e-06	-1.33888e-06		1585.27	6.25216e-06	1.16806e-05
1586.23	-1.28556e-05	-6.09733e-06	-1.34671e-06		1585.75	6.36159e-06	1.23215e-05
1586.71	-1.30577e-05	-6.15348e-06	-1.35343e-06		1586.23	6.48356e-06	1.34905e-05
1587.19	-1.32539e-05	-6.20509e-06	-1.35913e-06		1586.71	6.49571e-06	1.47319e-05
1587.68	-1.34446e-05	-6.2525e-06	-1.36388e-06		1587.19	6.32783e-06	1.55707e-05
1588.16	-1.36301e-05	-6.29596e-06	-1.36773e-06		1587.68	5.98794e-06	1.56618e-05
1588.64	-1.38107e-05	-6.33562e-06	-1.37073e-06		1588.16	5.55557e-06	1.48791e-05
1589.12	-1.39867e-05	-6.3716e-06	-1.37298e-06		1588.64	5.15827e-06	1.33705e-05
1589.61	-1.41583e-05	-6.40399e-06	-1.37466e-06		1589.12	4.94504e-06	1.15754e-05
1590.09	-1.43259e-05	-6.433e-06	-1.37601e-06		1589.61	5.03578e-06	1.01101e-05
1590.57	-1.44895e-05	-6.45887e-06	-1.37729e-06		1590.09	5.46398e-06	9.51584e-06
1591.05	-1.46493e-05	-6.48192e-06	-1.37879e-06		1590.57	6.15631e-06	1.00065e-05
1591.53	-1.48055e-05	-6.5025e-06	-1.38072e-06		1591.05	6.97198e-06	1.14079e-05
1592.02	-1.49581e-05	-6.52096e-06	-1.38324e-06		1591.53	7.7757e-06	1.33206e-05
1592.5	-1.5107e-05	-6.53765e-06	-1.3864e-06		1592.02	8.48363e-06	1.53555e-05
1592.98	-1.52523e-05	-6.55292e-06	-1.39019e-06		1592.5	9.04269e-06	1.72452e-05
1593.46	-1.53939e-05	-6.56713e-06	-1.39452e-06		1592.98	9.38161e-06	1.87976e-05
1593.94	-1.55315e-05	-6.58062e-06	-1.39925e-06		1593.46	9.3811e-06	1.97965e-05
1594.43	-1.56649e-05	-6.59373e-06	-1.4042e-06		1593.94	8.89824e-06	1.99746e-05
1594.91	-1.57939e-05	-6.60672e-06	-1.40922e-06		1594.43	7.85204e-06	1.9098e-05
1595.39	-1.5918e-05	-6.61971e-06	-1.41411e-06		1594.91	6.34946e-06	1.71551e-05
1595.87	-1.60369e-05	-6.63266e-06	-1.41869e-06		1595.39	4.76596e-06	1.45486e-05
1596.36	-1.61501e-05	-6.64536e-06	-1.42278e-06		1595.87	3.65896e-06	1.20968e-05
1596.84	-1.6257e-05	-6.65763e-06	-1.42621e-06		1596.36	3.48643e-06	1.07013e-05
1597.32	-1.6357e-05	-6.66954e-06	-1.4288e-06		1596.84	4.32478e-06	1.0854e-05
1597.8	-1.64494e-05	-6.68158e-06	-1.43023e-06		1597.32	5.81104e-06	1.23475e-05
1598.28	-1.65335e-05	-6.69461e-06	-1.43007e-06		1597.8	7.3683e-06	1.44341e-05
1598.77	-1.66085e-05	-6.70953e-06	-1.42795e-06		1598.28	8.52733e-06	1.62923e-05
1599.25	-1.66736e-05	-6.72675e-06	-1.42376e-06		1598.77	9.10665e-06	1.74385e-05
1599.73	-1.67278e-05	-6.74619e-06	-1.4177e-06		1599.25	9.1626e-06	1.78088e-05
1600.21	-1.67702e-05	-6.76738e-06	-1.41003e-06		1599.73	8.83593e-06	1.75818e-05
1600.69	-1.67998e-05	-6.78974e-06	-1.401e-06		1600.21	8.23102e-06	1.69568e-05
1601.18	-1.68155e-05	-6.81262e-06	-1.39076e-06		1600.69	7.39034e-06	1.60516e-05
1601.66	-1.68163e-05	-6.83529e-06	-1.37944e-06		1601.18	6.34441e-06	1.4928e-05
1602.14	-1.6801e-05	-6.85703e-06	-1.36708e-06		1601.66	5.20389e-06	1.37038e-05
1602.62	-1.67685e-05	-6.87702e-06	-1.35369e-06		1602.14	4.20583e-06	1.2631e-05
1603.11	-1.67176e-05	-6.89443e-06	-1.33927e-06		1602.62	3.65032e-06	1.20433e-05
1603.59	-1.66472e-05	-6.90838e-06	-1.32374e-06		1603.11	3.74176e-06	1.21746e-05
1604.07	-1.65562e-05	-6.91795e-06	-1.30703e-06		1603.59	4.45143e-06	1.29884e-05
1604.55	-1.64432e-05	-6.92224e-06	-1.28901e-06		1604.07	5.50275e-06	1.41516e-05
1605.03	-1.63073e-05	-6.92037e-06	-1.26956e-06		1604.55	6.49939e-06	1.51872e-05
1605.52	-1.61472e-05	-6.91148e-06	-1.24855e-06		1605.03	7.09803e-06	1.56881e-05
1606	-1.59619e-05	-6.8948e-06	-1.22581e-06		1605.52	7.13575e-06	1.54839e-05
1606.48	-1.57503e-05	-6.86964e-06	-1.2012e-06		1606	6.67371e-06	1.47055e-05
1606.96	-1.55114e-05	-6.83534e-06	-1.17456e-06		1606.48	5.9705e-06	1.37571e-05
1607.44	-1.52443e-05	-6.79127e-06	-1.14577e-06		1606.96	5.38367e-06	1.31691e-05
1607.93	-1.4948e-05	-6.73669e-06	-1.11479e-06		1607.44	5.22072e-06	1.33667e-05
1608.41	-1.46217e-05	-6.67076e-06	-1.08162e-06		1607.93	5.59844e-06	1.44475e-05
1608.89	-1.42648e-05	-6.59254e-06	-1.04627e-06		1608.41	6.39905e-06	1.61285e-05
1609.37	-1.38765e-05	-6.50108e-06	-1.00875e-06		1608.89	7.35137e-06	1.79002e-05
1609.86	-1.34564e-05	-6.39541e-06	-9.69019e-07		1609.37	8.18634e-06	1.92962e-05
1610.34	-1.30038e-05	-6.27462e-06	-9.27034e-07		1609.86	8.76263e-06	2.0102e-05
1610.82	-1.25186e-05	-6.13776e-06	-8.82691e-07		1610.34	9.10488e-06	2.04039e-05
1611.3	-1.20005e-05	-5.98394e-06	-8.35847e-07		1610.82	9.34558e-06	2.0482e-05
1611.78	-1.14493e-05	-5.81226e-06	-7.86306e-07		1611.3	9.62592e-06	2.06406e-05
1612.27	-1.08652e-05	-5.62193e-06	-7.33834e-07		1611.78	1.0002e-05	2.10496e-05
1612.75	-1.02482e-05	-5.41233e-06	-6.78191e-07		1612.27	1.03928e-05	2.16656e-05
[truncated: 4,952 more rows]

## Sheet: Figure 4C
Figure 4C:Thermostability evaluations of Formulated MS-Hu6 by Nano Differential Scanning Calorimetry
Formulation (100 mg/mL)		Formulation (50 mg/mL)
Temp (°C)	Specific heat capacity, Cp (kJ/mol.K)	Temp (°C)	Specific heat capacity, Cp (kJ/mol.K)
56.6993	0.219511	55.4802	0.0672308
56.7326	0.222951	55.5136	0.0684036
56.766	0.226444	55.5469	0.0695969
56.7993	0.229991	55.5802	0.0708104
56.8326	0.233592	55.6135	0.0720449
56.866	0.23725	55.6469	0.0733005
56.8993	0.240965	55.6802	0.0745778
56.9327	0.244735	55.7135	0.0758775
56.966	0.248565	55.7469	0.0771991
56.9993	0.252452	55.7802	0.0785434
57.0326	0.2564	55.8135	0.0799109
57.066	0.260409	55.8469	0.0813018
57.0993	0.264479	55.8802	0.0827171
57.1326	0.268611	55.9135	0.0841563
57.166	0.272807	55.9469	0.0856202
57.1993	0.277068	55.9802	0.0871096
57.2326	0.281395	56.0135	0.0886242
57.266	0.285788	56.0469	0.0901648
57.2993	0.290249	56.0802	0.0917319
57.3327	0.294779	56.1135	0.0933258
57.366	0.299378	56.1469	0.0949475
57.3993	0.304048	56.1802	0.0965966
57.4327	0.308788	56.2135	0.0982739
57.466	0.313603	56.2469	0.09998
57.4993	0.318491	56.2802	0.101716
57.5327	0.323453	56.3135	0.103481
57.566	0.328491	56.3469	0.105277
57.5993	0.333608	56.3802	0.107103
57.6327	0.338802	56.4135	0.10896
57.666	0.344075	56.4469	0.110849
57.6993	0.349431	56.4802	0.112771
57.7327	0.354867	56.5135	0.114726
57.766	0.360386	56.5469	0.116714
57.7993	0.365989	56.5802	0.118736
57.8327	0.37168	56.6135	0.120793
57.866	0.377457	56.6469	0.122884
57.8993	0.383321	56.6802	0.125012
57.9327	0.389277	56.7135	0.127176
57.966	0.395321	56.7469	0.129377
57.9993	0.40146	56.7802	0.131615
58.0327	0.407691	56.8136	0.133892
58.066	0.414017	56.8469	0.136207
58.0993	0.42044	56.8802	0.138562
58.1327	0.426963	56.9136	0.140957
58.166	0.433583	56.9469	0.143392
58.1993	0.440302	56.9802	0.145869
58.2326	0.447128	57.0136	0.148389
58.266	0.454055	57.0469	0.150952
58.2993	0.461088	57.0802	0.153558
58.3327	0.46823	57.1136	0.156209
58.366	0.475479	57.1469	0.158905
58.3993	0.482838	57.1802	0.161646
58.4327	0.490311	57.2136	0.164434
58.466	0.497896	57.2469	0.167269
58.5027	0.506373	57.2802	0.170153
58.536	0.514202	57.3136	0.173087
58.5693	0.522149	57.3469	0.176069
58.6026	0.530217	57.3802	0.179102
58.636	0.538408	57.4135	0.182186
58.6693	0.54672	57.4469	0.185323
58.7026	0.555164	57.4802	0.188513
58.736	0.563732	57.5135	0.191758
58.7693	0.572431	57.5469	0.195058
58.8026	0.581262	57.5802	0.198413
58.8359	0.590226	57.6135	0.201826
58.8693	0.599329	57.6469	0.205296
58.9026	0.608566	57.6802	0.208826
58.936	0.617947	57.7135	0.212415
58.9693	0.627466	57.7502	0.216433
59.0026	0.637129	57.7835	0.220151
59.0359	0.646938	57.8168	0.223932
59.0693	0.656899	57.8502	0.227777
59.1026	0.66701	57.8835	0.231688
59.136	0.67727	57.9168	0.235664
59.1693	0.687685	57.9502	0.239706
59.2026	0.698261	57.9835	0.243819
59.236	0.708992	58.0168	0.248001
59.2693	0.719889	58.0502	0.252253
59.3026	0.73095	58.0835	0.256578
59.336	0.742175	58.1168	0.260974
59.3693	0.753571	58.1502	0.265447
59.4026	0.765136	58.1835	0.269993
59.436	0.776878	58.2168	0.274617
59.4693	0.788793	58.2502	0.279318
59.5026	0.800887	58.2835	0.284099
59.536	0.813167	58.3168	0.288961
59.5693	0.825627	58.3502	0.293905
59.6026	0.838279	58.3835	0.298931
59.636	0.85112	58.4168	0.304042
59.6693	0.864149	58.4502	0.309241
59.7027	0.877378	58.4835	0.314526
59.736	0.890802	58.5168	0.319898
59.7693	0.904426	58.5501	0.325362
59.8026	0.918254	58.5835	0.330918
59.836	0.93229	58.6168	0.336568
59.8693	0.946535	58.6501	0.342312
59.9026	0.960993	58.6835	0.348153
59.936	0.975667	58.7168	0.354092
59.9693	0.990561	58.7501	0.360131
60.0026	1.00568	58.7835	0.366273
60.036	1.02102	58.8168	0.372516
60.0693	1.03659	58.8501	0.378866
60.1026	1.0524	58.8835	0.385321
60.136	1.06843	58.9168	0.391885
60.1693	1.08471	58.9501	0.39856
60.2026	1.10123	58.9835	0.405347
60.236	1.11799	59.0168	0.412245
60.2693	1.13501	59.0502	0.419261
60.3026	1.15228	59.0835	0.426392
60.3359	1.1698	59.1168	0.433645
60.3693	1.18759	59.1502	0.441019
60.4026	1.20565	59.1835	0.448514
60.436	1.22396	59.2168	0.456134
60.4693	1.24256	59.2502	0.463884
60.5026	1.26142	59.2835	0.471764
60.536	1.28057	59.3168	0.479773
60.5693	1.29999	59.3502	0.487918
60.6026	1.31971	59.3835	0.496196
60.636	1.33971	59.4168	0.504615
60.6693	1.36001	59.4502	0.513174
60.7026	1.38062	59.4835	0.521877
60.736	1.40152	59.5168	0.530721
60.7693	1.42274	59.5502	0.539713
60.8026	1.44427	59.5835	0.548854
60.836	1.46611	59.6168	0.558148
60.8693	1.48828	59.6502	0.567596
60.9026	1.51077	59.6835	0.577201
60.936	1.5336	59.7168	0.586969
60.9693	1.55676	59.7502	0.596896
61.0026	1.58026	59.7835	0.606988
61.036	1.6041	59.8168	0.617248
61.0693	1.62829	59.8502	0.627677
61.1026	1.65285	59.8835	0.63828
61.136	1.67775	59.9168	0.649059
61.1693	1.70303	59.9502	0.660016
61.2026	1.72867	59.9835	0.671155
61.236	1.7547	60.0168	0.682475
61.2693	1.7811	60.0501	0.693986
61.3026	1.80789	60.0835	0.705687
61.336	1.83506	60.1168	0.717582
61.3693	1.86263	60.1501	0.729673
61.4026	1.8906	60.1835	0.741968
61.436	1.91898	60.2168	0.754462
61.4693	1.94777	60.2501	0.767162
61.5026	1.97699	60.2835	0.780072
61.5359	2.00662	60.3168	0.793195
61.5693	2.0367	60.3501	0.806535
61.6026	2.0672	60.3834	0.820094
61.636	2.09815	60.4168	0.833881
61.6693	2.12955	60.4501	0.84789
61.7026	2.16139	60.4834	0.862135
61.736	2.19371	60.5168	0.876613
61.7693	2.22649	60.5501	0.89133
61.8026	2.25974	60.5835	0.906293
61.8359	2.29347	60.6168	0.921498
61.8693	2.32768	60.6502	0.936952
61.9026	2.36239	60.6835	0.952659
61.9359	2.3976	60.7168	0.968625
61.9693	2.43333	60.7502	0.984847
62.0026	2.46955	60.7835	1.00133
62.0359	2.5063	60.8168	1.0181
62.0693	2.54358	60.8502	1.03513
62.1026	2.58139	60.8835	1.05245
62.1359	2.61974	60.9168	1.07004
62.1693	2.65864	60.9502	1.08793
62.2026	2.6981	60.9835	1.1061
62.2359	2.73812	61.0168	1.12457
62.2692	2.77871	61.0502	1.14335
62.3026	2.81988	61.0835	1.16242
62.3359	2.86163	61.1168	1.18182
62.3692	2.90398	61.1502	1.20151
62.4026	2.94695	61.1835	1.22154
62.4359	2.99051	61.2168	1.24189
62.4693	3.0347	61.2502	1.26257
62.5026	3.07951	61.2835	1.28359
62.5359	3.12495	61.3168	1.30495
62.5692	3.17104	61.3502	1.32665
62.6026	3.21778	61.3835	1.3487
62.6359	3.26517	61.4168	1.37112
62.6692	3.31325	61.4502	1.39389
62.7026	3.36198	61.4835	1.41703
62.7359	3.41142	61.5168	1.44055
62.7692	3.46154	61.5501	1.46445
62.8026	3.51236	61.5835	1.48874
62.8359	3.5639	61.6168	1.51342
62.8693	3.61616	61.6501	1.53849
62.9026	3.66916	61.6835	1.56396
62.9359	3.72288	61.7168	1.58986
62.9693	3.77737	61.7501	1.61616
63.0059	3.83818	61.7835	1.64289
63.0393	3.89426	61.8168	1.67005
63.0726	3.95111	61.8501	1.69764
63.1059	4.00878	61.8835	1.72568
63.1393	4.06724	61.9168	1.75416
63.1726	4.12651	61.9501	1.7831
63.2059	4.18658	61.9835	1.8125
63.2393	4.2475	62.0168	1.84238
63.2726	4.30924	62.0501	1.87273
63.306	4.37185	62.0835	1.90357
63.3393	4.4353	62.1168	1.9349
63.3726	4.49962	62.1501	1.96672
63.4059	4.56482	62.1835	1.99905
63.4393	4.63089	62.2168	2.0319
63.4726	4.69788	62.2501	2.06527
63.5059	4.76579	62.2835	2.09917
63.5393	4.83462	62.3168	2.1336
63.5726	4.90439	62.3501	2.1686
63.6059	4.97511	62.3835	2.20413
63.6392	5.0468	62.4168	2.24022
63.6726	5.11944	62.4501	2.2769
63.7059	5.19307	62.4835	2.31415
63.7392	5.26768	62.5168	2.35199
63.7726	5.3433	62.5501	2.39042
63.8059	5.41994	62.5835	2.42946
63.8392	5.49762	62.6168	2.46912
63.8726	5.57635	62.6501	2.50939
63.9059	5.65611	62.6835	2.55029
63.9392	5.73692	62.7168	2.59183
63.9726	5.81884	62.7501	2.63403
64.0059	5.90185	62.7835	2.67689
64.0393	5.98596	62.8168	2.72041
64.0726	6.07116	62.8501	2.76461
64.1059	6.1575	62.8835	2.8095
64.1393	6.24496	62.9168	2.85509
64.1726	6.33357	62.9501	2.90139
64.2059	6.42338	62.9835	2.94842
64.2393	6.51433	63.0168	2.99616
64.2726	6.60649	63.0501	3.04465
64.3059	6.69983	63.0835	3.09389
64.3393	6.79439	63.1168	3.14389
64.3726	6.8902	63.1501	3.19466
64.4059	6.98722	63.1835	3.24622
64.4393	7.0855	63.2168	3.29856
64.4726	7.18505	63.2501	3.35171
64.5059	7.2859	63.2835	3.40569
64.5393	7.38802	63.3168	3.46049
64.5726	7.49145	63.3501	3.51612
64.6059	7.59623	63.3835	3.57261
64.6393	7.70231	63.4168	3.62995
64.6726	7.80974	63.4501	3.68818
64.7059	7.9185	63.4835	3.74728
64.7392	8.02867	63.5168	3.8073
64.7726	8.14022	63.5501	3.8682
64.8059	8.25318	63.5835	3.93003
64.8392	8.36755	63.6168	3.99282
64.8726	8.48335	63.6501	4.05653
64.9059	8.6006	63.6835	4.1212
64.9392	8.7193	63.7168	4.18684
64.9726	8.83951	63.7501	4.25347
65.0059	8.96117	63.7835	4.32112
65.0392	9.08432	63.8168	4.38976
65.0726	9.20903	63.8501	4.4594
65.1059	9.33526	63.8835	4.53011
65.1392	9.46303	63.9168	4.60187
65.1726	9.59235	63.9501	4.67469
65.2059	9.72325	63.9834	4.74859
65.2393	9.85572	64.0168	4.82358
65.2726	9.98975	64.0501	4.89971
65.3059	10.1254	64.0834	4.97694
65.3393	10.2627	64.1201	5.06319
65.3726	10.4016	64.1534	5.14282
65.4059	10.5422	64.1868	5.22363
65.4393	10.6844	64.2201	5.30561
65.4726	10.8282	64.2534	5.38878
65.5059	10.9738	64.2868	5.47318
65.5559	11.1954	64.3201	5.55881
65.5893	11.3453	64.3534	5.64566
65.6226	11.4969	64.3868	5.73378
65.6559	11.6502	64.4201	5.82315
65.6893	11.8053	64.4534	5.91381
65.7226	11.9621	64.4868	6.00579
65.7559	12.1208	64.5201	6.09909
65.7893	12.2812	64.5534	6.1937
65.8226	12.4435	64.5868	6.28968
65.8559	12.6076	64.6201	6.38699
65.8893	12.7735	64.6535	6.48571
65.9226	12.9412	64.6868	6.5858
65.9559	13.1108	64.7201	6.6873
65.9892	13.2823	64.7535	6.79022
66.0226	13.4556	64.7868	6.89458
66.0559	13.6309	64.8201	7.00041
66.0893	13.808	64.8534	7.1077
66.1226	13.987	64.8868	7.21652
66.1559	14.168	64.9201	7.32681
66.1892	14.3508	64.9534	7.43862
66.2226	14.5357	64.9868	7.55198
66.2559	14.7224	65.0201	7.66692
66.2892	14.9111	65.0534	7.78339
66.3226	15.1018	65.0868	7.90149
66.3559	15.2945	65.1201	8.02116
66.3892	15.4892	65.1535	8.14248
66.4226	15.6858	65.1868	8.2654
66.4559	15.8844	65.2201	8.38998
66.4892	16.0851	65.2534	8.51622
66.5226	16.2878	65.2868	8.64418
66.5559	16.4924	65.3201	8.7738
66.5892	16.6992	65.3534	8.90514
66.6226	16.9079	65.3868	9.03825
66.6559	17.1187	65.4201	9.17307
66.6892	17.3315	65.4534	9.30965
66.7226	17.5463	65.4868	9.44801
66.7559	17.7633	65.5201	9.58821
66.7892	17.9822	65.5534	9.73021
66.8226	18.2032	65.5868	9.87405
66.8559	18.4263	65.6201	10.0197
66.8893	18.6514	65.6535	10.1672
66.9226	18.8786	65.6868	10.3166
66.9559	19.1078	65.7201	10.4679
66.9893	19.3391	65.7535	10.621
67.0226	19.5724	65.7868	10.7761
67.0559	19.8079	65.8201	10.933
67.0893	20.0453	65.8534	11.092
67.1226	20.2849	65.8868	11.2529
67.1559	20.5264	65.9201	11.4158
67.1893	20.7699	65.9535	11.5806
67.2226	21.0156	65.9868	11.7475
67.2559	21.2632	66.0201	11.9163
67.2892	21.5129	66.0534	12.0872
67.3226	21.7646	66.0868	12.2602
67.3559	22.0184	66.1201	12.4351
67.3893	22.2741	66.1535	12.6121
67.4226	22.5319	66.1868	12.7912
67.4559	22.7917	66.2201	12.9723
67.4893	23.0534	66.2534	13.1556
67.5226	23.317	66.2868	13.3409
67.5559	23.5826	66.3201	13.5284
67.5893	23.8502	66.3534	13.718
67.6259	24.1467	66.3868	13.9097
67.6592	24.4183	66.4201	14.1036
67.6926	24.6919	66.4534	14.2995
67.7259	24.9673	66.4868	14.4977
67.7592	25.2445	66.5201	14.6979
67.7926	25.5236	66.5534	14.9004
67.8259	25.8045	66.5867	15.105
67.8592	26.0874	66.6201	15.3119
67.8926	26.3719	66.6534	15.5209
67.9259	26.6581	66.6868	15.7321
67.9592	26.9462	66.7201	15.9455
67.9926	27.236	66.7534	16.161
68.0259	27.5274	66.7868	16.3788
68.0592	27.8205	66.8201	16.5988
68.0926	28.1153	66.8534	16.821
68.1259	28.4116	66.8868	17.0454
68.1592	28.7096	66.9201	17.2719
68.1926	29.009	66.9534	17.5006
68.2259	29.3101	66.9868	17.7315
68.2592	29.6127	67.0201	17.9647
68.2926	29.9166	67.0534	18.2
68.3259	30.222	67.0868	18.4375
68.3593	30.5288	67.1201	18.6771
68.3926	30.8369	67.1535	18.919
68.4259	31.1463	67.1868	19.163
68.4592	31.4569	67.2201	19.4091
68.4926	31.7689	67.2535	19.6573
68.5259	32.0819	67.2868	19.9077
68.5593	32.3962	67.3201	20.1602
68.5926	32.7114	67.3535	20.4148
68.6259	33.0278	67.3868	20.6714
68.6593	33.3451	67.4201	20.9301
68.6926	33.6635	67.4535	21.1909
68.7259	33.9826	67.4868	21.4537
68.7593	34.3027	67.5202	21.7186
68.7926	34.6235	67.5535	21.9854
68.8259	34.945	67.5868	22.2542
68.8593	35.2674	67.6201	22.525
68.8926	35.5903	67.6535	22.7976
68.9259	35.9138	67.6868	23.0722
68.9592	36.2378	67.7201	23.3487
68.9926	36.5623	67.7535	23.627
69.0259	36.8871	67.7868	23.9072
69.0592	37.2123	67.8201	24.1892
69.0926	37.5379	67.8535	24.4729
69.1259	37.8636	67.8868	24.7583
69.1592	38.1895	67.9201	25.0454
69.1925	38.5155	67.9535	25.3342
69.2259	38.8417	67.9868	25.6246
69.2592	39.1677	68.0201	25.9166
69.2926	39.4936	68.0534	26.2101
69.3259	39.8194	68.0868	26.5051
69.3592	40.145	68.1201	26.8016
69.3926	40.4701	68.1535	27.0996
69.4259	40.7949	68.1868	27.3988
69.4592	41.1193	68.2201	27.6994
69.4926	41.4432	68.2535	28.0013
69.5259	41.7665	68.2868	28.3045
69.5593	42.0889	68.3201	28.6088
69.5926	42.4107	68.3535	28.9142
69.6259	42.7315	68.3868	29.2207
69.6593	43.0515	68.4201	29.5281
69.6926	43.3704	68.4535	29.8366
69.7259	43.6882	68.4868	30.1458
69.7593	44.0048	68.5202	30.456
69.7926	44.3203	68.5535	30.7668
69.8259	44.6344	68.5868	31.0783
69.8593	44.9471	68.6201	31.3905
69.8926	45.2584	68.6535	31.7032
69.926	45.568	68.6868	32.0164
69.9593	45.876	68.7202	32.33
69.9926	46.1823	68.7535	32.6441
70.0259	46.4866	68.7868	32.9582
70.0593	46.7891	68.8202	33.2727
70.0926	47.0897	68.8535	33.5872
70.126	47.3881	68.8868	33.9017
70.1593	47.6842	68.9202	34.2163
70.1926	47.9782	68.9535	34.5307
70.2259	48.2699	68.9868	34.8448
70.2593	48.5592	69.0202	35.1588
70.2926	48.8459	69.0535	35.4722
70.3259	49.13	69.0868	35.7852
70.3593	49.4115	69.1202	36.0977
70.3926	49.6903	69.1535	36.4095
70.4259	49.9662	69.1868	36.7206
70.4593	50.2391	69.2202	37.0309
70.4926	50.5091	69.2535	37.3403
70.5259	50.7759	69.2868	37.6486
70.5593	51.0395	69.3201	37.9559
70.5926	51.3	69.3535	38.2619
70.6259	51.557	69.3868	38.5666
70.6593	51.8107	69.4201	38.8699
70.6926	52.0608	69.4535	39.1718
70.7259	52.3074	69.4868	39.472
70.7592	52.5504	69.5201	39.7705
70.7926	52.7896	69.5535	40.0674
70.8259	53.025	69.5868	40.3622
70.8592	53.2565	69.6201	40.6551
70.8926	53.4841	69.6535	40.9458
70.9259	53.7076	69.6868	41.2345
70.9592	53.9272	69.7201	41.5207
70.9926	54.1425	69.7535	41.8045
71.0259	54.3535	69.7868	42.0859
71.0592	54.5604	69.8201	42.3646
71.0926	54.7628	69.8535	42.6407
71.1259	54.9608	69.8868	42.9138
71.1592	55.1543	69.9201	43.1841
71.1926	55.3433	69.9535	43.4513
71.2259	55.5277	69.9868	43.7154
71.2592	55.7074	70.0201	43.9762
71.2926	55.8825	70.0535	44.2337
71.3259	56.0527	70.0868	44.4877
71.3593	56.2182	70.1201	44.7382
71.3926	56.3788	70.1535	44.9851
71.4259	56.5345	70.1868	45.2283
71.4593	56.6852	70.2201	45.4676
71.4926	56.831	70.2535	45.703
71.5259	56.9717	70.2868	45.9343
71.5593	57.1074	70.3201	46.1615
71.5926	57.2379	70.3535	46.3845
71.6259	57.3634	70.3868	46.6031
71.6593	57.4837	70.4201	46.8174
71.6926	57.5988	70.4535	47.0272
71.7259	57.7088	70.4868	47.2323
71.7593	57.8135	70.5201	47.4328
71.7926	57.9129	70.5535	47.6285
71.8259	58.0071	70.5868	47.8194
71.8593	58.0961	70.6201	48.0054
71.8926	58.1798	70.6535	48.1863
71.9259	58.2582	70.6868	48.3622
71.9593	58.3313	70.7201	48.5329
71.9926	58.3992	70.7535	48.6984
72.0259	58.4618	70.7868	48.8585
72.0593	58.5191	70.8201	49.0133
72.0926	58.5712	70.8534	49.1627
72.1259	58.618	70.8868	49.3065
72.1593	58.6596	70.9201	49.4449
72.1926	58.696	70.9568	49.5905
72.2259	58.7272	70.9901	49.717
72.2593	58.7532	71.0234	49.8377
72.2926	58.7741	71.0568	49.9526
72.3293	58.7912	71.0901	50.0618
72.3626	58.8014	71.1234	50.165
72.3959	58.8067	71.1568	50.2624
72.4293	58.8069	71.1901	50.3538
72.4626	58.8022	71.2234	50.4392
72.4959	58.7926	71.2568	50.5186
72.5293	58.7782	71.2901	50.592
72.5626	58.759	71.3234	50.6593
72.5959	58.7352	71.3568	50.7206
72.6293	58.7066	71.3901	50.7757
72.6626	58.6735	71.4234	50.8248
72.6959	58.6358	71.4568	50.8677
72.7293	58.5938	71.4901	50.9044
72.7626	58.5473	71.5234	50.9351
72.7959	58.4966	71.5568	50.9596
72.8293	58.4417	71.5901	50.978
72.8626	58.3826	71.6234	50.9903
72.8959	58.3196	71.6568	50.9964
72.9293	58.2526	71.6901	50.9965
72.9626	58.1818	71.7234	50.9904
72.9959	58.1072	71.7568	50.9784
73.0293	58.0291	71.7901	50.9602
73.0626	57.9474	71.8235	50.9361
73.0959	57.8623	71.8568	50.906
73.1292	57.7739	71.8901	50.87
73.1626	57.6824	71.9235	50.8281
73.1959	57.5877	71.9568	50.7803
73.2292	57.4902	71.9901	50.7267
73.2626	57.3899	72.0235	50.6674
73.2959	57.2869	72.0568	50.6023
73.3293	57.1814	72.0902	50.5316
73.3626	57.0735	72.1235	50.4554
73.3959	56.9633	72.1568	50.3736
73.4293	56.8511	72.1902	50.2863
73.4626	56.7369	72.2235	50.1937
73.4959	56.6209	72.2568	50.0958
73.5293	56.5032	72.2902	49.9926
73.5626	56.3842	72.3235	49.8843
73.5959	56.2637	72.3568	49.771
73.6293	56.1421	72.3902	49.6526
73.6626	56.0196	72.4235	49.5293
73.696	55.8962	72.4568	49.4013
73.7293	55.7723	72.4901	49.2685
73.7626	55.6479	72.5235	49.1311
73.796	55.5233	72.5568	48.9893
73.8293	55.3986	72.5901	48.843
73.8626	55.274	72.6235	48.6925
73.896	55.1498	72.6568	48.5377
73.9293	55.0261	72.6901	48.3788
73.9626	54.9031	72.7234	48.2161
73.996	54.7811	72.7568	48.0494
74.0293	54.6602	72.7901	47.8791
74.0626	54.5407	72.8234	47.7051
74.096	54.4228	72.8568	47.5277
74.1293	54.3068	72.8901	47.3469
74.1626	54.1927	72.9234	47.1629
74.1959	54.081	72.9568	46.9758
74.2293	53.9718	72.9901	46.7858
74.2626	53.8653	73.0234	46.5929
74.296	53.7618	73.0568	46.3973
74.3293	53.6616	73.0901	46.1992
74.3626	53.5649	73.1235	45.9987
74.3959	53.472	73.1568	45.7959
74.4293	53.3831	73.1902	45.591
74.4626	53.2986	73.2235	45.3843
74.496	53.2186	73.2568	45.1756
74.5293	53.1435	73.2901	44.9654
74.5626	53.0735	73.3235	44.7537
74.596	53.009	73.3568	44.5405
74.6293	52.9502	73.3902	44.3263
74.6626	52.8974	73.4235	44.111
74.696	52.851	73.4568	43.8948
74.7293	52.8112	73.4901	43.6779
74.7626	52.7784	73.5235	43.4604
74.796	52.7529	73.5568	43.2426
74.8293	52.735	73.5901	43.0246
74.8626	52.7251	73.6235	42.8067
74.8959	52.7235	73.6568	42.5888
74.9293	52.7305	73.6901	42.3711
74.9626	52.7465	73.7235	42.154
74.9959	52.7719	73.7568	41.9375
75.0293	52.8071	73.7901	41.7219
75.0626	52.8523	73.8235	41.5073
75.0959	52.9081	73.8568	41.2938
75.1293	52.9747	73.8901	41.0817
75.1626	53.0527	73.9235	40.8712
75.1959	53.1423	73.9568	40.6624
75.2293	53.244	73.9901	40.4556
75.2626	53.3583	74.0235	40.251
75.2959	53.4855	74.0568	40.0486
75.3293	53.6262	74.0901	39.8488
75.3626	53.7806	74.1235	39.6517
75.3959	53.9494	74.1568	39.4574
75.4293	54.133	74.1901	39.2663
75.4626	54.3317	74.2235	39.0786
75.4959	54.5463	74.2568	38.8944
75.5293	54.7771	74.2901	38.7139
75.5626	55.0246	74.3235	38.5373
75.5959	55.2893	74.3568	38.3649
75.6293	55.5718	74.3901	38.1969
75.6626	55.8726	74.4235	38.0335
75.6959	56.1923	74.4568	37.8749
75.7293	56.5313	74.4901	37.7213
75.7626	56.8904	74.5235	37.5731
75.7959	57.27	74.5568	37.4303
75.8293	57.6706	74.5901	37.2934
75.8626	58.093	74.6235	37.1624
75.8959	58.5377	74.6568	37.0376
75.9293	59.0054	74.6902	36.9194
75.9626	59.4967	74.7235	36.8079
75.9959	60.0123	74.7568	36.7033
76.0293	60.5526	74.7902	36.6061
76.0626	61.1185	74.8235	36.5164
76.0959	61.7107	74.8568	36.4344
76.1292	62.3297	74.8902	36.3605
76.1626	62.9766	74.9235	36.295
76.1959	63.6516	74.9568	36.2381
76.2293	64.3559	74.9902	36.1902
76.2626	65.09	75.0235	36.1514
76.2959	65.8544	75.0568	36.1222
76.3293	66.6504	75.0902	36.1028
76.3626	67.4785	75.1235	36.0935
76.3959	68.3394	75.1568	36.0948
76.4293	69.2341	75.1902	36.1068
76.4626	70.1632	75.2235	36.1299
76.496	71.1276	75.2568	36.1645
76.5293	72.1279	75.2901	36.211
76.5626	73.1654	75.3235	36.2696
76.596	74.2408	75.3568	36.3407
76.6293	75.3545	75.3901	36.4248
76.6626	76.508	75.4235	36.5222
76.696	77.7016	75.4568	36.6332
76.7293	78.9368	75.4901	36.7583
76.7626	80.2138	75.5235	36.8979
76.796	81.5343	75.5568	37.0525
76.8293	82.8983	75.5901	37.2224
76.8627	84.3071	75.6235	37.408
76.896	85.7622	75.6568	37.6098
76.9293	87.2635	75.6901	37.8284
76.9626	88.8123	75.7235	38.0641
76.996	90.4097	75.7568	38.3174
77.0293	92.0564	75.7901	38.5888
77.0626	93.7535	75.8235	38.8788
77.096	95.5018	75.8568	39.1879
77.1293	97.3027	75.8902	39.5167
77.1626	99.1561	75.9235	39.8656
77.196	101.064	75.9569	40.2353
77.2293	103.027	75.9902	40.6262
77.2626	105.044	76.0235	41.039
77.296	107.119	76.0569	41.4742
77.3293	109.251	76.0902	41.9324
77.3627	111.441	76.1235	42.4142
77.396	113.69	76.1569	42.9203
77.4293	115.999	76.1902	43.4512
77.4627	118.368	76.2236	44.0077
77.496	120.798	76.2569	44.5902
77.5293	123.29	76.2902	45.1995
77.5627	125.845	76.3236	45.8366
77.596	128.462	76.3569	46.5017
77.6293	131.143	76.3902	47.1957
77.6626	133.889	76.4236	47.9194
77.696	136.699	76.4569	48.6735
77.7293	139.575	76.4902	49.4588
77.7626	142.516	76.5236	50.2763
77.796	145.523	76.5569	51.1262
77.8293	148.596	76.5902	52.0096
77.8627	151.736	76.6235	52.9274
77.896	154.942	76.6569	53.8802
77.9293	158.215	76.6902	54.869
77.9626	161.554	76.7235	55.8946
77.996	164.959	76.7569	56.9582
78.0293	168.432	76.7902	58.0599
78.0627	171.969	76.8235	59.2011
78.096	175.571	76.8569	60.3825
78.1293	179.239	76.8902	61.6047
78.1626	182.971	76.9235	62.8696
78.196	186.766	76.9569	64.1772
78.2293	190.625	76.9902	65.5286
78.2626	194.545	77.0235	66.9252
78.296	198.526	77.0569	68.3671
78.3293	202.567	77.0902	69.8557
78.3626	206.666	77.1235	71.3922
78.396	210.824	77.1569	72.9768
78.4293	215.035	77.1902	74.6103
78.4626	219.301	77.2235	76.2946
78.496	223.617	77.2568	78.0301
78.5293	227.982	77.2902	79.8178
78.5626	232.397	77.3235	81.6585
78.596	236.854	77.3568	83.5532
78.6293	241.356	77.3902	85.5033
78.6626	245.896	77.4235	87.5085
78.696	250.472	77.4568	89.5702
78.7293	255.083	77.4902	91.6899
78.7626	259.725	77.5268	94.0879
78.796	264.393	77.5602	96.3307
78.8293	269.086	77.5935	98.6327
78.8626	273.797	77.6268	100.996
78.896	278.524	77.6602	103.42
78.9293	283.265	77.6935	105.905
78.9626	288.013	77.7268	108.453
78.996	292.764	77.7602	111.064
79.0293	297.514	77.7935	113.738
79.0627	302.259	77.8268	116.477
79.0993	307.465	77.8602	119.28
79.1326	312.18	77.8935	122.146
79.166	316.873	77.9269	125.079
79.1993	321.541	77.9602	128.076
79.2327	326.176	77.9935	131.139
79.266	330.775	78.0269	134.266
79.2993	335.329	78.0602	137.459
79.3327	339.837	78.0935	140.716
79.366	344.288	78.1269	144.038
79.3993	348.679	78.1602	147.424
79.4327	353.005	78.1936	150.874
79.466	357.257	78.2269	154.387
79.4993	361.432	78.2602	157.963
79.5327	365.524	78.2935	161.599
79.566	369.524	78.3269	165.296
79.5993	373.427	78.3602	169.053
79.6327	377.229	78.3936	172.869
79.666	380.924	78.4269	176.74
79.6993	384.505	78.4602	180.668
79.7326	387.967	78.4935	184.649
79.766	391.305	78.5269	188.681
79.7993	394.511	78.5602	192.763
79.8326	397.583	78.5935	196.894
79.8659	400.514	78.6269	201.068
79.8993	403.3	78.6602	205.287
79.9326	405.936	78.6936	209.543
79.9659	408.416	78.7269	213.837
79.9993	410.737	78.7602	218.165
80.0326	412.895	78.7935	222.523
80.0659	414.885	78.8269	226.91
80.0993	416.705	78.8602	231.318
80.1326	418.35	78.8935	235.747
80.1659	419.818	78.9269	240.19
80.1993	421.106	78.9602	244.645
80.2326	422.21	78.9935	249.107
80.266	423.13	79.0269	253.573
80.2993	423.864	79.0602	258.035
80.3326	424.409	79.0935	262.489
80.366	424.766	79.1269	266.932
80.3993	424.932	79.1602	271.356
80.4326	424.908	79.1935	275.759
80.466	424.694	79.2269	280.132
80.4993	424.29	79.2602	284.471
80.5327	423.696	79.2935	288.772
80.566	422.915	79.3268	293.024
80.5994	421.945	79.3602	297.226
80.6327	420.791	79.3935	301.37
80.666	419.453	79.4269	305.45
80.6994	417.934	79.4602	309.46
80.7327	416.237	79.4935	313.395
80.766	414.364	79.5268	317.247
80.7994	412.319	79.5602	321.011
80.8327	410.104	79.5935	324.679
80.8661	407.726	79.6269	328.246
80.8994	405.186	79.6602	331.708
80.9327	402.489	79.6935	335.056
80.9661	399.64	79.7269	338.285
80.9994	396.645	79.7602	341.39
81.0327	393.506	79.7935	344.363
81.0661	390.23	79.8269	347.202
81.0994	386.822	79.8602	349.9
81.1327	383.287	79.8935	352.451
81.1661	379.631	79.9269	354.852
81.1994	375.858	79.9602	357.096
81.2327	371.976	79.9935	359.181
81.2661	367.99	80.0269	361.101
81.2994	363.905	80.0602	362.853
81.3327	359.726	80.0935	364.434
81.3661	355.462	80.1269	365.84
81.3994	351.116	80.1602	367.069
81.4327	346.697	80.1936	368.117
81.466	342.208	80.2269	368.983
81.4994	337.653	80.2602	369.665
81.5327	333.042	80.2935	370.161
81.5661	328.38	80.3269	370.471
81.5994	323.669	80.3602	370.594
81.6327	318.919	80.3936	370.529
81.666	314.134	80.4269	370.277
81.6994	309.319	80.4602	369.838
81.7327	304.48	80.4935	369.213
81.766	299.619	80.5269	368.402
81.7994	294.745	80.5602	367.409
81.8327	289.86	80.5935	366.235
81.866	284.969	80.6269	364.881
81.8994	280.079	80.6602	363.352
81.9327	275.192	80.6935	361.649
81.966	270.314	80.7269	359.776
81.9994	265.449	80.7602	357.737
82.0327	260.598	80.7935	355.536
82.066	255.767	80.8269	353.176
82.0994	250.957	80.8602	350.664
82.1327	246.174	80.8936	348.002
82.166	241.423	80.9269	345.197
82.1994	236.703	80.9602	342.252
82.2327	232.02	80.9935	339.175
82.266	227.375	81.0269	335.969
82.2994	222.771	81.0602	332.642
82.3327	218.211	81.0936	329.197
82.366	213.697	81.1269	325.644
82.3994	209.23	81.1602	321.985
82.4327	204.815	81.1936	318.227
82.466	200.451	81.2269	314.376
82.4994	196.141	81.2602	310.439
82.5327	191.885	81.2936	306.423
82.5661	187.686	81.3269	302.333
82.5994	183.544	81.3602	298.175
82.6327	179.461	81.3936	293.953
82.6661	175.439	81.4269	289.677
82.6994	171.478	81.4602	285.351
82.7327	167.579	81.4936	280.979
82.7661	163.742	81.5269	276.57
82.7994	159.969	81.5602	272.127
82.8328	156.259	81.5936	267.658
82.8661	152.613	81.6269	263.166
82.8994	149.032	81.6602	258.658
82.9327	145.514	81.6936	254.138
82.9661	142.062	81.7269	249.612
82.9994	138.674	81.7602	245.082
83.0327	135.351	81.7935	240.558
83.0661	132.093	81.8269	236.037
83.0994	128.9	81.8602	231.528
83.1328	125.771	81.8936	227.034
83.1661	122.707	81.9269	222.56
83.1994	119.707	81.9603	218.108
83.2327	116.769	81.9936	213.683
83.2661	113.896	82.0269	209.287
83.2994	111.087	82.0603	204.924
83.3328	108.338	82.0936	200.598
83.3661	105.654	82.1269	196.311
83.3994	103.03	82.1603	192.064
83.4327	100.468	82.1936	187.86
83.4661	97.9667	82.227	183.702
83.4994	95.526	82.2603	179.594
83.5327	93.145	82.2936	175.535
83.5661	90.8234	82.3269	171.528
83.5994	88.5606	82.3603	167.573
83.6327	86.356	82.3936	163.674
83.6661	84.2092	82.4269	159.831
83.6994	82.1196	82.4603	156.045
83.7327	80.0867	82.4936	152.318
83.7661	78.1095	82.5269	148.648
83.7994	76.1886	82.5603	145.04
83.8327	74.323	82.5936	141.492
83.8661	72.5123	82.6269	138.005
83.8994	70.7555	82.6603	134.581
83.9327	69.0532	82.6936	131.217
83.966	67.4045	82.7269	127.915
83.9994	65.8086	82.7602	124.676
84.0327	64.2662	82.7936	121.499
84.0661	62.7759	82.8269	118.384
84.0994	61.3384	82.8602	115.331
84.1327	59.953	82.8936	112.341
84.166	58.6195	82.9269	109.412
84.1994	57.3376	82.9602	106.545
84.2327	56.1072	82.9936	103.738
84.2661	54.9278	83.0269	100.991
84.2994	53.7996	83.0602	98.3049
84.3327	52.7229	83.0936	95.6778
84.3661	51.6969	83.1269	93.1103
84.3994	50.7222	83.1603	90.6011
84.4327	49.798	83.1936	88.1495
84.4661	48.925	83.2269	85.7541
84.4994	48.1025	83.2603	83.4149
84.5327	47.3309	83.2936	81.1318
84.5661	46.6098	83.3269	78.9028
84.5994	45.9394	83.3603	76.7283
84.6327	45.3191	83.3936	74.6068
84.6661	44.7491	83.4269	72.5376
84.6994	44.229	83.4603	70.5192
84.7327	43.7586	83.4936	68.5519
84.7661	43.3374	83.5269	66.6338
84.7994	42.9649	83.5603	64.7651
84.8328	42.6403	83.5936	62.9433
84.8661	42.363	83.6269	61.1692
84.8994	42.1321	83.6603	59.4413
84.9327	41.9463	83.6936	57.7594
84.9661	41.8045	83.727	56.1221
84.9994	41.7051	83.7603	54.5285
85.0328	41.6464	83.7936	52.9778
85.0661	41.6264	83.8269	51.4688
85.0994	41.6428	83.8603	50.0011
85.1328	41.6932	83.8936	48.5743
85.1661	41.7748	83.927	47.1873
85.1994	41.8844	83.9603	45.8389
85.2327	42.0186	83.9936	44.5293
85.2661	42.174	84.027	43.2569
85.2994	42.3463	84.0603	42.0214
85.3328	42.5317	84.0936	40.8227
85.3661	42.7253	84.127	39.6594
85.3994	42.9228	84.1603	38.5316
85.4327	43.1191	84.1936	37.4387
85.4661	43.3093	84.227	36.3794
85.5028	43.5053	84.2603	35.3542
85.5361	43.6659	84.2936	34.3621
85.5694	43.8045	84.327	33.4033
85.6028	43.9161	84.3603	32.4773
85.6361	43.9957	84.3936	31.5838
85.6694	44.0387	84.427	30.7228
85.7028	44.0407	84.4603	29.8938
85.7361	43.9977	84.4936	29.0974
85.7695	43.9061	84.5269	28.3334
85.8028	43.7629	84.5636	27.5306
85.8361	43.5654	84.597	26.8349
85.8695	43.3116	84.6303	26.1724
85.9028	43.0001	84.6636	25.5433
85.9361	42.6302	84.697	24.9479
85.9695	42.2017	84.7303	24.387
86.0028	41.7152	84.7636	23.8609
86.0361	41.1715	84.797	23.3702
86.0695	40.5727	84.8303	22.9157
86.1028	39.9207	84.8636	22.498
86.1361	39.2183	84.897	22.1175
86.1695	38.469	84.9303	21.7748
86.2028	37.6759	84.9636	21.4703
86.2361	36.8434	84.997	21.2044
86.2695	35.9751	85.0303	20.9768
86.3028	35.0761	85.0636	20.7874
86.3361	34.1504	85.097	20.6354
86.3695	33.2023	85.1303	20.5199
86.4028	32.237	85.1636	20.4389
86.4361	31.2585	85.197	20.3904
86.4695	30.2712	85.2303	20.3712
86.5028	29.2793	85.2636	20.3777
86.5361	28.2866	85.297	20.4052
86.5695	27.2971	85.3303	20.4485
86.6028	26.3138	85.3637	20.5012
86.6361	25.3405	85.397	20.5566
86.6694	24.3798	85.4303	20.6072
86.7028	23.4341	85.4637	20.6451
86.7361	22.5063	85.497	20.6623
86.7695	21.5981	85.5303	20.6509
86.8028	20.7112	85.5637	20.6032
86.8361	19.8471	85.597	20.5125
86.8695	19.0068	85.6304	20.3729
86.9028	18.1917	85.6637	20.1799
86.9361	17.4023	85.697	19.9304
86.9694	16.639	85.7304	19.6231
87.0028	15.9022	85.7637	19.2581
87.0361	15.1924	85.797	18.8378
87.0695	14.509	85.8303	18.3655
87.1028	13.8525	85.8637	17.8461
87.1361	13.222	85.897	17.2856
87.1695	12.6175	85.9304	16.691
87.2028	12.0385	85.9637	16.0695
87.2361	11.4846	85.997	15.4284
87.2695	10.9548	86.0303	14.7755
87.3028	10.4488	86.0637	14.1177
87.3362	9.96578	86.097	13.4613
87.3695	9.5049	86.1303	12.8123
87.4028	9.0655	86.1637	12.1755
87.4362	8.64682	86.197	11.5556
87.4695	8.24818	86.2303	10.9558
87.5028	7.86858	86.2637	10.3787
87.5362	7.50745	86.297	9.82643
87.5695	7.16392	86.3303	9.30012
87.6028	6.83712	86.3637	8.80053
87.6362	6.5265	86.397	8.3279
87.6695	6.23116	86.4303	7.88203
87.7028	5.95047	86.4637	7.46242
87.7362	5.68383	86.497	7.0682
87.7695	5.43047	86.5303	6.69862
87.8029	5.18968	86.5636	6.35248
87.8362	4.96093	86.597	6.02849
87.8695	4.74373	86.6303	5.7256
87.9029	4.53725	86.6637	5.44245
87.9362	4.34108	86.697	5.17777
87.9695	4.15468	86.7303	4.93035
88.0029	3.97756	86.7636	4.69891
88.0362	3.80923	86.797	4.48239
88.0695	3.64929	86.8303	4.27976
88.1029	3.49719	86.8637	4.08987
88.1362	3.35262	86.897	3.91182
88.1696	3.2151	86.9303	3.74471
88.2029	3.08433	86.9637	3.58775
88.2362	2.95988	86.997	3.44008
88.2862	2.78443	87.0303	3.30102
88.3196	2.67444	87.0637	3.16996
88.3529	2.56974	87.097	3.04625
88.3862	2.47002	87.1303	2.92934
88.4196	2.37497	87.1637	2.81868
88.4529	2.28441	87.197	2.71387
88.4862	2.19806	87.2303	2.61445
88.5196	2.11573	87.2637	2.52002
88.5529	2.03719	87.297	2.43025
88.5862	1.96225	87.3303	2.34481
88.6196	1.89068	87.3637	2.2634
88.6529	1.82235	87.397	2.18571
88.6862	1.75709	87.4303	2.11155
88.7196	1.69473	87.4637	2.04066
88.7529	1.63512	87.497	1.97283
88.7862	1.57811	87.5303	1.90787
88.8196	1.52357	87.5637	1.84563
88.8529	1.47139	87.597	1.78591
88.8862	1.42144	87.6304	1.7286
88.9196	1.37359	87.6637	1.67353
88.9529	1.32776	87.697	1.62062
88.9862	1.28384	87.7303	1.56973
89.0196	1.24174	87.7637	1.52072
89.0529	1.20135	87.797	1.47352
89.0862	1.1626	87.8303	1.42805
89.1196	1.12543	87.8637	1.38422
89.1529	1.08973	87.897	1.34194
89.1863	1.05544	87.9304	1.30114
89.2196	1.02251	87.9637	1.26176
89.2529	0.990865	87.997	1.22374
89.2862	0.960438	88.0303	1.18699
89.3196	0.931175	88.0637	1.15149
89.3529	0.903022	88.097	1.11717
89.3862	0.875928	88.1304	1.08397
89.4196	0.849836	88.1637	1.05187
89.4529	0.824717	88.197	1.02081
89.4862	0.800518	88.2304	0.990763
89.5196	0.777198	88.2637	0.961668
89.5529	0.754719	88.3137	0.919763
89.5862	0.733037	88.347	0.89293
89.6196	0.71213	88.3804	0.866934
89.6529	0.691957	88.4137	0.841758
89.6862	0.672482	88.447	0.81736
89.7196	0.653687	88.4804	0.793717
89.7529	0.635536	88.5137	0.770805
89.7862	0.618002	88.547	0.748598
89.8196	0.601056	88.5804	0.727071
89.8529	0.584682	88.6137	0.706208
89.8862	0.568853	88.6471	0.685974
89.9196	0.553541	88.6804	0.666354
89.9529	0.538731	88.7137	0.647333
89.9862	0.524406	88.7471	0.628887
		88.7804	0.61099
		88.8137	0.593631
		88.8471	0.576792
		88.8804	0.560461
		88.9137	0.544613
		88.9471	0.529241
		88.9804	0.514321
		89.0138	0.499844
		89.0471	0.485796
		89.0804	0.472163
		89.1138	0.458933
		89.1471	0.446096
		89.1804	0.433633
		89.2138	0.421541
		89.2471	0.409802
		89.2804	0.398408
		89.3138	0.387344
		89.3471	0.376607
		89.3804	0.366179
		89.4138	0.356059
		89.4471	0.346231
		89.4805	0.336691
		89.5138	0.327428
		89.5471	0.318434
		89.5804	0.3097
		89.6138	0.30122
		89.6471	0.292982
		89.6804	0.284984
		89.7138	0.277215
		89.7471	0.269672
		89.7804	0.262346
		89.8138	0.25523
		89.8471	0.248319
		89.8804	0.241607
		89.9138	0.235084
		89.9471	0.228752
		89.9804	0.2226
		90.0138	0.216621
