# Supplementary material for: Development and biophysical characterization of a humanized FSH–blocking monoclonal antibody therapeutic formulated at an ultra-high concentration
Source: eLife. 2023 Jun 19;12:e88898. doi: 10.7554/eLife.88898 (PMC10325703; doi:10.7554/eLife.88898)
Supplement: Figure 5—source data 1. [file elife-88898-fig5-data1.xlsx]

## Sheet: Figure 5A
Figure 5A:Effect of freeze-thaw on thermostability of formulated MS-Hu6 by protein thermal shift
-80 °C/25°C, 3 Cycles															-80 °C/37°C, 3 Cycles
Cycle 0				Cycle I		Cycle II				Cycle III					Cycle 0				Cycle I				Cycle II				Cycle III
Replicate 1		Replicate 2		Replicate 1		Replicate 1		Replicate 2		Replicate 1		Replicate 2			Replicate 1		Replicate 2		Replicate 1		Replicate 2		Replicate 1		Replicate 2		Replicate 1		Replicate 2
Temp (°C)	dF/dT	Temp (°C)	dF/dT	Temp (°C)	dF/dT	Temp (°C)	dF/dT	Temp (°C)	dF/dT	Temp (°C)	dF/dT	Temp (°C)	dF/dT		Temp (°C)	dF/dT	Temp (°C)	dF/dT	Temp (°C)	dF/dT	Temp (°C)	dF/dT	Temp (°C)	dF/dT	Temp (°C)	dF/dT	Temp (°C)	dF/dT	Temp (°C)	dF/dT
28.3808	-13038.2	28.3808	-18775.3	28.3805	-23727.3	28.3826	-11657.4	28.3826	-15798.7	28.3798	-18361.6	28.3798	-10478.4		28.3808	-13038.2	28.3808	-18775.3	28.3783	-13297.4	28.3783	-8333.73	28.3808	-3932.92	28.3808	-22128.8	28.3845	-24538.8	28.3845	-7647.09
28.6804	-13689.3	28.6804	-19019.2	28.6801	-23642.2	28.6826	-11815.7	28.6826	-15840.4	28.6795	-18411.2	28.6795	-10840		28.6804	-13689.3	28.6804	-19019.2	28.6783	-13348.8	28.6783	-8545.01	28.6804	-5053.48	28.6804	-21965.6	28.6843	-24446	28.6843	-9145.68
28.9802	-13972.5	28.9802	-19301.2	28.98	-23836.3	28.9827	-11911.5	28.9827	-16174.5	28.9796	-18566.7	28.9796	-11209.6		28.9802	-13972.5	28.9802	-19301.2	28.9785	-13309	28.9785	-8764.35	28.9802	-6090.63	28.9802	-21995.2	28.9844	-24263.3	28.9844	-10809.1
29.2804	-14095.5	29.2804	-19225.5	29.2802	-23759.8	29.2833	-12024.9	29.2833	-16267.6	29.2801	-18654.5	29.2801	-11553		29.2804	-14095.5	29.2804	-19225.5	29.2791	-13315.6	29.2791	-8892	29.2804	-7062.01	29.2804	-22131.6	29.2846	-23988	29.2846	-12283.7
29.5807	-14610.5	29.5807	-19335.9	29.5805	-23829.2	29.5839	-12271.5	29.5839	-16389.3	29.5811	-18743.9	29.5811	-11895.2		29.5807	-14610.5	29.5807	-19335.9	29.5798	-13299.6	29.5798	-9088.53	29.5807	-7990.53	29.5807	-22136	29.585	-23815.2	29.585	-13705.3
29.8809	-14889.9	29.8809	-19331.4	29.8807	-23834.9	29.8843	-12453.6	29.8843	-16912.1	29.8821	-18755.3	29.8821	-12192.2		29.8809	-14889.9	29.8809	-19331.4	29.8804	-13432.1	29.8804	-9297.01	29.8809	-8894.22	29.8809	-22257.3	29.8853	-23651.9	29.8853	-14925
30.1809	-15101.8	30.1809	-19439	30.1808	-23908.7	30.1843	-12625.6	30.1843	-16968.8	30.1828	-18704.3	30.1828	-12493.2		30.1809	-15101.8	30.1809	-19439	30.181	-13465.5	30.181	-9491.43	30.1809	-9711.82	30.1809	-22212.6	30.1853	-23487.1	30.1853	-16157.8
30.4808	-15367.4	30.4808	-19285.4	30.4808	-23917.1	30.4841	-12872.3	30.4841	-17037.4	30.4831	-18658	30.4831	-12776.3		30.4808	-15367.4	30.4808	-19439	30.4814	-13443.6	30.4814	-9561.58	30.4808	-10443.3	30.4808	-22167.8	30.4851	-23297.2	30.4851	-17029.2
30.7809	-15614.4	30.7809	-19264.1	30.7807	-23451.2	30.784	-13004.8	30.784	-17105.4	30.7834	-18519	30.7834	-12934.9		30.7809	-15614.4	30.7809	-19439	30.7819	-13428.6	30.7819	-9729.9	30.7809	-11094.8	30.7809	-22022.3	30.7851	-23157.1	30.7851	-17757
31.0809	-15991.7	31.0809	-19241.8	31.0804	-23447.8	31.0835	-13223.7	31.0835	-16930.6	31.0835	-18374.9	31.0835	-13093.8		31.0809	-15991.7	31.0809	-19439	31.082	-13502.9	31.082	-9677.13	31.0809	-11604.5	31.0809	-21950.2	31.085	-22957.3	31.085	-18352.8
31.3804	-16289.6	31.3804	-19198.4	31.3797	-23441.8	31.3824	-13364.6	31.3824	-16876.1	31.383	-18278	31.383	-13105.8		31.3804	-16289.6	31.3804	-19439	31.3814	-13355.7	31.3814	-9652.32	31.3804	-11979.1	31.3804	-21810.4	31.3843	-22871.5	31.3843	-18806
31.6798	-15865.6	31.6798	-19096	31.6788	-23399.4	31.6813	-13441	31.6813	-16968.3	31.6822	-18249.9	31.6822	-13124.9		31.6798	-15865.6	31.6798	-19439	31.6806	-13213.3	31.6806	-9617.7	31.6798	-12152.7	31.6798	-21805.1	31.6835	-22602.1	31.6835	-19219.3
31.9791	-15985.7	31.9791	-18999.2	31.9777	-23048.4	31.98	-13650.5	31.98	-16697.6	31.9811	-18049.8	31.9811	-13156.9		31.9791	-15985.7	31.9791	-19439	31.9797	-13060.4	31.9797	-9580.2	31.9791	-12342.8	31.9791	-21546.1	31.9826	-22450.4	31.9826	-19357.4
32.2779	-16132.9	32.2779	-18924.2	32.2761	-22752.7	32.2782	-13875.8	32.2782	-16718.7	32.2795	-17889.5	32.2795	-13121.8		32.2779	-16132.9	32.2779	-19439	32.2784	-12958.8	32.2784	-9554.03	32.2779	-12473.8	32.2779	-21484.5	32.2811	-22317.4	32.2811	-19536.6
32.5761	-16041.8	32.5761	-18642.4	32.5739	-22452.7	32.5759	-13964.3	32.5759	-16570.1	32.5772	-17701.4	32.5772	-13108.7		32.5761	-16041.8	32.5761	-19439	32.5763	-12873.4	32.5763	-9542.58	32.5761	-12566.3	32.5761	-21368.2	32.5791	-22130.7	32.5791	-19658.1
32.8742	-16081.3	32.8742	-18389.4	32.8718	-22174.6	32.8737	-13975.7	32.8737	-16203.4	32.8746	-17528.1	32.8746	-12983.2		32.8742	-16081.3	32.8742	-19439	32.8743	-12602.1	32.8743	-9487.52	32.8742	-12543	32.8742	-21204.7	32.877	-21914.2	32.877	-19738.4
33.1728	-16345.5	33.1728	-18162.5	33.1701	-21863.1	33.172	-14061.3	33.172	-16077.4	33.1723	-17340.7	33.1723	-12766.2		33.1728	-16345.5	33.1728	-19439	33.1727	-12336	33.1727	-9409.49	33.1728	-12501	33.1728	-21106.4	33.1752	-21762.5	33.1752	-19718.1
33.4716	-16343.4	33.4716	-18074.9	33.4686	-21480.2	33.4704	-14042.6	33.4704	-15752.8	33.4705	-17089.7	33.4705	-12626.3		33.4716	-16343.4	33.4716	-19439	33.4713	-12188.5	33.4713	-9453.92	33.4716	-12494.3	33.4716	-20946.5	33.4736	-21650.6	33.4736	-19832.8
33.7704	-16212.6	33.7704	-17922.5	33.7674	-21417	33.7689	-13931.2	33.7689	-15976.8	33.7688	-16895.5	33.7688	-12498.2		33.7704	-16212.6	33.7704	-19439	33.77	-11996	33.77	-9407.95	33.7704	-12515.6	33.7704	-20903.9	33.7717	-21522.4	33.7717	-19886.7
34.0693	-15866.7	34.0693	-17665.6	34.0665	-21373.8	34.0679	-13857.9	34.0679	-16089.2	34.0675	-16744.1	34.0675	-12410.1		34.0693	-15866.7	34.0693	-19439	34.069	-11729.9	34.069	-9369.1	34.0693	-12512.8	34.0693	-20896.5	34.0698	-21350.9	34.0698	-19805.9
34.3689	-15634.1	34.3689	-17555.4	34.3662	-20775.3	34.3676	-13828.3	34.3676	-16286.6	34.367	-16494.3	34.367	-12308.5		34.3689	-15634.1	34.3689	-19439	34.3688	-11579.3	34.3688	-9354.38	34.3689	-12518.5	34.3689	-20717.4	34.3685	-21045.3	34.3685	-19736.3
34.6691	-16020.4	34.6691	-17414.5	34.6665	-20547.3	34.6679	-13818.8	34.6679	-16106.9	34.6672	-16262.4	34.6672	-12166.6		34.6691	-16020.4	34.6691	-19439	34.6692	-11506.9	34.6692	-9281.65	34.6691	-12460.6	34.6691	-20607.7	34.6679	-20906.6	34.6679	-19602.7
34.9686	-15804.5	34.9686	-17281.3	34.9664	-20484.5	34.9676	-13765.3	34.9676	-16338.9	34.9668	-16228.5	34.9668	-12047.3		34.9686	-15804.5	34.9686	-19439	34.9689	-11462.5	34.9689	-9219.35	34.9686	-12547.9	34.9686	-20855.9	34.9669	-20853.5	34.9669	-19613.7
35.2681	-15785.6	35.2681	-17125.5	35.2662	-20480.3	35.2672	-13617.6	35.2672	-16167.2	35.2663	-15999.9	35.2663	-11958.3		35.2681	-15785.6	35.2681	-19439	35.2685	-11348.4	35.2685	-9165.09	35.2681	-12461.9	35.2681	-20658.2	35.2658	-20641.7	35.2658	-19495.2
35.5685	-15655.1	35.5685	-17135.4	35.5667	-20328.1	35.5675	-13483.3	35.5675	-16088.1	35.5668	-15849.4	35.5668	-11799.6		35.5685	-15655.1	35.5685	-19439	35.569	-11249.7	35.569	-9073.9	35.5685	-12517.1	35.5685	-20510.7	35.5658	-20531.4	35.5658	-19475.4
35.8692	-15459.8	35.8692	-17089.8	35.8674	-20151.6	35.8681	-13469.2	35.8681	-15949.3	35.8675	-15678.3	35.8675	-11714.5		35.8692	-15459.8	35.8692	-19439	35.8696	-11309	35.8696	-9004.08	35.8692	-12542.9	35.8692	-20408.5	35.8661	-20469.3	35.8661	-19373.7
36.1698	-14988.9	36.1698	-16897.3	36.1681	-19959.4	36.1685	-13351.1	36.1685	-15655	36.1683	-15497.9	36.1683	-11662.9		36.1698	-14988.9	36.1698	-19439	36.1702	-11333.4	36.1702	-8937.12	36.1698	-12481.1	36.1698	-20318.9	36.1664	-20263.1	36.1664	-19238
36.4706	-14606.3	36.4706	-16744.9	36.4689	-19847.1	36.4691	-13289.9	36.4691	-15825.9	36.4692	-15346.5	36.4692	-11586.5		36.4706	-14606.3	36.4706	-19439	36.4709	-11135.6	36.4709	-8837.89	36.4706	-12365.9	36.4706	-20245.5	36.467	-20056	36.467	-19027.6
36.7715	-14385.8	36.7715	-16616.5	36.7698	-19635.6	36.7699	-13297.6	36.7699	-15383.5	36.7701	-15197.5	36.7701	-11482.2		36.7715	-14385.8	36.7715	-19439	36.7717	-11006.5	36.7717	-8748.5	36.7715	-12232	36.7715	-20088.8	36.768	-19798.1	36.768	-18827
37.0729	-14396.8	37.0729	-16577.6	37.071	-19433.5	37.0708	-13219.4	37.0708	-15052	37.0713	-14972.4	37.0713	-11316		37.0729	-14396.8	37.0729	-19439	37.0729	-10903.2	37.0729	-8659.76	37.0729	-12077	37.0729	-19863	37.0695	-19593.8	37.0695	-18660.1
37.3741	-14425.8	37.3741	-16445.9	37.372	-19392.8	37.3716	-13166.6	37.3716	-14599.9	37.3722	-14813.8	37.3722	-11238.7		37.3741	-14425.8	37.3741	-19439	37.3738	-10942.1	37.3738	-8577.36	37.3741	-11922.9	37.3741	-19721.8	37.3709	-19523.1	37.3709	-18567.7
37.6749	-13982.2	37.6749	-16241.4	37.6726	-19351.1	37.6719	-13063.5	37.6719	-14283.8	37.6727	-14680.1	37.6727	-11160.2		37.6749	-13982.2	37.6749	-19439	37.6743	-10813.1	37.6743	-8528.15	37.6749	-11857.6	37.6749	-19715.4	37.6719	-19343.9	37.6719	-18506.6
37.9771	-13736.7	37.9771	-15969.1	37.9745	-19115.7	37.9736	-12849.3	37.9736	-13823.4	37.9745	-14360.5	37.9745	-10977.2		37.9771	-13736.7	37.9771	-19439	37.9762	-10685.4	37.9762	-8419.87	37.9771	-11602.5	37.9771	-19245.2	37.9741	-18930.5	37.9741	-18219
38.2805	-13503.9	38.2805	-15935.7	38.2776	-18916.3	38.2765	-12717.7	38.2765	-13666.9	38.2776	-14294.8	38.2776	-10833.1		38.2805	-13503.9	38.2805	-19439	38.2793	-10543.1	38.2793	-8301.08	38.2805	-11550	38.2805	-19133.9	38.2776	-18785.6	38.2776	-18124.9
38.5836	-13341.8	38.5836	-15750.5	38.5803	-18805.3	38.5791	-12615	38.5791	-13537.8	38.5803	-14121.5	38.5803	-10751.4		38.5836	-13341.8	38.5836	-19439	38.582	-10395.4	38.582	-8220.71	38.5836	-11417	38.5836	-19043.9	38.5806	-18680.8	38.5806	-17931.1
38.8864	-13337.9	38.8864	-15619.6	38.883	-18764.2	38.8815	-12434.5	38.8815	-13462.5	38.8829	-13997.8	38.8829	-10638.6		38.8864	-13337.9	38.8864	-19439	38.8846	-10218.2	38.8846	-8149.41	38.8864	-11300.4	38.8864	-18877.6	38.8833	-18511.4	38.8833	-17913.2
39.1892	-13497.9	39.1892	-15603.6	39.1854	-18724.4	39.1838	-12321.9	39.1838	-13632	39.1853	-13904.1	39.1853	-10591.1		39.1892	-13497.9	39.1892	-19439	39.1871	-10111.5	39.1871	-8122.58	39.1892	-11288	39.1892	-18706.1	39.1859	-18362	39.1859	-17933.3
39.4915	-13464.4	39.4915	-15434.3	39.4876	-18777.4	39.4859	-12180.5	39.4859	-13205.5	39.4874	-13873.6	39.4874	-10504.9		39.4915	-13464.4	39.4915	-19439	39.4892	-10077.5	39.4892	-8040.59	39.4915	-11225.2	39.4915	-18619.3	39.4882	-18242.1	39.4882	-17856.2
39.7934	-13332.4	39.7934	-15282.9	39.7894	-18688.5	39.7877	-12103.3	39.7877	-13099.6	39.7892	-13794.2	39.7892	-10450.6		39.7934	-13332.4	39.7934	-19439	39.7908	-10046.4	39.7908	-8000.67	39.7934	-11231	39.7934	-18545.5	39.7901	-18278	39.7901	-17857.4
40.0948	-13091.2	40.0948	-15090.2	40.0906	-18571.8	40.089	-12014	40.089	-13127.3	40.0904	-13796	40.0904	-10430.8		40.0948	-13091.2	40.0948	-19439	40.0919	-10021.9	40.0919	-7983.91	40.0948	-11207	40.0948	-18499	40.0914	-18167.8	40.0914	-17885.5
40.3958	-12817.7	40.3958	-14943.9	40.3915	-18616.9	40.3899	-11859	40.3899	-13355.3	40.3913	-13703.9	40.3913	-10352.8		40.3958	-12817.7	40.3958	-19439	40.3926	-9853.27	40.3926	-7904.98	40.3958	-11149.5	40.3958	-18467.3	40.3923	-18020.9	40.3923	-17814.3
40.6968	-12880.7	40.6968	-14885.9	40.6925	-18400.6	40.691	-11747.3	40.691	-13574.2	40.6924	-13603.3	40.6924	-10274.3		40.6968	-12880.7	40.6968	-19439	40.6935	-9813.17	40.6935	-7857.35	40.6968	-11112.2	40.6968	-18234.5	40.6933	-17958.3	40.6933	-17689.8
40.9972	-12984.6	40.9972	-14850.6	40.9927	-18278.8	40.9914	-11689.4	40.9914	-13387	40.9928	-13548.1	40.9928	-10254.9		40.9972	-12984.6	40.9972	-19439	40.9937	-9793.81	40.9937	-7822.22	40.9972	-11108.9	40.9972	-18268.7	40.9936	-17941.9	40.9936	-17730.3
41.2967	-12860.9	41.2967	-14653.7	41.2923	-18174.4	41.2911	-11597.2	41.2911	-13208.3	41.2925	-13439.6	41.2925	-10201		41.2967	-12860.9	41.2967	-19439	41.2932	-9829.49	41.2932	-7840.1	41.2967	-11020.2	41.2967	-18150.5	41.2932	-17857.2	41.2932	-17690.6
41.5965	-12756.9	41.5965	-14522.6	41.5921	-18081.8	41.591	-11481.2	41.591	-13067.2	41.5924	-13398.9	41.5924	-10115.8		41.5965	-12756.9	41.5965	-19439	41.5929	-9790.86	41.5929	-7826.98	41.5965	-10888.1	41.5965	-18066.6	41.5931	-17618	41.5931	-17622.8
41.8962	-12477.7	41.8962	-14379.8	41.8919	-17864.6	41.891	-11385.6	41.891	-12917.6	41.8924	-13325.1	41.8924	-10086.2		41.8962	-12477.7	41.8962	-19439	41.8927	-9715.95	41.8927	-7797.43	41.8962	-10800.5	41.8962	-18017.5	41.893	-17391.2	41.893	-17446.1
42.1958	-12116.3	42.1958	-14205.7	42.1916	-17726.5	42.191	-11326.5	42.191	-12667	42.1923	-13233.8	42.1923	-9956.19		42.1958	-12116.3	42.1958	-19439	42.1924	-9601	42.1924	-7744.64	42.1958	-10607.9	42.1958	-17980.7	42.1928	-17296.2	42.1928	-17263.2
42.4957	-11998.3	42.4957	-14122.8	42.4915	-17406.9	42.4911	-11236.8	42.4911	-12852.5	42.4923	-13060.1	42.4923	-9876.9		42.4957	-11998.3	42.4957	-19439	42.4923	-9495.93	42.4923	-7710.18	42.4957	-10528.4	42.4957	-17830.2	42.4929	-17100.5	42.4929	-17181.9
42.7956	-12046.5	42.7956	-14043.2	42.7914	-17349.1	42.7912	-11101.7	42.7912	-12978.5	42.7924	-12950.6	42.7924	-9816.23		42.7956	-12046.5	42.7956	-19439	42.7923	-9450.98	42.7923	-7682.97	42.7956	-10362	42.7956	-17699	42.7929	-16804.5	42.7929	-17038.4
43.0957	-12046.4	43.0957	-14019.8	43.0914	-17112.9	43.0914	-10999.9	43.0914	-12625.3	43.0927	-12739.2	43.0927	-9703.43		43.0957	-12046.4	43.0957	-19439	43.0925	-9307.76	43.0925	-7608.59	43.0957	-10191	43.0957	-17494.1	43.0931	-16586.5	43.0931	-16840.5
43.3961	-12177.6	43.3961	-13919	43.3918	-16786	43.392	-10918.3	43.392	-12197	43.3934	-12630.2	43.3934	-9597.43		43.3961	-12177.6	43.3961	-19439	43.393	-9216.27	43.393	-7558.89	43.3961	-10070.6	43.3961	-17327.7	43.3937	-16444.6	43.3937	-16701.4
43.6965	-11818.5	43.6965	-13806.9	43.6922	-16705.7	43.6924	-10873.9	43.6924	-11885.6	43.694	-12514.2	43.694	-9504.53		43.6965	-11818.5	43.6965	-19439	43.6935	-9129.72	43.6935	-7476.65	43.6965	-9910.48	43.6965	-17233.6	43.6942	-16238	43.6942	-16621.9
43.9967	-11483.1	43.9967	-13682.4	43.9924	-16569.7	43.9927	-10816.7	43.9927	-12091.3	43.9944	-12436.6	43.9944	-9422.76		43.9967	-11483.1	43.9967	-19439	43.9939	-8949.87	43.9939	-7439.4	43.9967	-9785.39	43.9967	-17074.6	43.9946	-16052	43.9946	-16473.7
44.2966	-11381.8	44.2966	-13537.8	44.2923	-16473.3	44.2927	-10784.6	44.2927	-12075.6	44.2945	-12284.5	44.2945	-9330.94		44.2966	-11381.8	44.2966	-19439	44.2939	-8699.7	44.2939	-7346.79	44.2966	-9669.23	44.2966	-16947.1	44.2947	-15814.1	44.2947	-16314.1
44.5962	-11262.9	44.5962	-13407	44.592	-16298.1	44.5924	-10769.5	44.5924	-11928	44.5943	-12102.1	44.5943	-9252.54		44.5962	-11262.9	44.5962	-19439	44.5937	-8529.63	44.5937	-7252.11	44.5962	-9543.88	44.5962	-16738.3	44.5945	-15639.6	44.5945	-16186.9
44.8958	-11203.7	44.8958	-13264.5	44.8916	-16193.3	44.8919	-10728.9	44.8919	-11748.1	44.894	-11938.1	44.894	-9148.96		44.8958	-11203.7	44.8958	-19439	44.8934	-8417.26	44.8934	-7192.9	44.8958	-9401.01	44.8958	-16493.5	44.8941	-15526	44.8941	-16075.1
45.1955	-11160.2	45.1955	-13088.2	45.1914	-15945.5	45.1915	-10593.7	45.1915	-11537.3	45.1938	-11777.1	45.1938	-9081.12		45.1955	-11160.2	45.1955	-19439	45.1931	-8356.86	45.1931	-7091.1	45.1955	-9364.22	45.1955	-16176.1	45.1939	-15244	45.1939	-15897.8
45.4951	-10986.5	45.4951	-12917.1	45.491	-15815.3	45.491	-10534.5	45.491	-11163.1	45.4934	-11637.2	45.4934	-8965.51		45.4951	-10986.5	45.4951	-19439	45.4927	-8292.39	45.4927	-7015.08	45.4951	-9252.13	45.4951	-15924.9	45.4934	-15010.8	45.4934	-15726.9
45.7946	-10709.9	45.7946	-12681.5	45.7907	-15562.1	45.7905	-10462.2	45.7905	-10780.8	45.7931	-11437	45.7931	-8820.07		45.7946	-10709.9	45.7946	-19439	45.7923	-8082.22	45.7923	-6804.06	45.7946	-9099.53	45.7946	-15646.9	45.7929	-14727.1	45.7929	-15478.7
46.0944	-10406.3	46.0944	-12402.1	46.0907	-15320.3	46.0902	-10367.6	46.0902	-10927.3	46.0929	-11299	46.0929	-8708.88		46.0944	-10406.3	46.0944	-19439	46.0921	-7991.73	46.0921	-6652.14	46.0944	-9018.79	46.0944	-15352.3	46.0926	-14466.6	46.0926	-15275.8
46.3943	-10054.5	46.3943	-12148.2	46.3906	-15307.3	46.39	-10264	46.39	-11011.9	46.3927	-11112.8	46.3927	-8605.39		46.3943	-10054.5	46.3943	-19439	46.392	-7874.04	46.392	-6487.71	46.3943	-8959.61	46.3943	-15094.9	46.3923	-14132.3	46.3923	-15073.1
46.6941	-10150.7	46.6941	-11939.4	46.6905	-15010.7	46.6897	-10138.9	46.6897	-10962.4	46.6926	-10919.3	46.6926	-8493.8		46.6941	-10150.7	46.6941	-19439	46.6918	-7742.11	46.6918	-6331.25	46.6941	-8858.86	46.6941	-14793.1	46.692	-13812.7	46.692	-14775.8
46.9939	-10092.7	46.9939	-11770.3	46.9904	-14883.2	46.9896	-10008.5	46.9896	-10667.7	46.9924	-10746.6	46.9924	-8347.12		46.9939	-10092.7	46.9939	-19439	46.9915	-7673.84	46.9915	-6163.83	46.9939	-8792	46.9939	-14475.9	46.9917	-13533.4	46.9917	-14519.9
47.294	-9932.33	47.294	-11609.4	47.2906	-14517.5	47.2897	-9852.54	47.2897	-10679.2	47.2925	-10603.9	47.2925	-8217.19		47.294	-9932.33	47.294	-19439	47.2916	-7681.29	47.2916	-5966.66	47.294	-8690.63	47.294	-14177.4	47.2917	-13236.5	47.2917	-14228.7
47.5943	-9805.93	47.5943	-11484.1	47.5911	-14352.2	47.5901	-9726.86	47.5901	-10679.1	47.5929	-10468.5	47.5929	-8068.54		47.5943	-9805.93	47.5943	-19439	47.5918	-7688.96	47.5918	-5787.66	47.5943	-8645.81	47.5943	-13921	47.592	-13006.5	47.592	-13940.1
47.8948	-9601.16	47.8948	-11378.9	47.8918	-14202.3	47.8907	-9593.81	47.8907	-10727	47.8934	-10288	47.8934	-7918.9		47.8948	-9601.16	47.8948	-19439	47.8922	-7594.41	47.8922	-5574.87	47.8948	-8600.23	47.8948	-13679.2	47.8924	-12750.8	47.8924	-13679.7
48.1953	-9577.12	48.1953	-11300	48.1924	-14135.7	48.1913	-9538.13	48.1913	-10731.9	48.1939	-10125.3	48.1939	-7809.59		48.1953	-9577.12	48.1953	-19439	48.1927	-7530.08	48.1927	-5400.81	48.1953	-8483.15	48.1953	-13528.7	48.1927	-12628.4	48.1927	-13463.4
48.4959	-9525.64	48.4959	-11249.5	48.4931	-14067.7	48.4919	-9436.88	48.4919	-10776.7	48.4945	-10020.5	48.4945	-7732.4		48.4959	-9525.64	48.4959	-19439	48.4932	-7460.72	48.4932	-5230.64	48.4959	-8374.56	48.4959	-13340.8	48.4934	-12530.3	48.4934	-13239.2
48.7966	-9427.37	48.7966	-11271.9	48.7939	-13986.2	48.7927	-9329.19	48.7927	-10959.8	48.7952	-9972.67	48.7952	-7665.54		48.7966	-9427.37	48.7966	-19439	48.7939	-7500.53	48.7939	-5244.36	48.7966	-8287.59	48.7966	-13249.9	48.7941	-12561.7	48.7941	-13114.8
49.0969	-9522.69	49.0969	-11285.6	49.0942	-14046.7	49.093	-9309.84	49.093	-10834.1	49.0955	-9920.95	49.0955	-7619.71		49.0969	-9522.69	49.0969	-19439	49.0941	-7496.56	49.0941	-5206.48	49.0969	-8170.48	49.0969	-13305.6	49.0944	-12651.5	49.0944	-13017
49.3968	-9499.65	49.3968	-11359	49.3943	-13911.9	49.393	-9271.74	49.393	-10580.7	49.3954	-9910.55	49.3954	-7595.7		49.3968	-9499.65	49.3968	-19439	49.3941	-7526.44	49.3941	-5203.88	49.3968	-8019.67	49.3968	-13219.8	49.3945	-12645	49.3945	-12925.6
49.6969	-9328.66	49.6969	-11333	49.6946	-13938.3	49.6931	-9213.5	49.6931	-10553.6	49.6954	-9916.07	49.6954	-7571.45		49.6969	-9328.66	49.6969	-19439	49.694	-7507.76	49.694	-5194.59	49.6969	-7861.97	49.6969	-13212	49.6946	-12700.8	49.6946	-12910.2
49.9972	-9279.36	49.9972	-11266	49.995	-13839.6	49.9933	-9211.91	49.9933	-10532.1	49.9956	-9844.37	49.9956	-7576.98		49.9972	-9279.36	49.9972	-19439	49.9943	-7459.97	49.9943	-5159.25	49.9972	-7617.91	49.9972	-13242.5	49.995	-12729.6	49.995	-12862.3
50.2974	-9269.46	50.2974	-11291.2	50.2952	-14090.3	50.2934	-9180.82	50.2934	-10359.7	50.2957	-9812.46	50.2957	-7588.58		50.2974	-9269.46	50.2974	-19439	50.2944	-7424.3	50.2944	-5171.22	50.2974	-7450.61	50.2974	-13273.8	50.2952	-12834.5	50.2952	-12877.7
50.5973	-9227.94	50.5973	-11274.2	50.5951	-13964.3	50.5932	-9124.65	50.5932	-10242	50.5954	-9792.65	50.5954	-7635.46		50.5973	-9227.94	50.5973	-19439	50.5942	-7381.38	50.5942	-5156.13	50.5973	-7244.17	50.5973	-13305.6	50.5952	-12935.5	50.5952	-12968.5
50.897	-9286.03	50.897	-11233.4	50.8947	-13873.4	50.8927	-9096.06	50.8927	-10134.2	50.8949	-9855.57	50.8949	-7680.85		50.897	-9286.03	50.897	-19439	50.8939	-7411.28	50.8939	-5162.03	50.897	-7035.43	50.897	-13416	50.895	-12968.7	50.895	-12958.4
51.1967	-9052.27	51.1967	-11233.1	51.1944	-13736.7	51.1923	-9061.75	51.1923	-10215.4	51.1944	-9885.76	51.1944	-7667.95		51.1967	-9052.27	51.1967	-19439	51.1936	-7386.68	51.1936	-5181.54	51.1967	-6860.75	51.1967	-13445.8	51.1948	-12939.1	51.1948	-13007.9
51.4963	-9121.57	51.4963	-11162.5	51.494	-13617.1	51.4918	-9052.58	51.4918	-10277.9	51.4939	-9867.16	51.4939	-7657.98		51.4963	-9121.57	51.4963	-19439	51.4933	-7374.58	51.4933	-5172.11	51.4963	-6704.19	51.4963	-13543.3	51.4946	-12926.4	51.4946	-13040.8
51.7962	-9222.3	51.7962	-11024.9	51.7938	-13501.3	51.7914	-9041.07	51.7914	-10066.5	51.7937	-9837.78	51.7937	-7649.45		51.7962	-9222.3	51.7962	-19439	51.7932	-7324.76	51.7932	-5080.3	51.7962	-6596.51	51.7962	-13547.2	51.7947	-12813	51.7947	-13029.1
52.0965	-9139.6	52.0965	-10913.5	52.0941	-13459.6	52.0915	-8918.93	52.0915	-9850.11	52.0938	-9807.69	52.0938	-7612.91		52.0965	-9139.6	52.0965	-19439	52.0935	-7276.21	52.0935	-5016.9	52.0965	-6486.11	52.0965	-13465.9	52.0952	-12642.8	52.0952	-13006.5
52.397	-9123.95	52.397	-10791.6	52.3945	-13347.5	52.3918	-8910.49	52.3918	-10069.7	52.3942	-9778.82	52.3942	-7554.44		52.397	-9123.95	52.397	-19439	52.3941	-7204.95	52.3941	-4949.56	52.397	-6365.11	52.397	-13509.5	52.3957	-12664.4	52.3957	-12943.4
52.6973	-9138.97	52.6973	-10776.8	52.6947	-13274.6	52.6921	-8908.88	52.6921	-9974.22	52.6946	-9698.22	52.6946	-7522.49		52.6973	-9138.97	52.6973	-19439	52.6945	-7187.52	52.6945	-4902.96	52.6973	-6352.07	52.6973	-13460.3	52.6962	-12669.2	52.6962	-12869.1
52.9974	-9052.81	52.9974	-10767.3	52.9948	-13207.3	52.9922	-8820.11	52.9922	-9772.97	52.9948	-9675.89	52.9948	-7494.77		52.9974	-9052.81	52.9974	-19439	52.9948	-7220.75	52.9948	-4844.5	52.9974	-6385.58	52.9974	-13397.8	52.9965	-12649.7	52.9965	-12795.9
53.2975	-8901.53	53.2975	-10676.4	53.2949	-12872.6	53.2923	-8801.95	53.2923	-9638.71	53.295	-9615.38	53.295	-7443.94		53.2975	-8901.53	53.2975	-19439	53.295	-7163.45	53.295	-4786.3	53.2975	-6385.89	53.2975	-13341	53.2966	-12550.7	53.2966	-12713.5
53.5977	-8768.02	53.5977	-10591	53.5952	-12893.3	53.5924	-8799.24	53.5924	-9587.57	53.5953	-9562.37	53.5953	-7377.01		53.5977	-8768.02	53.5977	-19439	53.5953	-7105.36	53.5953	-4754.64	53.5977	-6420.87	53.5977	-13321.6	53.5968	-12422	53.5968	-12545.7
53.8979	-8699.26	53.8979	-10493.5	53.8954	-12891.9	53.8926	-8791.33	53.8926	-9399.15	53.8957	-9463.83	53.8957	-7299.51		53.8979	-8699.26	53.8979	-19439	53.8955	-7006.09	53.8955	-4705.93	53.8979	-6470.37	53.8979	-13211.8	53.897	-12395.6	53.897	-12481
54.1979	-8708.25	54.1979	-10336.4	54.1955	-12894.9	54.1926	-8724.6	54.1926	-9205.38	54.1959	-9387.68	54.1959	-7265.52		54.1979	-8708.25	54.1979	-19439	54.1956	-6936.8	54.1956	-4626.16	54.1979	-6518.1	54.1979	-13186.6	54.1969	-12432.6	54.1969	-12353.1
54.4976	-8558.95	54.4976	-10248.1	54.4954	-12817.7	54.4925	-8625.43	54.4925	-9000.92	54.496	-9319.99	54.496	-7202.85		54.4976	-8558.95	54.4976	-19439	54.4954	-6846.99	54.4954	-4596.7	54.4976	-6523.69	54.4976	-13109.9	54.4965	-12416.1	54.4965	-12232.1
54.7972	-8281.68	54.7972	-10234.4	54.795	-12807.2	54.7923	-8544.43	54.7923	-8871.11	54.7959	-9239.82	54.7959	-7145.83		54.7972	-8281.68	54.7972	-19439	54.7949	-6759.85	54.7949	-4561.67	54.7972	-6537.58	54.7972	-13011.9	54.796	-12402.5	54.796	-12140
55.0964	-8192.84	55.0964	-10226.9	55.0944	-12637	55.0917	-8553.11	55.0917	-9012.84	55.0955	-9159.27	55.0955	-7100.96		55.0964	-8192.84	55.0964	-19439	55.0941	-6698.06	55.0941	-4542.31	55.0964	-6564.93	55.0964	-12937.8	55.0951	-12425	55.0951	-12012.6
55.3957	-8063.56	55.3957	-10103.9	55.3939	-12588.7	55.3912	-8443.71	55.3912	-8761.08	55.395	-9041.31	55.395	-7060.47		55.3957	-8063.56	55.3957	-19439	55.3934	-6662.53	55.3934	-4500.04	55.3957	-6592.21	55.3957	-12835.5	55.3945	-12298.7	55.3945	-11917
55.6951	-7815.3	55.6951	-9935.89	55.6934	-12511.1	55.6907	-8329.23	55.6907	-8664.92	55.6946	-9005.88	55.6946	-7007.57		55.6951	-7815.3	55.6951	-19439	55.6927	-6565.88	55.6927	-4449.84	55.6951	-6566.82	55.6951	-12817.5	55.6939	-12172.5	55.6939	-11827.6
55.9944	-7596.24	55.9944	-9760.46	55.9929	-12493.7	55.9901	-8288.13	55.9901	-8841	55.994	-8923.85	55.994	-6911.38		55.9944	-7596.24	55.9944	-19439	55.9919	-6444.16	55.9919	-4427.31	55.9944	-6531.9	55.9944	-12798.9	55.9931	-12072	55.9931	-11727.3
56.2938	-7706.64	56.2938	-9643.13	56.2925	-12465.4	56.2896	-8215.43	56.2896	-8923.19	56.2937	-8857.58	56.2937	-6844.78		56.2938	-7706.64	56.2938	-19439	56.2914	-6408.59	56.2914	-4409.73	56.2938	-6464.66	56.2938	-12723	56.2927	-12039	56.2927	-11633.9
56.5936	-7684.06	56.5936	-9526.36	56.5924	-12316.6	56.5895	-8118.06	56.5895	-8828.74	56.5936	-8774.92	56.5936	-6770.06		56.5936	-7684.06	56.5936	-19439	56.5912	-6331.92	56.5912	-4392.99	56.5936	-6375.91	56.5936	-12589.3	56.5926	-11978.8	56.5926	-11537
56.8936	-7590.84	56.8936	-9430.7	56.8924	-12120.1	56.8895	-8029.84	56.8895	-8869.13	56.8935	-8735.2	56.8935	-6721.96		56.8936	-7590.84	56.8936	-19439	56.8911	-6313.42	56.8911	-4387.38	56.8936	-6279.04	56.8936	-12486	56.8927	-11864.7	56.8927	-11416.2
57.1939	-7534.05	57.1939	-9357.04	57.1927	-12004.8	57.1899	-7960.97	57.1899	-8769.44	57.1938	-8665.32	57.1938	-6644.7		57.1939	-7534.05	57.1939	-19439	57.1915	-6247.08	57.1915	-4392.11	57.1939	-6176.16	57.1939	-12324.7	57.1932	-11617.1	57.1932	-11291.8
57.4944	-7320.98	57.4944	-9229.64	57.4932	-11899.5	57.4904	-7902.44	57.4904	-8714.78	57.4941	-8595.36	57.4941	-6592.86		57.4944	-7320.98	57.4944	-19439	57.4921	-6183.51	57.4921	-4357.57	57.4944	-6163.24	57.4944	-12180.7	57.4939	-11458.7	57.4939	-11192.4
57.795	-7274.89	57.795	-9040.03	57.7937	-11760.1	57.791	-7859.65	57.791	-8769.77	57.7945	-8508.73	57.7945	-6536.72		57.795	-7274.89	57.795	-19439	57.7927	-6151.46	57.7927	-4335.11	57.795	-6095.02	57.795	-12125.2	57.7946	-11346.2	57.7946	-11091.8
58.0957	-7105.08	58.0957	-8846.05	58.0944	-11720.4	58.0916	-7744.18	58.0916	-8576.51	58.095	-8445.64	58.095	-6473.65		58.0957	-7105.08	58.0957	-19439	58.0935	-6073.73	58.0935	-4281.78	58.0957	-6010.28	58.0957	-12025.3	58.0954	-11184.2	58.0954	-10992
58.3962	-7083.11	58.3962	-8770.29	58.3947	-11548.4	58.3921	-7646.75	58.3921	-8519.95	58.3952	-8393.5	58.3952	-6389.24		58.3962	-7083.11	58.3962	-19439	58.3941	-5949.82	58.3941	-4254.25	58.3962	-5942.23	58.3962	-11905.2	58.3958	-11090.5	58.3958	-10867.5
58.6968	-7064.01	58.6968	-8637.54	58.6952	-11355.3	58.6926	-7553.54	58.6926	-8413.83	58.6956	-8256.34	58.6956	-6271		58.6968	-7064.01	58.6968	-19439	58.6948	-5878.17	58.6948	-4209.36	58.6968	-5856.16	58.6968	-11743.1	58.6964	-10916	58.6964	-10698.8
58.9977	-7288.95	58.9977	-8554.85	58.996	-11110.9	58.9934	-7406.86	58.9934	-8161.4	58.9963	-8182.46	58.9963	-6197.95		58.9977	-7288.95	58.9977	-19439	58.9959	-5815.28	58.9959	-4154.37	58.9977	-5772.33	58.9977	-11578	58.9974	-10772.4	58.9974	-10548.4
59.2986	-7004.28	59.2986	-8431.45	59.2968	-10956.5	59.2941	-7276.36	59.2941	-7958.22	59.2968	-8072.62	59.2968	-6101.28		59.2986	-7004.28	59.2986	-19439	59.2968	-5653.28	59.2968	-4096.79	59.2986	-5729.05	59.2986	-11422.4	59.2982	-10599.1	59.2982	-10362.6
59.5991	-6902.48	59.5991	-8251.4	59.5973	-10825.7	59.5946	-7127.86	59.5946	-7846.07	59.5971	-7962.45	59.5971	-6010.81		59.5991	-6902.48	59.5991	-19439	59.5974	-5555	59.5974	-4011.17	59.5991	-5686.07	59.5991	-11309.6	59.5988	-10435.4	59.5988	-10196.2
59.8996	-6757.7	59.8996	-8062.86	59.8977	-10772.5	59.895	-6956.94	59.895	-7782.28	59.8974	-7783.06	59.8974	-5880.07		59.8996	-6757.7	59.8996	-19439	59.8979	-5439.72	59.8979	-3930.55	59.8996	-5658.83	59.8996	-11209.5	59.8993	-10259	59.8993	-10004.8
60.1998	-6698.06	60.1998	-7875.02	60.1979	-10569.5	60.1952	-6801.63	60.1952	-7641.13	60.1974	-7622.06	60.1974	-5757.11		60.1998	-6698.06	60.1998	-19439	60.1982	-5302.38	60.1982	-3853.99	60.1998	-5602.39	60.1998	-11085.5	60.1996	-10204.4	60.1996	-9835.9
60.5	-6640.77	60.5	-7717.38	60.4981	-10360.2	60.4953	-6626.95	60.4953	-7451.35	60.4975	-7454.86	60.4975	-5607.4		60.5	-6640.77	60.5	-19439	60.4984	-5198.77	60.4984	-3778.37	60.5	-5476.49	60.5	-10920.5	60.4998	-10042	60.4998	-9572.2
60.8002	-6637.88	60.8002	-7604.21	60.7983	-10153.5	60.7955	-6414.05	60.7955	-7220.06	60.7975	-7281.79	60.7975	-5454.17		60.8002	-6637.88	60.8002	-19439	60.7987	-5014.98	60.7987	-3699.55	60.8002	-5365.52	60.8002	-10624.6	60.8001	-9814.14	60.8001	-9321.63
61.1004	-6556.13	61.1004	-7423.53	61.0984	-9862.75	61.0957	-6209.36	61.0957	-7048	61.0976	-7045.09	61.0976	-5271		61.1004	-6556.13	61.1004	-19439	61.0989	-4905.06	61.0989	-3615.96	61.1004	-5246.69	61.1004	-10395.8	61.1004	-9576.19	61.1004	-9043.71
61.4008	-6339.66	61.4008	-7193.19	61.3987	-9690.67	61.396	-6012.66	61.396	-6793.72	61.3978	-6813.33	61.3978	-5095.52		61.4008	-6339.66	61.4008	-19439	61.3992	-4763.37	61.3992	-3494.06	61.4008	-5121.86	61.4008	-10124	61.4008	-9306.81	61.4008	-8760.46
61.701	-6335.08	61.701	-7004.48	61.6988	-9417.92	61.6963	-5780.23	61.6963	-6581.62	61.6979	-6605.42	61.6979	-4929.13		61.701	-6335.08	61.701	-19439	61.6993	-4615.89	61.6993	-3392.49	61.701	-4977.66	61.701	-9836.92	61.7011	-9086.37	61.7011	-8459.72
62.0009	-5956.87	62.0009	-6747.44	61.9986	-9101.08	61.9962	-5538.31	61.9962	-6359.32	61.9977	-6330.01	61.9977	-4710.2		62.0009	-5956.87	62.0009	-19439	61.9991	-4417.3	61.9991	-3282.95	62.0009	-4787.73	62.0009	-9515.55	62.0011	-8808.53	62.0011	-8133.69
62.3007	-5710.43	62.3007	-6422.09	62.2982	-8776.06	62.2959	-5225.8	62.2959	-6099.32	62.2974	-6053.25	62.2974	-4489.4		62.3007	-5710.43	62.3007	-19439	62.2987	-4270.43	62.2987	-3150.02	62.3007	-4609.61	62.3007	-9178.51	62.3009	-8510.98	62.3009	-7761.82
62.6004	-5477	62.6004	-6115.02	62.5978	-8377.89	62.5956	-4897.36	62.5956	-5784.2	62.5972	-5734.55	62.5972	-4233.89		62.6004	-5477	62.6004	-19439	62.5983	-4066.42	62.5983	-3022.5	62.6004	-4386.4	62.6004	-8786.67	62.6006	-8170.03	62.6006	-7340.48
62.9002	-5223.04	62.9002	-5801.58	62.8975	-7802.69	62.8953	-4536.67	62.8953	-5365.02	62.897	-5414.94	62.897	-3963.96		62.9002	-5223.04	62.9002	-19439	62.8979	-3807.24	62.8979	-2854.47	62.9002	-4113.28	62.9002	-8311.3	62.9003	-7813.92	62.9003	-6883.73
63.2001	-4821.67	63.2001	-5420.6	63.1974	-7320.49	63.1951	-4125.76	63.1951	-5008.37	63.1969	-5061.14	63.1969	-3662.38		63.2001	-4821.67	63.2001	-19439	63.1977	-3555.05	63.1977	-2665.61	63.2001	-3859.8	63.2001	-7843.28	63.2001	-7337.51	63.2001	-6369.82
63.5	-4600.55	63.5	-4960.71	63.4973	-6853.92	63.4949	-3696.22	63.4949	-4599.17	63.4968	-4699.94	63.4968	-3355.45		63.5	-4600.55	63.5	-19439	63.4974	-3231.14	63.4974	-2479.32	63.5	-3597.6	63.5	-7360.68	63.5	-6900	63.5	-5900.17
63.7999	-4191.8	63.7999	-4403.16	63.7974	-6243.24	63.7947	-3232.68	63.7947	-4051.77	63.7967	-4312.57	63.7967	-3004.12		63.7999	-4191.8	63.7999	-19439	63.7972	-2907.76	63.7972	-2259.99	63.7999	-3328	63.7999	-6914.15	63.7998	-6404.1	63.7998	-5316.16
64.0999	-3715.29	64.0999	-3816.04	64.0975	-5615.61	64.0945	-2703.94	64.0945	-3545.07	64.0968	-3891.79	64.0968	-2638.73		64.0999	-3715.29	64.0999	-19439	64.097	-2465.21	64.097	-2032.65	64.0999	-3016.21	64.0999	-6321.55	64.0998	-5894.28	64.0998	-4715.15
64.3997	-3246.32	64.3997	-3198.74	64.3976	-4915.93	64.3942	-2143.18	64.3942	-2999.8	64.3968	-3431.33	64.3968	-2257.49		64.3997	-3246.32	64.3997	-19439	64.3968	-2082.06	64.3968	-1812.61	64.3997	-2660.14	64.3997	-5738.43	64.3996	-5364.74	64.3996	-4069.59
64.6995	-2546.68	64.6995	-2569.94	64.6977	-4276.12	64.694	-1533.21	64.694	-2392.72	64.6968	-2943.46	64.6968	-1839.52		64.6995	-2546.68	64.6995	-19439	64.6968	-1593.67	64.6968	-1549.34	64.6995	-2312.96	64.6995	-5084.85	64.6994	-4743.49	64.6994	-3401.93
64.9996	-2027.85	64.9996	-1869.61	64.9982	-3597.61	64.9942	-930.293	64.9942	-1736.49	64.9971	-2425.11	64.9971	-1433.01		64.9996	-2027.85	64.9996	-19439	64.997	-1093.14	64.997	-1280.74	64.9996	-2010.36	64.9996	-4383.5	64.9995	-4042.23	64.9995	-2693.65
65.2999	-1618.75	65.2999	-1193.9	65.2988	-2871.5	65.2945	-285.875	65.2945	-1131.9	65.2974	-1905.13	65.2974	-979.609		65.2999	-1618.75	65.2999	-19439	65.2973	-625.551	65.2973	-1008.68	65.2999	-1653.14	65.2999	-3681.87	65.2997	-3295.02	65.2997	-1925.51
65.6002	-984.524	65.6002	-531.603	65.5995	-2033.9	65.595	368.165	65.595	-443.798	65.5978	-1367	65.5978	-496.508		65.6002	-984.524	65.6002	-19439	65.5978	-78.8445	65.5978	-712.843	65.6002	-1316.39	65.6002	-2904.57	65.6	-2518.84	65.6	-1160.97
65.9005	-392.274	65.9005	266.042	65.9	-1295.71	65.8954	1040.09	65.8954	271.648	65.898	-792.454	65.898	-14.8741		65.9005	-392.274	65.9005	-19439	65.8982	443.295	65.8982	-432.126	65.9005	-958.924	65.9005	-2174.86	65.9003	-1756.26	65.9003	-337.965
66.2007	206.407	66.2007	1033.95	66.2004	-469.976	66.1957	1744.01	66.1957	933.986	66.1981	-188.854	66.1981	491.648		66.2007	206.407	66.2007	-19439	66.1984	974.881	66.1984	-136.56	66.2007	-578.93	66.2007	-1375.23	66.2005	-964.769	66.2005	476.724
66.5008	1096.2	66.5008	1794.13	66.5006	413.387	66.4959	2489	66.4959	1694.02	66.4981	474.42	66.4981	1025.79		66.5008	1096.2	66.5008	-19439	66.4986	1479.6	66.4986	193.718	66.5008	-180.555	66.5008	-520.583	66.5005	-122.029	66.5005	1364.15
66.8009	1891.76	66.8009	2586.95	66.8007	1224.68	66.7961	3230.69	66.7961	2202.3	66.7981	1155.17	66.7981	1558.13		66.8009	1891.76	66.8009	-19439	66.7988	1971.8	66.7988	518.724	66.8009	250.759	66.8009	306.572	66.8005	691.42	66.8005	2255.79
67.101	2448.25	67.101	3274.66	67.1007	2078.21	67.0962	3946.5	67.0962	2857.89	67.098	1801.15	67.098	2087.61		67.101	2448.25	67.101	-19439	67.0988	2443.14	67.0988	842.978	67.101	606.751	67.101	1100.33	67.1004	1513.61	67.1004	3148.83
67.4011	3042.51	67.4011	4004	67.4008	2958.62	67.3964	4732.41	67.3964	3417.3	67.398	2465.93	67.398	2647.81		67.4011	3042.51	67.4011	-19439	67.3988	2985.39	67.3988	1183.68	67.4011	921.06	67.4011	1911.39	67.4004	2338.09	67.4004	4039.85
67.7012	3578.14	67.7012	4754.74	67.7007	3895.81	67.6964	5429.59	67.6964	3923.11	67.6979	3122.62	67.6979	3176.35		67.7012	3578.14	67.7012	-19439	67.6988	3452.08	67.6988	1495.96	67.7012	1208.48	67.7012	2649.83	67.7004	3105	67.7004	4910.01
68.001	4185.02	68.001	5451.55	68.0004	4775.94	67.9962	6153.63	67.9962	4450.68	67.9975	3750.34	67.9975	3706.88		68.001	4185.02	68.001	-19439	67.9986	3873.29	67.9986	1797.62	68.001	1522.34	68.001	3309.96	68.0002	3771.87	68.0002	5743.26
68.3008	4780.15	68.3008	6094.11	68.2999	5615	68.2959	6797.97	68.2959	5105.88	68.2972	4371.66	68.2972	4186.23		68.3008	4780.15	68.3008	-19439	68.2984	4343.83	68.2984	2088.05	68.3008	1824.64	68.3008	3978.09	68.3	4415.61	68.3	6429.16
68.6005	5212.04	68.6005	6745.22	68.5995	6293.8	68.5957	7421.16	68.5957	5485.45	68.5969	4916.63	68.5969	4593.07		68.6005	5212.04	68.6005	-19439	68.598	4667.99	68.598	2333.39	68.6005	2056.18	68.6005	4498.43	68.5997	4930.26	68.5997	7057.22
68.9003	5607.04	68.9003	7166.23	68.8992	6936.88	68.8954	7941.35	68.8954	5782.42	68.8967	5387.66	68.8967	4966.21		68.9003	5607.04	68.9003	-19439	68.8978	5000.31	68.8978	2542.82	68.9003	2157.34	68.9003	4985.56	68.8994	5399.79	68.8994	7503
69.2001	5897.97	69.2001	7539.21	69.1988	7455.22	69.1951	8332.49	69.1951	6168.64	69.1966	5735.02	69.1966	5233.17		69.2001	5897.97	69.2001	-19439	69.1975	5165.99	69.1975	2683.71	69.2001	2192.86	69.2001	5295.16	69.1991	5654.08	69.1991	7886.22
69.4998	5854.56	69.4998	7736.6	69.4983	7858.67	69.4948	8557.37	69.4948	6226.6	69.4964	5935.27	69.4964	5393.74		69.4998	5854.56	69.4998	-19439	69.4972	5290.33	69.4972	2750.74	69.4998	2131.35	69.4998	5419.2	69.4988	5815.41	69.4988	8038.77
69.7995	5806.69	69.7995	7720.24	69.7979	8041.23	69.7944	8662.73	69.7944	6407.05	69.7962	5980.82	69.7962	5426.79		69.7995	5806.69	69.7995	-19439	69.7969	5284.57	69.7969	2734.5	69.7995	1945.29	69.7995	5424.63	69.7985	5770.36	69.7985	7964.84
70.0991	5723.11	70.0991	7644.35	70.0974	8021.16	70.094	8575.47	70.094	6358.11	70.096	5874.29	70.096	5337.45		70.0991	5723.11	70.0991	-19439	70.0966	5157.68	70.0966	2647.61	70.0991	1712.27	70.0991	5197.77	70.0982	5540.25	70.0982	7705.86
70.3986	5409.34	70.3986	7240.84	70.3969	7765.84	70.3936	8233.4	70.3936	6183.7	70.3957	5589.23	70.3957	5085.26		70.3986	5409.34	70.3986	-19439	70.3962	4831.6	70.3962	2444.78	70.3986	1428.14	70.3986	4787.88	70.3977	5148.09	70.3977	7164.49
70.6981	4951.44	70.6981	6698.79	70.6965	7189.89	70.6934	7783.4	70.6934	5874.14	70.6955	5153.06	70.6955	4719.95		70.6981	4951.44	70.6981	-19439	70.6959	4370.09	70.6959	2186.86	70.6981	1088.7	70.6981	4236.18	70.6972	4536.56	70.6972	6427.82
70.9979	4325.68	70.9979	5927.79	70.9964	6432.03	70.9933	7149.58	70.9933	5413.78	70.9955	4548.22	70.9955	4216.99		70.9979	4325.68	70.9979	-19439	70.9958	3781.89	70.9958	1857.42	70.9979	618.151	70.9979	3519.46	70.997	3754.64	70.997	5515.99
71.2976	3689.52	71.2976	5022.2	71.2963	5467.48	71.2931	6315.58	71.2931	4603.32	71.2954	3780.3	71.2954	3627.57		71.2976	3689.52	71.2976	-19439	71.2957	3081.52	71.2957	1466.39	71.2976	49.9618	71.2976	2551.42	71.2968	2764.97	71.2968	4466.99
71.5972	2900.13	71.5972	3941.27	71.596	4287.94	71.5928	5324.11	71.5928	3803.22	71.5952	2899.37	71.5952	2942.13		71.5972	2900.13	71.5972	-19439	71.5954	2333.5	71.5954	1021.82	71.5972	-544.563	71.5972	1482.11	71.5965	1709.81	71.5965	3259.4
71.8968	2049.52	71.8968	2832.95	71.8957	2995.39	71.8925	4261.9	71.8925	2930.59	71.8949	1929.91	71.8949	2138.31		71.8968	2049.52	71.8968	-19439	71.8952	1465.12	71.8952	558.991	71.8968	-1074.06	71.8968	337.547	71.8962	581.725	71.8962	2014.03
72.1965	1000.53	72.1965	1604.35	72.1956	1622.86	72.1925	3152.98	72.1925	1956.34	72.1948	926.568	72.1948	1301.49		72.1965	1000.53	72.1965	-19439	72.1951	675.028	72.1951	90.8507	72.1965	-1628.87	72.1965	-823.359	72.196	-521.105	72.196	676.036
72.4964	94.4602	72.4964	427.575	72.4957	114.309	72.4925	2040.29	72.4925	946.909	72.4947	-57.3986	72.4947	476.605		72.4964	94.4602	72.4964	-19439	72.4951	-184.159	72.4951	-376.48	72.4964	-2149.65	72.4964	-1999.68	72.4959	-1703.8	72.4959	-581.979
72.7963	-880.561	72.7963	-758.959	72.7957	-1281.08	72.7926	932.597	72.7926	-151.141	72.7946	-1042.3	72.7946	-313.102		72.7963	-880.561	72.7963	-19439	72.7951	-930.571	72.7951	-793.908	72.7963	-2633.41	72.7963	-3126.47	72.7958	-2810.14	72.7958	-1764.55
73.0963	-1749	73.0963	-1921.33	73.0957	-2618.57	73.0927	-72.2202	73.0927	-1163	73.0947	-1933.58	73.0947	-1041.33		73.0963	-1749	73.0963	-19439	73.0951	-1662.58	73.0951	-1184.87	73.0963	-3038.09	73.0963	-4097.51	73.0959	-3834.83	73.0959	-2882.03
73.3963	-2474.44	73.3963	-2797.84	73.3959	-3769.93	73.3929	-979.694	73.3929	-2093.58	73.3947	-2713.18	73.3947	-1679.15		73.3963	-2474.44	73.3963	-19439	73.3951	-2238.37	73.3951	-1484.85	73.3963	-3422.75	73.3963	-4962.12	73.396	-4761.55	73.396	-3734.19
73.6961	-3133.04	73.6961	-3572.31	73.6958	-4715.6	73.6928	-1782.25	73.6928	-2766.94	73.6947	-3377.22	73.6947	-2242.56		73.6961	-3133.04	73.6961	-19439	73.6949	-2676.51	73.6949	-1716.4	73.6961	-3698.65	73.6961	-5703.83	73.6958	-5477.36	73.6958	-4378.68
73.9959	-3690.35	73.9959	-4133.44	73.9954	-5524.82	73.9925	-2424.81	73.9925	-3478.41	73.9944	-3874.83	73.9944	-2636.8		73.9959	-3690.35	73.9959	-19439	73.9946	-2966.01	73.9946	-1857.35	73.9959	-3819.83	73.9959	-6231.63	73.9955	-5962.04	73.9955	-4868.91
74.2958	-4188.11	74.2958	-4492.27	74.2953	-6090.35	74.2924	-2796.43	74.2924	-3888.09	74.2944	-4175.15	74.2944	-2934.69		74.2958	-4188.11	74.2958	-19439	74.2945	-3123.85	74.2945	-1916.98	74.2958	-3809.73	74.2958	-6476.28	74.2953	-6240.37	74.2953	-5148.8
74.596	-4490.87	74.596	-4645.01	74.5955	-6334.38	74.5926	-2995.7	74.5926	-4120.68	74.5946	-4308.34	74.5946	-3079.35		74.596	-4490.87	74.596	-19439	74.5946	-3208.6	74.5946	-1872.11	74.596	-3677.66	74.596	-6509.26	74.5955	-6395.9	74.5955	-5124.24
74.8962	-4472.44	74.8962	-4643.01	74.8957	-6439.72	74.8927	-3066.2	74.8927	-4220.84	74.895	-4306.98	74.895	-3022.19		74.8962	-4472.44	74.8962	-19439	74.8948	-3125.85	74.8948	-1753.93	74.8962	-3492.32	74.8962	-6428.99	74.8956	-6366.24	74.8956	-4894.95
75.1963	-4164.62	75.1963	-4454.33	75.1957	-6326.78	75.1926	-2957.92	75.1926	-4317.93	75.1952	-4147.11	75.1952	-2850.08		75.1963	-4164.62	75.1963	-19439	75.1948	-2921.5	75.1948	-1555.11	75.1963	-3198.95	75.1963	-6149.82	75.1956	-6213.68	75.1956	-4490.72
75.4961	-3913.92	75.4961	-4074.51	75.4956	-5875.92	75.4924	-2649.54	75.4924	-3971.29	75.4952	-3862.75	75.4952	-2582.68		75.4961	-3913.92	75.4961	-19439	75.4947	-2544.92	75.4947	-1265.27	75.4961	-2798.44	75.4961	-5631.78	75.4955	-5790.28	75.4955	-3875.49
75.796	-3331.89	75.796	-3470.36	75.7956	-5327.97	75.7922	-2186.96	75.7922	-3413.7	75.7952	-3392.11	75.7952	-2177.06		75.796	-3331.89	75.796	-19439	75.7946	-2141.61	75.7946	-930.655	75.796	-2294.98	75.796	-4973.01	75.7954	-5216.5	75.7954	-3091.32
76.0959	-2679.93	76.0959	-2661.97	76.0955	-4534.39	76.092	-1583.72	76.092	-2867.09	76.0952	-2805.23	76.0952	-1682.62		76.0959	-2679.93	76.0959	-19439	76.0946	-1615.38	76.0946	-512.793	76.0959	-1725.85	76.0959	-4219.35	76.0954	-4431.34	76.0954	-2105.81
76.3959	-1917.16	76.3959	-1782.99	76.3954	-3716.44	76.3917	-843.75	76.3917	-2065.69	76.3951	-2113.75	76.3951	-1083.94		76.3959	-1917.16	76.3959	-19439	76.3945	-1001.3	76.3945	-67.3605	76.3959	-1084.67	76.3959	-3357.36	76.3953	-3550.24	76.3953	-1061.36
76.6959	-1066.94	76.6959	-837.865	76.6955	-2743.85	76.6916	29.4929	76.6916	-1427.37	76.6951	-1317.26	76.6951	-387.751		76.6959	-1066.94	76.6959	-19439	76.6946	-414.635	76.6946	336.279	76.6959	-522.99	76.6959	-2408.18	76.6954	-2595.4	76.6954	-102.658
76.996	-28.4551	76.996	162.896	76.9957	-1677.11	76.9917	935.45	76.9917	-657.392	76.9953	-458.127	76.9953	297.962		76.996	-28.4551	76.996	-19439	76.9949	204.613	76.9949	699.729	76.996	-21.2813	76.996	-1645.83	76.9957	-1763.09	76.9957	842.909
77.2961	969.776	77.2961	1079.64	77.2958	-493.433	77.2917	1781.44	77.2917	222.347	77.2953	373.13	77.2953	1003.59		77.2961	969.776	77.2961	-19439	77.295	812.86	77.295	1044.01	77.2961	442.219	77.2961	-1108.93	77.2959	-1099.37	77.2959	1739.41
77.596	1982.78	77.596	2041.5	77.5957	569.745	77.5915	2651.25	77.5915	1060.99	77.5952	1212.57	77.5952	1691.61		77.596	1982.78	77.596	-19439	77.5949	1597.89	77.5949	1375.75	77.596	880.173	77.596	-698.372	77.596	-390.493	77.596	2553.89
77.8959	2756.72	77.8959	3069.19	77.8956	1725.39	77.8914	3562.86	77.8914	1983.38	77.895	2120.7	77.895	2334.69		77.8959	2756.72	77.8959	-19439	77.8947	2250.38	77.8947	1658.68	77.8959	1236.01	77.8959	-300.465	77.896	185.368	77.896	3234.38
78.196	3502.84	78.196	4074.53	78.1958	2809.63	78.1916	4464.68	78.1916	2842.62	78.1951	2953.63	78.1951	2997.06		78.196	3502.84	78.196	-19439	78.1948	2886.27	78.1948	1870.33	78.196	1498.84	78.196	-96.5671	78.1962	670.076	78.1962	3827.37
78.4962	4193.6	78.4962	4890.94	78.496	3704.18	78.4919	5192.87	78.4919	3353.13	78.4951	3722.8	78.4951	3598.8		78.4962	4193.6	78.4962	-19439	78.495	3392.62	78.495	1978.17	78.4962	1579.9	78.4962	-143.28	78.4964	862.048	78.4964	4088.12
78.7964	4547.84	78.7964	5601.66	78.7962	4621.66	78.7921	5762.54	78.7921	3667.92	78.7952	4393.08	78.7952	4049.4		78.7964	4547.84	78.7964	-19439	78.7951	3795.11	78.7951	1990.66	78.7964	1527.96	78.7964	-359.384	78.7966	917.265	78.7966	4143.97
79.0964	4761.63	79.0964	6009.49	79.0962	5190.7	79.0922	6121.09	79.0922	4053.79	79.0952	4864.77	79.0952	4358		79.0964	4761.63	79.0964	-19439	79.0951	4056.79	79.0951	1875.72	79.0964	1281.32	79.0964	-816.815	79.0965	634.211	79.0965	3878.09
79.3964	4780.69	79.3964	6129.67	79.3962	5628.83	79.3923	6281.68	79.3923	4127.91	79.3952	5112.31	79.3952	4461.83		79.3964	4780.69	79.3964	-19439	79.3951	4050.23	79.3951	1654.62	79.3964	919.386	79.3964	-1448.82	79.3964	187.372	79.3964	3302.3
79.6965	4585.29	79.6965	6056.02	79.6962	5743.4	79.6924	6151.01	79.6924	3997.15	79.6952	5104.84	79.6952	4404.19		79.6965	4585.29	79.6965	-19439	79.6951	4042.33	79.6951	1421.99	79.6965	545.031	79.6965	-2354.07	79.6963	-553.792	79.6963	2650.96
79.9963	3999.14	79.9963	5684.99	79.9959	5679.97	79.9923	5812.16	79.9923	3776.69	79.9951	4854.41	79.9951	4174.44		79.9963	3999.14	79.9963	-19439	79.9949	3844.59	79.9949	1163.29	79.9963	120.203	79.9963	-3052.03	79.996	-1306.6	79.996	1911.56
80.296	3468.78	80.296	5287.22	80.2955	5170.37	80.2921	5304.01	80.2921	3237.6	80.2948	4478.88	80.2948	3791		80.296	3468.78	80.296	-19439	80.2946	3527.02	80.2946	822.044	80.296	-409.706	80.296	-3548.3	80.2954	-1867.06	80.2954	1087.86
80.5957	2792	80.5957	4573.26	80.5952	4585.35	80.592	4576.96	80.592	2722.9	80.5945	3901.84	80.5945	3299.03		80.5957	2792	80.5957	-19439	80.5943	2881.02	80.5943	380.78	80.5957	-1056.57	80.5957	-4080.69	80.5949	-2575.2	80.5949	25.0968
80.8954	1810.37	80.8954	3533.51	80.8948	3700.84	80.8918	3643.03	80.8918	1766.31	80.8943	3022.79	80.8943	2624.8		80.8954	1810.37	80.8954	-19439	80.8941	2195.12	80.8941	-112.051	80.8954	-1699.26	80.8954	-4720.22	80.8944	-3346.53	80.8944	-1140.85
81.195	752.117	81.195	2309.43	81.1942	2561.34	81.1914	2466.68	81.1914	981.242	81.1939	2043.29	81.1939	1774.33		81.195	752.117	81.195	-19439	81.1938	1295.5	81.1938	-606.172	81.195	-2323.21	81.195	-5330.07	81.1939	-4124.29	81.1939	-2360.33
81.4946	-119.523	81.4946	1077.29	81.4938	1365.84	81.4911	1254.7	81.4911	123.706	81.4936	960.144	81.4936	848.079		81.4946	-119.523	81.4946	-19439	81.4936	416.207	81.4936	-1092.8	81.4946	-2859.57	81.4946	-5874.19	81.4935	-4779.57	81.4935	-3435.4
81.7944	-1190.12	81.7944	-342.865	81.7935	-52.6548	81.791	62.726	81.791	-753.667	81.7934	-241.771	81.7934	-76.5995		81.7944	-1190.12	81.7944	-19439	81.7935	-494.218	81.7935	-1537.17	81.7944	-3380.64	81.7944	-6425.15	81.7933	-5509.4	81.7933	-4520.49
82.0944	-2259.76	82.0944	-1658.34	82.0935	-1428.63	82.0911	-1080.27	82.0911	-1721.21	82.0934	-1374.98	82.0934	-958.855		82.0944	-2259.76	82.0944	-19439	82.0937	-1296.29	82.0937	-1947.95	82.0944	-3768.48	82.0944	-6789.69	82.0934	-6040.14	82.0934	-5475.58
82.3946	-3180.6	82.3946	-2796.09	82.3937	-2756.21	82.3915	-2180.34	82.3915	-2755.1	82.3936	-2401.71	82.3936	-1758.58		82.3946	-3180.6	82.3946	-19439	82.3941	-1994.76	82.3941	-2279.66	82.3946	-4104.72	82.3946	-7145.71	82.3938	-6560.98	82.3938	-6197.84
82.6948	-3947.03	82.6948	-3863.1	82.694	-3954.39	82.6918	-3139.8	82.6918	-3364.28	82.6938	-3269.38	82.6938	-2514.95		82.6948	-3947.03	82.6948	-19439	82.6944	-2715.89	82.6944	-2576.17	82.6948	-4390.01	82.6948	-7254.65	82.6942	-6848.84	82.6942	-6817.65
82.9952	-4546.41	82.9952	-4680.78	82.9945	-5076.48	82.9923	-3938	82.9923	-4019.57	82.9941	-4027.73	82.9941	-3139.54		82.9952	-4546.41	82.9952	-19439	82.995	-3314.37	82.995	-2834.36	82.9952	-4603.97	82.9952	-7506.59	82.9949	-7078.6	82.9949	-7317.38
83.2958	-5104.87	83.2958	-5487.69	83.2953	-5951.11	83.2929	-4577.47	83.2929	-4415.08	83.2945	-4703.91	83.2945	-3654.04		83.2958	-5104.87	83.2958	-19439	83.2957	-3860.23	83.2957	-3025.02	83.2958	-4737.19	83.2958	-7812.29	83.2957	-7415.07	83.2957	-7763.14
83.5965	-5682.75	83.5965	-6076.39	83.5961	-6708.08	83.5935	-5093	83.5935	-5089.72	83.595	-5207.65	83.595	-4103.46		83.5965	-5682.75	83.5965	-19439	83.5965	-4192.92	83.5965	-3150.68	83.5965	-4754.75	83.5965	-7986.1	83.5966	-7606.89	83.5966	-8031.01
83.897	-5717.69	83.897	-6477.35	83.8968	-7291.51	83.894	-5469.62	83.894	-5360.28	83.8955	-5539.78	83.8955	-4406.02		83.897	-5717.69	83.897	-19439	83.8971	-4412.65	83.8971	-3224.61	83.897	-4820.81	83.897	-8114.83	83.8972	-7783.05	83.8972	-8162.33
84.1974	-5963.63	84.1974	-6750.6	84.1975	-7661.41	84.1944	-5695.98	84.1944	-5735.12	84.1959	-5778.04	84.1959	-4601.57		84.1974	-5963.63	84.1974	-19439	84.1976	-4486.55	84.1976	-3277.32	84.1974	-4829.71	84.1974	-8165.92	84.1977	-7870.17	84.1977	-8262.18
84.4977	-6295.78	84.4977	-6953.99	84.498	-8005.4	84.4947	-5814.36	84.4947	-5824.55	84.4961	-5923.53	84.4961	-4702.6		84.4977	-6295.78	84.4977	-19439	84.4979	-4577.62	84.4979	-3304.15	84.4977	-4868.36	84.4977	-8179.77	84.498	-7984.6	84.498	-8360.68
84.7979	-6207.67	84.7979	-6949.19	84.7985	-8216.39	84.7948	-5878.83	84.7948	-5820.8	84.7962	-5947.78	84.7962	-4758.31		84.7979	-6207.67	84.7979	-19439	84.7982	-4558.55	84.7982	-3312.71	84.7979	-4827.56	84.7979	-8077.05	84.7981	-7997.49	84.7981	-8339.41
85.098	-6003.34	85.098	-6869.7	85.0988	-8310.95	85.0948	-5920.81	85.0948	-5847	85.0962	-5919.4	85.0962	-4786.46		85.098	-6003.34	85.098	-19439	85.0983	-4632.86	85.0983	-3280.17	85.098	-4813.55	85.098	-8076.68	85.0981	-8002.78	85.0981	-8219.56
85.3979	-5824.37	85.3979	-6858.28	85.3988	-8450.56	85.3946	-5879.83	85.3946	-5752.94	85.3961	-5888.42	85.3961	-4780.34		85.3979	-5824.37	85.3979	-19439	85.3983	-4629.5	85.3983	-3273.76	85.3979	-4763.96	85.3979	-7973.43	85.3978	-7926.53	85.3978	-8194.27
85.6977	-5641.73	85.6977	-6775.72	85.6988	-8479.83	85.6943	-5826.5	85.6943	-5924.41	85.696	-5904.85	85.696	-4739.51		85.6977	-5641.73	85.6977	-19439	85.6982	-4551.85	85.6982	-3276.57	85.6977	-4754.91	85.6977	-7973.43	85.6974	-7923.69	85.6974	-8176.97
85.9974	-5478.15	85.9974	-6764.54	85.9986	-8545.34	85.9939	-5804.62	85.9939	-5796.98	85.9958	-5879.71	85.9958	-4714.18		85.9974	-5478.15	85.9974	-19439	85.9981	-4480.33	85.9981	-3261.64	85.9974	-4765.85	85.9974	-7890.91	85.997	-7934.64	85.997	-8193.26
86.297	-5488.91	86.297	-6716.76	86.2983	-8519.62	86.2935	-5794.98	86.2935	-5997.21	86.2956	-5823.09	86.2956	-4677.1		86.297	-5488.91	86.297	-19439	86.2978	-4363.03	86.2978	-3254.93	86.297	-4764.68	86.297	-7785.02	86.2966	-7868.4	86.2966	-8176.83
86.5967	-5280.2	86.5967	-6683.96	86.598	-8605.89	86.5932	-5749.6	86.5932	-5864.62	86.5954	-5821.33	86.5954	-4634.96		86.5967	-5280.2	86.5967	-19439	86.5975	-4387.94	86.5975	-3257.38	86.5967	-4818.47	86.5967	-7751.16	86.5962	-7923.96	86.5962	-8177.62
86.8965	-5447.84	86.8965	-6621.43	86.8978	-8702.38	86.8931	-5723.09	86.8931	-5699.99	86.8953	-5776.12	86.8953	-4602.91		86.8965	-5447.84	86.8965	-19439	86.8974	-4390.69	86.8974	-3237.52	86.8965	-4731.11	86.8965	-7682.85	86.8961	-7821.55	86.8961	-8146.67
87.1967	-5220.86	87.1967	-6525.35	87.1979	-8716.38	87.1932	-5651.38	87.1932	-5705.92	87.1955	-5687.26	87.1955	-4555.92		87.1967	-5220.86	87.1967	-19439	87.1976	-4365.03	87.1976	-3217.14	87.1967	-4714.83	87.1967	-7629.62	87.1962	-7799.8	87.1962	-8073.75
87.497	-5041.2	87.497	-6460.88	87.4981	-8684.19	87.4934	-5629.4	87.4934	-5854.87	87.4958	-5650.37	87.4958	-4532.38		87.497	-5041.2	87.497	-19439	87.4979	-4313.85	87.4979	-3175.82	87.497	-4652.44	87.497	-7567.27	87.4965	-7722.84	87.4965	-7999.97
87.7971	-4981.1	87.7971	-6428.47	87.7981	-8723.68	87.7936	-5619.9	87.7936	-6012.85	87.796	-5617.06	87.796	-4500.31		87.7971	-4981.1	87.7971	-19439	87.798	-4285.06	87.798	-3158.37	87.7971	-4656.76	87.7971	-7579.01	87.7967	-7624.87	87.7967	-7936.88
88.0971	-5015.82	88.0971	-6416.61	88.098	-8734.16	88.0937	-5556.78	88.0937	-6006.59	88.0961	-5625.84	88.0961	-4483.92		88.0971	-5015.82	88.0971	-19439	88.0981	-4190.12	88.0981	-3136.36	88.0971	-4629.26	88.0971	-7523.29	88.0968	-7562.18	88.0968	-7939.24
88.397	-5233.4	88.397	-6386.94	88.3978	-8678.01	88.3937	-5535.94	88.3937	-5959.5	88.396	-5622.82	88.396	-4469.6		88.397	-5233.4	88.397	-19439	88.3979	-4081.19	88.3979	-3114.48	88.397	-4651.85	88.397	-7494.66	88.3967	-7553.24	88.3967	-7905.06
88.697	-5347.66	88.697	-6380.57	88.6976	-8661.77	88.6937	-5495.68	88.6937	-5743.24	88.6959	-5552.53	88.6959	-4447.77		88.697	-5347.66	88.697	-19439	88.6978	-4106.08	88.6978	-3091.07	88.697	-4608.88	88.697	-7392.96	88.6967	-7472.55	88.6967	-7819.91
88.9971	-5316.11	88.9971	-6341.99	88.9975	-8554.35	88.9936	-5437.92	88.9936	-5920.19	88.9959	-5484.43	88.9959	-4428.44		88.9971	-5316.11	88.9971	-19439	88.9977	-4115.04	88.9977	-3099.69	88.9971	-4564.88	88.9971	-7322.51	88.9966	-7345.58	88.9966	-7759.28
89.297	-5286.68	89.297	-6323.32	89.2971	-8567.12	89.2933	-5406.95	89.2933	-5697.77	89.2956	-5488.63	89.2956	-4427.93		89.297	-5286.68	89.297	-19439	89.2974	-4176.64	89.2974	-3099.53	89.297	-4545.88	89.297	-7318.2	89.2963	-7323.32	89.2963	-7714.88
89.5967	-5298.83	89.5967	-6287.23	89.5965	-8457.57	89.5928	-5358.91	89.5928	-5663.03	89.595	-5406.47	89.595	-4397.42		89.5967	-5298.83	89.5967	-19439	89.5969	-4082.35	89.5969	-3091.24	89.5967	-4495.46	89.5967	-7275.02	89.5958	-7213.82	89.5958	-7650.86
89.8962	-5103.74	89.8962	-6258.58	89.8958	-8277.81	89.8922	-5325.28	89.8922	-5856.04	89.8943	-5408.56	89.8943	-4367.66		89.8962	-5103.74	89.8962	-19439	89.8963	-4027.58	89.8963	-3088.83	89.8962	-4534.93	89.8962	-7233.9	89.8951	-7161.74	89.8951	-7607.05
90.1956	-5152.54	90.1956	-6263.14	90.195	-8213.33	90.1914	-5338.57	90.1914	-5762.25	90.1935	-5425.77	90.1935	-4367.29		90.1956	-5152.54	90.1956	-19439	90.1955	-4054.71	90.1955	-3078.05	90.1956	-4516.17	90.1956	-7181.4	90.1943	-7088.52	90.1943	-7582.36
90.4949	-5222.84	90.4949	-6227.71	90.4941	-8139.69	90.4906	-5325.11	90.4906	-5542.79	90.4927	-5379.58	90.4927	-4339.11		90.4949	-5222.84	90.4949	-19439	90.4947	-4049.26	90.4947	-3071.7	90.4949	-4503.25	90.4949	-7150.23	90.4934	-7060.98	90.4934	-7506.4
90.7942	-5351.98	90.7942	-6216.51	90.7933	-7961.57	90.7898	-5332.47	90.7898	-5435.74	90.7919	-5372.44	90.7919	-4338.33		90.7942	-5351.98	90.7942	-19439	90.794	-4059.47	90.794	-3058.6	90.7942	-4462.17	90.7942	-7116.03	90.7926	-7043.78	90.7926	-7493.45
91.0936	-5266.76	91.0936	-6231.24	91.0926	-7780.21	91.0891	-5349.37	91.0891	-5421.27	91.0911	-5338.86	91.0911	-4323.82		91.0936	-5266.76	91.0936	-19439	91.0932	-4046.7	91.0932	-3085.92	91.0936	-4468.05	91.0936	-7078.78	91.0918	-7027.59	91.0918	-7475.07
91.3931	-4956.05	91.3931	-6161.23	91.3921	-7574.93	91.3885	-5333.91	91.3885	-5378.36	91.3905	-5291.89	91.3905	-4317.08		91.3931	-4956.05	91.3931	-19439	91.3927	-4162.33	91.3927	-3094.83	91.3931	-4426.44	91.3931	-7021.99	91.3913	-6938.58	91.3913	-7393.1
91.6928	-4862.76	91.6928	-6126.76	91.6918	-7418.62	91.6881	-5343.78	91.6881	-5531.32	91.6901	-5286.66	91.6901	-4317.59		91.6928	-4862.76	91.6928	-19439	91.6922	-4174.64	91.6922	-3099.5	91.6928	-4431.4	91.6928	-7016.78	91.691	-6888.83	91.691	-7398.61
91.9922	-4913.22	91.9922	-6125.69	91.9916	-7364.02	91.9879	-5395.67	91.9879	-5420.1	91.9897	-5314.86	91.9897	-4303.1		91.9922	-4913.22	91.9922	-19439	91.9918	-4186.65	91.9918	-3092.89	91.9922	-4437.88	91.9922	-7047.25	91.9905	-6934.56	91.9905	-7377.37
92.2918	-4852.95	92.2918	-6093.99	92.2916	-7213.91	92.2879	-5425.3	92.2879	-5584.64	92.2896	-5296.09	92.2896	-4293.23		92.2918	-4852.95	92.2918	-19439	92.2916	-4154.38	92.2916	-3091.49	92.2918	-4423.44	92.2918	-7023.34	92.2902	-6896.44	92.2902	-7349.89
92.5916	-4889.19	92.5916	-6100.13	92.5918	-7135.91	92.5881	-5519.63	92.5881	-5580.53	92.5898	-5356.89	92.5898	-4313.84		92.5916	-4889.19	92.5916	-19439	92.5917	-4182.52	92.5917	-3092.22	92.5916	-4420.7	92.5916	-7005	92.5901	-6915.11	92.5901	-7332.77
92.8914	-5119.14	92.8914	-6105.95	92.8921	-7098.95	92.8884	-5526.6	92.8884	-5483.14	92.8901	-5335.19	92.8901	-4341.93		92.8914	-5119.14	92.8914	-19439	92.8918	-4256.75	92.8918	-3114.05	92.8914	-4379.96	92.8914	-6991.37	92.89	-6950.3	92.89	-7333.01
93.1912	-5175.27	93.1912	-6099.09	93.1923	-7039.32	93.1886	-5544.55	93.1886	-5428.5	93.1903	-5377.72	93.1903	-4340.96		93.1912	-5175.27	93.1912	-19439	93.1919	-4268.61	93.1919	-3152.54	93.1912	-4389.11	93.1912	-7019.07	93.1899	-6956.29	93.1899	-7343.38
93.4909	-5000.96	93.4909	-6144.16	93.4924	-6956.08	93.4887	-5536.18	93.4887	-5638.16	93.4905	-5422.2	93.4905	-4365.95		93.4909	-5000.96	93.4909	-19439	93.492	-4310.41	93.492	-3204.81	93.4909	-4432.37	93.4909	-7016.6	93.4898	-6931.71	93.4898	-7364.78
93.7908	-4888.31	93.7908	-6154.14	93.7928	-6891.02	93.7891	-5489.17	93.7891	-5651.9	93.7909	-5406.41	93.7909	-4358.95		93.7908	-4888.31	93.7908	-19439	93.7924	-4346.37	93.7924	-3245.83	93.7908	-4444.51	93.7908	-6943.03	93.7899	-6887.01	93.7899	-7325.01
94.091	-5056.52	94.091	-6177.62	94.0935	-6955.56	94.0896	-5491.8	94.0896	-5662.7	94.0917	-5407.8	94.0917	-4346.79		94.091	-5056.52	94.091	-19439	94.093	-4436.66	94.093	-3251.19	94.091	-4443.1	94.091	-6890.25	94.0902	-6883.84	94.0902	-7293.95
94.3912	-5234.43	94.3912	-6239.83	94.3939	-6998.83	94.39	-5541.87	94.39	-5710.07	94.3924	-5424.91	94.3924	-4330.54		94.3912	-5234.43	94.3912	-19439	94.3936	-4386.09	94.3936	-3259.52	94.3912	-4442.87	94.3912	-6886.02	94.3904	-6853.88	94.3904	-7303.05
94.6911	-5306.25	94.6911	-6284.24	94.6941	-7012.29	94.6902	-5561.08	94.6902	-5671.82	94.6929	-5481.79	94.6929	-4331.77		94.6911	-5306.25	94.6911	-19439	94.6939	-4363.14	94.6939	-3288.96	94.6911	-4457.58	94.6911	-6910.18	94.6904	-6924.24	94.6904	-7296.89
94.9913	-5321.13	94.9913	-6299.44	94.9942	-6925.44	94.9903	-5522.37	94.9903	-5640.99	94.9933	-5499.5	94.9933	-4349.41		94.9913	-5321.13	94.9913	-19439	94.9943	-4342.38	94.9943	-3319.98	94.9913	-4458.64	94.9913	-6825.49	94.9906	-6873.37	94.9906	-7305.25
95.2917	-5268.55	95.2917	-6348.35	95.2943	-6916.37	95.2904	-5483.52	95.2904	-5583.63	95.2936	-5502.26	95.2936	-4336.95		95.2917	-5268.55	95.2917	-19439	95.2947	-4352.24	95.2947	-3342.99	95.2917	-4487.13	95.2917	-6797	95.2912	-6870.1	95.2912	-7315.3
95.592	-5370.4	95.592	-6370.92	95.5944	-6877.72	95.5903	-5389.06	95.5903	-5639.81	95.5939	-5506.17	95.5939	-4332.09		95.592	-5370.4	95.592	-19439	95.5951	-4378	95.5951	-3362.02	95.592	-4523.94	95.592	-6833.57	95.5916	-6819.34	95.5916	-7308.26
95.8924	-5219.82	95.8924	-6406.69	95.8946	-6832.87	95.8903	-5401.5	95.8903	-5642.97	95.8942	-5533.77	95.8942	-4330.12		95.8924	-5219.82	95.8924	-19439	95.8954	-4347.53	95.8954	-3352.58	95.8924	-4548.86	95.8924	-6831.76	95.892	-6729	95.892	-7298.32
96.1924	-5211.04	96.1924	-6407.04	96.1945	-6765.31	96.1899	-5368.17	96.1899	-5762.77	96.1941	-5513.35	96.1941	-4316.9		96.1924	-5211.04	96.1924	-19439	96.1953	-4356.77	96.1953	-3323.82	96.1924	-4568.1	96.1924	-6844.61	96.1921	-6652.02	96.1921	-7238.01
