# Supplementary material for: Development and biophysical characterization of a humanized FSH–blocking monoclonal antibody therapeutic formulated at an ultra-high concentration
Source: eLife. 2023 Jun 19;12:e88898. doi: 10.7554/eLife.88898 (PMC10325703; doi:10.7554/eLife.88898)
Supplement: Figure 6—source data 1. [file elife-88898-fig6-data1.xlsx]

## Sheet: Figure 6A
Figure 6A:Thermal Stability of Formulated MS-Hu6 for up to 90 days (Protein Thermal Shift Assays)
4 °C											25 °C
0 Day		15 Days		30 Days		60 Days		90 Days			0 Day		15 Days		30 Days		60 Days		90 Days
Temp (°C)	dF/dT	Temp (°C)	dF/dT	Temp (°C)	dF/dT	Temp (°C)	dF/dT	Temp (°C)	dF/dT		Temp (°C)	dF/dT	Temp (°C)	dF/dT	Temp (°C)	dF/dT	Temp (°C)	dF/dT	Temp (°C)	dF/dT
28.3808	-18775.3	28.3838	-12419.4	28.3841	-11765.4	28.3867	-14873.1	28.3836	-9679.03		28.3808	-18775.3	28.3826	-5216.26	28.3846	-7583.78	28.3825	-8342.95	28.3849	-2743.7
28.6804	-19019.2	28.6827	-12391.2	28.6833	-11435.5	28.6868	-14634.3	28.682	-9521.97		28.6804	-19019.2	28.6816	-5118.27	28.6842	-7674.76	28.6818	-8171.81	28.683	-2691.8
28.9802	-19301.2	28.9816	-12405.1	28.9826	-11238.4	28.9867	-14622.3	28.9804	-9347.95		28.9802	-19301.2	28.9804	-5023.59	28.9839	-7774.14	28.9812	-8036.73	28.9809	-2638.34
29.2804	-19225.5	29.2808	-12371.8	29.2817	-11126	29.2866	-14623.5	29.2791	-9217.58		29.2804	-19225.5	29.2795	-4957.5	29.2835	-7936.61	29.2806	-7910.01	29.2792	-2576.89
29.5807	-19335.9	29.5806	-12366.9	29.5805	-11095.1	29.5862	-14506.9	29.5781	-9100.87		29.5807	-19335.9	29.5789	-4887	29.5829	-8092.83	29.58	-7751.06	29.5778	-2504.93
29.8809	-19331.4	29.8805	-12439.4	29.8793	-11112.1	29.8857	-14533.6	29.8775	-8978.57		29.8809	-19331.4	29.8786	-4809.78	29.8824	-8167.68	29.8795	-7631.14	29.877	-2442.68
30.1809	-19439	30.1805	-12503.4	30.1781	-11084.6	30.185	-14507.8	30.1773	-8892.7		30.1809	-19439	30.1785	-4791.83	30.1819	-8312.63	30.179	-7511.83	30.1765	-2384.21
30.4808	-19285.4	30.4805	-12541	30.4766	-11068.3	30.4843	-14478.5	30.4771	-8777.18		30.4808	-19285.4	30.4785	-4720.42	30.4808	-8539.26	30.4785	-7349.34	30.476	-2321.76
30.7809	-19264.1	30.7806	-12693	30.7748	-10963.8	30.7836	-14378.9	30.7773	-8716.39		30.7809	-19264.1	30.7784	-4664.19	30.7791	-8659.63	30.7783	-7172.99	30.776	-2253.72
31.0809	-19241.8	31.0805	-12780.5	31.073	-11021.4	31.0827	-14328.6	31.0775	-8702.13		31.0809	-19241.8	31.0781	-4638.04	31.0772	-8739.92	31.0783	-7022.29	31.0762	-2200.9
31.3804	-19198.4	31.3807	-12891.8	31.3708	-11117.6	31.3818	-14302.1	31.3773	-8650.38		31.3804	-19198.4	31.378	-4556.43	31.3749	-8726.88	31.3785	-6831.23	31.3764	-2136.73
31.6798	-19096	31.6809	-12995.1	31.6679	-11214.3	31.6807	-14284.4	31.6771	-8644.27		31.6798	-19096	31.6779	-4555.19	31.6722	-8747.86	31.6785	-6644.39	31.6765	-2087.75
31.9791	-18999.2	31.9807	-13055	31.9649	-11258.7	31.9795	-14170.8	31.9768	-8665.23		31.9791	-18999.2	31.9774	-4563.81	31.9692	-8672.13	31.9784	-6484.08	31.9766	-2038.18
32.2779	-18924.2	32.2798	-13178.7	32.2624	-11301.7	32.2784	-14098.6	32.2763	-8625.7		32.2779	-18924.2	32.2763	-4508.47	32.2667	-8562.92	32.2784	-6325.77	32.2767	-1990.52
32.5761	-18642.4	32.5784	-13281.1	32.5607	-11263.9	32.5773	-14106.1	32.5758	-8600.15		32.5761	-18642.4	32.5748	-4530.48	32.5647	-8503.76	32.5782	-6182.13	32.5767	-1948.62
32.8742	-18389.4	32.8767	-13307.8	32.8594	-11190.7	32.8762	-13990.3	32.8752	-8615.91		32.8742	-18389.4	32.873	-4521.75	32.863	-8450.46	32.878	-5987.12	32.8765	-1905.48
33.1728	-18162.5	33.1748	-13333.6	33.159	-11130	33.1754	-13911.8	33.1747	-8615.24		33.1728	-18162.5	33.1709	-4482.43	33.1622	-8352.92	33.178	-5801.92	33.1764	-1850.46
33.4716	-18074.9	33.4726	-13393.9	33.4595	-11070.9	33.4745	-13882.7	33.4745	-8631.8		33.4716	-18074.9	33.4687	-4468.78	33.4625	-8244.65	33.4778	-5681.88	33.4767	-1801.45
33.7704	-17922.5	33.7705	-13312.4	33.7609	-11067	33.7737	-13815.7	33.7743	-8674.2		33.7704	-17922.5	33.7667	-4440.85	33.7638	-8129.62	33.7772	-5577.15	33.777	-1760
34.0693	-17665.6	34.0685	-13296.9	34.0629	-10983.8	34.0731	-13839.8	34.0744	-8673.49		34.0693	-17665.6	34.0648	-4439.15	34.0659	-8008.41	34.0766	-5461.24	34.0773	-1712.36
34.3689	-17555.4	34.3664	-13210.9	34.3658	-10844.8	34.3726	-13754.3	34.3751	-8682.2		34.3689	-17555.4	34.363	-4440.06	34.3688	-7911.17	34.3759	-5357.76	34.3781	-1669.12
34.6691	-17414.5	34.6651	-13039.2	34.6697	-10760.6	34.6725	-13742.9	34.6762	-8692.19		34.6691	-17414.5	34.6618	-4365.81	34.6727	-7797.55	34.6756	-5254.06	34.6793	-1620.74
34.9686	-17281.3	34.9649	-12965.5	34.9742	-10724.1	34.9728	-13677.7	34.9777	-8713.65		34.9686	-17281.3	34.962	-4329.86	34.9771	-7841.36	34.9756	-5116.7	34.981	-1574.68
35.2681	-17125.5	35.2658	-12785.6	35.2784	-10662.8	35.2735	-13569.2	35.2797	-8782.8		35.2681	-17125.5	35.2632	-4345.21	35.2812	-7849.71	35.2758	-4989.13	35.2829	-1531.12
35.5685	-17135.4	35.5674	-12742.1	35.5821	-10583	35.5745	-13475.3	35.5819	-8842.09		35.5685	-17135.4	35.5653	-4278.41	35.5849	-7815.68	35.5766	-4873.15	35.5852	-1486.92
35.8692	-17089.8	35.8694	-12621	35.8855	-10594.4	35.8757	-13452.5	35.8844	-8900.61		35.8692	-17089.8	35.8674	-4242.01	35.8883	-7749.38	35.8776	-4809.84	35.8877	-1447.92
36.1698	-16897.3	36.1719	-12535.3	36.1883	-10580.6	36.1766	-13335	36.1866	-8938.89		36.1698	-16897.3	36.1696	-4206.09	36.191	-7686.36	36.1783	-4702	36.1898	-1417.34
36.4706	-16744.9	36.475	-12421.3	36.4905	-10610.7	36.4778	-13225.1	36.4884	-9003.95		36.4706	-16744.9	36.4722	-4171.64	36.4932	-7598.55	36.4796	-4565.64	36.4916	-1381.62
36.7715	-16616.5	36.778	-12368.6	36.7924	-10610.7	36.7793	-13166.9	36.7902	-8997.26		36.7715	-16616.5	36.7748	-4147.1	36.795	-7532.13	36.7814	-4461.06	36.7932	-1342.61
37.0729	-16577.6	37.0812	-12331.1	37.0938	-10614.4	37.0807	-13018.4	37.0918	-9022.15		37.0729	-16577.6	37.0774	-4120.74	37.0962	-7404.35	37.0834	-4358.16	37.0948	-1306.03
37.3741	-16445.9	37.3845	-12297.3	37.3951	-10629	37.3819	-12951.2	37.3933	-9056.7		37.3741	-16445.9	37.3801	-4075.32	37.3971	-7383.51	37.3851	-4296.98	37.3961	-1275
37.6749	-16241.4	37.6873	-12371.6	37.696	-10662.6	37.6828	-12833.2	37.6943	-9068.5		37.6749	-16241.4	37.6825	-4084.4	37.6977	-7394.4	37.6864	-4236.9	37.6969	-1244.22
37.9771	-15969.1	37.9891	-12348.8	37.9966	-10684.4	37.9835	-12739	37.9947	-9076.99		37.9771	-15969.1	37.9838	-4029.44	37.9979	-7260.37	37.9877	-4200.87	37.9971	-1214.43
38.2805	-15935.7	38.2902	-12440.6	38.2972	-10692.9	38.2844	-12711.6	38.2949	-9057.73		38.2805	-15935.7	38.2843	-3961.71	38.2983	-7101.12	38.2891	-4163.79	38.2971	-1184.95
38.5836	-15750.5	38.591	-12378.6	38.5981	-10752	38.5849	-12582.6	38.5947	-9029.58		38.5836	-15750.5	38.5846	-3930.02	38.599	-6988.23	38.5902	-4118.05	38.5967	-1154.22
38.8864	-15619.6	38.8917	-12469.7	38.899	-10729.6	38.8854	-12458.2	38.8941	-9000.98		38.8864	-15619.6	38.8855	-3883.97	38.8998	-6944.24	38.8911	-4081.81	38.896	-1120.93
39.1892	-15603.6	39.1922	-12504.8	39.2	-10782.9	39.1863	-12371.8	39.1939	-8974.79		39.1892	-15603.6	39.1868	-3826.44	39.2007	-6877.45	39.1924	-4067.67	39.1958	-1087.73
39.4915	-15434.3	39.4925	-12570.9	39.5009	-10789.6	39.4875	-12271.1	39.4939	-8932.93		39.4915	-15434.3	39.488	-3778.29	39.5014	-6846.37	39.4938	-4066.68	39.4959	-1058.08
39.7934	-15282.9	39.7926	-12643.5	39.8016	-10836.9	39.7885	-12145	39.794	-8916.04		39.7934	-15282.9	39.789	-3728.5	39.802	-6796.51	39.7949	-4025.49	39.7959	-1031.32
40.0948	-15090.2	40.0925	-12684.2	40.1022	-10887.4	40.0894	-12023.5	40.094	-8862.6		40.0948	-15090.2	40.09	-3640.41	40.1025	-6763.35	40.096	-4008.61	40.0959	-1001.35
40.3958	-14943.9	40.3922	-12773.4	40.4025	-10996.4	40.3906	-11907.8	40.394	-8789.95		40.3958	-14943.9	40.3906	-3596.19	40.4027	-6697.01	40.3973	-3971.69	40.396	-968.365
40.6968	-14885.9	40.692	-12769.3	40.7025	-10988.6	40.6921	-11760.1	40.6941	-8733.23		40.6968	-14885.9	40.6912	-3511.86	40.7028	-6566.85	40.6987	-3948.21	40.6962	-939
40.9972	-14850.6	40.9921	-12813.4	41.0027	-11011.1	40.9933	-11686.3	40.9944	-8644.4		40.9972	-14850.6	40.9921	-3465.86	41.0031	-6495.12	40.9999	-3918.73	40.9966	-910.468
41.2967	-14653.7	41.2926	-12831	41.3027	-11080.2	41.2943	-11487.4	41.2949	-8563.75		41.2967	-14653.7	41.2933	-3399.76	41.3031	-6501.9	41.3007	-3893.9	41.2971	-880.686
41.5965	-14522.6	41.5931	-12907.1	41.6024	-11133.3	41.5953	-11390.4	41.5956	-8489.43		41.5965	-14522.6	41.5944	-3356.11	41.6028	-6435.21	41.6016	-3885.12	41.5979	-854.277
41.8962	-14379.8	41.8935	-12909.5	41.902	-11180.5	41.8964	-11276.5	41.8966	-8392.68		41.8962	-14379.8	41.895	-3297.16	41.9024	-6300.99	41.9026	-3833.79	41.8988	-830.621
42.1958	-14205.7	42.1939	-12947.8	42.2013	-11224.3	42.1971	-11161.8	42.1973	-8307		42.1958	-14205.7	42.1954	-3253.98	42.2017	-6193.49	42.2032	-3798.19	42.1993	-803.988
42.4957	-14122.8	42.4944	-12934.6	42.5006	-11200.1	42.4974	-11064.2	42.4977	-8198.9		42.4957	-14122.8	42.4957	-3202.9	42.501	-6123.82	42.5033	-3765.82	42.4997	-779.494
42.7956	-14043.2	42.795	-12907.9	42.8	-11172.5	42.7976	-10968.3	42.7981	-8089.31		42.7956	-14043.2	42.7961	-3131.27	42.8004	-6063.75	42.8033	-3757.39	42.8001	-752.632
43.0957	-14019.8	43.0957	-12885.2	43.0994	-11174.3	43.0978	-10876.5	43.0985	-8000.99		43.0957	-14019.8	43.0964	-3105.34	43.0998	-6026.2	43.1035	-3734.39	43.1005	-728.297
43.3961	-13919	43.3964	-12793.9	43.3989	-11120	43.398	-10762.7	43.3989	-7924.08		43.3961	-13919	43.3969	-3041.87	43.3993	-5937.7	43.4036	-3689.22	43.4008	-705.906
43.6965	-13806.9	43.6971	-12793.3	43.6984	-11159.6	43.698	-10692.7	43.6991	-7848.2		43.6965	-13806.9	43.6974	-3022.78	43.6986	-5896.36	43.7036	-3641.37	43.7009	-682.469
43.9967	-13682.4	43.9972	-12812.9	43.9978	-11119.8	43.9978	-10572.1	43.9988	-7799.52		43.9967	-13682.4	43.9973	-2995.31	43.9978	-5823.81	44.0034	-3614.38	44.0006	-656.523
44.2966	-13537.8	44.2968	-12742.8	44.2973	-11056	44.2976	-10510.8	44.2981	-7724.54		44.2966	-13537.8	44.2967	-2993.52	44.2972	-5753.65	44.3032	-3576.04	44.2998	-630.833
44.5962	-13407	44.5962	-12635.1	44.597	-11008.6	44.5972	-10392.8	44.5972	-7648.03		44.5962	-13407	44.5962	-2966.16	44.5968	-5734.59	44.6028	-3509.71	44.5989	-605.043
44.8958	-13264.5	44.8955	-12560.8	44.897	-10959.4	44.8969	-10289	44.8962	-7567.12		44.8958	-13264.5	44.8956	-2961.76	44.8967	-5757.11	44.9023	-3495.33	44.8979	-573.104
45.1955	-13088.2	45.1945	-12494.1	45.1971	-10873.3	45.1965	-10205	45.1953	-7477.09		45.1955	-13088.2	45.1947	-2973.51	45.1968	-5787.41	45.2018	-3459.62	45.197	-543.676
45.4951	-12917.1	45.4934	-12446.2	45.4975	-10873.1	45.4961	-10080.3	45.4946	-7412.35		45.4951	-12917.1	45.4939	-2973.62	45.4971	-5748.29	45.5011	-3418.88	45.4962	-514.978
45.7946	-12681.5	45.7923	-12416.6	45.7977	-10857.2	45.7954	-9963.37	45.7938	-7347.07		45.7946	-12681.5	45.793	-3001.47	45.7973	-5698.46	45.8003	-3375.88	45.7954	-487.31
46.0944	-12402.1	46.0914	-12322	46.0981	-10781.1	46.0946	-9881.83	46.0929	-7278.59		46.0944	-12402.1	46.0924	-3034.36	46.0977	-5689.25	46.0991	-3316.95	46.0945	-460.936
46.3943	-12148.2	46.3907	-12311.4	46.3984	-10747.8	46.3936	-9753.73	46.3921	-7204.69		46.3943	-12148.2	46.3921	-3096.38	46.398	-5684.23	46.3979	-3271.67	46.3938	-430.967
46.6941	-11939.4	46.6901	-12226.6	46.6985	-10669.9	46.6928	-9622.98	46.6915	-7122.22		46.6941	-11939.4	46.6916	-3120.68	46.6983	-5678.02	46.6968	-3238.81	46.6933	-399.902
46.9939	-11770.3	46.9902	-12094.9	46.9985	-10633.9	46.9923	-9487.55	46.9917	-7008.08		46.9939	-11770.3	46.9918	-3177.8	46.9985	-5777	46.9961	-3178.27	46.9936	-371.268
47.294	-11609.4	47.291	-12066.2	47.2984	-10556.9	47.292	-9362.96	47.2926	-6934.17		47.294	-11609.4	47.2928	-3241.76	47.2986	-5805.87	47.2955	-3127.73	47.2945	-344.809
47.5943	-11484.1	47.5922	-12079.2	47.5982	-10472.4	47.5917	-9265.59	47.5935	-6864.6		47.5943	-11484.1	47.594	-3298.84	47.5986	-5826.82	47.5951	-3083	47.5955	-317.832
47.8948	-11378.9	47.8937	-12028.7	47.8979	-10434.2	47.8915	-9134.99	47.8943	-6798.09		47.8948	-11378.9	47.8955	-3372.68	47.8984	-5826.03	47.8947	-3014.79	47.8964	-295.466
48.1953	-11300	48.1954	-11941	48.1973	-10356.1	48.1913	-8987.33	48.1951	-6747.25		48.1953	-11300	48.1971	-3426.59	48.1979	-5866.97	48.1946	-2953.91	48.1973	-273.005
48.4959	-11249.5	48.4972	-11881.7	48.4966	-10254	48.4915	-8864.12	48.4957	-6679.48		48.4959	-11249.5	48.4986	-3502.02	48.4973	-5903.74	48.4949	-2892.12	48.498	-246.531
48.7966	-11271.9	48.7989	-11811.4	48.7959	-10167.6	48.792	-8717.63	48.7964	-6597.11		48.7966	-11271.9	48.8001	-3605.57	48.7967	-6006.59	48.7955	-2813.88	48.7988	-221.798
49.0969	-11285.6	49.1003	-11828.9	49.0953	-10113.4	49.0927	-8547.32	49.0967	-6552.48		49.0969	-11285.6	49.1012	-3666.13	49.0962	-6028.28	49.0963	-2765.32	49.0992	-194.967
49.3968	-11359	49.4014	-11778	49.3948	-9998.75	49.3933	-8448.11	49.3967	-6496.36		49.3968	-11359	49.402	-3719.16	49.3956	-6077.85	49.3969	-2725.69	49.399	-173.009
49.6969	-11333	49.7022	-11773	49.6944	-9902.73	49.6937	-8378.29	49.6964	-6436.78		49.6969	-11333	49.7027	-3781.13	49.6952	-6114.15	49.6975	-2667.19	49.6987	-148.5
49.9972	-11266	50.0026	-11761.2	49.9943	-9796.13	49.9941	-8273.18	49.9957	-6390.91		49.9972	-11266	50.0028	-3818.55	49.995	-6058.29	49.998	-2613.47	49.9981	-123.341
50.2974	-11291.2	50.3024	-11684.2	50.2943	-9741.06	50.2944	-8179.03	50.2947	-6330.48		50.2974	-11291.2	50.3024	-3849.78	50.2948	-6050.37	50.2985	-2555.29	50.2972	-96.9619
50.5973	-11274.2	50.602	-11603.2	50.5944	-9680.52	50.5946	-8063.79	50.5938	-6271.35		50.5973	-11274.2	50.6019	-3887.83	50.5946	-6056	50.5988	-2516.91	50.5963	-69.8379
50.897	-11233.4	50.9013	-11564.6	50.8945	-9587.94	50.8948	-7985.95	50.8929	-6221.48		50.897	-11233.4	50.9011	-3903.51	50.8945	-6056.6	50.8991	-2457.84	50.8955	-37.8285
51.1967	-11233.1	51.2004	-11512.6	51.1948	-9521.68	51.1949	-7915.92	51.1919	-6158.52		51.1967	-11233.1	51.2002	-3929.05	51.1945	-6018.39	51.1993	-2419.19	51.1946	-7.31704
51.4963	-11162.5	51.4995	-11449.3	51.495	-9439.7	51.4949	-7849.83	51.4907	-6079.03		51.4963	-11162.5	51.4994	-3934.24	51.4946	-5990.75	51.4995	-2367.17	51.4935	25.772
51.7962	-11024.9	51.7988	-11339.7	51.7949	-9341.23	51.7948	-7786.25	51.7895	-6034.37		51.7962	-11024.9	51.7989	-3890.1	51.7944	-5890.12	51.7996	-2340.59	51.7924	63.6369
52.0965	-10913.5	52.0984	-11192.9	52.0947	-9225.55	52.0947	-7751.46	52.0892	-5914.93		52.0965	-10913.5	52.0986	-3886.47	52.0941	-5876.95	52.0998	-2287.49	52.0921	103.258
52.397	-10791.6	52.3982	-11082	52.3945	-9139.4	52.3948	-7667.64	52.3897	-5803.13		52.397	-10791.6	52.3984	-3855.57	52.3938	-5785.89	52.4002	-2226.97	52.3929	151.105
52.6973	-10776.8	52.6983	-10920.3	52.6945	-9025.29	52.6952	-7537.2	52.6902	-5696.29		52.6973	-10776.8	52.6986	-3842.56	52.6936	-5703.83	52.7008	-2159.77	52.6937	199.273
52.9974	-10767.3	52.9988	-10782.6	52.9937	-8958.1	52.9956	-7464.84	52.9908	-5577.32		52.9974	-10767.3	52.9993	-3794.11	52.9928	-5643.32	53.0014	-2108.01	52.9944	254.861
53.2975	-10676.4	53.2996	-10626.8	53.292	-8830.04	53.2962	-7385.71	53.2914	-5463.77		53.2975	-10676.4	53.3001	-3732.48	53.2912	-5572.69	53.3022	-2030.27	53.295	315.961
53.5977	-10591	53.6002	-10452.9	53.5902	-8661.21	53.5969	-7312.03	53.5919	-5317.59		53.5977	-10591	53.6009	-3680.75	53.5895	-5422.96	53.6032	-1952	53.5955	382.233
53.8979	-10493.5	53.9007	-10274.2	53.8885	-8493.99	53.8978	-7222.08	53.8923	-5168.49		53.8979	-10493.5	53.9014	-3637.84	53.8878	-5269.04	53.9042	-1895.89	53.896	452.481
54.1979	-10336.4	54.201	-10111.4	54.1867	-8354.39	54.1987	-7123.23	54.1928	-5019.23		54.1979	-10336.4	54.2019	-3551.6	54.1862	-5083.52	54.205	-1810.86	54.1964	532.968
54.4976	-10248.1	54.5011	-9931.48	54.4851	-8214.13	54.4996	-7018.59	54.4935	-4888.32		54.4976	-10248.1	54.5021	-3489.19	54.4845	-4907.2	54.5055	-1739.71	54.4972	617.445
54.7972	-10234.4	54.8009	-9769.31	54.7839	-8042.29	54.8004	-6955.94	54.7943	-4726.26		54.7972	-10234.4	54.802	-3436.31	54.7832	-4750.53	54.8056	-1638.22	54.7982	711.256
55.0964	-10226.9	55.1007	-9603.26	55.0831	-7891.57	55.1011	-6820.4	55.0946	-4594.72		55.0964	-10226.9	55.1018	-3354.21	55.0824	-4503.92	55.1057	-1542.17	55.0985	814.061
55.3957	-10103.9	55.4003	-9402.59	55.382	-7730.26	55.4016	-6759.44	55.3944	-4467.5		55.3957	-10103.9	55.4013	-3283.71	55.3813	-4357.98	55.4056	-1447.22	55.3982	929.444
55.6951	-9935.89	55.6996	-9233.4	55.6807	-7571.03	55.7019	-6695.5	55.6943	-4335.36		55.6951	-9935.89	55.7006	-3171.53	55.6799	-4177.17	55.7053	-1351.9	55.698	1056.89
55.9944	-9760.46	55.9986	-9077.12	55.9805	-7373.5	56.0019	-6629.86	55.9944	-4224.33		55.9944	-9760.46	55.9995	-3089.13	55.9797	-4001.03	56.0046	-1242.44	55.998	1199.13
56.2938	-9643.13	56.2975	-8975.3	56.2819	-7225.69	56.3016	-6527.27	56.2945	-4098.49		56.2938	-9643.13	56.2982	-3012.31	56.281	-3812.06	56.3037	-1150.67	56.2979	1357.38
56.5936	-9526.36	56.5964	-8864.1	56.5834	-7128.9	56.601	-6460.75	56.5945	-3997.92		56.5936	-9526.36	56.597	-2920.54	56.5825	-3675.56	56.6024	-1032.45	56.5978	1534.4
56.8936	-9430.7	56.8957	-8735.47	56.8849	-7017.46	56.9003	-6362.44	56.895	-3876.58		56.8936	-9430.7	56.896	-2797.41	56.884	-3557.15	56.9008	-895.554	56.8981	1729.53
57.1939	-9357.04	57.1954	-8630.7	57.1866	-6900.2	57.1992	-6243.64	57.1958	-3757.21		57.1939	-9357.04	57.1955	-2719.54	57.1855	-3439.3	57.1995	-740.82	57.1987	1958.13
57.4944	-9229.64	57.4953	-8487.13	57.4883	-6785.77	57.498	-6147.12	57.4964	-3629.97		57.4944	-9229.64	57.4952	-2603.36	57.4872	-3331.81	57.4984	-583.753	57.4991	2220.57
57.795	-9040.03	57.7953	-8403.36	57.7899	-6694.36	57.7969	-5993.7	57.797	-3503.47		57.795	-9040.03	57.795	-2455.16	57.7888	-3258.46	57.7974	-400.557	57.7993	2508.01
58.0957	-8846.05	58.0951	-8340.31	58.0913	-6603.51	58.0958	-5933.66	58.0979	-3379.93		58.0957	-8846.05	58.0948	-2297.72	58.0902	-3196.81	58.0966	-216.143	58.0999	2835.28
58.3962	-8770.29	58.395	-8292.61	58.3929	-6516.13	58.3947	-5778.69	58.3987	-3242.07		58.3962	-8770.29	58.3947	-2139.99	58.3917	-3077.69	58.3957	15.6745	58.4005	3197.87
58.6968	-8637.54	58.6945	-8240.25	58.6946	-6459.46	58.6937	-5625.81	58.6993	-3089.62		58.6968	-8637.54	58.6944	-2020.47	58.6934	-2972.46	58.6949	266.008	58.7011	3610.94
58.9977	-8554.85	58.9939	-8151.54	58.9958	-6375.31	58.9929	-5457.07	58.9999	-2906.79		58.9977	-8554.85	58.994	-1875.53	58.9945	-2843.09	58.9944	565.354	59.0015	4070.57
59.2986	-8431.45	59.2933	-8043.27	59.2962	-6282.68	59.2922	-5309.97	59.3004	-2716.95		59.2986	-8431.45	59.2938	-1690.52	59.2949	-2679.24	59.2942	905.147	59.302	4580.32
59.5991	-8251.4	59.5929	-7948.46	59.5966	-6140.27	59.5917	-5102.96	59.6011	-2497.63		59.5991	-8251.4	59.5936	-1491.55	59.5952	-2531.37	59.5943	1286.85	59.6026	5161.28
59.8996	-8062.86	59.8923	-7847.12	59.897	-6030.21	59.8914	-4915.41	59.9014	-2274.39		59.8996	-8062.86	59.8932	-1262.72	59.8955	-2335.63	59.8946	1719.02	59.9029	5814.82
60.1998	-7875.02	60.1915	-7753.85	60.1972	-5881.51	60.1915	-4743.05	60.2015	-2001.83		60.1998	-7875.02	60.1925	-1002.31	60.1957	-2140.88	60.1952	2189.05	60.2029	6528.04
60.5	-7717.38	60.4905	-7655.41	60.4971	-5715.38	60.492	-4522.16	60.5016	-1678.77		60.5	-7717.38	60.4917	-718.274	60.4958	-1872.93	60.496	2742.64	60.503	7312.16
60.8002	-7604.21	60.7895	-7523.63	60.797	-5519.7	60.7925	-4310.39	60.8017	-1315.63		60.8002	-7604.21	60.7908	-433.492	60.7958	-1521.56	60.7968	3323.29	60.8032	8191.02
61.1004	-7423.53	61.0888	-7327.33	61.0967	-5290.18	61.0928	-4017.49	61.1017	-886.444		61.1004	-7423.53	61.0901	-119.132	61.0957	-1170.34	61.0975	4004.11	61.1033	9155.2
61.4008	-7193.19	61.3883	-7119.28	61.3964	-5036.98	61.3933	-3727.56	61.4017	-397.244		61.4008	-7193.19	61.3894	232.256	61.3956	-770.578	61.3984	4738.54	61.4033	10206
61.701	-7004.48	61.6882	-6887.81	61.6962	-4700.41	61.6939	-3423.42	61.7016	142.386		61.701	-7004.48	61.6892	671.758	61.6956	-321.574	61.6991	5553.27	61.7032	11349.5
62.0009	-6747.44	61.9888	-6619.41	61.9961	-4351.08	61.9943	-3084.26	62.0015	731.474		62.0009	-6747.44	61.9896	1133.41	61.9956	169.818	61.9996	6435.6	62.0031	12592
62.3007	-6422.09	62.2894	-6347.48	62.296	-3923.79	62.2946	-2687.18	62.3013	1411.97		62.3007	-6422.09	62.29	1614.89	62.2957	654.863	62.2999	7382.4	62.3029	13943.6
62.6004	-6115.02	62.5901	-6038.06	62.5958	-3485.64	62.5948	-2280.02	62.601	2163.16		62.6004	-6115.02	62.5906	2149.23	62.5956	1249.4	62.6001	8447.07	62.6025	15382.4
62.9002	-5801.58	62.8909	-5706.19	62.8953	-2975.23	62.8949	-1822.14	62.9004	2990.32		62.9002	-5801.58	62.8913	2680.05	62.8953	1821.16	62.9002	9593.03	62.902	16919.7
63.2001	-5420.6	63.1915	-5316.52	63.1949	-2428.74	63.1948	-1317.53	63.1999	3865		63.2001	-5420.6	63.192	3296.3	63.1948	2506.12	63.1999	10819.3	63.2016	18532.8
63.5	-4960.71	63.4923	-4956.41	63.4944	-1807.28	63.4943	-778.416	63.4995	4798.44		63.5	-4960.71	63.4926	3929.12	63.4943	3213.41	63.4993	12119.7	63.5011	20246.9
63.7999	-4403.16	63.7929	-4514.99	63.794	-1165.65	63.7938	-204.777	63.799	5816.5		63.7999	-4403.16	63.7932	4611.98	63.7938	3955.05	63.7987	13544.5	63.8006	22029.3
64.0999	-3816.04	64.0934	-4096.4	64.0939	-441.371	64.0934	422.94	64.0985	6874.78		64.0999	-3816.04	64.0936	5326.7	64.0935	4785.15	64.098	15064.1	64.1	23866.3
64.3997	-3198.74	64.3939	-3656.86	64.3938	338.213	64.3928	1116.92	64.398	7992.27		64.3997	-3198.74	64.394	6061.08	64.3933	5642.36	64.3973	16674.3	64.3995	25767.2
64.6995	-2569.94	64.6945	-3157.97	64.6937	1157.66	64.6924	1863.62	64.6976	9187.22		64.6995	-2569.94	64.6944	6786.86	64.6931	6519.43	64.6968	18375.2	64.6989	27672.4
64.9996	-1869.61	64.9947	-2703.83	64.9935	2013.01	64.9923	2690.54	64.9972	10449.2		64.9996	-1869.61	64.9945	7580.79	64.9929	7473.69	64.9966	20135.5	64.9984	29584.2
65.2999	-1193.9	65.2948	-2192.64	65.2931	2877.44	65.2924	3517.46	65.297	11738.4		65.2999	-1193.9	65.2945	8399.05	65.2925	8509.17	65.2966	22024.3	65.2981	31475.1
65.6002	-531.603	65.5948	-1636.53	65.5929	3809.58	65.5923	4433.87	65.5971	13086.5		65.6002	-531.603	65.5943	9214.48	65.5923	9546.57	65.5966	23926.9	65.5982	33365.9
65.9005	266.042	65.8947	-1079.48	65.8931	4797.33	65.8922	5383.83	65.8975	14476.5		65.9005	266.042	65.894	10035	65.8925	10695.5	65.8965	25818.5	65.8985	35178.4
66.2007	1033.95	66.1947	-507.193	66.193	5857.61	66.1924	6388.8	66.1979	15920.9		66.2007	1033.95	66.194	10800.3	66.1925	11840.8	66.1967	27752.6	66.1988	36940
66.5008	1794.13	66.4949	113.293	66.4927	6890.25	66.4928	7426.53	66.4982	17394.6		66.5008	1794.13	66.4942	11573.3	66.4923	12953.6	66.497	29690	66.4991	38570.1
66.8009	2586.95	66.7953	706.973	66.7925	8002.82	66.7933	8527.89	66.7984	18851.8		66.8009	2586.95	66.7946	12267.3	66.7922	14086.8	66.7975	31594.7	66.7992	40062.7
67.101	3274.66	67.0958	1348.63	67.0921	9103.34	67.0938	9629.5	67.0984	20277.6		67.101	3274.66	67.0952	12924.7	67.0919	15205	67.098	33410.7	67.0992	41329.6
67.4011	4004	67.3961	1991.31	67.3916	10201.5	67.3943	10669.5	67.3984	21677.7		67.4011	4004	67.3956	13522.6	67.3915	16256.9	67.3985	35136.2	67.3992	42370
67.7012	4754.74	67.6961	2563.4	67.6911	11246.9	67.6946	11714.2	67.6986	22985.4		67.7012	4754.74	67.6957	14066.5	67.6911	17321.7	67.6988	36664.8	67.6994	43175.3
68.001	5451.55	67.9961	3160.87	67.9907	12320.6	67.9946	12717.3	67.9987	24215.1		68.001	5451.55	67.9959	14468.7	67.9908	18229.5	67.9989	38058.9	67.9996	43683.4
68.3008	6094.11	68.296	3688.07	68.2904	13315.9	68.2945	13683	68.2985	25307.9		68.3008	6094.11	68.2961	14710.9	68.2905	19012.6	68.2989	39163.4	68.2994	43803.5
68.6005	6745.22	68.596	4108.91	68.5903	14188.6	68.5947	14485.3	68.598	26184.2		68.6005	6745.22	68.5963	14788.7	68.5904	19671.6	68.599	39951	68.5988	43482.4
68.9003	7166.23	68.896	4459.48	68.89	14948	68.8949	15187.8	68.8972	26827.4		68.9003	7166.23	68.8966	14737.1	68.8901	20109.4	68.8992	40501.4	68.8979	42739.7
69.2001	7539.21	69.196	4709.15	69.1903	15471.4	69.1949	15682.8	69.1959	27201.4		69.2001	7539.21	69.1967	14514.2	69.1903	20247.5	69.1994	40641.4	69.1966	41545.7
69.4998	7736.6	69.4957	4773.79	69.4909	15836.7	69.4948	16000.2	69.4944	27183.1		69.4998	7736.6	69.4968	14011	69.4909	20225.8	69.4993	40287.7	69.4949	39844
69.7995	7720.24	69.7953	4678.62	69.7914	15923.7	69.7945	16015.6	69.7926	26864.1		69.7995	7720.24	69.7966	13370	69.7914	19868.9	69.7992	39343.6	69.7931	37710.3
70.0991	7644.35	70.095	4346.91	70.092	15697.5	70.0943	15749.2	70.0909	26185.4		70.0991	7644.35	70.0964	12501.4	70.0919	19167.5	70.0991	37913.2	70.0912	35128.9
70.3986	7240.84	70.3947	3823.79	70.3927	15210.6	70.3943	15267.4	70.3891	25116.3		70.3986	7240.84	70.3964	11425.4	70.3925	18258.2	70.3992	35985.6	70.3894	32150
70.6981	6698.79	70.6947	3125.48	70.6933	14500.2	70.6944	14451.3	70.6873	23664.5		70.6981	6698.79	70.6965	10093.5	70.6931	17000.3	70.6994	33627.5	70.6875	28850.3
70.9979	5927.79	70.9948	2240.65	70.9937	13411.3	70.9946	13326.9	70.9855	21818.8		70.9979	5927.79	70.9967	8574.01	70.9935	15551	70.9996	30781.7	70.9858	25306.5
71.2976	5022.2	71.2949	1206.71	71.2939	12122.5	71.2948	11928.9	71.2841	19690.4		71.2976	5022.2	71.2969	6996.48	71.2937	13892	71.2999	27572.7	71.2842	21664.9
71.5972	3941.27	71.595	44.5278	71.594	10650.4	71.595	10341.7	71.5827	17357.2		71.5972	3941.27	71.5971	5397.48	71.594	12041.7	71.6001	24129	71.5829	17974.6
71.8968	2832.95	71.8952	-1208.82	71.8943	9002.25	71.8952	8529.45	71.8817	14900.6		71.8968	2832.95	71.8973	3743.26	71.8945	10137.6	71.9003	20511.2	71.882	14343
72.1965	1604.35	72.1955	-2503.4	72.1945	7292.2	72.1955	6675.75	72.1816	12379.5		72.1965	1604.35	72.1976	2077.94	72.1949	8305.38	72.2005	16793.6	72.182	10879.7
72.4964	427.575	72.4959	-3718.41	72.4946	5568.32	72.4959	4746.05	72.4821	9952.17		72.4964	427.575	72.4979	600.765	72.4952	6457.26	72.5009	13288.6	72.4827	7661.55
72.7963	-758.959	72.7962	-4870.97	72.7949	3866.49	72.7964	2905.51	72.7833	7603.93		72.7963	-758.959	72.7981	-800.696	72.7956	4811.54	72.8013	10173	72.784	4723.84
73.0963	-1921.33	73.0961	-5866.61	73.0951	2391.89	73.0963	1106.33	73.085	5451.87		73.0963	-1921.33	73.098	-2031.36	73.0959	3412.31	73.1011	7245.33	73.0859	2196.45
73.3963	-2797.84	73.396	-6665.94	73.395	1071.07	73.3954	-549.014	73.3865	3542.76		73.3963	-2797.84	73.3977	-2994.05	73.396	2152.88	73.4001	4646.22	73.3875	74.5142
73.6961	-3572.31	73.6956	-7297.47	73.695	-95.6431	73.6944	-1977.94	73.6878	1997.7		73.6961	-3572.31	73.6973	-3649.93	73.6962	1134.22	73.6991	2537.96	73.6888	-1674.36
73.9959	-4133.44	73.9952	-7713.61	73.9953	-968.385	73.9934	-3167.17	73.989	833.658		73.9959	-4133.44	73.9968	-4027.7	73.9965	368.577	73.998	953.514	73.99	-2992.14
74.2958	-4492.27	74.2948	-7924.07	74.2956	-1591.8	74.2924	-4125.18	74.2902	5.00574		74.2958	-4492.27	74.2964	-4254.14	74.2969	-81.5591	74.297	-196.252	74.2912	-3928.21
74.596	-4645.01	74.5944	-7885.01	74.5956	-1949.75	74.5914	-4850.75	74.5912	-493.912		74.596	-4645.01	74.5958	-4323.96	74.597	-266.352	74.596	-887.13	74.5922	-4465.48
74.8962	-4643.01	74.8939	-7661.16	74.8955	-2072.79	74.8904	-5327.19	74.892	-680.452		74.8962	-4643.01	74.8951	-4163.52	74.8969	-165.291	74.8948	-1233.33	74.8929	-4658.12
75.1963	-4454.33	75.1932	-7289.57	75.1952	-1911.47	75.1892	-5649.87	75.1924	-559.382		75.1963	-4454.33	75.1942	-3780.32	75.1965	82.4029	75.1935	-1120.5	75.1932	-4553.11
75.4961	-4074.51	75.4925	-6794.74	75.4947	-1534.67	75.488	-5799.58	75.4927	-149.935		75.4961	-4074.51	75.4934	-3265.96	75.496	583.826	75.4922	-830.636	75.4933	-4164.67
75.796	-3470.36	75.7921	-6179.43	75.7942	-921.08	75.7867	-5823.51	75.7925	497.462		75.796	-3470.36	75.7929	-2596.5	75.7956	1231.07	75.7908	-526.963	75.793	-3526.75
76.0959	-2661.97	76.092	-5442.47	76.094	-233.435	76.0866	-5571.47	76.0919	1398.5		76.0959	-2661.97	76.0926	-1831.82	76.0953	1990.97	76.0905	113.313	76.0923	-2681.28
76.3959	-1782.99	76.392	-4667.57	76.3936	589.387	76.3875	-5317.35	76.3914	2466.26		76.3959	-1782.99	76.3926	-1065.5	76.3948	2941.97	76.3914	860.468	76.3918	-1698.17
76.6959	-837.865	76.6921	-3761.79	76.6929	1611.74	76.6882	-4958.68	76.691	3659.47		76.6959	-837.865	76.6926	-294.382	76.694	4050.57	76.6921	1693.78	76.6914	-533.274
76.996	162.896	76.9923	-2807.38	76.992	2803.67	76.9889	-4540.97	76.9906	4927.02		76.996	162.896	76.9927	454.498	76.993	5155.91	76.9928	2376.64	76.9911	620.358
77.2961	1079.64	77.2925	-1835.02	77.2913	4127.22	77.2894	-4063.53	77.2902	6204.01		77.2961	1079.64	77.2928	1290.55	77.2922	6170.99	77.2933	2984.43	77.2908	1709.17
77.596	2041.5	77.5928	-894.159	77.5907	5455.48	77.5897	-3576.17	77.5901	7520.3		77.596	2041.5	77.5931	2144.43	77.5914	7204.06	77.5937	3569.28	77.5908	2764.43
77.8959	3069.19	77.8932	80.7506	77.8902	6808.91	77.8901	-2991.14	77.8901	8887.36		77.8959	3069.19	77.8935	2910.81	77.8908	8115.61	77.8942	4099.45	77.891	3803.18
78.196	4074.53	78.1936	1112.76	78.1899	8090.82	78.1905	-2365.92	78.1902	10143.6		78.196	4074.53	78.1939	3633.36	78.1902	8972.3	78.1946	4447.32	78.191	4671.97
78.4962	4890.94	78.4939	2109.91	78.4897	9215.77	78.4907	-1735.9	78.4901	11183.7		78.4962	4890.94	78.4942	4195.27	78.4897	9619.65	78.4949	4667.56	78.4911	5379.41
78.7964	5601.66	78.794	3015.16	78.7892	10136.1	78.7906	-1106.74	78.7902	11922.4		78.7964	5601.66	78.7942	4561.02	78.7889	10010	78.7949	4840.35	78.7911	5787.29
79.0964	6009.49	79.0941	3763.8	79.0883	10816	79.0899	-667.954	79.0905	12310		79.0964	6009.49	79.0942	4789.65	79.0878	10089.3	79.0941	4649.46	79.0914	5919.71
79.3964	6129.67	79.3941	4384.03	79.388	11154.7	79.3887	-274.82	79.3911	12347.5		79.3964	6129.67	79.3942	4838.84	79.3873	9840.4	79.3929	4280.55	79.3919	5730.36
79.6965	6056.02	79.694	4739.81	79.6885	11087.2	79.6879	-55.3325	79.6918	11953.5		79.6965	6056.02	79.694	4757.35	79.6876	9177.79	79.6919	3483.2	79.6924	5175.52
79.9963	5684.99	79.9938	4877.79	79.9892	10512	79.9872	-40.6093	79.9928	11195		79.9963	5684.99	79.9938	4530.27	79.9881	8350.02	79.991	2684.77	79.9931	4421.82
80.296	5287.22	80.2933	4813.35	80.2899	9418.27	80.2868	-184.272	80.2939	10147.9		80.296	5287.22	80.2934	4078.49	80.2886	7345.41	80.2903	1862.66	80.2939	3573.91
80.5957	4573.26	80.5927	4575.29	80.5905	8030.82	80.5868	-435.278	80.5948	8722.07		80.5957	4573.26	80.5928	3480.46	80.589	6009.98	80.59	680.763	80.5945	2482.41
80.8954	3533.51	80.892	4094.91	80.8912	6313.11	80.8868	-949.599	80.8956	6804.25		80.8954	3533.51	80.892	2742.93	80.8895	4469.32	80.8897	-721.016	80.8949	1066.81
81.195	2309.43	81.1913	3363.01	81.1916	4284.55	81.187	-1681.2	81.1963	4640.69		81.195	2309.43	81.1914	1859.71	81.19	2766.19	81.1896	-2201.82	81.1954	-453.121
81.4946	1077.29	81.4909	2450.17	81.4918	2129.56	81.4873	-2550.44	81.497	2401.01		81.4946	1077.29	81.4911	976.416	81.4903	1037.94	81.4898	-3749.51	81.4958	-2039.75
81.7944	-342.865	81.7908	1514.08	81.7925	-13.3939	81.788	-3506.52	81.7976	278.404		81.7944	-342.865	81.791	167.598	81.791	-655.999	81.7906	-5209.01	81.7963	-3524.17
82.0944	-1658.34	82.0907	550.634	82.0938	-2088.85	82.0891	-4446.9	82.0982	-1741.05		82.0944	-1658.34	82.0911	-614.9	82.0923	-2185.15	82.0918	-6484.16	82.0966	-4920.56
82.3946	-2796.09	82.3908	-443.992	82.3948	-3966.79	82.3902	-5360.83	82.3986	-3560.71		82.3946	-2796.09	82.3912	-1272.15	82.3932	-3567.7	82.3929	-7567.99	82.3968	-6114.87
82.6948	-3863.1	82.6909	-1299.6	82.6952	-5684.86	82.6912	-6151.9	82.6989	-5145.34		82.6948	-3863.1	82.6913	-1904.75	82.6937	-4687.01	82.6941	-8326.17	82.6969	-7136.41
82.9952	-4680.78	82.9911	-2096.42	82.9955	-7078.94	82.9919	-6806.83	82.9991	-6512.99		82.9952	-4680.78	82.9915	-2416.94	82.9941	-5707.71	82.9951	-9114.37	82.9969	-8035.25
83.2958	-5487.69	83.2916	-2713.84	83.2958	-8141.78	83.2923	-7313.45	83.2991	-7641.4		83.2958	-5487.69	83.292	-2812.51	83.2944	-6567.52	83.2958	-9752.86	83.2969	-8866.39
83.5965	-6076.39	83.5923	-3269.01	83.5959	-9017.39	83.5924	-7726.45	83.5992	-8490.76		83.5965	-6076.39	83.5927	-3116.98	83.5946	-7073.25	83.5963	-10082.5	83.5969	-9497.77
83.897	-6477.35	83.893	-3688.75	83.8959	-9685.58	83.8925	-7982.42	83.8993	-9026.51		83.897	-6477.35	83.8936	-3317.39	83.8946	-7484.35	83.8967	-10230.7	83.8971	-9877.79
84.1974	-6750.6	84.1937	-3960.58	84.1959	-10074.4	84.1925	-8064.82	84.1993	-9315.85		84.1974	-6750.6	84.1943	-3401.75	84.1947	-7686.27	84.197	-10245.8	84.1971	-10140.4
84.4977	-6953.99	84.494	-4092.02	84.4962	-10291	84.4926	-7988.13	84.4992	-9463.65		84.4977	-6953.99	84.4947	-3452.43	84.4951	-7794.64	84.4973	-10110.8	84.4971	-10258.9
84.7979	-6949.19	84.7941	-4210.66	84.7963	-10453	84.7925	-7885.36	84.7988	-9600.59		84.7979	-6949.19	84.7949	-3425.2	84.7952	-7789.83	84.7972	-9932.04	84.7968	-10394.8
85.098	-6869.7	85.0941	-4267.17	85.096	-10558.3	85.0921	-7731.46	85.0981	-9647.11		85.098	-6869.7	85.0951	-3378.79	85.0951	-7825.08	85.097	-9714.22	85.0964	-10462.6
85.3979	-6858.28	85.3941	-4203.09	85.3958	-10624.5	85.3918	-7509.23	85.3975	-9664.67		85.3979	-6858.28	85.3953	-3372.98	85.395	-7824.76	85.3967	-9604.14	85.396	-10526.9
85.6977	-6775.72	85.694	-4189.53	85.6957	-10602.5	85.6915	-7325.88	85.6967	-9621.22		85.6977	-6775.72	85.6954	-3333.71	85.695	-7795.65	85.6964	-9554.25	85.6955	-10497
85.9974	-6764.54	85.9939	-4106.42	85.9956	-10605.5	85.9914	-7134.1	85.9959	-9547.28		85.9974	-6764.54	85.9955	-3318.05	85.9951	-7754.1	85.9962	-9370.77	85.995	-10488.9
86.297	-6716.76	86.2938	-4099.23	86.2955	-10617.1	86.2915	-6982.33	86.2951	-9512.84		86.297	-6716.76	86.2957	-3259.85	86.2951	-7731.02	86.2961	-9237.52	86.2944	-10399.5
86.5967	-6683.96	86.5938	-4010.5	86.5955	-10607.4	86.5917	-6808.75	86.5942	-9475.75		86.5967	-6683.96	86.5958	-3226.06	86.5952	-7842.23	86.5962	-9071.35	86.5937	-10348.3
86.8965	-6621.43	86.8937	-3924.74	86.8957	-10501.7	86.8919	-6689.28	86.8933	-9388.75		86.8965	-6621.43	86.8959	-3122.73	86.8953	-7821.29	86.8962	-8875.93	86.8929	-10306
87.1967	-6525.35	87.1938	-3885.4	87.1958	-10434.1	87.1919	-6537.48	87.1921	-9356.44		87.1967	-6525.35	87.196	-3052.18	87.1954	-7872.36	87.1962	-8710.15	87.192	-10260.2
87.497	-6460.88	87.494	-3861.02	87.4957	-10376.9	87.492	-6414.99	87.4912	-9279.94		87.497	-6460.88	87.4962	-2962.4	87.4953	-7911.2	87.4962	-8504.79	87.4911	-10234.7
87.7971	-6428.47	87.7942	-3783.23	87.7954	-10310.1	87.7921	-6255.85	87.7907	-9151.7		87.7971	-6428.47	87.7964	-2995.39	87.795	-7957.87	87.7963	-8438.92	87.7906	-10089.1
88.0971	-6416.61	88.0945	-3707.98	88.095	-10178	88.0923	-6104.1	88.0903	-9043.75		88.0971	-6416.61	88.0966	-2995.38	88.0946	-7963.21	88.0964	-8330.1	88.0904	-9993.53
88.397	-6386.94	88.3948	-3690.45	88.3944	-10073.1	88.3924	-5945.43	88.39	-8957.77		88.397	-6386.94	88.3968	-2948.11	88.3938	-7991.89	88.3966	-8092.64	88.39	-9888.73
88.697	-6380.57	88.6951	-3617.25	88.6936	-9991.99	88.6924	-5784.14	88.6896	-8912.44		88.697	-6380.57	88.6971	-2880.04	88.6929	-8003.12	88.6968	-7870.54	88.6896	-9918.09
88.9971	-6341.99	88.9955	-3586.83	88.9925	-9868.01	88.9924	-5629.12	88.9891	-8872.05		88.9971	-6341.99	88.9975	-2820.02	88.9918	-8001.62	88.997	-7650.81	88.9892	-9821.3
89.297	-6323.32	89.2957	-3517.4	89.2915	-9747.03	89.2926	-5451.32	89.2888	-8777.57		89.297	-6323.32	89.2977	-2805.8	89.2908	-7993.75	89.2972	-7557.79	89.2889	-9767.07
89.5967	-6287.23	89.5958	-3517.52	89.5906	-9600.44	89.5927	-5327.14	89.5885	-8721.58		89.5967	-6287.23	89.5978	-2782.36	89.5899	-7942.05	89.5975	-7529.36	89.5887	-9683.98
89.8962	-6258.58	89.8961	-3496.58	89.8898	-9518.26	89.8931	-5123.85	89.8883	-8693.3		89.8962	-6258.58	89.8981	-2806.55	89.8891	-7939.7	89.8979	-7519.78	89.8886	-9602.93
90.1956	-6263.14	90.1963	-3445.77	90.189	-9405.14	90.1933	-5008.93	90.1886	-8606.19		90.1956	-6263.14	90.1984	-2819.89	90.1885	-7912.48	90.1982	-7454.86	90.189	-9484.53
90.4949	-6227.71	90.4965	-3369.15	90.4887	-9268.93	90.4933	-4902.46	90.4888	-8574.78		90.4949	-6227.71	90.4988	-2846.2	90.4882	-7884.11	90.4982	-7463.19	90.4893	-9372.44
90.7942	-6216.51	90.7969	-3338.15	90.7886	-9114.91	90.7931	-4789.11	90.7885	-8573.86		90.7942	-6216.51	90.7992	-2785.06	90.7881	-7858.78	90.7981	-7319.31	90.789	-9310.39
91.0936	-6231.24	91.0971	-3301.78	91.0888	-8982.39	91.0929	-4681.22	91.0881	-8540.29		91.0936	-6231.24	91.0995	-2737.65	91.0884	-7760.65	91.0978	-7276.48	91.0886	-9189.47
91.3931	-6161.23	91.3972	-3261.97	91.3894	-8814.63	91.3927	-4622.07	91.3879	-8493.47		91.3931	-6161.23	91.3996	-2712.14	91.3891	-7657.98	91.3975	-7314.78	91.3884	-9102.32
91.6928	-6126.76	91.6971	-3235.47	91.6901	-8657.71	91.6925	-4577.3	91.6877	-8411.87		91.6928	-6126.76	91.6996	-2725.98	91.69	-7584.74	91.697	-7352.99	91.6882	-8892.06
91.9922	-6125.69	91.997	-3189.82	91.9912	-8511.79	91.9921	-4503.48	91.9876	-8361.89		91.9922	-6125.69	91.9994	-2707.15	91.991	-7514.5	91.9965	-7456.6	91.9882	-8782.64
92.2918	-6093.99	92.297	-3186.32	92.2924	-8343.52	92.2915	-4468.97	92.2877	-8322.98		92.2918	-6093.99	92.2993	-2742.81	92.2922	-7442.61	92.2957	-7397.45	92.2882	-8678.17
92.5916	-6100.13	92.5968	-3135.7	92.5935	-8168.29	92.5907	-4411.76	92.5879	-8265.52		92.5916	-6100.13	92.599	-2752.23	92.5933	-7351.21	92.5948	-7332.79	92.5883	-8551.28
92.8914	-6105.95	92.8964	-3090.14	92.8944	-8006.18	92.8899	-4396.51	92.8882	-8212.44		92.8914	-6105.95	92.8985	-2771.11	92.8942	-7289.21	92.8939	-7216.25	92.8884	-8403.5
93.1912	-6099.09	93.1958	-3066.99	93.1952	-7838.56	93.1896	-4318.15	93.1883	-8167.13		93.1912	-6099.09	93.1978	-2785.99	93.1949	-7220.91	93.1934	-7161.38	93.1882	-8298.09
93.4909	-6144.16	93.4949	-3076.27	93.4958	-7679.82	93.4896	-4274.4	93.4888	-8085.73		93.4909	-6144.16	93.4968	-2768.47	93.4954	-7183.45	93.4933	-7071.29	93.4886	-8151.77
93.7908	-6154.14	93.794	-3058.79	93.7961	-7497.07	93.7897	-4250.89	93.79	-7965.91		93.7908	-6154.14	93.7958	-2784.17	93.7957	-7130.57	93.7933	-7027.04	93.7897	-8032.56
94.091	-6177.62	94.0932	-3035.18	94.0962	-7353.76	94.0899	-4198.01	94.0913	-7912.01		94.091	-6177.62	94.0949	-2824.77	94.0958	-7139.4	94.0934	-6976.09	94.0909	-7927.25
94.3912	-6239.83	94.3925	-3015.26	94.3961	-7197.91	94.39	-4125.64	94.3927	-7850.95		94.3912	-6239.83	94.3941	-2870.47	94.3956	-7111.22	94.3937	-6940.93	94.3921	-7812.51
94.6911	-6284.24	94.6921	-3017.87	94.696	-7030.14	94.6902	-4037.01	94.694	-7824.97		94.6911	-6284.24	94.6935	-2904.72	94.6954	-7193.24	94.694	-6835	94.6931	-7771.16
94.9913	-6299.44	94.9917	-3029.71	94.9955	-6877.39	94.9905	-3993.95	94.9952	-7760.59		94.9913	-6299.44	94.9929	-2949.19	94.995	-7230.21	94.9944	-6714.02	94.9941	-7679.31
95.2917	-6348.35	95.2913	-2994.76	95.2949	-6707.82	95.291	-3935.28	95.2962	-7729.53		95.2917	-6348.35	95.2924	-2911.44	95.2947	-7268.69	95.2949	-6607.35	95.295	-7564.97
95.592	-6370.92	95.5913	-2997.47	95.5945	-6562.26	95.5914	-3887.36	95.5969	-7661.74		95.592	-6370.92	95.5922	-2877.3	95.5943	-7319.25	95.5953	-6532.8	95.5958	-7484.08
95.8924	-6406.69	95.8915	-3033.06	95.894	-6408.8	95.8916	-3837.54	95.8976	-7580.04		95.8924	-6406.69	95.8922	-2827.58	95.894	-7357.08	95.8955	-6505.09	95.8966	-7438.38
96.1924	-6407.04	96.1916	-3010.62	96.1932	-6257.92	96.1911	-3812.95	96.1979	-7522.41		96.1924	-6407.04	96.1921	-2809.32	96.1934	-7337.81	96.195	-6391.66	96.1971	-7337.44

## Sheet: Figure 6B
Figure 6B: Stability evaluation of formulated MS-Hu6 at 4°C and 25°C for 90 days by Size Exclusion Chromatography
4°C						25°C
Elution Volume (mL)	A280 (mAU)					Elution Volume (mL)	A280 (mAU)
	Day 0	Batch 1	Batch 2	Batch 3			Day 0	Batch 1	Batch 2	Batch 3
0	37.4092	0.0065709	17.7987	13.121		0	37.4092	-0.0128847	8.37151	40.3589
0.001	133.187	0.353661	54.0832	96.1317		0.001	133.187	-0.183613	85.914	140.876
0.001	133.956	0.552454	56.1855	117.009		0.001	133.956	-0.276947	108.559	143.193
0.002	126.249	0.552116	54.6865	111.065		0.002	126.249	-0.275354	99.9665	131.121
0.003	117.351	0.553523	53.9617	105.777		0.003	117.351	-0.272626	93.2526	121.863
0.003	109.807	0.554331	52.9926	97.8487		0.003	109.807	-0.271724	88.2649	114.139
0.004	104.634	0.555669	52.3676	92.9419		0.004	104.634	-0.272103	86.4225	108.878
0.005	98.6108	0.557683	51.5947	90.5523		0.005	98.6108	-0.271616	84.8251	104.367
0.005	92.3292	0.559329	49.4364	86.9916		0.005	92.3292	-0.271295	82.6555	97.2044
0.006	86.1291	0.560812	47.4931	81.2837		0.006	86.1291	-0.269951	77.1409	91.5416
0.007	78.8326	0.562972	46.4167	75.7802		0.007	78.8326	-0.268225	70.7785	87.1657
0.007	74.6526	0.56466	45.7211	72.7748		0.007	74.6526	-0.265795	64.9727	80.4852
0.008	69.8193	0.566138	45.2428	69.4505		0.008	69.8193	-0.264101	57.5854	73.9681
0.009	64.2436	0.568735	43.8712	64.0637		0.009	64.2436	-0.261668	52.0559	72.7241
0.009	60.2711	0.570671	42.6668	59.0254		0.009	60.2711	-0.260465	48.7052	67.0398
0.01	54.4259	0.571946	42.1533	53.7804		0.01	54.4259	-0.257697	45.694	60.5543
0.011	50.046	0.572994	41.2433	51.7871		0.011	50.046	-0.253653	42.3491	54.1506
0.011	44.8415	0.573234	41.0011	49.0426		0.011	44.8415	-0.250643	37.6821	47.3249
0.012	37.6062	0.57373	40.0911	45.0521		0.012	37.6062	-0.248423	33.1869	40.5606
0.013	31.6851	0.575191	39.5577	39.6596		0.013	31.6851	-0.246054	29.1491	33.5674
0.013	25.5936	0.576697	37.3768	35.0763		0.013	25.5936	-0.244346	24.8204	30.2431
0.014	19.8568	0.577271	36.5186	32.2971		0.014	19.8568	-0.242102	21.6733	23.953
0.015	17.5008	0.577669	36.1874	28.8834		0.015	17.5008	-0.239901	20.0141	20.2349
0.015	11.9774	0.577815	34.9262	23.7569		0.015	11.9774	-0.238516	17.7747	16.114
0.016	7.19397	0.577179	34.6361	17.2797		0.016	7.19397	-0.237466	16.334	11.6888
0.017	3.87915	0.576589	34.4835	11.2343		0.017	3.87915	-0.237249	15.7033	9.14697
0.017	3.41907	0.57653	34.2677	7.97739		0.017	3.41907	-0.236615	11.6549	8.4807
0.018	3.41907	0.576258	33.9918	7.93019		0.018	3.41907	-0.235723	8.87576	8.19322
0.019	3.41809	0.575616	20.778	7.93044		0.019	3.41809	-0.234974	8.629	7.95314
0.019	3.4168	0.575502	7.01761	7.93242		0.019	3.4168	-0.240771	8.63045	7.95389
0.02	3.42142	0.575665	-1.13314	7.90815		0.02	3.42142	-0.252025	8.59119	7.94102
0.021	0.0459638	0.575209	-1.53674	5.99308		0.021	0.0459638	-0.25585	2.2849	3.28943
0.021	-0.546042	0.574367	-1.53798	-0.603857		0.021	-0.546042	-0.516077	-1.02753	-1.03043
0.022	-0.548123	0.573587	-1.53935	-0.603326		0.022	-0.548123	-0.82387	-1.02803	-1.03031
0.023	-0.550735	0.572417	-1.53945	-0.605232		0.023	-0.550735	-0.862262	-1.02895	-1.03026
0.023	-0.55365	0.571142	-1.53983	-0.605495		0.023	-0.55365	-0.862812	-1.03019	-1.02976
0.024	-0.556207	0.569488	-1.54048	-0.606051		0.024	-0.556207	-0.862081	-1.02993	-1.03027
0.025	-0.557231	0.567752	-1.5399	-0.608271		0.025	-0.557231	-0.860595	-1.02991	-1.03198
0.025	-0.558757	0.566919	-1.54087	-0.60996		0.025	-0.558757	-0.859818	-1.02939	-1.03354
0.026	-0.559507	0.567134	-1.54183	-0.61131		0.026	-0.559507	-0.859363	-1.02956	-1.03423
0.027	-0.561441	0.566381	-1.54292	-0.612808		0.027	-0.561441	-0.858673	-1.02978	-1.03506
0.027	-0.563368	0.565776	-1.54163	-0.612367		0.027	-0.563368	-0.858202	-1.02967	-1.03614
0.028	-0.565483	0.565651	-1.54042	-0.612726		0.028	-0.565483	-0.858347	-1.02873	-1.03671
0.029	-0.566987	0.565569	-1.5395	-0.613286		0.029	-0.566987	-0.858832	-1.0287	-1.03764
0.029	-0.568972	0.565935	-1.53905	-0.613363		0.029	-0.568972	-0.859295	-1.02794	-1.03747
0.03	-0.570421	0.566844	-1.53909	-0.612311		0.03	-0.570421	-0.859272	-1.02655	-1.0366
0.031	-0.572654	0.567254	-1.5393	-0.612643		0.031	-0.572654	-0.859278	-1.02531	-1.03754
0.031	-0.575592	0.567423	-1.53869	-0.611522		0.031	-0.575592	-0.858839	-1.02475	-1.03875
0.032	-0.577812	0.567239	-1.53852	-0.610108		0.032	-0.577812	-0.857375	-1.02407	-1.03897
0.033	-0.579189	0.568417	-1.53861	-0.609105		0.033	-0.579189	-0.856524	-1.02363	-1.03973
0.033	-0.580922	0.568943	-1.53852	-0.608431		0.033	-0.580922	-0.856173	-1.02231	-1.04104
0.034	-0.580823	0.570464	-1.53801	-0.607586		0.034	-0.580823	-0.855751	-1.02162	-1.04241
0.035	-0.582099	0.572152	-1.53734	-0.607396		0.035	-0.582099	-0.856151	-1.0216	-1.04356
0.035	-0.581048	0.573038	-1.5357	-0.60808		0.035	-0.581048	-0.856636	-1.02064	-1.04392
0.036	-0.580235	0.574558	-1.53375	-0.607375		0.036	-0.580235	-0.856369	-1.01973	-1.04438
0.037	-0.579068	0.576997	-1.53269	-0.604225		0.037	-0.579068	-0.855428	-1.01962	-1.04497
0.037	-0.577944	0.578125	-1.53248	-0.600588		0.037	-0.577944	-0.855135	-1.01996	-1.04578
0.038	-0.577741	0.578806	-1.53179	-0.598424		0.038	-0.577741	-0.855244	-1.02069	-1.04698
0.039	-0.576464	0.580129	-1.53078	-0.595447		0.039	-0.576464	-0.855061	-1.0217	-1.0458
0.039	-0.575536	0.581349	-1.52944	-0.593975		0.039	-0.575536	-0.855236	-1.02299	-1.04179
0.04	-0.573432	0.582977	-1.52804	-0.592521		0.04	-0.573432	-0.855079	-1.02415	-1.03729
0.041	-0.572474	0.583993	-1.52724	-0.592388		0.041	-0.572474	-0.854865	-1.02451	-1.03271
0.041	-0.571291	0.584685	-1.52666	-0.592104		0.041	-0.571291	-0.85557	-1.02488	-1.02782
0.042	-0.570186	0.58565	-1.52665	-0.593346		0.042	-0.570186	-0.856503	-1.02575	-1.02402
0.043	-0.569288	0.586022	-1.52731	-0.592662		0.043	-0.569288	-0.857167	-1.02636	-1.02168
0.043	-0.568147	0.586393	-1.52666	-0.593187		0.043	-0.568147	-0.857789	-1.02688	-1.01986
0.044	-0.567196	0.587291	-1.52637	-0.592139		0.044	-0.567196	-0.858151	-1.0273	-1.01798
0.045	-0.566598	0.588785	-1.52575	-0.591517		0.045	-0.566598	-0.858428	-1.02713	-1.01687
0.045	-0.56585	0.589158	-1.52569	-0.590573		0.045	-0.56585	-0.85945	-1.02648	-1.01697
0.046	-0.566025	0.590551	-1.52559	-0.589802		0.046	-0.566025	-0.86066	-1.02743	-1.01648
0.047	-0.565657	0.591405	-1.52514	-0.588579		0.047	-0.565657	-0.861129	-1.02806	-1.01523
0.047	-0.564649	0.591839	-1.52512	-0.587442		0.047	-0.564649	-0.861926	-1.02801	-1.01384
0.048	-0.563267	0.591793	-1.52531	-0.587301		0.048	-0.563267	-0.862074	-1.02849	-1.01199
0.049	-0.562109	0.59137	-1.52524	-0.586631		0.049	-0.562109	-0.861657	-1.02938	-1.01026
0.049	-0.56111	0.592154	-1.52472	-0.588351		0.049	-0.56111	-0.861408	-1.0307	-1.0092
0.05	-0.560553	0.593748	-1.52397	-0.588825		0.05	-0.560553	-0.860542	-1.03188	-1.00815
0.051	-0.560634	0.594702	-1.52308	-0.589597		0.051	-0.560634	-0.85937	-1.03254	-1.00714
0.051	-0.560435	0.595897	-1.523	-0.589967		0.051	-0.560435	-0.858698	-1.03287	-1.00666
0.052	-0.559535	0.597237	-1.52278	-0.5903		0.052	-0.559535	-0.857427	-1.03358	-1.00628
0.053	-0.558547	0.598617	-1.52354	-0.591975		0.053	-0.558547	-0.855707	-1.0346	-1.00656
0.053	-0.558345	0.598915	-1.5242	-0.592502		0.053	-0.558345	-0.854764	-1.03533	-1.00626
0.054	-0.558358	0.598695	-1.52318	-0.593378		0.054	-0.558358	-0.854237	-1.03521	-1.00585
0.055	-0.558244	0.59919	-1.52258	-0.593538		0.055	-0.558244	-0.85311	-1.03425	-1.0065
0.055	-0.556745	0.600159	-1.52228	-0.59547		0.055	-0.556745	-0.85199	-1.03431	-1.00738
0.056	-0.55584	0.601384	-1.52213	-0.596217		0.056	-0.55584	-0.851458	-1.03494	-1.00719
0.057	-0.555491	0.603281	-1.52221	-0.596827		0.057	-0.555491	-0.850757	-1.03434	-1.0065
0.057	-0.554964	0.604201	-1.52214	-0.597416		0.057	-0.554964	-0.849527	-1.03348	-1.00552
0.058	-0.554253	0.606136	-1.52258	-0.597894		0.058	-0.554253	-0.849863	-1.03259	-1.00351
0.059	-0.553394	0.60767	-1.52272	-0.599796		0.059	-0.553394	-0.849829	-1.03158	-1.00268
0.059	-0.55341	0.608422	-1.52373	-0.601172		0.059	-0.55341	-0.84977	-1.03163	-1.00258
0.06	-0.553235	0.608976	-1.52425	-0.602727		0.06	-0.553235	-0.849853	-1.03157	-1.00311
0.061	-0.551226	0.60992	-1.52513	-0.60465		0.061	-0.551226	-0.849681	-1.03134	-1.00342
0.061	-0.550043	0.610566	-1.52607	-0.6053		0.061	-0.550043	-0.848617	-1.03144	-1.00357
0.062	-0.549861	0.610711	-1.52672	-0.605169		0.062	-0.549861	-0.847091	-1.03175	-1.00298
0.063	-0.548859	0.611098	-1.52824	-0.604089		0.063	-0.548859	-0.845919	-1.03155	-1.00184
0.063	-0.548407	0.610775	-1.52979	-0.603467		0.063	-0.548407	-0.844863	-1.0317	-1.00177
0.064	-0.547431	0.610525	-1.53116	-0.600784		0.064	-0.547431	-0.844474	-1.03285	-1.0006
0.065	-0.546441	0.60936	-1.53285	-0.598289		0.065	-0.546441	-0.845087	-1.03336	-0.998527
0.065	-0.545919	0.608232	-1.53389	-0.595675		0.065	-0.545919	-0.845108	-1.03331	-0.996926
0.066	-0.545254	0.608114	-1.53421	-0.591731		0.066	-0.545254	-0.845192	-1.03339	-0.992784
0.067	-0.544107	0.607377	-1.53506	-0.586854		0.067	-0.544107	-0.844955	-1.03297	-0.986209
0.067	-0.544933	0.606142	-1.53661	-0.579564		0.067	-0.544933	-0.845666	-1.03273	-0.976978
0.068	-0.544262	0.606025	-1.53891	-0.57077		0.068	-0.544262	-0.846475	-1.03264	-0.963886
0.069	-0.545418	0.607757	-1.54086	-0.558218		0.069	-0.545418	-0.846839	-1.03251	-0.948255
0.069	-0.546596	0.608757	-1.54156	-0.543853		0.069	-0.546596	-0.847144	-1.03308	-0.928609
0.07	-0.548426	0.609923	-1.54111	-0.525088		0.07	-0.548426	-0.847374	-1.03295	-0.903664
0.071	-0.549334	0.611823	-1.53861	-0.502831		0.071	-0.549334	-0.846906	-1.03294	-0.87514
0.071	-0.549924	0.614107	-1.53485	-0.474254		0.071	-0.549924	-0.846156	-1.03167	-0.842451
0.072	-0.551218	0.618335	-1.53129	-0.440323		0.072	-0.551218	-0.845816	-1.03099	-0.806722
0.073	-0.552472	0.625769	-1.52717	-0.400177		0.073	-0.552472	-0.845319	-1.02962	-0.770717
0.073	-0.555018	0.635296	-1.52242	-0.353244		0.073	-0.555018	-0.846294	-1.02971	-0.731684
0.074	-0.555819	0.647062	-1.51686	-0.300371		0.074	-0.555819	-0.846579	-1.03037	-0.688352
0.075	-0.555406	0.662738	-1.50943	-0.242495		0.075	-0.555406	-0.845912	-1.03021	-0.642089
0.075	-0.554202	0.679988	-1.49998	-0.178463		0.075	-0.554202	-0.844961	-1.02949	-0.591852
0.076	-0.553553	0.699953	-1.48963	-0.109478		0.076	-0.553553	-0.842611	-1.02902	-0.538328
0.077	-0.553665	0.723761	-1.48045	-0.0330585		0.077	-0.553665	-0.839742	-1.029	-0.481981
0.077	-0.552285	0.750329	-1.47166	0.0489531		0.077	-0.552285	-0.836172	-1.02891	-0.423929
0.078	-0.550939	0.779739	-1.46337	0.13674		0.078	-0.550939	-0.830279	-1.02894	-0.364524
0.079	-0.548426	0.813068	-1.45444	0.226838		0.079	-0.548426	-0.822419	-1.02964	-0.301336
0.079	-0.545521	0.849417	-1.4448	0.321502		0.079	-0.545521	-0.81103	-1.03022	-0.235684
0.08	-0.54352	0.891617	-1.43657	0.41805		0.08	-0.54352	-0.797349	-1.02956	-0.168377
0.081	-0.541006	0.938295	-1.4292	0.516088		0.081	-0.541006	-0.781263	-1.02956	-0.0984459
0.081	-0.539326	0.988117	-1.42213	0.616702		0.081	-0.539326	-0.762412	-1.0295	-0.0256097
0.082	-0.536971	1.04205	-1.41698	0.715687		0.082	-0.536971	-0.74041	-1.0294	0.04973
0.083	-0.534049	1.09725	-1.41333	0.815703		0.083	-0.534049	-0.716224	-1.02894	0.127204
0.083	-0.529783	1.15376	-1.4089	0.917461		0.083	-0.529783	-0.689841	-1.02842	0.207763
0.084	-0.525882	1.21183	-1.4039	1.01814		0.084	-0.525882	-0.661282	-1.02724	0.290562
0.085	-0.52256	1.26977	-1.39955	1.12076		0.085	-0.52256	-0.630902	-1.02627	0.375054
0.085	-0.518724	1.32888	-1.39556	1.22352		0.085	-0.518724	-0.599167	-1.0264	0.461769
0.086	-0.514312	1.38902	-1.3906	1.32837		0.086	-0.514312	-0.566253	-1.02618	0.549702
0.087	-0.510407	1.45046	-1.3862	1.43254		0.087	-0.510407	-0.531742	-1.02578	0.635334
0.087	-0.507072	1.51396	-1.38366	1.53934		0.087	-0.507072	-0.494872	-1.02619	0.720911
0.088	-0.503955	1.57829	-1.38108	1.64608		0.088	-0.503955	-0.456533	-1.02664	0.806733
0.089	-0.49963	1.64416	-1.37717	1.75422		0.089	-0.49963	-0.417379	-1.02669	0.89356
0.089	-0.495609	1.71175	-1.37302	1.86266		0.089	-0.495609	-0.37767	-1.02615	0.978081
0.09	-0.491184	1.78207	-1.36913	1.96961		0.09	-0.491184	-0.335872	-1.02608	1.0589
0.091	-0.486897	1.85522	-1.36529	2.07432		0.091	-0.486897	-0.294521	-1.02649	1.13632
0.091	-0.482859	1.92909	-1.3616	2.17927		0.091	-0.482859	-0.251869	-1.02784	1.21015
0.092	-0.478597	2.00506	-1.35865	2.28176		0.092	-0.478597	-0.208844	-1.02885	1.28207
0.093	-0.474236	2.08242	-1.35576	2.38418		0.093	-0.474236	-0.166472	-1.02904	1.35025
0.093	-0.470062	2.16019	-1.3527	2.48449		0.093	-0.470062	-0.124429	-1.02899	1.41707
0.094	-0.466751	2.23831	-1.34984	2.58233		0.094	-0.466751	-0.0834197	-1.0289	1.4798
0.095	-0.462497	2.31363	-1.34747	2.67719		0.095	-0.462497	-0.0432739	-1.02849	1.53703
0.095	-0.458917	2.38499	-1.34549	2.76845		0.095	-0.458917	-0.00360964	-1.02782	1.58979
0.096	-0.455783	2.45111	-1.3427	2.85362		0.096	-0.455783	0.0340842	-1.02664	1.63819
0.097	-0.451011	2.51424	-1.33903	2.93544		0.097	-0.451011	0.0714604	-1.0255	1.68186
0.097	-0.446345	2.57142	-1.33556	3.01235		0.097	-0.446345	0.108075	-1.02497	1.72163
0.098	-0.441836	2.62453	-1.33277	3.08636		0.098	-0.441836	0.145807	-1.024	1.75603
0.099	-0.43627	2.67151	-1.33031	3.15455		0.099	-0.43627	0.181641	-1.02399	1.78749
0.099	-0.431821	2.71203	-1.32881	3.21998		0.099	-0.431821	0.217165	-1.02455	1.81267
0.1	-0.428162	2.74781	-1.32775	3.27963		0.1	-0.428162	0.251797	-1.02261	1.83153
0.101	-0.423374	2.77987	-1.32589	3.33308		0.101	-0.423374	0.285554	-1.01966	1.84457
0.101	-0.419349	2.80618	-1.32343	3.3822		0.101	-0.419349	0.319825	-1.01619	1.85137
0.102	-0.413877	2.82735	-1.3208	3.425		0.102	-0.413877	0.352567	-1.01329	1.85139
0.102	-0.407799	2.84543	-1.31975	3.46269		0.102	-0.407799	0.384335	-1.01014	1.8443
0.103	-0.401163	2.86047	-1.31977	3.49184		0.103	-0.401163	0.414672	-1.0075	1.82985
0.104	-0.394889	2.87285	-1.32104	3.5131		0.104	-0.394889	0.444406	-1.00419	1.80873
0.104	-0.388726	2.87963	-1.32353	3.52538		0.104	-0.388726	0.473356	-1.00318	1.78136
0.105	-0.382253	2.88299	-1.32621	3.52829		0.105	-0.382253	0.500141	-1.00118	1.74907
0.106	-0.375671	2.8819	-1.32944	3.52371		0.106	-0.375671	0.526055	-1.0016	1.71202
0.106	-0.367722	2.87768	-1.33366	3.50995		0.106	-0.367722	0.551008	-0.999723	1.6696
0.107	-0.361877	2.86973	-1.33884	3.48915		0.107	-0.361877	0.573848	-0.997708	1.62159
0.108	-0.356522	2.85598	-1.34532	3.46063		0.108	-0.356522	0.594634	-0.997379	1.56895
0.108	-0.351439	2.83924	-1.35379	3.42449		0.108	-0.351439	0.61337	-0.996895	1.51232
0.109	-0.347132	2.82021	-1.36295	3.378		0.109	-0.347132	0.631081	-0.996196	1.45316
0.11	-0.342167	2.79698	-1.37098	3.32387		0.11	-0.342167	0.647234	-0.99568	1.39155
0.11	-0.338272	2.76974	-1.37847	3.26116		0.11	-0.338272	0.661467	-0.995247	1.327
0.111	-0.334705	2.7385	-1.386	3.19052		0.111	-0.334705	0.67187	-0.994139	1.26109
0.112	-0.331968	2.70375	-1.39373	3.11429		0.112	-0.331968	0.680326	-0.994618	1.19228
0.112	-0.329324	2.66532	-1.4023	3.03189		0.112	-0.329324	0.685707	-0.992975	1.12001
0.113	-0.326982	2.6208	-1.40981	2.94882		0.113	-0.326982	0.687439	-0.992666	1.04542
0.114	-0.323791	2.57154	-1.41631	2.85985		0.114	-0.323791	0.686042	-0.991896	0.969576
0.114	-0.320732	2.51926	-1.42291	2.76537		0.114	-0.320732	0.680742	-0.991085	0.89064
0.115	-0.317739	2.46424	-1.42773	2.66765		0.115	-0.317739	0.670988	-0.990057	0.80862
0.116	-0.315657	2.4062	-1.43156	2.56806		0.116	-0.315657	0.659512	-0.988809	0.724727
0.116	-0.313473	2.34761	-1.43604	2.46566		0.116	-0.313473	0.646285	-0.988471	0.63784
0.117	-0.311526	2.28735	-1.44094	2.36131		0.117	-0.311526	0.630452	-0.98823	0.549965
0.118	-0.309508	2.22535	-1.44492	2.254		0.118	-0.309508	0.61183	-0.988388	0.459467
0.118	-0.307847	2.16341	-1.44843	2.14374		0.118	-0.307847	0.590844	-0.986816	0.367084
0.119	-0.306182	2.09971	-1.45233	2.03248		0.119	-0.306182	0.567454	-0.986546	0.277021
0.12	-0.304564	2.03537	-1.45616	1.91839		0.12	-0.304564	0.543214	-0.986785	0.190575
0.12	-0.302506	1.9697	-1.45957	1.80166		0.12	-0.302506	0.516556	-0.985684	0.100817
0.121	-0.300014	1.90263	-1.46314	1.68338		0.121	-0.300014	0.487234	-0.983796	0.0106166
0.122	-0.299092	1.83359	-1.46752	1.56346		0.122	-0.299092	0.456238	-0.982218	-0.0800565
0.122	-0.297185	1.76196	-1.47257	1.44228		0.122	-0.297185	0.42452	-0.98007	-0.167793
0.123	-0.295088	1.6872	-1.47728	1.32256		0.123	-0.295088	0.391421	-0.977851	-0.253363
0.124	-0.29333	1.61128	-1.48164	1.20326		0.124	-0.29333	0.357845	-0.97524	-0.335948
0.124	-0.292055	1.53634	-1.48491	1.0842		0.124	-0.292055	0.323859	-0.970895	-0.414341
0.125	-0.290498	1.46012	-1.48687	0.966693		0.125	-0.290498	0.290019	-0.966624	-0.48929
0.126	-0.289476	1.37964	-1.48889	0.850545		0.126	-0.289476	0.255801	-0.960599	-0.560456
0.126	-0.28828	1.2971	-1.49119	0.73587		0.126	-0.28828	0.222505	-0.954776	-0.62985
0.127	-0.287359	1.2169	-1.4936	0.623431		0.127	-0.287359	0.189973	-0.946116	-0.693004
0.128	-0.286581	1.13916	-1.49573	0.512937		0.128	-0.286581	0.158633	-0.939702	-0.752118
0.128	-0.283599	1.06552	-1.49732	0.405969		0.128	-0.283599	0.127608	-0.934062	-0.807702
0.129	-0.280668	0.995396	-1.50009	0.302484		0.129	-0.280668	0.0980877	-0.926626	-0.858916
0.13	-0.279553	0.929886	-1.50346	0.204407		0.13	-0.279553	0.0684589	-0.920242	-0.906085
0.13	-0.278012	0.870415	-1.50572	0.108509		0.13	-0.278012	0.0404215	-0.91211	-0.948137
0.131	-0.276821	0.815545	-1.50767	0.0156946		0.131	-0.276821	0.0119255	-0.903262	-0.985693
0.132	-0.27552	0.76712	-1.50951	-0.0726314		0.132	-0.27552	-0.0142918	-0.893053	-1.01981
0.132	-0.274378	0.724255	-1.51037	-0.157046		0.132	-0.274378	-0.0408376	-0.881636	-1.05014
0.133	-0.273659	0.686474	-1.51034	-0.237778		0.133	-0.273659	-0.0668197	-0.874858	-1.07591
0.134	-0.273167	0.652314	-1.51046	-0.314786		0.134	-0.273167	-0.0904956	-0.867682	-1.09852
0.134	-0.27094	0.622915	-1.51096	-0.387142		0.134	-0.27094	-0.114599	-0.86207	-1.11769
0.135	-0.270568	0.596444	-1.51206	-0.456238		0.135	-0.270568	-0.138097	-0.856417	-1.13275
0.136	-0.271382	0.573369	-1.51328	-0.523741		0.136	-0.271382	-0.160678	-0.850705	-1.14467
0.136	-0.271948	0.552825	-1.51327	-0.58783		0.136	-0.271948	-0.183076	-0.843976	-1.15383
0.137	-0.272479	0.53583	-1.51408	-0.649112		0.137	-0.272479	-0.20433	-0.838085	-1.16069
0.138	-0.273374	0.524246	-1.51465	-0.70501		0.138	-0.273374	-0.224947	-0.8297	-1.16394
0.138	-0.275703	0.513861	-1.5153	-0.758299		0.138	-0.275703	-0.24406	-0.822606	-1.1649
0.139	-0.276521	0.504839	-1.51608	-0.808001		0.139	-0.276521	-0.261472	-0.813291	-1.16451
0.14	-0.27937	0.49685	-1.51742	-0.854368		0.14	-0.27937	-0.276637	-0.804332	-1.16352
0.14	-0.280471	0.491685	-1.51793	-0.898217		0.14	-0.280471	-0.291603	-0.796858	-1.15984
0.141	-0.282088	0.488467	-1.51847	-0.938345		0.141	-0.282088	-0.305204	-0.788521	-1.15563
0.142	-0.283058	0.486476	-1.51883	-0.976752		0.142	-0.283058	-0.318083	-0.780391	-1.15055
0.142	-0.282503	0.484365	-1.51908	-1.01041		0.142	-0.282503	-0.33076	-0.772317	-1.1442
0.143	-0.283436	0.483905	-1.51991	-1.04164		0.143	-0.283436	-0.341205	-0.763297	-1.13737
0.144	-0.283716	0.483434	-1.5213	-1.07096		0.144	-0.283716	-0.350743	-0.752969	-1.12854
0.144	-0.28397	0.484649	-1.52177	-1.09781		0.144	-0.28397	-0.359436	-0.743227	-1.12013
0.145	-0.28408	0.486426	-1.52162	-1.12115		0.145	-0.28408	-0.367658	-0.732387	-1.11047
0.146	-0.283666	0.487716	-1.52112	-1.14148		0.146	-0.283666	-0.374508	-0.722762	-1.09942
0.146	-0.282135	0.490203	-1.52024	-1.15937		0.146	-0.282135	-0.381187	-0.713417	-1.08909
0.147	-0.28164	0.494254	-1.52056	-1.17427		0.147	-0.28164	-0.387186	-0.70436	-1.07944
0.148	-0.280761	0.496874	-1.52071	-1.18666		0.148	-0.280761	-0.391989	-0.695325	-1.0685
0.148	-0.280034	0.498837	-1.51989	-1.19652		0.148	-0.280034	-0.396449	-0.68624	-1.05816
0.149	-0.278406	0.501509	-1.51832	-1.20444		0.149	-0.278406	-0.401736	-0.676728	-1.04737
0.15	-0.277759	0.504949	-1.51649	-1.21009		0.15	-0.277759	-0.407007	-0.667693	-1.03563
0.15	-0.277109	0.5085	-1.51467	-1.21268		0.15	-0.277109	-0.412117	-0.658146	-1.02439
0.151	-0.276658	0.512757	-1.51245	-1.21366		0.151	-0.276658	-0.415503	-0.650314	-1.01289
0.152	-0.276479	0.516783	-1.50984	-1.21278		0.152	-0.276479	-0.419027	-0.642265	-1.00087
0.152	-0.276792	0.522104	-1.50704	-1.21033		0.152	-0.276792	-0.422021	-0.633517	-0.990572
0.153	-0.276693	0.526431	-1.50457	-1.20698		0.153	-0.276693	-0.424077	-0.624848	-0.980299
0.154	-0.276263	0.531619	-1.50087	-1.20166		0.154	-0.276263	-0.426676	-0.6161	-0.96832
0.154	-0.276473	0.536775	-1.49729	-1.1951		0.154	-0.276473	-0.42825	-0.608368	-0.957428
0.155	-0.277725	0.541721	-1.49411	-1.18733		0.155	-0.277725	-0.430809	-0.598357	-0.947389
0.156	-0.278895	0.54785	-1.49015	-1.17752		0.156	-0.278895	-0.433349	-0.590499	-0.938323
0.156	-0.279956	0.553461	-1.48556	-1.16875		0.156	-0.279956	-0.435563	-0.583249	-0.928733
0.157	-0.281429	0.559101	-1.48186	-1.15921		0.157	-0.281429	-0.43849	-0.575799	-0.919694
0.158	-0.282633	0.565582	-1.47876	-1.14819		0.158	-0.282633	-0.442561	-0.569672	-0.909887
0.158	-0.283952	0.571949	-1.476	-1.13601		0.158	-0.283952	-0.445711	-0.564187	-0.90099
0.159	-0.284981	0.57866	-1.47292	-1.12399		0.159	-0.284981	-0.447229	-0.560114	-0.892358
0.16	-0.286083	0.584996	-1.46929	-1.11115		0.16	-0.286083	-0.449015	-0.556961	-0.88339
0.16	-0.287104	0.590093	-1.46485	-1.09844		0.16	-0.287104	-0.451111	-0.55703	-0.875215
0.161	-0.287166	0.594473	-1.46017	-1.08658		0.161	-0.287166	-0.453608	-0.553815	-0.867185
0.162	-0.287538	0.599483	-1.4558	-1.07514		0.162	-0.287538	-0.455608	-0.551028	-0.858452
0.162	-0.288346	0.604875	-1.45088	-1.06282		0.162	-0.288346	-0.457842	-0.549247	-0.849893
0.163	-0.288399	0.610477	-1.44507	-1.05152		0.163	-0.288399	-0.459327	-0.547619	-0.841514
0.164	-0.289064	0.615125	-1.44006	-1.03916		0.164	-0.289064	-0.461254	-0.546958	-0.833189
0.164	-0.289658	0.621925	-1.43546	-1.02691		0.164	-0.289658	-0.462433	-0.546803	-0.82514
0.165	-0.290708	0.627468	-1.4303	-1.01411		0.165	-0.290708	-0.464667	-0.548825	-0.816936
0.166	-0.291975	0.632426	-1.42522	-1.00269		0.166	-0.291975	-0.46729	-0.550599	-0.808746
0.166	-0.292149	0.637177	-1.4211	-0.99078		0.166	-0.292149	-0.468552	-0.550148	-0.800377
0.167	-0.292277	0.642335	-1.41719	-0.980723		0.167	-0.292277	-0.470581	-0.551142	-0.792734
0.168	-0.293068	0.648467	-1.41283	-0.97004		0.168	-0.293068	-0.471885	-0.550958	-0.786719
0.168	-0.294362	0.654134	-1.40807	-0.959408		0.168	-0.294362	-0.474143	-0.55103	-0.780589
0.169	-0.294647	0.66219	-1.40412	-0.947871		0.169	-0.294647	-0.476128	-0.551052	-0.774228
0.17	-0.294736	0.668875	-1.40041	-0.935476		0.17	-0.294736	-0.476755	-0.551536	-0.766836
0.17	-0.295292	0.673626	-1.39542	-0.923551		0.17	-0.295292	-0.477424	-0.550871	-0.758413
0.171	-0.2956	0.67826	-1.38979	-0.912614		0.171	-0.2956	-0.478948	-0.552189	-0.752802
0.172	-0.294836	0.683495	-1.38439	-0.901682		0.172	-0.294836	-0.478677	-0.552478	-0.747416
0.172	-0.294938	0.689895	-1.37806	-0.891163		0.172	-0.294938	-0.479622	-0.553583	-0.741591
0.173	-0.293989	0.694895	-1.3711	-0.881673		0.173	-0.293989	-0.480163	-0.553972	-0.735063
0.174	-0.293218	0.699695	-1.3648	-0.872256		0.174	-0.293218	-0.479714	-0.553414	-0.730347
0.174	-0.292785	0.706026	-1.3593	-0.863064		0.174	-0.292785	-0.480231	-0.553978	-0.724565
0.175	-0.292052	0.711025	-1.35387	-0.854293		0.175	-0.292052	-0.480667	-0.554109	-0.718068
0.176	-0.291809	0.716666	-1.34772	-0.846427		0.176	-0.291809	-0.481207	-0.554422	-0.712442
0.176	-0.291377	0.7214	-1.3401	-0.838474		0.176	-0.291377	-0.482096	-0.555654	-0.707212
0.177	-0.291363	0.726062	-1.33238	-0.828713		0.177	-0.291363	-0.482059	-0.557851	-0.703268
0.178	-0.292159	0.730864	-1.32548	-0.819413		0.178	-0.292159	-0.482269	-0.560119	-0.698632
0.178	-0.293169	0.735783	-1.32033	-0.811306		0.178	-0.293169	-0.482911	-0.562132	-0.693857
0.179	-0.29331	0.739742	-1.31497	-0.803031		0.179	-0.29331	-0.484888	-0.563657	-0.689895
0.18	-0.294009	0.743647	-1.30838	-0.794366		0.18	-0.294009	-0.485971	-0.564491	-0.686094
0.18	-0.29601	0.747818	-1.30158	-0.785812		0.18	-0.29601	-0.4857	-0.565008	-0.680019
0.181	-0.297534	0.752245	-1.29467	-0.777667		0.181	-0.297534	-0.486752	-0.566293	-0.676498
0.182	-0.299198	0.757093	-1.28767	-0.769905		0.182	-0.299198	-0.487067	-0.567312	-0.671318
0.182	-0.301135	0.761579	-1.28077	-0.761666		0.182	-0.301135	-0.486037	-0.56867	-0.665795
0.183	-0.302522	0.765184	-1.27385	-0.754177		0.183	-0.302522	-0.484836	-0.56894	-0.66105
0.184	-0.303946	0.768489	-1.26731	-0.747462		0.184	-0.303946	-0.484112	-0.569952	-0.657263
0.184	-0.305613	0.773577	-1.26092	-0.740338		0.184	-0.305613	-0.484618	-0.568803	-0.652503
0.185	-0.307359	0.778355	-1.25526	-0.732565		0.185	-0.307359	-0.484858	-0.569214	-0.649046
0.186	-0.308502	0.781546	-1.25011	-0.725446		0.186	-0.308502	-0.485034	-0.569088	-0.644602
0.186	-0.30979	0.786235	-1.24341	-0.717581		0.186	-0.30979	-0.486525	-0.568692	-0.640072
0.187	-0.311196	0.791121	-1.23776	-0.710732		0.187	-0.311196	-0.485824	-0.568711	-0.635499
0.188	-0.312339	0.795758	-1.23101	-0.703122		0.188	-0.312339	-0.486012	-0.570384	-0.632126
0.188	-0.311751	0.800186	-1.22305	-0.695752		0.188	-0.311751	-0.485475	-0.57199	-0.628168
0.189	-0.31215	0.803951	-1.21528	-0.689203		0.189	-0.31215	-0.484179	-0.572341	-0.623338
0.19	-0.312921	0.808272	-1.20842	-0.683266		0.19	-0.312921	-0.481759	-0.572386	-0.619169
0.19	-0.312946	0.812374	-1.20037	-0.676691		0.19	-0.312946	-0.479254	-0.573016	-0.61284
0.191	-0.312387	0.815627	-1.19247	-0.670819		0.191	-0.312387	-0.476565	-0.573539	-0.60885
0.192	-0.311631	0.81903	-1.18316	-0.664597		0.192	-0.311631	-0.474908	-0.573858	-0.603602
0.192	-0.310717	0.822108	-1.17451	-0.658469		0.192	-0.310717	-0.47433	-0.574597	-0.598289
0.193	-0.309124	0.825446	-1.16535	-0.651587		0.193	-0.309124	-0.473489	-0.575065	-0.592762
0.194	-0.308194	0.828815	-1.15576	-0.644781		0.194	-0.308194	-0.47232	-0.574851	-0.58707
0.194	-0.307681	0.832718	-1.14663	-0.638198		0.194	-0.307681	-0.471154	-0.575051	-0.581586
0.195	-0.307416	0.836296	-1.13787	-0.630807		0.195	-0.307416	-0.469875	-0.574818	-0.575845
0.196	-0.307021	0.84117	-1.12936	-0.623184		0.196	-0.307021	-0.468106	-0.575485	-0.570058
0.196	-0.306132	0.845555	-1.12048	-0.615318		0.196	-0.306132	-0.466342	-0.575722	-0.565989
0.197	-0.304578	0.850444	-1.11134	-0.608774		0.197	-0.304578	-0.465123	-0.575561	-0.559978
0.198	-0.304386	0.854685	-1.10225	-0.602012		0.198	-0.304386	-0.462834	-0.57463	-0.554041
0.198	-0.303025	0.859712	-1.09183	-0.595776		0.198	-0.303025	-0.461184	-0.572733	-0.548879
0.199	-0.301297	0.865165	-1.08339	-0.588356		0.199	-0.301297	-0.459015	-0.57345	-0.54371
0.2	-0.299688	0.870634	-1.07432	-0.581387		0.2	-0.299688	-0.45679	-0.574364	-0.538327
0.2	-0.298262	0.876866	-1.06362	-0.573102		0.2	-0.298262	-0.453702	-0.574754	-0.532587
0.201	-0.297729	0.882391	-1.05386	-0.56553		0.201	-0.297729	-0.451614	-0.573873	-0.525511
0.202	-0.295577	0.888596	-1.04377	-0.558037		0.202	-0.295577	-0.448191	-0.573003	-0.519231
0.202	-0.294171	0.893742	-1.03254	-0.551383		0.202	-0.294171	-0.445816	-0.572528	-0.512304
0.203	-0.29225	0.899679	-1.02214	-0.545306		0.203	-0.29225	-0.442541	-0.572473	-0.506076
0.204	-0.289947	0.90689	-1.01189	-0.537731		0.204	-0.289947	-0.440363	-0.572642	-0.501088
0.204	-0.287501	0.913939	-1.0018	-0.529865		0.204	-0.287501	-0.436891	-0.572276	-0.493566
0.205	-0.284449	0.921136	-0.991859	-0.521052		0.205	-0.284449	-0.434056	-0.572154	-0.486006
0.206	-0.280767	0.927938	-0.981186	-0.512873		0.206	-0.280767	-0.429997	-0.572801	-0.478956
0.206	-0.277431	0.936511	-0.970629	-0.504025		0.206	-0.277431	-0.42793	-0.573879	-0.472536
0.207	-0.27392	0.944763	-0.95992	-0.494855		0.207	-0.27392	-0.425781	-0.574998	-0.465545
0.208	-0.270308	0.952412	-0.948078	-0.485894		0.208	-0.270308	-0.422833	-0.574334	-0.457274
0.208	-0.267425	0.960945	-0.935459	-0.475501		0.208	-0.267425	-0.419222	-0.573531	-0.448308
0.209	-0.264299	0.96914	-0.922222	-0.464161		0.209	-0.264299	-0.415022	-0.573257	-0.438731
0.21	-0.261008	0.97749	-0.910552	-0.452434		0.21	-0.261008	-0.410794	-0.573193	-0.427651
0.21	-0.257169	0.988028	-0.898842	-0.440788		0.21	-0.257169	-0.407472	-0.573777	-0.416193
0.211	-0.252856	0.998808	-0.886364	-0.428604		0.211	-0.252856	-0.402789	-0.573763	-0.405351
0.212	-0.248208	1.0087	-0.872672	-0.414749		0.212	-0.248208	-0.397837	-0.573768	-0.394266
0.212	-0.244123	1.0198	-0.858649	-0.401111		0.212	-0.244123	-0.392452	-0.574532	-0.380696
0.213	-0.239968	1.03231	-0.844096	-0.387741		0.213	-0.239968	-0.38739	-0.575572	-0.366395
0.214	-0.234018	1.04354	-0.82891	-0.374088		0.214	-0.234018	-0.383996	-0.577204	-0.354936
0.214	-0.227915	1.05662	-0.814298	-0.359112		0.214	-0.227915	-0.380295	-0.578812	-0.340487
0.215	-0.222128	1.0705	-0.798993	-0.342155		0.215	-0.222128	-0.377037	-0.580256	-0.325862
0.216	-0.215991	1.0855	-0.782432	-0.325392		0.216	-0.215991	-0.373874	-0.581492	-0.311071
0.216	-0.209593	1.10235	-0.765755	-0.30708		0.216	-0.209593	-0.37067	-0.582125	-0.294038
0.217	-0.202052	1.1203	-0.747864	-0.289553		0.217	-0.202052	-0.366457	-0.582641	-0.277058
0.218	-0.193025	1.13723	-0.728029	-0.271704		0.218	-0.193025	-0.360848	-0.583519	-0.259386
0.218	-0.183025	1.15434	-0.707831	-0.252942		0.218	-0.183025	-0.354416	-0.58392	-0.240106
0.219	-0.172615	1.173	-0.686918	-0.232688		0.219	-0.172615	-0.347913	-0.584376	-0.219266
0.22	-0.16124	1.19254	-0.666179	-0.214161		0.22	-0.16124	-0.340512	-0.585404	-0.196859
0.22	-0.149317	1.21249	-0.643375	-0.195892		0.22	-0.149317	-0.333425	-0.587036	-0.175143
0.221	-0.137012	1.23383	-0.621177	-0.177226		0.221	-0.137012	-0.325703	-0.587332	-0.15112
0.222	-0.12409	1.25647	-0.599083	-0.156386		0.222	-0.12409	-0.315215	-0.588315	-0.127095
0.222	-0.11082	1.28076	-0.57611	-0.133738		0.222	-0.11082	-0.306235	-0.590571	-0.102102
0.223	-0.0957352	1.30586	-0.551799	-0.110576		0.223	-0.0957352	-0.296801	-0.591007	-0.0769838
0.224	-0.0797365	1.33059	-0.527638	-0.0866289		0.224	-0.0797365	-0.287457	-0.592626	-0.0511509
0.224	-0.0632995	1.35683	-0.501427	-0.0609705		0.224	-0.0632995	-0.275262	-0.593698	-0.0239778
0.225	-0.045775	1.38292	-0.475605	-0.0349191		0.225	-0.045775	-0.262041	-0.594955	0.00272588
0.226	-0.0281128	1.41152	-0.449068	-0.00877463		0.226	-0.0281128	-0.248724	-0.594703	0.02997
0.226	-0.0105325	1.44232	-0.422474	0.0176844		0.226	-0.0105325	-0.235911	-0.595189	0.0566516
0.227	0.00819928	1.47346	-0.39747	0.0434543		0.227	0.00819928	-0.222469	-0.595828	0.0821891
0.228	0.0272139	1.50591	-0.370489	0.0696695		0.228	0.0272139	-0.206555	-0.598154	0.108692
0.228	0.0466589	1.53853	-0.342469	0.0963952		0.228	0.0466589	-0.190061	-0.598954	0.136649
0.229	0.0672859	1.57106	-0.313771	0.123742		0.229	0.0672859	-0.173077	-0.600165	0.165837
0.23	0.0874208	1.60475	-0.28439	0.151036		0.23	0.0874208	-0.15552	-0.601689	0.19796
0.23	0.108342	1.63705	-0.255168	0.178754		0.23	0.108342	-0.137465	-0.603229	0.229413
0.231	0.13153	1.66942	-0.22556	0.207325		0.231	0.13153	-0.118066	-0.60539	0.260312
0.232	0.154912	1.69942	-0.196227	0.23602		0.232	0.154912	-0.0973618	-0.607341	0.291899
0.232	0.178432	1.7302	-0.164882	0.265242		0.232	0.178432	-0.0762267	-0.606166	0.324308
0.233	0.202037	1.76304	-0.132443	0.294455		0.233	0.202037	-0.0537177	-0.606987	0.355528
0.234	0.225242	1.79744	-0.100299	0.322713		0.234	0.225242	-0.0309945	-0.607894	0.387941
0.234	0.249884	1.83306	-0.0669931	0.351432		0.234	0.249884	-0.00606771	-0.610213	0.419701
0.235	0.274938	1.87011	-0.0352246	0.380939		0.235	0.274938	0.0200765	-0.612535	0.451689
0.236	0.299119	1.9073	-0.00277704	0.410896		0.236	0.299119	0.0461544	-0.613148	0.484459
0.236	0.324441	1.94408	0.0301776	0.441339		0.236	0.324441	0.0727928	-0.613709	0.517521
0.237	0.350933	1.98236	0.0634179	0.471979		0.237	0.350933	0.0999105	-0.614927	0.551259
0.238	0.377822	2.02095	0.0960822	0.501743		0.238	0.377822	0.128396	-0.615557	0.584325
0.238	0.40449	2.05991	0.127789	0.530252		0.238	0.40449	0.155894	-0.616487	0.616923
0.239	0.430487	2.0989	0.157797	0.559867		0.239	0.430487	0.184076	-0.615801	0.650142
0.24	0.456341	2.13626	0.186798	0.590071		0.24	0.456341	0.214019	-0.615174	0.683431
0.24	0.482323	2.17285	0.217335	0.619204		0.24	0.482323	0.24416	-0.614473	0.715811
0.241	0.50948	2.2096	0.250213	0.6479		0.241	0.50948	0.275131	-0.615163	0.747183
0.242	0.536751	2.24705	0.282284	0.676172		0.242	0.536751	0.306459	-0.616088	0.777466
0.242	0.563833	2.28472	0.314055	0.703895		0.242	0.563833	0.338743	-0.616035	0.808712
0.243	0.591187	2.32243	0.346216	0.731464		0.243	0.591187	0.370114	-0.614816	0.838792
0.244	0.618117	2.35921	0.37834	0.757918		0.244	0.618117	0.401989	-0.613419	0.8689
0.244	0.645655	2.39487	0.410961	0.78357		0.244	0.645655	0.43471	-0.612888	0.898565
0.245	0.6734	2.43045	0.44301	0.808426		0.245	0.6734	0.467468	-0.611661	0.92791
0.246	0.701192	2.46618	0.474914	0.832509		0.246	0.701192	0.499771	-0.611201	0.955305
0.246	0.729086	2.50167	0.50637	0.85687		0.246	0.729086	0.532632	-0.61047	0.98293
0.247	0.756803	2.5374	0.536025	0.881222		0.247	0.756803	0.56691	-0.609612	1.01168
0.248	0.784453	2.5708	0.566971	0.904718		0.248	0.784453	0.600549	-0.607629	1.03941
0.248	0.811901	2.60305	0.59652	0.926408		0.248	0.811901	0.634277	-0.606689	1.06482
0.249	0.839559	2.63597	0.624897	0.947701		0.249	0.839559	0.668119	-0.60478	1.08981
0.25	0.867054	2.66791	0.654099	0.968468		0.25	0.867054	0.701852	-0.60341	1.11332
0.25	0.893974	2.69835	0.681145	0.989764		0.25	0.893974	0.734093	-0.601135	1.13687
0.251	0.918987	2.72777	0.705636	1.01018		0.251	0.918987	0.765664	-0.599587	1.15839
0.252	0.943062	2.75757	0.731152	1.02932		0.252	0.943062	0.798074	-0.598159	1.17866
0.252	0.96725	2.78654	0.756338	1.04701		0.252	0.96725	0.830596	-0.596978	1.19726
0.253	0.990588	2.81327	0.779881	1.06376		0.253	0.990588	0.861188	-0.595343	1.21413
0.254	1.01408	2.83977	0.802334	1.08036		0.254	1.01408	0.892194	-0.593248	1.23014
0.254	1.03721	2.8657	0.825067	1.09618		0.254	1.03721	0.922976	-0.589014	1.24758
0.255	1.05983	2.889	0.846947	1.11037		0.255	1.05983	0.951709	-0.584901	1.26339
0.256	1.08238	2.91158	0.868053	1.12376		0.256	1.08238	0.982983	-0.580416	1.27774
0.256	1.10278	2.93248	0.88775	1.13707		0.256	1.10278	1.01103	-0.577633	1.29141
0.257	1.12055	2.95322	0.906482	1.15016		0.257	1.12055	1.03963	-0.575258	1.30395
0.258	1.13682	2.97428	0.923548	1.16112		0.258	1.13682	1.06521	-0.572593	1.31468
0.258	1.15254	2.99535	0.940043	1.17101		0.258	1.15254	1.09115	-0.569626	1.32524
0.259	1.16853	3.0147	0.95505	1.18042		0.259	1.16853	1.11639	-0.567173	1.33554
0.26	1.18476	3.03237	0.969359	1.18895		0.26	1.18476	1.14166	-0.564083	1.34359
0.26	1.20089	3.04815	0.983833	1.19789		0.26	1.20089	1.16668	-0.561195	1.35093
0.261	1.21596	3.0617	0.996886	1.20613		0.261	1.21596	1.19056	-0.557214	1.35751
0.262	1.23094	3.07432	1.00892	1.21286		0.262	1.23094	1.21175	-0.553524	1.364
0.262	1.24434	3.08615	1.02128	1.21842		0.262	1.24434	1.23279	-0.549383	1.36967
0.263	1.25823	3.09657	1.03112	1.22439		0.263	1.25823	1.25324	-0.543957	1.37319
0.264	1.2709	3.10756	1.04013	1.23008		0.264	1.2709	1.27354	-0.538141	1.37822
0.264	1.28215	3.11713	1.04889	1.23468		0.264	1.28215	1.29138	-0.532116	1.38198
0.265	1.29269	3.12589	1.05719	1.2392		0.265	1.29269	1.3089	-0.525419	1.38405
0.266	1.30253	3.13385	1.06472	1.24244		0.266	1.30253	1.3265	-0.518384	1.38704
0.266	1.31283	3.14007	1.06941	1.24515		0.266	1.31283	1.3411	-0.509942	1.38935
0.267	1.32336	3.14576	1.07458	1.24815		0.267	1.32336	1.35381	-0.501244	1.38893
0.268	1.33269	3.15114	1.07777	1.2498		0.268	1.33269	1.36666	-0.490758	1.3896
0.268	1.3413	3.15471	1.08267	1.2504		0.268	1.3413	1.37591	-0.479826	1.38945
0.269	1.35012	3.1573	1.08584	1.25136		0.269	1.35012	1.38512	-0.468234	1.38884
0.27	1.35941	3.15993	1.08991	1.25204		0.27	1.35941	1.39306	-0.455886	1.38778
0.27	1.36634	3.16036	1.09304	1.25175		0.27	1.36634	1.40069	-0.443053	1.38584
0.271	1.37232	3.16049	1.09586	1.25143		0.271	1.37232	1.40818	-0.430387	1.38163
0.272	1.37741	3.16008	1.09871	1.25047		0.272	1.37741	1.41658	-0.415965	1.37891
0.272	1.38255	3.15908	1.09988	1.24931		0.272	1.38255	1.42303	-0.401497	1.37608
0.273	1.3881	3.15859	1.10006	1.2475		0.273	1.3881	1.42905	-0.386595	1.37264
0.274	1.3927	3.15753	1.10243	1.24632		0.274	1.3927	1.43481	-0.36964	1.37017
0.274	1.39687	3.15541	1.10272	1.24522		0.274	1.39687	1.43886	-0.351271	1.36707
0.275	1.40064	3.15177	1.10338	1.24394		0.275	1.40064	1.44236	-0.331229	1.36364
0.276	1.40367	3.14869	1.10289	1.24237		0.276	1.40367	1.44477	-0.310759	1.35954
0.276	1.40547	3.14444	1.10244	1.2394		0.276	1.40547	1.44629	-0.290894	1.35444
0.277	1.40768	3.14075	1.1021	1.23605		0.277	1.40768	1.44742	-0.270418	1.34976
0.278	1.40936	3.13667	1.1006	1.23322		0.278	1.40936	1.44705	-0.248389	1.34566
0.278	1.41021	3.13223	1.09801	1.23		0.278	1.41021	1.44678	-0.225431	1.33987
0.279	1.41093	3.1273	1.09491	1.22661		0.279	1.41093	1.44605	-0.200728	1.33415
0.28	1.41115	3.12103	1.09155	1.22241		0.28	1.41115	1.44389	-0.176119	1.32665
0.28	1.41067	3.1142	1.0885	1.21829		0.28	1.41067	1.44133	-0.149859	1.32058
0.281	1.40948	3.10831	1.08574	1.21431		0.281	1.40948	1.43862	-0.123569	1.3135
0.282	1.4082	3.10204	1.08307	1.20994		0.282	1.4082	1.43636	-0.0954474	1.30677
0.282	1.40691	3.09459	1.07835	1.20497		0.282	1.40691	1.43385	-0.0684473	1.29903
0.283	1.40454	3.08659	1.0741	1.19908		0.283	1.40454	1.43067	-0.0406522	1.29058
0.284	1.40132	3.0787	1.0708	1.193		0.284	1.40132	1.42747	-0.0138451	1.28191
0.284	1.39825	3.07041	1.06677	1.18729		0.284	1.39825	1.42398	0.0144362	1.2734
0.285	1.39625	3.06221	1.06103	1.18097		0.285	1.39625	1.4191	0.0443515	1.26455
0.286	1.39368	3.05406	1.05525	1.17411		0.286	1.39368	1.41416	0.0745643	1.25604
0.286	1.39083	3.04548	1.05052	1.16798		0.286	1.39083	1.40949	0.105708	1.24747
0.287	1.38687	3.03631	1.04537	1.16185		0.287	1.38687	1.40423	0.136759	1.23892
0.288	1.3826	3.02657	1.03986	1.15478		0.287	1.3826	1.39797	0.165824	1.22809
0.288	1.37768	3.01689	1.03389	1.14733		0.288	1.37768	1.39129	0.194581	1.21628
0.289	1.37145	3.0073	1.02775	1.14059		0.289	1.37145	1.38365	0.224855	1.20613
0.29	1.36544	2.99766	1.0213	1.13395		0.289	1.36544	1.37621	0.255419	1.19673
0.29	1.36001	2.98813	1.01541	1.12635		0.29	1.36001	1.36835	0.287449	1.18748
0.291	1.35446	2.97707	1.00976	1.11952		0.291	1.35446	1.36093	0.319845	1.17826
0.292	1.34845	2.96552	1.00322	1.11333		0.291	1.34845	1.35341	0.35161	1.16886
0.292	1.34347	2.95339	0.998447	1.10664		0.292	1.34347	1.34543	0.383503	1.15856
0.293	1.33839	2.94205	0.993057	1.09956		0.293	1.33839	1.33708	0.415819	1.14775
0.294	1.33184	2.93072	0.986779	1.09221		0.293	1.33184	1.329	0.448687	1.1373
0.294	1.32567	2.91937	0.980355	1.08497		0.294	1.32567	1.31852	0.481482	1.1278
0.295	1.31922	2.90771	0.974926	1.07846		0.295	1.31922	1.3101	0.515209	1.1188
0.296	1.31227	2.89606	0.968584	1.07183		0.295	1.31227	1.30178	0.54949	1.10959
0.296	1.30398	2.88538	0.961538	1.06522		0.296	1.30398	1.29304	0.5829	1.10032
0.297	1.29617	2.87419	0.955703	1.05827		0.297	1.29617	1.28458	0.615734	1.08999
0.298	1.28824	2.86294	0.949825	1.0509		0.297	1.28824	1.27591	0.648591	1.08012
0.298	1.28049	2.85273	0.942652	1.04357		0.298	1.28049	1.26669	0.680114	1.07016
0.299	1.27222	2.84227	0.93542	1.03615		0.299	1.27222	1.25682	0.711548	1.05946
0.3	1.2633	2.83171	0.929359	1.02862		0.299	1.2633	1.24642	0.742695	1.04983
0.3	1.25479	2.82165	0.923499	1.02107		0.3	1.25479	1.23682	0.774077	1.04092
0.301	1.24592	2.81179	0.917754	1.01399		0.301	1.24592	1.22594	0.803354	1.03132
0.301	1.23705	2.80133	0.911308	1.00729		0.301	1.23705	1.21609	0.830963	1.02142
0.302	1.22799	2.79057	0.905544	1.00002		0.302	1.22799	1.20644	0.855486	1.01215
0.303	1.218	2.77983	0.898606	0.992488		0.303	1.218	1.19614	0.880242	1.00222
0.303	1.20803	2.76956	0.891792	0.9849		0.303	1.20803	1.18698	0.906714	0.992274
0.304	1.19853	2.7592	0.885401	0.977923		0.304	1.19853	1.17762	0.934149	0.984007
0.305	1.18947	2.74798	0.878491	0.971977		0.305	1.18947	1.1671	0.96078	0.974939
0.305	1.17964	2.73637	0.871116	0.966194		0.305	1.17964	1.15694	0.986726	0.964984
0.306	1.17063	2.72482	0.865319	0.959806		0.306	1.17063	1.14632	1.01291	0.956043
0.307	1.1621	2.71373	0.857737	0.952593		0.307	1.1621	1.13534	1.03709	0.947025
0.307	1.15276	2.70324	0.851422	0.94524		0.307	1.15276	1.12519	1.059	0.937709
0.308	1.14244	2.69336	0.843796	0.937747		0.308	1.14244	1.11486	1.07966	0.928896
0.309	1.1327	2.68306	0.837592	0.930742		0.309	1.1327	1.10529	1.10009	0.919974
0.309	1.12407	2.6732	0.830859	0.924568		0.309	1.12407	1.09655	1.1205	0.911116
0.31	1.11517	2.66378	0.822927	0.918225		0.31	1.11517	1.08791	1.14042	0.902116
0.311	1.10615	2.65437	0.814307	0.911912		0.311	1.10615	1.07872	1.15944	0.89192
0.311	1.09733	2.6455	0.807483	0.905525		0.311	1.09733	1.06896	1.17802	0.881469
0.312	1.08813	2.63626	0.800753	0.898812		0.312	1.08813	1.05967	1.19513	0.871646
0.313	1.07817	2.6269	0.794364	0.892097		0.313	1.07817	1.05079	1.21118	0.862824
0.313	1.0676	2.61822	0.787914	0.885275		0.313	1.0676	1.04242	1.22667	0.854407
0.314	1.05725	2.60983	0.780829	0.878416		0.314	1.05725	1.03455	1.24054	0.845935
0.315	1.04765	2.60127	0.774431	0.871715		0.315	1.04765	1.02652	1.2526	0.836828
0.315	1.03668	2.59298	0.768448	0.864569		0.315	1.03668	1.01795	1.26498	0.828008
0.316	1.02653	2.58469	0.761745	0.858223		0.316	1.02653	1.00883	1.27684	0.817718
0.317	1.01823	2.57605	0.753368	0.851609		0.317	1.01823	0.999667	1.28808	0.807086
0.317	1.01024	2.56781	0.74661	0.844648		0.317	1.01024	0.990574	1.29874	0.797335
0.318	1.00178	2.56004	0.740199	0.838974		0.318	1.00178	0.981554	1.3081	0.789433
0.319	0.992618	2.55233	0.7347	0.834325		0.319	0.992618	0.972567	1.31705	0.781552
0.319	0.982785	2.5452	0.728466	0.829271		0.319	0.982785	0.9646	1.32542	0.773038
0.32	0.973027	2.53799	0.721147	0.823428		0.32	0.973027	0.955947	1.33361	0.76497
0.321	0.962298	2.53048	0.713485	0.817385		0.321	0.962298	0.947339	1.34149	0.757454
0.321	0.951964	2.52284	0.709131	0.811216		0.321	0.951964	0.938796	1.34842	0.751495
0.322	0.94241	2.51573	0.702507	0.804488		0.322	0.94241	0.931079	1.35466	0.74483
0.323	0.932843	2.50811	0.695651	0.798357		0.323	0.932843	0.923717	1.36133	0.737025
0.323	0.922804	2.50037	0.689027	0.792862		0.323	0.922804	0.91718	1.36782	0.728212
0.324	0.913258	2.493	0.683061	0.786005		0.324	0.913258	0.910457	1.37325	0.7204
0.325	0.904014	2.48551	0.67612	0.778208		0.325	0.904014	0.902968	1.37831	0.713108
0.325	0.894504	2.47815	0.668528	0.770595		0.325	0.894504	0.895523	1.38301	0.7062
0.326	0.884403	2.47048	0.661389	0.763185		0.326	0.884403	0.888558	1.38686	0.700043
0.327	0.875528	2.46257	0.656784	0.756826		0.327	0.875528	0.88108	1.39118	0.692675
0.327	0.865774	2.45564	0.65142	0.750752		0.327	0.865774	0.873802	1.39427	0.684574
0.328	0.857034	2.44934	0.64527	0.744101		0.328	0.857034	0.867025	1.39615	0.675903
0.329	0.8475	2.44244	0.63922	0.737489		0.329	0.8475	0.859631	1.39722	0.667525
0.329	0.838934	2.43513	0.635042	0.729631		0.329	0.838934	0.851778	1.39747	0.660219
0.33	0.829108	2.42819	0.630376	0.721835		0.33	0.829108	0.843297	1.39835	0.653026
0.331	0.819848	2.42088	0.624973	0.714935		0.331	0.819848	0.834912	1.39945	0.646303
0.331	0.81168	2.41233	0.622483	0.707799		0.331	0.81168	0.826742	1.39937	0.639845
0.332	0.803135	2.40435	0.61731	0.701416		0.332	0.803135	0.819163	1.39877	0.633732
0.333	0.795204	2.39684	0.611873	0.6953		0.333	0.795204	0.812525	1.39769	0.627004
0.333	0.785976	2.38893	0.606264	0.689716		0.333	0.785976	0.806037	1.39603	0.620853
0.334	0.777147	2.38049	0.601612	0.683954		0.334	0.777147	0.799418	1.39435	0.615161
0.335	0.768991	2.37279	0.596346	0.677899		0.335	0.768991	0.792655	1.39252	0.610191
0.335	0.760691	2.3656	0.590755	0.672637		0.335	0.760691	0.78513	1.39056	0.604535
0.336	0.752156	2.35814	0.58634	0.667258		0.336	0.752156	0.777419	1.38827	0.59834
0.337	0.743628	2.35016	0.580645	0.661414		0.337	0.743628	0.769541	1.38549	0.592694
0.337	0.736466	2.34242	0.574603	0.655771		0.337	0.736466	0.761276	1.38321	0.587031
0.338	0.727343	2.33599	0.569899	0.650068		0.338	0.727343	0.752849	1.38011	0.581611
0.339	0.72047	2.33044	0.564977	0.644095		0.339	0.72047	0.745631	1.37591	0.576559
0.339	0.711609	2.32473	0.559881	0.636961		0.339	0.711609	0.737985	1.37	0.570417
0.34	0.70265	2.31827	0.55506	0.631156		0.34	0.70265	0.730594	1.36481	0.563899
0.341	0.694377	2.31199	0.550326	0.625243		0.341	0.694377	0.723214	1.36004	0.558072
0.341	0.686073	2.30628	0.54741	0.619205		0.341	0.686073	0.715552	1.35472	0.55272
0.342	0.677995	2.29849	0.543356	0.613206		0.342	0.677995	0.707251	1.34819	0.546985
0.343	0.668841	2.2907	0.539119	0.606762		0.343	0.668841	0.698742	1.34236	0.541334
0.343	0.660703	2.28344	0.535881	0.600614		0.343	0.660703	0.690025	1.33636	0.536118
0.344	0.654352	2.27634	0.533344	0.595476		0.344	0.654352	0.681934	1.32965	0.531482
0.345	0.647748	2.26899	0.529567	0.589973		0.345	0.647748	0.674562	1.32231	0.527434
0.345	0.641029	2.26231	0.526448	0.583997		0.345	0.641029	0.667239	1.3158	0.524014
0.346	0.635262	2.25513	0.522802	0.578952		0.346	0.635262	0.660071	1.30879	0.520944
0.347	0.629859	2.24841	0.51974	0.573523		0.347	0.629859	0.652108	1.30064	0.516962
0.347	0.623408	2.24109	0.516475	0.567237		0.347	0.623408	0.644556	1.29293	0.512239
0.348	0.616855	2.23447	0.5124	0.561488		0.348	0.616855	0.637415	1.28511	0.508077
0.349	0.610799	2.22742	0.507742	0.556176		0.349	0.610799	0.629334	1.27712	0.504102
0.349	0.604998	2.22067	0.503603	0.550666		0.349	0.604998	0.621109	1.2691	0.500691
0.35	0.597163	2.21377	0.501603	0.545274		0.35	0.597163	0.613783	1.26141	0.498066
0.351	0.588889	2.20668	0.498485	0.540543		0.351	0.588889	0.606268	1.25286	0.494385
0.351	0.581722	2.20002	0.494362	0.535098		0.351	0.581722	0.600459	1.24387	0.489691
0.352	0.575399	2.19341	0.490159	0.529495		0.352	0.575399	0.593801	1.23485	0.484277
0.353	0.569533	2.1875	0.486845	0.522688		0.353	0.569533	0.585633	1.22573	0.480058
0.353	0.564276	2.18137	0.483256	0.516599		0.353	0.564276	0.578615	1.21583	0.476227
0.354	0.558831	2.17477	0.480037	0.51113		0.354	0.558831	0.571983	1.206	0.47203
0.355	0.553086	2.16863	0.47492	0.506299		0.355	0.553086	0.566108	1.19816	0.468247
0.355	0.547913	2.16296	0.47102	0.501575		0.355	0.547913	0.559844	1.19061	0.464071
0.356	0.542638	2.15662	0.467927	0.496247		0.356	0.542638	0.552663	1.18186	0.459898
0.357	0.537544	2.15103	0.463931	0.490598		0.357	0.537544	0.544746	1.1723	0.456688
0.357	0.532114	2.14515	0.459543	0.484686		0.357	0.532114	0.536615	1.1627	0.453731
0.358	0.527607	2.13956	0.456645	0.479371		0.358	0.527607	0.528675	1.15256	0.449876
0.359	0.523302	2.13475	0.453702	0.474531		0.359	0.523302	0.521882	1.14191	0.446109
0.359	0.518637	2.12886	0.451318	0.469897		0.359	0.518637	0.515184	1.13198	0.442598
0.36	0.513572	2.12309	0.447087	0.46514		0.36	0.513572	0.507873	1.1219	0.439342
0.361	0.50926	2.11718	0.442838	0.460729		0.361	0.50926	0.501962	1.11127	0.436971
0.361	0.504584	2.11127	0.438966	0.456943		0.361	0.504584	0.495668	1.101	0.434236
0.362	0.500005	2.10561	0.434768	0.452793		0.362	0.500005	0.490566	1.09038	0.431322
0.363	0.495334	2.09947	0.430722	0.448125		0.363	0.495334	0.485175	1.08049	0.428229
0.363	0.492277	2.09351	0.425137	0.443679		0.363	0.492277	0.479978	1.07027	0.425176
0.364	0.489124	2.08798	0.420219	0.439139		0.364	0.489124	0.474609	1.05875	0.422544
0.365	0.484081	2.08258	0.414424	0.43483		0.365	0.484081	0.468736	1.04762	0.420259
0.365	0.479173	2.0774	0.410767	0.430576		0.365	0.479173	0.463787	1.03715	0.417576
0.366	0.473724	2.07216	0.408118	0.426098		0.366	0.473724	0.458845	1.02664	0.414176
0.367	0.469478	2.06746	0.404497	0.421269		0.367	0.469478	0.452822	1.01596	0.410994
0.367	0.465873	2.06242	0.400309	0.416573		0.367	0.465873	0.446399	1.00479	0.408426
0.368	0.46143	2.05854	0.396789	0.412303		0.368	0.46143	0.440614	0.993852	0.405045
0.369	0.456218	2.05445	0.393001	0.407508		0.369	0.456218	0.435735	0.982863	0.401437
0.369	0.451709	2.0505	0.3894	0.402484		0.369	0.451709	0.431107	0.972066	0.398504
0.37	0.446968	2.04575	0.386014	0.397781		0.37	0.446968	0.426693	0.961205	0.395575
0.371	0.441519	2.04165	0.38288	0.393118		0.371	0.441519	0.421729	0.949025	0.39274
0.371	0.436794	2.03729	0.379442	0.388137		0.371	0.436794	0.417249	0.936778	0.390191
0.372	0.431211	2.03241	0.375614	0.383532		0.372	0.431211	0.41184	0.925702	0.387089
0.373	0.427425	2.02794	0.372306	0.379447		0.373	0.427425	0.407201	0.915352	0.384482
0.373	0.423244	2.02375	0.369688	0.375416		0.373	0.423244	0.402796	0.904981	0.381641
0.374	0.418627	2.01884	0.366592	0.371715		0.374	0.418627	0.397272	0.894455	0.37882
0.375	0.41502	2.01417	0.363207	0.36801		0.375	0.41502	0.39252	0.884289	0.375847
0.375	0.409505	2.01129	0.359756	0.364653		0.375	0.409505	0.38845	0.874614	0.372803
0.376	0.406657	2.00887	0.356289	0.361905		0.376	0.406657	0.384519	0.864399	0.369126
0.377	0.403343	2.00528	0.352527	0.358329		0.377	0.403343	0.380326	0.853593	0.365299
0.377	0.399717	2.00118	0.348799	0.353296		0.377	0.399717	0.375521	0.842835	0.362123
0.378	0.395688	1.99693	0.344815	0.348952		0.378	0.395688	0.370363	0.83192	0.359709
0.379	0.39105	1.99263	0.340174	0.345508		0.379	0.39105	0.365654	0.820518	0.356215
0.379	0.386291	1.98922	0.337203	0.341716		0.379	0.386291	0.361776	0.809803	0.353267
0.38	0.382194	1.98497	0.334263	0.338092		0.38	0.382194	0.358192	0.800393	0.350206
0.381	0.379058	1.98064	0.331568	0.335216		0.381	0.379058	0.354304	0.791068	0.347457
0.381	0.375862	1.97719	0.329539	0.332015		0.381	0.375862	0.350372	0.782127	0.343816
0.382	0.37224	1.9738	0.328199	0.328298		0.382	0.37224	0.347281	0.772582	0.34123
0.383	0.367319	1.96929	0.325147	0.324749		0.383	0.367319	0.34549	0.762786	0.339145
0.383	0.364401	1.96517	0.322151	0.320349		0.383	0.364401	0.342853	0.753279	0.33639
0.384	0.362911	1.9624	0.31992	0.314629		0.384	0.362911	0.339501	0.743596	0.334325
0.385	0.35977	1.95902	0.317736	0.310449		0.385	0.35977	0.335597	0.734181	0.332332
0.385	0.355117	1.95511	0.314434	0.306234		0.385	0.355117	0.331625	0.724793	0.331096
0.386	0.351312	1.95091	0.311295	0.303236		0.386	0.351312	0.328623	0.715245	0.329616
0.387	0.348012	1.94712	0.308788	0.299686		0.387	0.348012	0.324621	0.705954	0.328078
0.387	0.345195	1.94322	0.30688	0.295436		0.387	0.345195	0.321189	0.696782	0.326377
0.388	0.34205	1.9391	0.304566	0.29161		0.388	0.34205	0.317717	0.68717	0.324118
0.389	0.339378	1.93499	0.302119	0.287943		0.389	0.339378	0.313215	0.677257	0.321845
0.389	0.335186	1.93104	0.301096	0.28437		0.389	0.335186	0.310034	0.668093	0.320083
0.39	0.330236	1.92721	0.300212	0.280795		0.39	0.330236	0.307336	0.659184	0.318032
0.391	0.327941	1.92328	0.298544	0.277147		0.391	0.327941	0.30463	0.650555	0.315528
0.391	0.323323	1.91853	0.296481	0.274436		0.391	0.323323	0.303025	0.642596	0.313144
0.392	0.318706	1.91419	0.295052	0.271353		0.392	0.318706	0.300694	0.635424	0.311266
0.393	0.313628	1.91178	0.292915	0.267473		0.393	0.313628	0.29709	0.626789	0.308265
0.393	0.309008	1.90889	0.291322	0.264317		0.393	0.309008	0.294557	0.617356	0.305283
0.394	0.304358	1.9064	0.289045	0.260891		0.394	0.304358	0.292229	0.609015	0.30229
0.395	0.300186	1.90332	0.286602	0.257663		0.395	0.300186	0.288429	0.601151	0.299886
0.395	0.296826	1.90065	0.284998	0.253122		0.395	0.296826	0.283898	0.593427	0.298048
0.396	0.293381	1.89872	0.281958	0.250248		0.396	0.293381	0.27976	0.585619	0.295416
0.397	0.289559	1.89624	0.281389	0.247843		0.397	0.289559	0.276879	0.576931	0.292403
0.397	0.286091	1.89298	0.279558	0.244543		0.397	0.286091	0.274056	0.569028	0.288463
0.398	0.283212	1.89001	0.278257	0.240516		0.398	0.283212	0.270956	0.561707	0.284555
0.399	0.280645	1.887	0.276845	0.236663		0.399	0.280645	0.267125	0.554235	0.281166
0.399	0.276711	1.88497	0.275463	0.233518		0.399	0.276711	0.263823	0.546589	0.278235
0.4	0.27258	1.88154	0.2733	0.230083		0.4	0.27258	0.261624	0.538783	0.275579
0.401	0.267961	1.87986	0.270908	0.226592		0.401	0.267961	0.259354	0.531145	0.272126
0.401	0.263566	1.87717	0.268761	0.222762		0.401	0.263566	0.256663	0.522737	0.268848
0.402	0.260229	1.87539	0.266815	0.219286		0.402	0.260229	0.253318	0.51482	0.266205
0.403	0.259149	1.8724	0.264585	0.216364		0.403	0.259149	0.250449	0.507728	0.262982
0.403	0.25652	1.86996	0.262815	0.214544		0.403	0.25652	0.247966	0.500056	0.259305
0.404	0.252432	1.86787	0.261136	0.212264		0.404	0.252432	0.245742	0.492863	0.255666
0.405	0.249286	1.86604	0.259437	0.209974		0.405	0.249286	0.243824	0.486104	0.251316
0.405	0.245946	1.86338	0.258362	0.206853		0.405	0.245946	0.241597	0.478937	0.247607
0.406	0.241441	1.86193	0.256892	0.203942		0.406	0.241441	0.23875	0.471416	0.244442
0.407	0.23779	1.86046	0.254113	0.201283		0.407	0.23779	0.235822	0.4642	0.240622
0.407	0.234994	1.85897	0.251058	0.197489		0.407	0.234994	0.234413	0.456912	0.236928
0.408	0.231475	1.8567	0.248506	0.194835		0.408	0.231475	0.232476	0.449487	0.233824
0.409	0.229707	1.85533	0.245628	0.190967		0.409	0.229707	0.229391	0.442255	0.230146
0.409	0.226365	1.85264	0.243009	0.187137		0.409	0.226365	0.226806	0.43513	0.22707
0.41	0.222679	1.84974	0.240526	0.182855		0.41	0.222679	0.224957	0.428177	0.225214
0.411	0.218813	1.8479	0.238164	0.178986		0.411	0.218813	0.223438	0.421614	0.222272
0.411	0.214659	1.84529	0.236728	0.176394		0.411	0.214659	0.221097	0.415069	0.218349
0.412	0.211489	1.84312	0.236491	0.173416		0.412	0.211489	0.21895	0.408576	0.214567
0.413	0.207934	1.84118	0.234644	0.168916		0.413	0.207934	0.216548	0.40166	0.210098
0.413	0.203143	1.8396	0.231321	0.165518		0.413	0.203143	0.213359	0.394832	0.205349
0.414	0.198356	1.83908	0.228235	0.162904		0.414	0.198356	0.209838	0.388313	0.200839
0.415	0.19452	1.83724	0.224936	0.15984		0.415	0.19452	0.206169	0.382376	0.197138
0.415	0.191279	1.83514	0.221319	0.157254		0.415	0.191279	0.202596	0.376694	0.193467
0.416	0.18739	1.83339	0.21862	0.154904		0.416	0.18739	0.199158	0.370235	0.189915
0.417	0.183753	1.83225	0.215678	0.15268		0.417	0.183753	0.195903	0.362472	0.18639
0.417	0.180168	1.8304	0.212438	0.151258		0.417	0.180168	0.193096	0.356251	0.182896
0.418	0.178515	1.8282	0.208787	0.148553		0.418	0.178515	0.190133	0.350115	0.180145
0.419	0.177821	1.82684	0.206616	0.145606		0.419	0.177821	0.186804	0.344332	0.176669
0.419	0.175164	1.82685	0.204823	0.143027		0.419	0.175164	0.184619	0.338358	0.172608
0.42	0.171225	1.82544	0.202245	0.141243		0.42	0.171225	0.18332	0.332077	0.168745
0.421	0.167432	1.82476	0.199084	0.140033		0.421	0.167432	0.180768	0.32613	0.165746
0.421	0.165406	1.82399	0.196326	0.138981		0.421	0.165406	0.177709	0.321071	0.162704
0.422	0.162039	1.82354	0.19433	0.137364		0.422	0.162039	0.175179	0.315336	0.15862
0.423	0.159184	1.82174	0.191638	0.135152		0.423	0.159184	0.172659	0.310113	0.154248
0.423	0.157508	1.82027	0.18918	0.13257		0.423	0.157508	0.170225	0.304233	0.150224
0.424	0.154389	1.81832	0.186723	0.130032		0.424	0.154389	0.167871	0.298106	0.14626
0.425	0.153071	1.81673	0.184102	0.126815		0.425	0.153071	0.164839	0.292182	0.141969
0.425	0.151694	1.81485	0.181694	0.124006		0.425	0.151694	0.161979	0.285855	0.137923
0.426	0.149114	1.81088	0.178665	0.121849		0.426	0.149114	0.160191	0.279514	0.13524
0.427	0.148535	1.8075	0.176338	0.119584		0.427	0.148535	0.157731	0.274727	0.132865
0.427	0.146963	1.80485	0.174943	0.116954		0.427	0.146963	0.154386	0.269286	0.130118
0.428	0.145007	1.80228	0.174041	0.114012		0.428	0.145007	0.151693	0.263747	0.12734
0.429	0.141858	1.79976	0.172901	0.111872		0.429	0.141858	0.149587	0.258606	0.12426
0.429	0.139656	1.79661	0.171532	0.109268		0.429	0.139656	0.147603	0.252767	0.121167
0.43	0.138527	1.79423	0.169836	0.106655		0.43	0.138527	0.145217	0.247373	0.118283
0.431	0.136082	1.79258	0.168627	0.105154		0.431	0.136082	0.14194	0.242687	0.116103
0.431	0.133041	1.79098	0.167437	0.103355		0.431	0.133041	0.138491	0.237277	0.113473
0.432	0.130893	1.78856	0.165595	0.100721		0.432	0.130893	0.13544	0.232148	0.110001
0.433	0.129144	1.78639	0.163551	0.0988223		0.433	0.129144	0.132245	0.226909	0.106735
0.433	0.127358	1.78459	0.162008	0.0965708		0.433	0.127358	0.128657	0.222399	0.104069
0.434	0.126101	1.78085	0.161354	0.0940155		0.434	0.126101	0.125749	0.218373	0.101742
0.435	0.12493	1.77723	0.160015	0.0919989		0.435	0.12493	0.122925	0.214298	0.0984199
0.435	0.124124	1.77382	0.158633	0.08957		0.435	0.124124	0.121131	0.21021	0.0952739
0.436	0.120121	1.77066	0.157472	0.0867419		0.436	0.120121	0.118221	0.205411	0.0929223
0.437	0.117851	1.76885	0.155131	0.0833206		0.437	0.117851	0.113981	0.200422	0.0901553
0.437	0.116792	1.76584	0.151305	0.0805031		0.437	0.116792	0.110156	0.195821	0.087831
0.438	0.115633	1.76263	0.147972	0.0767865		0.438	0.115633	0.10686	0.190619	0.0864797
0.439	0.113615	1.76073	0.145196	0.0739155		0.439	0.113615	0.104086	0.185099	0.084036
0.439	0.112916	1.75765	0.141891	0.0707612		0.439	0.112916	0.101067	0.179992	0.0811791
0.44	0.111835	1.75388	0.14035	0.0669064		0.44	0.111835	0.0986317	0.174658	0.0789973
0.441	0.110621	1.75109	0.138247	0.0647391		0.441	0.110621	0.0950808	0.16924	0.076644
0.441	0.11048	1.74889	0.136196	0.0617531		0.441	0.11048	0.0914484	0.164656	0.0738925
0.442	0.108839	1.74598	0.134759	0.0602039		0.442	0.108839	0.0885716	0.160256	0.0718073
0.443	0.107594	1.74352	0.133149	0.0568092		0.443	0.107594	0.0855551	0.156987	0.0708807
0.443	0.106691	1.74086	0.132697	0.054827		0.443	0.106691	0.0815652	0.154271	0.0685554
0.444	0.104302	1.73758	0.131687	0.0538904		0.444	0.104302	0.0779969	0.150488	0.0658513
0.445	0.103578	1.7352	0.129986	0.0507029		0.445	0.103578	0.0748316	0.14618	0.0646881
0.445	0.100985	1.73318	0.12736	0.0486069		0.445	0.100985	0.070972	0.141711	0.0622579
0.446	0.0995069	1.73141	0.125003	0.0472646		0.446	0.0995069	0.0666474	0.137809	0.0607718
0.447	0.100071	1.72886	0.123399	0.0453481		0.447	0.100071	0.0631163	0.133067	0.059015
0.447	0.0989235	1.72463	0.122291	0.0425136		0.447	0.0989235	0.0601601	0.127977	0.0575536
0.448	0.0980464	1.72196	0.121056	0.0391747		0.448	0.0980464	0.0565076	0.123181	0.0556586
0.449	0.0969068	1.71847	0.120215	0.036041		0.449	0.0969068	0.0527156	0.118291	0.0536218
0.449	0.0957333	1.71494	0.118331	0.0329836		0.449	0.0957333	0.0494178	0.114117	0.0516757
0.45	0.094675	1.7113	0.116015	0.0308279		0.45	0.094675	0.0459458	0.109754	0.0492483
0.451	0.0930534	1.7075	0.114289	0.0291695		0.451	0.0930534	0.0441499	0.105308	0.0474878
0.451	0.0890691	1.7047	0.113192	0.0265639		0.451	0.0890691	0.0418561	0.101538	0.0442213
0.452	0.0850367	1.70145	0.111609	0.0242525		0.452	0.0850367	0.0393859	0.0974981	0.041342
0.453	0.0816071	1.69736	0.109398	0.021562		0.453	0.0816071	0.0364654	0.0940218	0.0389991
0.453	0.0790092	1.69293	0.107363	0.0189771		0.453	0.0790092	0.0330389	0.0906484	0.0363013
0.454	0.0767012	1.68914	0.105335	0.0165202		0.454	0.0767012	0.0295932	0.0858193	0.0341373
0.455	0.0733966	1.68719	0.103065	0.013124		0.455	0.0733966	0.0271598	0.0810012	0.0313258
0.455	0.0710668	1.68315	0.101219	0.0105223		0.455	0.0710668	0.0248524	0.0764179	0.0287219
0.456	0.069139	1.68166	0.0997529	0.00792564		0.456	0.069139	0.0218473	0.0713582	0.0264782
0.457	0.0666733	1.67893	0.0985894	0.00634188		0.457	0.0666733	0.018387	0.0673493	0.0253108
0.457	0.0639333	1.67796	0.0976947	0.004659		0.457	0.0639333	0.0152254	0.0633808	0.0233098
0.458	0.0602405	1.67656	0.0969655	0.00347289		0.458	0.0602405	0.0125245	0.0593205	0.0218124
0.459	0.0584368	1.67544	0.0967482	0.00149785		0.459	0.0584368	0.0100742	0.0557952	0.0199309
0.459	0.0567956	1.67448	0.0962461	-0.000544177		0.459	0.0567956	0.00746321	0.0522284	0.0170442
0.46	0.0543257	1.67285	0.0947548	-0.00254887		0.46	0.0543257	0.00521818	0.0488012	0.0139782
0.461	0.0519486	1.67005	0.0926574	-0.00480116		0.461	0.0519486	0.00279127	0.0454799	0.0110423
0.461	0.0498959	1.66736	0.0903632	-0.00727389		0.461	0.0498959	0.00118724	0.0417236	0.00845489
0.462	0.0474762	1.665	0.0879118	-0.00841338		0.462	0.0474762	-0.000801177	0.0380179	0.00564251
0.463	0.0452608	1.66229	0.0860146	-0.00934023		0.463	0.0452608	-0.00317971	0.0347959	0.00330751
0.463	0.0415979	1.66096	0.0843631	-0.0107956		0.463	0.0415979	-0.00569134	0.0320566	0.000850758
0.464	0.0398863	1.65763	0.0827375	-0.0123916		0.464	0.0398863	-0.00746314	0.0282495	-0.00238344
0.465	0.0387734	1.65645	0.0806567	-0.0141023		0.465	0.0387734	-0.0083944	0.0244516	-0.00596854
0.465	0.0355019	1.65572	0.0782031	-0.0155198		0.465	0.0355019	-0.00976066	0.0216098	-0.008154
0.466	0.0333588	1.65309	0.0760567	-0.0178574		0.466	0.0333588	-0.0122528	0.0179282	-0.0105514
0.467	0.0325332	1.65082	0.07408	-0.019357		0.467	0.0325332	-0.0151143	0.0144332	-0.014238
0.467	0.0308484	1.6492	0.0719252	-0.0197952		0.467	0.0308484	-0.0169913	0.010178	-0.0170581
0.468	0.0278952	1.64723	0.0703591	-0.0215006		0.468	0.0278952	-0.0191631	0.00617268	-0.01911
0.469	0.025114	1.64444	0.0698896	-0.0224357		0.469	0.025114	-0.0221122	0.0031176	-0.0216113
0.469	0.0244375	1.64277	0.0692066	-0.0225429		0.469	0.0244375	-0.0238362	0.000278899	-0.0247856
0.47	0.0229451	1.63951	0.0684973	-0.0237102		0.47	0.0229451	-0.0249612	-0.00319424	-0.0267711
0.471	0.020737	1.63667	0.0685402	-0.0248657		0.47	0.020737	-0.0263455	-0.00603892	-0.0291293
0.471	0.0187983	1.63665	0.0694493	-0.0265556		0.471	0.0187983	-0.0278757	-0.0093207	-0.0329139
0.472	0.0175504	1.63397	0.0693283	-0.0270163		0.472	0.0175504	-0.0304571	-0.0126068	-0.0359641
0.473	0.0158769	1.63143	0.0694638	-0.0268801		0.472	0.0158769	-0.0315498	-0.0154994	-0.0377553
0.473	0.0137649	1.62935	0.0697144	-0.0271414		0.473	0.0137649	-0.0323321	-0.0182017	-0.0396101
0.474	0.0111219	1.62686	0.0696667	-0.0273913		0.474	0.0111219	-0.0340359	-0.0197459	-0.0413753
0.475	0.0075739	1.62419	0.0693514	-0.0293331		0.474	0.0075739	-0.0363579	-0.0233846	-0.0436235
0.475	0.00504912	1.62308	0.0681417	-0.030542		0.475	0.00504912	-0.0384919	-0.0269442	-0.0461194
0.476	0.00203958	1.62116	0.0670314	-0.0310582		0.476	0.00203958	-0.0398921	-0.0302819	-0.0490944
0.477	-8.03324e-05	1.61851	0.0650265	-0.0330973		0.476	-8.03324e-05	-0.0404748	-0.0344645	-0.0522161
0.477	-0.00241321	1.61786	0.0630404	-0.0355462		0.477	-0.00241321	-0.0417847	-0.0387765	-0.0551011
0.478	-0.00576894	1.61645	0.0617843	-0.0368149		0.478	-0.00576894	-0.0426069	-0.0425098	-0.0584368
0.479	-0.00690312	1.61458	0.0607017	-0.0394917		0.478	-0.00690312	-0.0425522	-0.0450757	-0.0606081
0.479	-0.00891199	1.61102	0.0596579	-0.0407023		0.479	-0.00891199	-0.0431704	-0.0489652	-0.0637795
0.48	-0.0123394	1.60888	0.0581965	-0.0412682		0.48	-0.0123394	-0.043786	-0.0524466	-0.0665872
0.481	-0.0146374	1.60758	0.0561174	-0.0427367		0.48	-0.0146374	-0.0445925	-0.0555794	-0.0689584
0.481	-0.0170418	1.6057	0.0544579	-0.0445599		0.481	-0.0170418	-0.0447398	-0.058681	-0.0711546
0.482	-0.0194848	1.60424	0.0532409	-0.0457734		0.482	-0.0194848	-0.0448977	-0.0627547	-0.0735061
0.483	-0.0211028	1.60282	0.0521076	-0.0476662		0.482	-0.0211028	-0.0462065	-0.0668343	-0.0757141
0.483	-0.0229915	1.60268	0.0509452	-0.0492855		0.483	-0.0229915	-0.0474327	-0.0697497	-0.0781901
0.484	-0.0254831	1.60218	0.0500904	-0.0512978		0.484	-0.0254831	-0.0486552	-0.072199	-0.079697
0.485	-0.0265547	1.60128	0.0500897	-0.0515534		0.484	-0.0265547	-0.0499981	-0.0752869	-0.0799223
0.485	-0.0275534	1.60049	0.0490925	-0.0522753		0.485	-0.0275534	-0.0504705	-0.0785399	-0.0803464
0.486	-0.0280724	1.59887	0.0476116	-0.0527996		0.486	-0.0280724	-0.0513529	-0.0820892	-0.0809746
0.487	-0.0286407	1.59831	0.0469381	-0.0541354		0.486	-0.0286407	-0.0520257	-0.0844138	-0.0830939
0.487	-0.0292294	1.5961	0.0467621	-0.0552581		0.487	-0.0292294	-0.0539188	-0.0860941	-0.0863222
0.488	-0.0308601	1.59326	0.0460962	-0.0562119		0.488	-0.0308601	-0.0558956	-0.0887524	-0.0888935
0.489	-0.0324795	1.59154	0.0445511	-0.0586652		0.488	-0.0324795	-0.0569416	-0.0919321	-0.0905996
0.489	-0.0342857	1.5897	0.0432718	-0.0599712		0.489	-0.0342857	-0.0582528	-0.0939274	-0.0924044
0.49	-0.0356715	1.58783	0.0412045	-0.06072		0.49	-0.0356715	-0.0595083	-0.0967748	-0.0949705
0.491	-0.036755	1.58527	0.0391447	-0.0620032		0.49	-0.036755	-0.0602814	-0.1	-0.0977759
0.491	-0.0380458	1.58401	0.0371137	-0.0639064		0.491	-0.0380458	-0.0623981	-0.103843	-0.100494
0.492	-0.0399137	1.58146	0.0346402	-0.064909		0.492	-0.0399137	-0.0652982	-0.107075	-0.102987
0.493	-0.0411892	1.5806	0.0331771	-0.0656419		0.492	-0.0411892	-0.0677275	-0.110044	-0.105022
0.493	-0.0421288	1.57973	0.0328105	-0.0668036		0.493	-0.0421288	-0.0709517	-0.113071	-0.107174
0.494	-0.0427536	1.57886	0.032302	-0.0686975		0.494	-0.0427536	-0.0728521	-0.115888	-0.108842
0.495	-0.0451225	1.57845	0.0316402	-0.0698856		0.494	-0.0451225	-0.0754575	-0.118326	-0.111158
0.495	-0.0460598	1.57811	0.0307665	-0.0716291		0.495	-0.0460598	-0.0778358	-0.121075	-0.11384
0.496	-0.0474524	1.57759	0.0298716	-0.0737752		0.496	-0.0474524	-0.0806261	-0.125119	-0.117361
0.497	-0.0488939	1.5762	0.0291412	-0.0751629		0.496	-0.0488939	-0.082965	-0.129542	-0.120313
0.497	-0.0505311	1.57619	0.0278399	-0.0762987		0.497	-0.0505311	-0.0858269	-0.133288	-0.122988
0.498	-0.0524573	1.57417	0.0266536	-0.0786113		0.498	-0.0524573	-0.0886834	-0.136436	-0.123232
0.498	-0.0529646	1.57238	0.0256284	-0.0804588		0.498	-0.0529646	-0.0907522	-0.139449	-0.125009
0.499	-0.0542984	1.57204	0.0246136	-0.0827382		0.499	-0.0542984	-0.0921923	-0.142447	-0.126589
0.5	-0.0573697	1.57148	0.0239377	-0.0859906		0.5	-0.0573697	-0.093915	-0.145769	-0.126662
0.5	-0.0600065	1.5711	0.0235642	-0.0890198		0.5	-0.0600065	-0.0963127	-0.148071	-0.127158
0.501	-0.0613841	1.57078	0.0223043	-0.0913406		0.501	-0.0613841	-0.0988387	-0.15132	-0.12905
0.502	-0.0623124	1.57033	0.0207189	-0.0943818		0.502	-0.0623124	-0.101604	-0.155011	-0.13053
0.502	-0.0642979	1.5693	0.0189148	-0.0955183		0.502	-0.0642979	-0.102954	-0.159159	-0.132491
0.503	-0.0669784	1.56903	0.0181919	-0.0964503		0.503	-0.0669784	-0.10484	-0.162444	-0.134529
0.504	-0.0689498	1.56915	0.0179884	-0.0981194		0.504	-0.0689498	-0.105942	-0.166167	-0.136858
0.504	-0.0703313	1.5665	0.0165265	-0.0989478		0.504	-0.0703313	-0.108528	-0.169847	-0.136493
0.505	-0.0726014	1.56568	0.0158443	-0.101994		0.505	-0.0726014	-0.109318	-0.172285	-0.138292
0.506	-0.0745797	1.56487	0.0150731	-0.104253		0.506	-0.0745797	-0.110881	-0.174389	-0.139639
0.506	-0.076383	1.56492	0.0137748	-0.104261		0.506	-0.076383	-0.112921	-0.177066	-0.141975
0.507	-0.0774376	1.56474	0.0126161	-0.106212		0.507	-0.0774376	-0.115326	-0.180173	-0.144204
0.508	-0.0785448	1.5643	0.0110758	-0.107833		0.508	-0.0785448	-0.115818	-0.18179	-0.145937
0.508	-0.0794943	1.56244	0.00968188	-0.10891		0.508	-0.0794943	-0.116181	-0.183914	-0.147289
0.509	-0.0801345	1.56206	0.00830589	-0.11123		0.509	-0.0801345	-0.117689	-0.187029	-0.148984
0.51	-0.0806407	1.5622	0.0074768	-0.112074		0.51	-0.0806407	-0.118495	-0.189534	-0.150981
0.51	-0.0799944	1.56063	0.00727286	-0.111764		0.51	-0.0799944	-0.118328	-0.19152	-0.152214
0.511	-0.0793671	1.55849	0.006783	-0.113249		0.511	-0.0793671	-0.118903	-0.194752	-0.153908
0.512	-0.0801494	1.55784	0.00560869	-0.114673		0.512	-0.0801494	-0.12103	-0.197663	-0.156189
0.512	-0.0799087	1.55819	0.00355859	-0.117052		0.512	-0.0799087	-0.123461	-0.199278	-0.158285
0.513	-0.0796003	1.55691	0.00251746	-0.120053		0.513	-0.0796003	-0.125181	-0.200611	-0.161093
0.514	-0.0800129	1.55583	0.00156591	-0.123193		0.514	-0.0800129	-0.127303	-0.202922	-0.162492
0.514	-0.0800426	1.55487	-5.51758e-05	-0.124435		0.514	-0.0800426	-0.128432	-0.205316	-0.163924
0.515	-0.0799828	1.5535	-0.00193159	-0.126309		0.515	-0.0799828	-0.13042	-0.206229	-0.165736
0.516	-0.0799616	1.55191	-0.00326313	-0.126535		0.516	-0.0799616	-0.132362	-0.206583	-0.168034
0.516	-0.0792905	1.55029	-0.00482081	-0.129073		0.516	-0.0792905	-0.13294	-0.206364	-0.16971
0.517	-0.0789914	1.54808	-0.00616931	-0.132039		0.517	-0.0789914	-0.134772	-0.207845	-0.171978
0.518	-0.0795441	1.54614	-0.00824009	-0.135062		0.518	-0.0795441	-0.136657	-0.209367	-0.175696
0.518	-0.0804113	1.54443	-0.00927184	-0.138626		0.518	-0.0804113	-0.137779	-0.211045	-0.178402
0.519	-0.0804602	1.54234	-0.00933644	-0.140733		0.519	-0.0804602	-0.139286	-0.211066	-0.181021
0.52	-0.081761	1.54089	-0.0091229	-0.142039		0.52	-0.081761	-0.142224	-0.213255	-0.182989
0.52	-0.0814675	1.5389	-0.00858168	-0.144855		0.52	-0.0814675	-0.143312	-0.215688	-0.184081
0.521	-0.0809719	1.5373	-0.00826552	-0.146305		0.521	-0.0809719	-0.143769	-0.217393	-0.18558
0.522	-0.0813622	1.53534	-0.00755672	-0.148012		0.522	-0.0813622	-0.145352	-0.218657	-0.188039
0.522	-0.0818452	1.53301	-0.00805338	-0.14955		0.522	-0.0818452	-0.146114	-0.221141	-0.190807
0.523	-0.0829388	1.53226	-0.00906124	-0.151684		0.523	-0.0829388	-0.146277	-0.221825	-0.193259
0.524	-0.0831479	1.53041	-0.0102024	-0.153569		0.524	-0.0831479	-0.147226	-0.22257	-0.195209
0.524	-0.0833644	1.52749	-0.011002	-0.154926		0.524	-0.0833644	-0.148388	-0.223576	-0.19592
0.525	-0.0845727	1.52689	-0.0112458	-0.157267		0.525	-0.0845727	-0.148907	-0.225429	-0.196661
0.526	-0.0864518	1.52445	-0.0122264	-0.160039		0.526	-0.0864518	-0.149974	-0.22691	-0.198302
0.526	-0.0884431	1.52242	-0.0140173	-0.161717		0.526	-0.0884431	-0.151364	-0.228671	-0.199337
0.527	-0.0904012	1.52097	-0.0161891	-0.162448		0.527	-0.0904012	-0.15261	-0.231052	-0.200088
0.528	-0.0915425	1.51855	-0.0181222	-0.163758		0.528	-0.0915425	-0.153911	-0.234197	-0.201494
0.528	-0.0933138	1.51584	-0.0196906	-0.165509		0.528	-0.0933138	-0.155415	-0.236765	-0.201488
0.529	-0.0954323	1.51448	-0.0211852	-0.166997		0.529	-0.0954323	-0.156065	-0.239125	-0.201996
0.53	-0.0969192	1.51332	-0.0233057	-0.170253		0.53	-0.0969192	-0.158083	-0.24054	-0.203426
0.53	-0.0980116	1.51057	-0.024108	-0.17206		0.53	-0.0980116	-0.158767	-0.241919	-0.20497
0.531	-0.0981171	1.50824	-0.0236673	-0.172561		0.531	-0.0981171	-0.159527	-0.24331	-0.207861
0.532	-0.0989637	1.50665	-0.0239332	-0.174458		0.532	-0.0989637	-0.1613	-0.246908	-0.210111
0.532	-0.0996926	1.50471	-0.0248479	-0.175882		0.532	-0.0996926	-0.162284	-0.24863	-0.212149
0.533	-0.0993528	1.5018	-0.0262858	-0.17772		0.533	-0.0993528	-0.16246	-0.251229	-0.214081
0.534	-0.0990526	1.49995	-0.0279524	-0.178431		0.534	-0.0990526	-0.162206	-0.254389	-0.2155
0.534	-0.0993997	1.4988	-0.0295992	-0.179584		0.534	-0.0993997	-0.162229	-0.256374	-0.217126
0.535	-0.10008	1.49785	-0.031631	-0.180283		0.535	-0.10008	-0.161394	-0.258631	-0.218114
0.536	-0.101049	1.497	-0.0328773	-0.183077		0.536	-0.101049	-0.161495	-0.260153	-0.218368
0.536	-0.101708	1.4965	-0.0344185	-0.186081		0.536	-0.101708	-0.162229	-0.262435	-0.219841
0.537	-0.101595	1.49579	-0.0362652	-0.188584		0.537	-0.101595	-0.16348	-0.264561	-0.221437
0.538	-0.102642	1.49541	-0.0382137	-0.190411		0.538	-0.102642	-0.164491	-0.265295	-0.223609
0.538	-0.103646	1.49451	-0.0402845	-0.190419		0.538	-0.103646	-0.166309	-0.267338	-0.225782
0.539	-0.103172	1.49335	-0.0425171	-0.193245		0.539	-0.103172	-0.166952	-0.269631	-0.227826
0.54	-0.102818	1.49029	-0.0443405	-0.196043		0.54	-0.102818	-0.168618	-0.271277	-0.229163
0.54	-0.10302	1.48978	-0.0458956	-0.198826		0.54	-0.10302	-0.16991	-0.273732	-0.231599
0.541	-0.102583	1.48797	-0.0471086	-0.199935		0.541	-0.102583	-0.170843	-0.275622	-0.234573
0.542	-0.103282	1.48658	-0.0478681	-0.203125		0.542	-0.103282	-0.17202	-0.277282	-0.237292
0.542	-0.104586	1.48491	-0.0483134	-0.205642		0.542	-0.104586	-0.172534	-0.278859	-0.240107
0.543	-0.106371	1.48335	-0.0494976	-0.208548		0.543	-0.106371	-0.174024	-0.281261	-0.242354
0.544	-0.108379	1.48149	-0.0514441	-0.2118		0.544	-0.108379	-0.177314	-0.283602	-0.244942
0.544	-0.109537	1.48095	-0.053624	-0.214378		0.544	-0.109537	-0.179824	-0.284569	-0.246956
0.545	-0.110867	1.47936	-0.0546923	-0.216273		0.545	-0.110867	-0.180262	-0.286769	-0.249248
0.546	-0.112966	1.47681	-0.0550011	-0.21771		0.546	-0.112966	-0.180749	-0.288479	-0.251019
0.546	-0.115692	1.47543	-0.0556446	-0.21914		0.546	-0.115692	-0.181783	-0.290903	-0.252228
0.547	-0.11759	1.47398	-0.056397	-0.219967		0.547	-0.11759	-0.182475	-0.293049	-0.254663
0.548	-0.118763	1.47247	-0.0581007	-0.221372		0.548	-0.118763	-0.184178	-0.2943	-0.257344
0.548	-0.120113	1.47056	-0.0599666	-0.222971		0.548	-0.120113	-0.186414	-0.29683	-0.258444
0.549	-0.121872	1.47027	-0.061257	-0.225304		0.549	-0.121872	-0.1874	-0.299838	-0.260904
0.55	-0.124217	1.46815	-0.0619046	-0.225305		0.55	-0.124217	-0.190009	-0.304111	-0.263328
0.55	-0.12611	1.46686	-0.0619087	-0.224007		0.55	-0.12611	-0.19173	-0.307622	-0.265547
0.551	-0.128045	1.46686	-0.0616154	-0.224604		0.551	-0.128045	-0.193703	-0.310566	-0.267083
0.552	-0.12976	1.46569	-0.0623255	-0.22568		0.552	-0.12976	-0.196002	-0.312373	-0.268573
0.552	-0.131556	1.46611	-0.0638758	-0.227919		0.552	-0.131556	-0.198445	-0.316172	-0.271831
0.553	-0.132755	1.46605	-0.065376	-0.230903		0.553	-0.132755	-0.199122	-0.320046	-0.273965
0.554	-0.134398	1.46593	-0.066959	-0.232184		0.554	-0.134398	-0.199496	-0.323524	-0.276437
0.554	-0.136061	1.46602	-0.0684994	-0.232862		0.554	-0.136061	-0.201658	-0.325764	-0.277977
0.555	-0.137796	1.46609	-0.0698846	-0.234193		0.555	-0.137796	-0.203133	-0.328597	-0.280115
0.556	-0.139338	1.46541	-0.0721572	-0.236958		0.556	-0.139338	-0.203148	-0.331846	-0.281498
0.556	-0.140202	1.46378	-0.0743424	-0.239562		0.556	-0.140202	-0.204732	-0.336217	-0.283501
0.557	-0.142075	1.46332	-0.0757539	-0.241611		0.557	-0.142075	-0.206865	-0.339052	-0.284002
0.558	-0.14324	1.4635	-0.0776744	-0.243067		0.558	-0.14324	-0.208312	-0.342006	-0.287243
0.558	-0.143481	1.46333	-0.0798998	-0.244875		0.558	-0.143481	-0.209689	-0.3452	-0.289754
0.559	-0.142554	1.46274	-0.081647	-0.246407		0.559	-0.142554	-0.209716	-0.349323	-0.290497
0.56	-0.142585	1.46215	-0.0831654	-0.248167		0.56	-0.142585	-0.210508	-0.351301	-0.291879
0.56	-0.143179	1.46101	-0.0842579	-0.249202		0.56	-0.143179	-0.211547	-0.353116	-0.29471
0.561	-0.143721	1.46	-0.0853662	-0.250562		0.561	-0.143721	-0.21254	-0.355385	-0.296833
0.562	-0.143463	1.45854	-0.0871483	-0.251865		0.562	-0.143463	-0.212804	-0.358255	-0.299091
0.562	-0.143694	1.45693	-0.0886564	-0.253563		0.562	-0.143694	-0.214829	-0.358969	-0.300857
0.563	-0.144135	1.45514	-0.0901688	-0.253808		0.563	-0.144135	-0.214282	-0.360633	-0.301783
0.564	-0.144892	1.45408	-0.0924549	-0.255003		0.564	-0.144892	-0.214888	-0.362484	-0.302858
0.564	-0.146451	1.45357	-0.0958804	-0.256		0.564	-0.146451	-0.21625	-0.364498	-0.305018
0.565	-0.147119	1.45282	-0.0986631	-0.256532		0.565	-0.147119	-0.217135	-0.365586	-0.306847
0.566	-0.147233	1.45149	-0.100671	-0.256613		0.566	-0.147233	-0.218237	-0.367531	-0.309258
0.566	-0.147502	1.45048	-0.101535	-0.255687		0.566	-0.147502	-0.218581	-0.369024	-0.311297
0.567	-0.148069	1.44833	-0.102888	-0.25651		0.567	-0.148069	-0.221002	-0.370681	-0.315758
0.568	-0.148356	1.44645	-0.104788	-0.257927		0.568	-0.148356	-0.221426	-0.373257	-0.319693
0.568	-0.149521	1.44476	-0.105662	-0.258646		0.568	-0.149521	-0.223217	-0.375436	-0.322728
0.569	-0.149627	1.44339	-0.107422	-0.259091		0.569	-0.149627	-0.22528	-0.377626	-0.325532
0.57	-0.150122	1.44097	-0.108696	-0.259235		0.57	-0.150122	-0.226389	-0.379102	-0.328627
0.57	-0.15063	1.43815	-0.110513	-0.259437		0.57	-0.15063	-0.226895	-0.380831	-0.331101
0.571	-0.149631	1.43538	-0.112876	-0.259224		0.571	-0.149631	-0.228472	-0.38328	-0.334171
0.572	-0.149182	1.43304	-0.114428	-0.260272		0.572	-0.149182	-0.230713	-0.384569	-0.336375
0.572	-0.150618	1.43169	-0.117005	-0.259631		0.572	-0.150618	-0.232615	-0.386906	-0.339313
0.573	-0.151659	1.4315	-0.119727	-0.26103		0.573	-0.151659	-0.234225	-0.389683	-0.342449
0.574	-0.153536	1.43016	-0.122293	-0.261079		0.574	-0.153536	-0.233868	-0.391396	-0.343973
0.574	-0.155938	1.4294	-0.125161	-0.261191		0.574	-0.155938	-0.235335	-0.393733	-0.344863
0.575	-0.157782	1.42827	-0.126468	-0.261166		0.575	-0.157782	-0.236479	-0.396133	-0.346514
0.576	-0.158297	1.42575	-0.1288	-0.260902		0.576	-0.158297	-0.238345	-0.398666	-0.347647
0.576	-0.158785	1.42416	-0.130308	-0.261246		0.576	-0.158785	-0.238508	-0.400006	-0.349714
0.577	-0.159117	1.42264	-0.132116	-0.262456		0.577	-0.159117	-0.238401	-0.402095	-0.350758
0.578	-0.159825	1.42088	-0.133975	-0.261989		0.578	-0.159825	-0.239389	-0.404114	-0.352226
0.578	-0.160198	1.41891	-0.135984	-0.261551		0.578	-0.160198	-0.241736	-0.405889	-0.352088
0.579	-0.159671	1.41762	-0.137237	-0.260669		0.579	-0.159671	-0.24277	-0.407718	-0.351757
0.58	-0.158964	1.41679	-0.138269	-0.260012		0.58	-0.158964	-0.244006	-0.410188	-0.352217
0.58	-0.158329	1.41531	-0.139487	-0.26021		0.58	-0.158329	-0.244427	-0.411157	-0.352612
0.581	-0.158557	1.41461	-0.140311	-0.259685		0.581	-0.158557	-0.244619	-0.413844	-0.353138
0.582	-0.158988	1.41465	-0.141223	-0.260308		0.582	-0.158988	-0.245009	-0.416491	-0.353975
0.582	-0.158625	1.41272	-0.143204	-0.260279		0.582	-0.158625	-0.245886	-0.418562	-0.353936
0.583	-0.159091	1.41229	-0.144669	-0.262201		0.583	-0.159091	-0.245077	-0.420538	-0.353839
0.584	-0.159829	1.41068	-0.145861	-0.26422		0.584	-0.159829	-0.245716	-0.420966	-0.35436
0.584	-0.159343	1.40796	-0.14793	-0.264542		0.584	-0.159343	-0.245947	-0.422826	-0.355141
0.585	-0.158162	1.40543	-0.150513	-0.263631		0.585	-0.158162	-0.245243	-0.426154	-0.355631
0.586	-0.157433	1.40194	-0.151186	-0.264011		0.586	-0.157433	-0.245954	-0.427894	-0.355634
0.586	-0.156762	1.39926	-0.152613	-0.264577		0.586	-0.156762	-0.246984	-0.429065	-0.355693
0.587	-0.156188	1.39712	-0.155026	-0.264737		0.587	-0.156188	-0.248007	-0.430059	-0.355992
0.588	-0.156441	1.3958	-0.157601	-0.266181		0.588	-0.156441	-0.247928	-0.432097	-0.355976
0.588	-0.156698	1.39315	-0.160952	-0.267595		0.588	-0.156698	-0.248856	-0.434213	-0.356771
0.589	-0.156366	1.39188	-0.162566	-0.267592		0.589	-0.156366	-0.25084	-0.434843	-0.357058
0.59	-0.156251	1.39084	-0.163329	-0.26758		0.59	-0.156251	-0.25189	-0.435635	-0.357959
0.59	-0.156406	1.38919	-0.163854	-0.267074		0.59	-0.156406	-0.252405	-0.437519	-0.358493
0.591	-0.157139	1.38687	-0.165143	-0.26678		0.591	-0.157139	-0.252545	-0.439168	-0.357809
0.592	-0.15832	1.38479	-0.165933	-0.265239		0.592	-0.15832	-0.253047	-0.440535	-0.359065
0.592	-0.159433	1.38437	-0.166844	-0.264137		0.592	-0.159433	-0.254265	-0.440626	-0.361707
0.593	-0.161058	1.38312	-0.167525	-0.263492		0.593	-0.161058	-0.255868	-0.44365	-0.362568
0.594	-0.162011	1.38181	-0.168483	-0.263624		0.594	-0.162011	-0.257022	-0.446874	-0.362096
0.594	-0.162488	1.38044	-0.170096	-0.262867		0.594	-0.162488	-0.258837	-0.448518	-0.363015
0.595	-0.163026	1.38001	-0.171795	-0.262929		0.595	-0.163026	-0.26097	-0.449375	-0.364569
0.596	-0.163549	1.37889	-0.173288	-0.26395		0.596	-0.163549	-0.262134	-0.451643	-0.365411
0.596	-0.164407	1.37812	-0.173556	-0.265196		0.596	-0.164407	-0.263474	-0.453478	-0.36669
0.597	-0.165464	1.37677	-0.174419	-0.266553		0.597	-0.165464	-0.264661	-0.454384	-0.368
0.598	-0.165985	1.3744	-0.175152	-0.26812		0.598	-0.165985	-0.265882	-0.456753	-0.367531
0.598	-0.167	1.37336	-0.175371	-0.26948		0.598	-0.167	-0.267614	-0.458639	-0.366814
0.599	-0.168518	1.37314	-0.175102	-0.271195		0.599	-0.168518	-0.269832	-0.460381	-0.366466
0.6	-0.169948	1.37241	-0.175944	-0.272875		0.6	-0.169948	-0.271353	-0.461926	-0.366997
0.6	-0.171267	1.3712	-0.176424	-0.274142		0.6	-0.171267	-0.272292	-0.463859	-0.365869
0.601	-0.172481	1.36954	-0.176783	-0.274731		0.601	-0.172481	-0.274823	-0.463909	-0.365033
0.602	-0.172775	1.36798	-0.177732	-0.276599		0.602	-0.172775	-0.274912	-0.464787	-0.365139
0.602	-0.172817	1.36709	-0.179469	-0.279036		0.602	-0.172817	-0.27475	-0.465622	-0.366022
0.603	-0.173631	1.36724	-0.181102	-0.280745		0.603	-0.173631	-0.275798	-0.467919	-0.366382
0.604	-0.173918	1.36661	-0.182955	-0.282061		0.604	-0.173918	-0.277366	-0.46951	-0.36741
0.604	-0.175141	1.3669	-0.183808	-0.28392		0.604	-0.175141	-0.278225	-0.470927	-0.367418
0.605	-0.176731	1.36598	-0.1842	-0.285168		0.605	-0.176731	-0.278314	-0.471244	-0.367275
0.606	-0.178164	1.3647	-0.184051	-0.286813		0.606	-0.178164	-0.278764	-0.471569	-0.366945
0.606	-0.179216	1.36256	-0.184538	-0.287901		0.606	-0.179216	-0.28015	-0.471266	-0.366312
0.607	-0.178633	1.35963	-0.185816	-0.289567		0.607	-0.178633	-0.2823	-0.471358	-0.366159
0.608	-0.178234	1.35664	-0.186113	-0.291345		0.608	-0.178234	-0.283683	-0.472036	-0.365802
0.608	-0.178445	1.35414	-0.187068	-0.293065		0.608	-0.178445	-0.285559	-0.472402	-0.36627
0.609	-0.179314	1.3524	-0.1874	-0.294328		0.609	-0.179314	-0.285834	-0.474131	-0.367102
0.61	-0.180738	1.35034	-0.189113	-0.295245		0.61	-0.180738	-0.287482	-0.476166	-0.367138
0.61	-0.182208	1.34923	-0.189852	-0.295904		0.61	-0.182208	-0.289536	-0.477222	-0.367914
0.611	-0.183546	1.34794	-0.189642	-0.296944		0.611	-0.183546	-0.290959	-0.477773	-0.367342
0.612	-0.184503	1.34599	-0.190322	-0.299062		0.612	-0.184503	-0.292624	-0.477814	-0.369028
0.612	-0.185606	1.34426	-0.191823	-0.301677		0.612	-0.185606	-0.293542	-0.479643	-0.371338
0.613	-0.187382	1.34312	-0.193275	-0.304407		0.613	-0.187382	-0.294396	-0.481272	-0.372598
0.614	-0.189696	1.34293	-0.196009	-0.305552		0.614	-0.189696	-0.296252	-0.482623	-0.3742
0.614	-0.19148	1.3419	-0.197738	-0.307813		0.614	-0.19148	-0.298824	-0.483219	-0.374873
0.615	-0.193783	1.34026	-0.198273	-0.309492		0.615	-0.193783	-0.300494	-0.483802	-0.376755
0.616	-0.19613	1.3393	-0.198694	-0.31064		0.616	-0.19613	-0.301279	-0.485137	-0.378539
0.616	-0.197309	1.33867	-0.19875	-0.311728		0.616	-0.197309	-0.303478	-0.486058	-0.380564
0.617	-0.198377	1.33857	-0.200386	-0.312977		0.617	-0.198377	-0.304929	-0.487435	-0.381518
0.618	-0.200176	1.33874	-0.202639	-0.314274		0.618	-0.200176	-0.305802	-0.488891	-0.381541
0.618	-0.202578	1.33887	-0.204389	-0.316644		0.618	-0.202578	-0.307308	-0.489798	-0.382769
0.619	-0.205267	1.33957	-0.207529	-0.317933		0.619	-0.205267	-0.308922	-0.490523	-0.383698
0.62	-0.208413	1.34032	-0.209685	-0.31809		0.62	-0.208413	-0.309095	-0.491215	-0.385991
0.62	-0.211658	1.34116	-0.211419	-0.319683		0.62	-0.211658	-0.309521	-0.490817	-0.387992
0.621	-0.213788	1.34135	-0.212551	-0.321019		0.621	-0.213788	-0.310749	-0.491702	-0.390801
0.622	-0.215225	1.34176	-0.213411	-0.321305		0.622	-0.215225	-0.312869	-0.492634	-0.391312
0.622	-0.216853	1.34144	-0.215559	-0.321718		0.622	-0.216853	-0.31423	-0.493845	-0.393765
0.623	-0.218932	1.3404	-0.21766	-0.321842		0.623	-0.218932	-0.314934	-0.494587	-0.395969
0.624	-0.220353	1.3393	-0.219727	-0.323141		0.624	-0.220353	-0.316388	-0.49564	-0.397776
0.624	-0.221168	1.33926	-0.221148	-0.325036		0.624	-0.221168	-0.317601	-0.496001	-0.399786
0.625	-0.222123	1.33843	-0.222215	-0.327478		0.625	-0.222123	-0.318112	-0.497256	-0.401896
0.626	-0.223412	1.3362	-0.224219	-0.329212		0.626	-0.223412	-0.319626	-0.497514	-0.40324
0.626	-0.224757	1.33426	-0.225944	-0.330352		0.626	-0.224757	-0.320425	-0.497829	-0.40545
0.627	-0.225864	1.33263	-0.227568	-0.331373		0.627	-0.225864	-0.321372	-0.498166	-0.408182
0.628	-0.226296	1.3316	-0.227182	-0.33341		0.628	-0.226296	-0.321333	-0.4988	-0.40999
0.628	-0.226911	1.32974	-0.228318	-0.335029		0.628	-0.226911	-0.321983	-0.499934	-0.410467
0.629	-0.227399	1.32785	-0.228473	-0.334898		0.629	-0.227399	-0.322726	-0.501062	-0.412321
0.63	-0.226963	1.3265	-0.229124	-0.335332		0.63	-0.226963	-0.324729	-0.501849	-0.414858
0.63	-0.226857	1.32641	-0.230318	-0.335712		0.63	-0.226857	-0.326392	-0.503587	-0.415415
0.631	-0.226863	1.32647	-0.23148	-0.335506		0.631	-0.226863	-0.327514	-0.503823	-0.418303
0.632	-0.226734	1.32453	-0.233288	-0.335454		0.632	-0.226734	-0.328145	-0.505105	-0.421444
0.632	-0.227446	1.32223	-0.236079	-0.335251		0.632	-0.227446	-0.329484	-0.506842	-0.424317
0.633	-0.228532	1.3202	-0.238323	-0.335491		0.633	-0.228532	-0.331602	-0.507206	-0.425832
0.634	-0.227997	1.31953	-0.240495	-0.335671		0.634	-0.227997	-0.332497	-0.507828	-0.427953
0.634	-0.227246	1.31901	-0.243794	-0.335582		0.634	-0.227246	-0.333491	-0.509137	-0.429455
0.635	-0.227235	1.31727	-0.245273	-0.334995		0.635	-0.227235	-0.337125	-0.509569	-0.429877
0.636	-0.228114	1.31492	-0.246952	-0.335654		0.636	-0.228114	-0.340176	-0.509986	-0.430948
0.636	-0.228663	1.31178	-0.248167	-0.336594		0.636	-0.228663	-0.342102	-0.510106	-0.432104
0.637	-0.229658	1.30916	-0.248577	-0.337535		0.637	-0.229658	-0.343265	-0.510842	-0.43222
0.638	-0.230679	1.30663	-0.249182	-0.338885		0.638	-0.230679	-0.344533	-0.511657	-0.433829
0.638	-0.230099	1.30466	-0.251481	-0.340467		0.638	-0.230099	-0.346132	-0.514354	-0.435822
0.639	-0.230701	1.30291	-0.252851	-0.342145		0.639	-0.230701	-0.346894	-0.516248	-0.437838
0.64	-0.230867	1.30232	-0.25368	-0.344887		0.64	-0.230867	-0.34822	-0.51918	-0.439846
0.64	-0.232987	1.30253	-0.252995	-0.346557		0.64	-0.232987	-0.348674	-0.522647	-0.440731
0.641	-0.234895	1.30326	-0.2544	-0.347427		0.641	-0.234895	-0.349048	-0.525767	-0.44343
0.642	-0.235808	1.30299	-0.25515	-0.348398		0.642	-0.235808	-0.34972	-0.52778	-0.444699
0.642	-0.236204	1.30214	-0.258058	-0.349997		0.642	-0.236204	-0.35193	-0.528698	-0.44585
0.643	-0.237138	1.30109	-0.259387	-0.35154		0.643	-0.237138	-0.353774	-0.529839	-0.446089
0.644	-0.237961	1.30056	-0.260149	-0.352864		0.644	-0.237961	-0.354978	-0.530995	-0.446716
0.644	-0.238396	1.30031	-0.261708	-0.355613		0.644	-0.238396	-0.355768	-0.533258	-0.449816
0.645	-0.239517	1.30033	-0.26178	-0.356719		0.645	-0.239517	-0.355929	-0.5365	-0.449662
0.646	-0.239825	1.29893	-0.262765	-0.357509		0.646	-0.239825	-0.356342	-0.538497	-0.449393
0.646	-0.239739	1.29723	-0.26238	-0.357557		0.646	-0.239739	-0.357391	-0.540154	-0.45054
0.647	-0.238532	1.29539	-0.262215	-0.358742		0.647	-0.238532	-0.358894	-0.541075	-0.45193
0.648	-0.239321	1.29417	-0.261888	-0.358727		0.648	-0.239321	-0.359517	-0.542235	-0.453473
0.648	-0.240273	1.29303	-0.261888	-0.359138		0.648	-0.240273	-0.360504	-0.54324	-0.453825
0.649	-0.240522	1.29109	-0.261929	-0.360119		0.649	-0.240522	-0.361829	-0.544719	-0.453682
0.65	-0.24145	1.28985	-0.262423	-0.361308		0.65	-0.24145	-0.363446	-0.546427	-0.454438
0.65	-0.242397	1.28927	-0.263275	-0.361863		0.65	-0.242397	-0.364476	-0.54867	-0.455531
0.651	-0.24337	1.28805	-0.262742	-0.361618		0.651	-0.24337	-0.36556	-0.550156	-0.456249
0.652	-0.243618	1.28738	-0.262447	-0.361208		0.652	-0.243618	-0.367525	-0.551686	-0.457435
0.652	-0.244419	1.28655	-0.261976	-0.3612		0.652	-0.244419	-0.368866	-0.553717	-0.458727
0.653	-0.245202	1.28475	-0.261768	-0.362558		0.653	-0.245202	-0.370445	-0.555663	-0.458199
0.654	-0.244387	1.28282	-0.26109	-0.363689		0.653	-0.244387	-0.371909	-0.557811	-0.458563
0.654	-0.24378	1.28038	-0.26061	-0.364561		0.654	-0.24378	-0.373317	-0.559703	-0.458929
0.655	-0.244172	1.27826	-0.261058	-0.365544		0.655	-0.244172	-0.374025	-0.560187	-0.460502
0.656	-0.244024	1.27657	-0.260172	-0.366225		0.655	-0.244024	-0.374412	-0.561406	-0.46072
0.656	-0.244543	1.27609	-0.258408	-0.367899		0.656	-0.244543	-0.374727	-0.562913	-0.459587
0.657	-0.244373	1.27487	-0.257734	-0.36905		0.657	-0.244373	-0.375074	-0.564195	-0.459768
0.658	-0.244744	1.27237	-0.2573	-0.368908		0.657	-0.244744	-0.37569	-0.567176	-0.45986
0.658	-0.244604	1.26953	-0.257897	-0.369118		0.658	-0.244604	-0.377533	-0.568931	-0.459668
0.659	-0.244551	1.26869	-0.258242	-0.370252		0.659	-0.244551	-0.378522	-0.571198	-0.458578
0.66	-0.243983	1.26788	-0.257635	-0.372078		0.659	-0.243983	-0.379164	-0.573517	-0.457746
0.66	-0.243769	1.26684	-0.258002	-0.374388		0.66	-0.243769	-0.379657	-0.574576	-0.457678
0.661	-0.245203	1.26584	-0.258672	-0.375825		0.661	-0.245203	-0.380734	-0.575359	-0.45747
0.662	-0.247473	1.26494	-0.258243	-0.37644		0.661	-0.247473	-0.381445	-0.576704	-0.458174
0.662	-0.248916	1.26447	-0.259034	-0.377132		0.662	-0.248916	-0.382507	-0.577028	-0.458618
0.663	-0.249928	1.26363	-0.260183	-0.377348		0.663	-0.249928	-0.382796	-0.578356	-0.458417
0.664	-0.25096	1.26174	-0.259811	-0.37787		0.663	-0.25096	-0.383143	-0.579021	-0.458777
0.664	-0.252274	1.26001	-0.259788	-0.378982		0.664	-0.252274	-0.384282	-0.580766	-0.458665
0.665	-0.252989	1.25911	-0.259478	-0.37983		0.665	-0.252989	-0.384522	-0.582363	-0.457808
0.666	-0.251921	1.25843	-0.260107	-0.380233		0.665	-0.251921	-0.383688	-0.584327	-0.458096
0.666	-0.252017	1.2578	-0.260269	-0.380937		0.666	-0.252017	-0.384361	-0.586272	-0.458373
0.667	-0.253285	1.25677	-0.260452	-0.381598		0.667	-0.253285	-0.385974	-0.588022	-0.458198
0.668	-0.254431	1.25496	-0.26046	-0.382841		0.667	-0.254431	-0.387118	-0.589357	-0.45932
0.668	-0.255967	1.25389	-0.260983	-0.384418		0.668	-0.255967	-0.387254	-0.5912	-0.460544
0.669	-0.257319	1.25374	-0.261184	-0.38523		0.669	-0.257319	-0.3878	-0.593054	-0.460801
0.67	-0.25863	1.25359	-0.261227	-0.386248		0.669	-0.25863	-0.387981	-0.594979	-0.46067
0.67	-0.259638	1.25354	-0.261121	-0.387576		0.67	-0.259638	-0.389212	-0.595415	-0.460636
0.671	-0.261142	1.2532	-0.260925	-0.388032		0.671	-0.261142	-0.390223	-0.597296	-0.460465
0.672	-0.26268	1.25239	-0.261014	-0.388075		0.671	-0.26268	-0.390571	-0.597813	-0.460576
0.672	-0.26338	1.25146	-0.262238	-0.388239		0.672	-0.26338	-0.392327	-0.598737	-0.460673
0.673	-0.263815	1.24995	-0.263357	-0.387899		0.673	-0.263815	-0.392606	-0.598605	-0.461103
0.674	-0.264398	1.24854	-0.265546	-0.387875		0.673	-0.264398	-0.392853	-0.59787	-0.46176
0.674	-0.264555	1.24729	-0.248656	-0.388672		0.674	-0.264555	-0.394418	-0.598175	-0.461914
0.675	-0.265094	1.24602	-0.227822	-0.389498		0.675	-0.265094	-0.39557	-0.600333	-0.462106
0.676	-0.266119	1.24534	-0.210324	-0.390351		0.675	-0.266119	-0.394778	-0.600953	-0.462487
0.676	-0.266324	1.24441	-0.202063	-0.391097		0.676	-0.266324	-0.393813	-0.601932	-0.463618
0.677	-0.26618	1.24317	-0.201178	-0.391606		0.677	-0.26618	-0.394174	-0.602386	-0.465563
0.678	-0.266549	1.24224	-0.200634	-0.391743		0.677	-0.266549	-0.394825	-0.602714	-0.466387
0.678	-0.267299	1.24049	-0.201626	-0.39152		0.678	-0.267299	-0.396242	-0.602519	-0.467116
0.679	-0.268871	1.23966	-0.202484	-0.391789		0.679	-0.268871	-0.397292	-0.601801	-0.469519
0.68	-0.270494	1.23948	-0.20398	-0.392959		0.679	-0.270494	-0.397699	-0.601472	-0.471761
0.68	-0.271612	1.23909	-0.205149	-0.394336		0.68	-0.271612	-0.397348	-0.602739	-0.472278
0.681	-0.271364	1.23808	-0.206641	-0.395395		0.681	-0.271364	-0.398206	-0.60482	-0.473126
0.682	-0.271634	1.23723	-0.208948	-0.395976		0.681	-0.271634	-0.398776	-0.605412	-0.474787
0.682	-0.271496	1.23676	-0.210615	-0.397002		0.682	-0.271496	-0.399197	-0.6052	-0.476723
0.683	-0.272173	1.23498	-0.212439	-0.397935		0.683	-0.272173	-0.398323	-0.604896	-0.477637
0.684	-0.273608	1.23301	-0.213205	-0.399769		0.683	-0.273608	-0.398378	-0.604562	-0.477383
0.684	-0.274636	1.23156	-0.21551	-0.401971		0.684	-0.274636	-0.398564	-0.604344	-0.479038
0.685	-0.275332	1.22974	-0.217843	-0.403539		0.685	-0.275332	-0.398554	-0.604471	-0.480414
0.686	-0.275945	1.22766	-0.220211	-0.405055		0.685	-0.275945	-0.398254	-0.60457	-0.480697
0.686	-0.275623	1.22647	-0.222096	-0.405857		0.686	-0.275623	-0.398029	-0.604824	-0.481869
0.687	-0.27637	1.22498	-0.22504	-0.407083		0.687	-0.27637	-0.398367	-0.605773	-0.482589
0.688	-0.277253	1.22324	-0.227683	-0.407681		0.687	-0.277253	-0.398887	-0.606881	-0.483214
0.688	-0.277482	1.22259	-0.229613	-0.408169		0.688	-0.277482	-0.399461	-0.608748	-0.482151
0.689	-0.277899	1.22154	-0.230193	-0.408755		0.689	-0.277899	-0.400952	-0.610522	-0.483221
0.69	-0.277941	1.21971	-0.231922	-0.409033		0.689	-0.277941	-0.403317	-0.611691	-0.48425
0.69	-0.277553	1.21804	-0.233445	-0.410383		0.69	-0.277553	-0.40393	-0.612681	-0.484444
0.691	-0.277944	1.21682	-0.235402	-0.41265		0.691	-0.277944	-0.404814	-0.612595	-0.486086
0.692	-0.278639	1.2168	-0.237393	-0.413888		0.691	-0.278639	-0.404679	-0.612121	-0.487409
0.692	-0.280245	1.21634	-0.238209	-0.414248		0.692	-0.280245	-0.405232	-0.613256	-0.489866
0.693	-0.281743	1.2152	-0.240691	-0.414598		0.693	-0.281743	-0.405762	-0.613366	-0.491814
0.694	-0.282779	1.21461	-0.242657	-0.415856		0.693	-0.282779	-0.407214	-0.614116	-0.492796
0.694	-0.283308	1.21445	-0.244347	-0.417173		0.694	-0.283308	-0.408069	-0.615048	-0.494355
0.695	-0.283326	1.21444	-0.245452	-0.418867		0.695	-0.283326	-0.408955	-0.615954	-0.495082
0.696	-0.284163	1.21362	-0.247064	-0.420662		0.695	-0.284163	-0.40846	-0.61763	-0.496474
0.696	-0.285332	1.21282	-0.247071	-0.422328		0.696	-0.285332	-0.408803	-0.619014	-0.496034
0.697	-0.287359	1.21206	-0.248806	-0.424051		0.697	-0.287359	-0.409113	-0.620108	-0.496277
0.697	-0.289726	1.21124	-0.2501	-0.426212		0.697	-0.289726	-0.408765	-0.620026	-0.497069
0.698	-0.29165	1.21103	-0.2509	-0.427852		0.698	-0.29165	-0.408544	-0.620375	-0.498008
0.699	-0.294984	1.21058	-0.251632	-0.428759		0.699	-0.294984	-0.409278	-0.620068	-0.497329
0.699	-0.296105	1.2104	-0.252586	-0.429681		0.699	-0.296105	-0.40947	-0.621025	-0.498745
0.7	-0.29645	1.21024	-0.252775	-0.431223		0.7	-0.29645	-0.409546	-0.621812	-0.499549
0.701	-0.298916	1.21065	-0.252909	-0.432177		0.701	-0.298916	-0.409662	-0.622078	-0.499752
0.701	-0.30003	1.21114	-0.254123	-0.432556		0.701	-0.30003	-0.41004	-0.623082	-0.499926
0.702	-0.300828	1.21063	-0.255358	-0.432863		0.702	-0.300828	-0.410947	-0.623635	-0.501483
0.703	-0.301938	1.21012	-0.256772	-0.432784		0.703	-0.301938	-0.411302	-0.622794	-0.502592
0.703	-0.302708	1.20967	-0.257918	-0.43193		0.703	-0.302708	-0.41113	-0.622661	-0.503363
0.704	-0.303087	1.20906	-0.25976	-0.431786		0.704	-0.303087	-0.411409	-0.622264	-0.505461
0.705	-0.304038	1.20864	-0.260442	-0.432891		0.705	-0.304038	-0.412449	-0.622036	-0.505625
0.705	-0.30429	1.20893	-0.259929	-0.433724		0.705	-0.30429	-0.41295	-0.6223	-0.506299
0.706	-0.304353	1.20955	-0.259607	-0.433578		0.706	-0.304353	-0.413428	-0.623262	-0.507171
0.707	-0.304469	1.20941	-0.259219	-0.433181		0.707	-0.304469	-0.413741	-0.623788	-0.508382
0.707	-0.304813	1.20932	-0.279827	-0.433328		0.707	-0.304813	-0.414024	-0.623687	-0.508365
0.708	-0.304966	1.20945	-0.301424	-0.433511		0.708	-0.304966	-0.414228	-0.622853	-0.509242
0.709	-0.30419	1.20929	-0.318522	-0.433088		0.709	-0.30419	-0.414668	-0.622915	-0.509784
0.709	-0.304045	1.20906	-0.326064	-0.432996		0.709	-0.304045	-0.415091	-0.623561	-0.510564
0.71	-0.304571	1.20843	-0.326886	-0.433189		0.71	-0.304571	-0.41487	-0.624556	-0.511375
0.711	-0.304512	1.20838	-0.328968	-0.432945		0.711	-0.304512	-0.415299	-0.625323	-0.511635
0.711	-0.304918	1.20918	-0.329792	-0.431928		0.711	-0.304918	-0.414942	-0.626372	-0.512383
0.712	-0.305264	1.20984	-0.330647	-0.431254		0.712	-0.305264	-0.414479	-0.628126	-0.512485
0.713	-0.305644	1.21009	-0.332039	-0.430696		0.713	-0.305644	-0.414796	-0.630203	-0.511534
0.713	-0.306223	1.20953	-0.332867	-0.429851		0.713	-0.306223	-0.415178	-0.631544	-0.511584
0.714	-0.306848	1.20863	-0.332151	-0.428138		0.714	-0.306848	-0.41521	-0.631666	-0.512185
0.715	-0.30686	1.20896	-0.332725	-0.427114		0.715	-0.30686	-0.414758	-0.633826	-0.512024
0.715	-0.307539	1.20855	-0.334708	-0.426314		0.715	-0.307539	-0.414435	-0.63646	-0.512328
0.716	-0.307671	1.20914	-0.33699	-0.426192		0.716	-0.307671	-0.415309	-0.63789	-0.513925
0.717	-0.306536	1.20986	-0.338288	-0.426178		0.717	-0.306536	-0.416959	-0.640561	-0.516181
0.717	-0.30623	1.20958	-0.338796	-0.425495		0.717	-0.30623	-0.418075	-0.642881	-0.517732
0.718	-0.305892	1.20935	-0.339086	-0.424764		0.718	-0.305892	-0.418445	-0.644418	-0.518111
0.719	-0.305543	1.20812	-0.338631	-0.424599		0.719	-0.305543	-0.418776	-0.646113	-0.51888
0.719	-0.305187	1.20651	-0.340128	-0.424483		0.719	-0.305187	-0.419042	-0.646903	-0.519468
0.72	-0.305417	1.20563	-0.33983	-0.423983		0.72	-0.305417	-0.419411	-0.648148	-0.520466
0.721	-0.305648	1.20609	-0.340276	-0.424084		0.721	-0.305648	-0.420449	-0.649218	-0.521112
0.721	-0.307068	1.20558	-0.340405	-0.424802		0.721	-0.307068	-0.421243	-0.649165	-0.52242
0.722	-0.308519	1.20421	-0.342121	-0.425109		0.722	-0.308519	-0.421241	-0.649231	-0.523887
0.723	-0.309299	1.20426	-0.344997	-0.425671		0.723	-0.309299	-0.421045	-0.650702	-0.525539
0.723	-0.310681	1.20349	-0.345981	-0.425643		0.723	-0.310681	-0.421851	-0.651323	-0.527122
0.724	-0.311232	1.20321	-0.346574	-0.424526		0.724	-0.311232	-0.422119	-0.65268	-0.527895
0.725	-0.311968	1.20293	-0.346809	-0.423825		0.725	-0.311968	-0.422811	-0.653955	-0.528529
0.725	-0.311788	1.20213	-0.347776	-0.424392		0.725	-0.311788	-0.423355	-0.654371	-0.528555
0.726	-0.311454	1.20154	-0.348872	-0.424649		0.726	-0.311454	-0.423775	-0.654551	-0.528781
0.727	-0.311157	1.20116	-0.349589	-0.423586		0.727	-0.311157	-0.424298	-0.655649	-0.52993
0.727	-0.311607	1.19985	-0.351961	-0.42202		0.727	-0.311607	-0.424498	-0.656821	-0.530505
0.728	-0.311645	1.19887	-0.353773	-0.421888		0.728	-0.311645	-0.424627	-0.657143	-0.531162
0.729	-0.310463	1.1981	-0.354632	-0.421753		0.729	-0.310463	-0.425805	-0.657624	-0.531507
0.729	-0.308477	1.19727	-0.356856	-0.42193		0.729	-0.308477	-0.426895	-0.658382	-0.532328
0.73	-0.306709	1.19645	-0.358924	-0.421525		0.73	-0.306709	-0.427553	-0.659286	-0.533188
0.731	-0.305753	1.19622	-0.361146	-0.420845		0.731	-0.305753	-0.427922	-0.661079	-0.534144
0.731	-0.305204	1.1956	-0.364121	-0.420823		0.731	-0.305204	-0.42937	-0.662853	-0.53494
0.732	-0.303221	1.19472	-0.365702	-0.421428		0.732	-0.303221	-0.431164	-0.66427	-0.535412
0.733	-0.303202	1.19384	-0.366677	-0.421945		0.733	-0.303202	-0.432808	-0.665401	-0.535765
0.733	-0.304226	1.19284	-0.36796	-0.421386		0.733	-0.304226	-0.433321	-0.666448	-0.536368
0.734	-0.304148	1.19209	-0.368217	-0.420523		0.734	-0.304148	-0.434277	-0.668576	-0.536606
0.735	-0.304324	1.19022	-0.368602	-0.420514		0.735	-0.304324	-0.434985	-0.670218	-0.537707
0.735	-0.305017	1.18882	-0.368967	-0.420005		0.735	-0.305017	-0.434855	-0.671015	-0.538285
0.736	-0.306012	1.18836	-0.369684	-0.420324		0.736	-0.306012	-0.435428	-0.672637	-0.538489
0.737	-0.307391	1.18807	-0.370655	-0.421584		0.737	-0.307391	-0.436399	-0.675029	-0.539654
0.737	-0.307543	1.18849	-0.371302	-0.421757		0.737	-0.307543	-0.436828	-0.676879	-0.539837
0.738	-0.307057	1.18883	-0.371638	-0.421623		0.738	-0.307057	-0.437125	-0.678532	-0.540832
0.739	-0.307352	1.18815	-0.372411	-0.42148		0.739	-0.307352	-0.438008	-0.680137	-0.541106
0.739	-0.308391	1.18728	-0.373202	-0.422289		0.739	-0.308391	-0.438701	-0.681498	-0.540614
0.74	-0.309341	1.18682	-0.373074	-0.422712		0.74	-0.309341	-0.439698	-0.683801	-0.54035
0.741	-0.309978	1.18571	-0.372995	-0.4224		0.741	-0.309978	-0.440134	-0.686256	-0.541481
0.741	-0.311443	1.18445	-0.374007	-0.422021		0.741	-0.311443	-0.440576	-0.688892	-0.541381
0.742	-0.312941	1.18349	-0.37457	-0.421416		0.742	-0.312941	-0.44176	-0.691648	-0.541623
0.743	-0.313602	1.18306	-0.375107	-0.421074		0.743	-0.313602	-0.443109	-0.693148	-0.541029
0.743	-0.313612	1.18207	-0.375921	-0.420729		0.743	-0.313612	-0.443744	-0.694727	-0.539927
0.744	-0.314782	1.18059	-0.376506	-0.421363		0.744	-0.314782	-0.443255	-0.696671	-0.53955
0.745	-0.315045	1.17938	-0.37718	-0.423031		0.745	-0.315045	-0.443751	-0.697907	-0.539936
0.745	-0.314871	1.17839	-0.377095	-0.42477		0.745	-0.314871	-0.44461	-0.699136	-0.539239
0.746	-0.315075	1.17721	-0.376866	-0.42551		0.746	-0.315075	-0.445537	-0.700022	-0.538976
0.747	-0.314942	1.1765	-0.376353	-0.426586		0.747	-0.314942	-0.44546	-0.701276	-0.538848
0.747	-0.315595	1.17614	-0.377752	-0.428488		0.747	-0.315595	-0.445029	-0.703045	-0.537992
0.748	-0.31532	1.17507	-0.378437	-0.429424		0.748	-0.31532	-0.444765	-0.704805	-0.536885
0.749	-0.315795	1.1742	-0.37847	-0.429067		0.749	-0.315795	-0.445001	-0.705991	-0.535942
0.749	-0.316016	1.17398	-0.378125	-0.428765		0.749	-0.316016	-0.444431	-0.707018	-0.534684
0.75	-0.316298	1.17297	-0.378734	-0.428851		0.75	-0.316298	-0.443625	-0.706612	-0.533626
0.751	-0.315873	1.17195	-0.378831	-0.42957		0.751	-0.315873	-0.443025	-0.706112	-0.533188
0.751	-0.317457	1.17217	-0.377754	-0.430704		0.751	-0.317457	-0.442906	-0.706732	-0.532885
0.752	-0.318309	1.17378	-0.378565	-0.430968		0.752	-0.318309	-0.443675	-0.707084	-0.533199
0.753	-0.319119	1.17505	-0.378179	-0.431488		0.753	-0.319119	-0.444777	-0.708054	-0.533411
0.753	-0.319211	1.17548	-0.379063	-0.432163		0.753	-0.319211	-0.445295	-0.709697	-0.532884
0.754	-0.320015	1.17515	-0.380036	-0.432158		0.754	-0.320015	-0.445114	-0.710569	-0.533301
0.755	-0.319944	1.17494	-0.381296	-0.431947		0.755	-0.319944	-0.444982	-0.711102	-0.53298
0.755	-0.319987	1.17498	-0.381801	-0.431819		0.755	-0.319987	-0.445908	-0.711837	-0.532109
0.756	-0.319269	1.17521	-0.381929	-0.431456		0.756	-0.319269	-0.447252	-0.711257	-0.531527
0.757	-0.319376	1.17674	-0.38351	-0.430688		0.757	-0.319376	-0.448228	-0.711199	-0.531121
0.757	-0.31886	1.17822	-0.384832	-0.430683		0.757	-0.31886	-0.449599	-0.711253	-0.531811
0.758	-0.318041	1.17891	-0.385846	-0.431019		0.758	-0.318041	-0.451138	-0.711723	-0.532124
0.759	-0.318451	1.17897	-0.38592	-0.430585		0.759	-0.318451	-0.451934	-0.712624	-0.532807
0.759	-0.319643	1.17885	-0.386223	-0.430625		0.759	-0.319643	-0.452967	-0.713769	-0.53339
0.76	-0.319749	1.17957	-0.386921	-0.430868		0.76	-0.319749	-0.453167	-0.71428	-0.533398
0.761	-0.319785	1.18037	-0.385489	-0.431816		0.761	-0.319785	-0.452962	-0.714211	-0.532938
0.761	-0.320691	1.18026	-0.386467	-0.43098		0.761	-0.320691	-0.453441	-0.714294	-0.532521
0.762	-0.321231	1.18077	-0.387213	-0.430603		0.762	-0.321231	-0.454471	-0.714722	-0.532359
0.763	-0.324602	1.18163	-0.387188	-0.430816		0.763	-0.324602	-0.455941	-0.714831	-0.533009
0.763	-0.325398	1.1815	-0.386221	-0.430916		0.763	-0.325398	-0.457523	-0.714473	-0.534098
0.764	-0.325494	1.18052	-0.386017	-0.431278		0.764	-0.325494	-0.459309	-0.714349	-0.533933
0.765	-0.325944	1.18011	-0.386177	-0.431247		0.765	-0.325944	-0.460256	-0.713678	-0.533637
0.765	-0.328437	1.17989	-0.38657	-0.431785		0.765	-0.328437	-0.460277	-0.713006	-0.533771
0.766	-0.329805	1.17946	-0.387366	-0.432123		0.766	-0.329805	-0.460482	-0.712597	-0.533283
0.767	-0.331836	1.17984	-0.388663	-0.432926		0.767	-0.331836	-0.461192	-0.712493	-0.533271
0.767	-0.333	1.18005	-0.390656	-0.434566		0.767	-0.333	-0.461481	-0.713012	-0.533131
0.768	-0.333558	1.17986	-0.391851	-0.435345		0.768	-0.333558	-0.461041	-0.713096	-0.532144
0.769	-0.333439	1.17996	-0.392588	-0.436178		0.769	-0.333439	-0.461008	-0.713631	-0.531612
0.769	-0.333016	1.17989	-0.392767	-0.436779		0.769	-0.333016	-0.461373	-0.714888	-0.531734
0.77	-0.331942	1.17978	-0.394466	-0.435526		0.77	-0.331942	-0.46179	-0.714718	-0.531847
0.771	-0.332409	1.17954	-0.394978	-0.435691		0.771	-0.332409	-0.461835	-0.714298	-0.531689
0.771	-0.33311	1.17851	-0.39597	-0.434815		0.771	-0.33311	-0.461699	-0.714365	-0.53137
0.772	-0.333787	1.17884	-0.397078	-0.434565		0.772	-0.333787	-0.461661	-0.715447	-0.531443
0.773	-0.334248	1.17852	-0.399297	-0.434938		0.773	-0.334248	-0.461469	-0.716682	-0.531877
0.773	-0.333979	1.17866	-0.401476	-0.43502		0.773	-0.333979	-0.461343	-0.716816	-0.532447
0.774	-0.334388	1.17894	-0.403348	-0.435413		0.774	-0.334388	-0.461258	-0.717424	-0.532949
0.775	-0.334224	1.17934	-0.404359	-0.436025		0.775	-0.334224	-0.461365	-0.717095	-0.533465
0.775	-0.334942	1.17985	-0.405426	-0.437488		0.775	-0.334942	-0.461532	-0.716472	-0.534358
0.776	-0.336339	1.17946	-0.40715	-0.438779		0.776	-0.336339	-0.461659	-0.716258	-0.535118
0.777	-0.338091	1.18042	-0.408763	-0.439919		0.777	-0.338091	-0.462544	-0.716143	-0.536663
0.777	-0.338849	1.18176	-0.409874	-0.44086		0.777	-0.338849	-0.464005	-0.716826	-0.53803
0.778	-0.339939	1.18204	-0.410528	-0.441497		0.778	-0.339939	-0.464811	-0.718051	-0.539046
0.779	-0.341942	1.18267	-0.411363	-0.442379		0.779	-0.341942	-0.46525	-0.718325	-0.541206
0.779	-0.344263	1.18222	-0.413128	-0.442271		0.779	-0.344263	-0.465437	-0.71901	-0.542875
0.78	-0.346472	1.18283	-0.414716	-0.442735		0.78	-0.346472	-0.466264	-0.718778	-0.54351
0.781	-0.347981	1.18326	-0.415709	-0.443156		0.781	-0.347981	-0.468181	-0.717999	-0.544712
0.781	-0.349595	1.18267	-0.416767	-0.443681		0.781	-0.349595	-0.470061	-0.717182	-0.546822
0.782	-0.350244	1.18255	-0.417579	-0.444412		0.782	-0.350244	-0.471266	-0.717011	-0.548284
0.783	-0.35125	1.18052	-0.41813	-0.444708		0.783	-0.35125	-0.472832	-0.71769	-0.548254
0.783	-0.352159	1.17948	-0.418205	-0.443829		0.783	-0.352159	-0.474498	-0.718685	-0.54852
0.784	-0.353455	1.1789	-0.418478	-0.443917		0.784	-0.353455	-0.475122	-0.719201	-0.549068
0.785	-0.35411	1.1783	-0.419798	-0.443246		0.785	-0.35411	-0.47571	-0.719027	-0.549975
0.785	-0.354653	1.1771	-0.420901	-0.442587		0.785	-0.354653	-0.476028	-0.719431	-0.551526
0.786	-0.355277	1.17689	-0.42213	-0.441867		0.786	-0.355277	-0.475855	-0.720163	-0.552387
0.787	-0.356051	1.1766	-0.422839	-0.441351		0.787	-0.356051	-0.476566	-0.719866	-0.552236
0.787	-0.355598	1.17675	-0.423277	-0.440987		0.787	-0.355598	-0.478023	-0.71997	-0.552389
0.788	-0.355542	1.1762	-0.423352	-0.441362		0.788	-0.355542	-0.478996	-0.721134	-0.552879
0.789	-0.355961	1.17554	-0.423345	-0.442835		0.789	-0.355961	-0.47937	-0.722195	-0.553188
0.789	-0.356898	1.17459	-0.424501	-0.443737		0.789	-0.356898	-0.479283	-0.723079	-0.554454
0.79	-0.357233	1.17249	-0.425878	-0.444759		0.79	-0.357233	-0.478808	-0.724283	-0.556046
0.791	-0.359233	1.17015	-0.426372	-0.446062		0.791	-0.359233	-0.47869	-0.725351	-0.556785
0.791	-0.359998	1.16808	-0.42645	-0.447244		0.791	-0.359998	-0.478778	-0.726346	-0.557244
0.792	-0.360364	1.16636	-0.427264	-0.448587		0.792	-0.360364	-0.478827	-0.726337	-0.558094
0.793	-0.360081	1.16508	-0.427744	-0.449815		0.793	-0.360081	-0.478745	-0.727524	-0.558123
0.793	-0.36081	1.16415	-0.428001	-0.450799		0.793	-0.36081	-0.479429	-0.728381	-0.557867
0.794	-0.361375	1.16301	-0.42884	-0.451698		0.794	-0.361375	-0.480612	-0.729012	-0.558671
0.795	-0.361667	1.16145	-0.428958	-0.452727		0.795	-0.361667	-0.481098	-0.730935	-0.559441
0.795	-0.361711	1.16084	-0.429304	-0.452907		0.795	-0.361711	-0.480326	-0.732054	-0.559642
0.796	-0.361103	1.15967	-0.430952	-0.452355		0.796	-0.361103	-0.478692	-0.732767	-0.55894
0.797	-0.36149	1.15894	-0.43253	-0.452446		0.797	-0.36149	-0.477212	-0.733959	-0.55886
0.797	-0.361368	1.15816	-0.433058	-0.452632		0.797	-0.361368	-0.476656	-0.735324	-0.559671
0.798	-0.360649	1.15756	-0.432759	-0.452619		0.798	-0.360649	-0.476764	-0.736518	-0.560687
0.799	-0.360267	1.15668	-0.433118	-0.452084		0.799	-0.360267	-0.476886	-0.737877	-0.56246
0.799	-0.360158	1.15579	-0.433456	-0.451658		0.799	-0.360158	-0.476998	-0.739167	-0.563212
0.8	-0.35901	1.15372	-0.433186	-0.451111		0.8	-0.35901	-0.477009	-0.739927	-0.563155
0.801	-0.358488	1.15211	-0.43286	-0.45061		0.801	-0.358488	-0.477268	-0.739787	-0.564441
0.801	-0.35777	1.15205	-0.432497	-0.449681		0.801	-0.35777	-0.478404	-0.739712	-0.565978
0.802	-0.357949	1.15159	-0.432258	-0.449264		0.802	-0.357949	-0.479733	-0.740482	-0.566802
0.803	-0.357683	1.14993	-0.432199	-0.449942		0.803	-0.357683	-0.480815	-0.740737	-0.567807
0.803	-0.356939	1.14791	-0.431269	-0.450366		0.803	-0.356939	-0.481792	-0.741553	-0.569583
0.804	-0.356105	1.14574	-0.43089	-0.45117		0.804	-0.356105	-0.482788	-0.743532	-0.5719
0.805	-0.356297	1.14434	-0.431378	-0.45272		0.805	-0.356297	-0.483887	-0.744415	-0.572979
0.805	-0.3568	1.14318	-0.430877	-0.453435		0.805	-0.3568	-0.485067	-0.744231	-0.572921
0.806	-0.356764	1.14289	-0.429359	-0.453999		0.806	-0.356764	-0.486555	-0.744132	-0.57326
0.807	-0.357448	1.14176	-0.428323	-0.454517		0.807	-0.357448	-0.48787	-0.745293	-0.574535
0.807	-0.357619	1.14065	-0.427737	-0.455768		0.807	-0.357619	-0.489973	-0.746692	-0.57567
0.808	-0.356754	1.13939	-0.427599	-0.457087		0.808	-0.356754	-0.492134	-0.748235	-0.575968
0.809	-0.355501	1.13804	-0.428321	-0.457838		0.809	-0.355501	-0.494054	-0.74959	-0.576537
0.809	-0.354132	1.13715	-0.428743	-0.457929		0.809	-0.354132	-0.495628	-0.750654	-0.576975
0.81	-0.352945	1.13592	-0.428548	-0.458846		0.81	-0.352945	-0.496928	-0.752028	-0.577203
0.811	-0.352418	1.13353	-0.42854	-0.459746		0.811	-0.352418	-0.497997	-0.752776	-0.578269
0.811	-0.351736	1.13103	-0.428926	-0.459887		0.811	-0.351736	-0.49952	-0.753544	-0.57811
0.812	-0.350105	1.12918	-0.429672	-0.459834		0.812	-0.350105	-0.501216	-0.754613	-0.57735
0.813	-0.347559	1.12839	-0.429021	-0.461509		0.813	-0.347559	-0.502038	-0.755502	-0.577848
0.813	-0.345725	1.12622	-0.428922	-0.46188		0.813	-0.345725	-0.503303	-0.756709	-0.578814
0.814	-0.343973	1.12383	-0.429902	-0.462186		0.814	-0.343973	-0.504203	-0.758315	-0.579835
0.815	-0.343426	1.12253	-0.430727	-0.462308		0.815	-0.343426	-0.504374	-0.759689	-0.580724
0.815	-0.343826	1.12112	-0.432025	-0.463862		0.815	-0.343826	-0.504564	-0.760516	-0.581893
0.816	-0.343861	1.12076	-0.433314	-0.465713		0.816	-0.343861	-0.505314	-0.760962	-0.584213
0.817	-0.344303	1.12021	-0.433887	-0.468733		0.817	-0.344303	-0.505788	-0.762473	-0.586446
0.817	-0.344351	1.11912	-0.434214	-0.470792		0.817	-0.344351	-0.506668	-0.764418	-0.588711
0.818	-0.344909	1.11786	-0.434034	-0.473457		0.818	-0.344909	-0.508335	-0.765702	-0.590199
0.819	-0.345384	1.11684	-0.433677	-0.47595		0.819	-0.345384	-0.510493	-0.767229	-0.59136
0.819	-0.345356	1.11468	-0.43295	-0.479159		0.819	-0.345356	-0.512206	-0.768842	-0.592638
0.82	-0.345828	1.11282	-0.432926	-0.480359		0.82	-0.345828	-0.512988	-0.770101	-0.594447
0.821	-0.34722	1.11068	-0.43298	-0.481735		0.821	-0.34722	-0.512859	-0.77103	-0.596045
0.821	-0.348217	1.11021	-0.433445	-0.483426		0.821	-0.348217	-0.512147	-0.771713	-0.59699
0.822	-0.348064	1.10983	-0.433047	-0.484079		0.822	-0.348064	-0.511961	-0.77186	-0.598622
0.823	-0.34839	1.11025	-0.431565	-0.485803		0.823	-0.34839	-0.511712	-0.772275	-0.599262
0.823	-0.349019	1.11092	-0.430931	-0.487469		0.823	-0.349019	-0.511436	-0.773496	-0.598183
0.824	-0.348188	1.11094	-0.431098	-0.487265		0.824	-0.348188	-0.511673	-0.774459	-0.598305
0.825	-0.348625	1.10994	-0.431246	-0.487983		0.825	-0.348625	-0.512077	-0.775386	-0.599052
0.825	-0.348811	1.1097	-0.431721	-0.487958		0.825	-0.348811	-0.5125	-0.776504	-0.5993
0.826	-0.349469	1.11079	-0.43249	-0.487948		0.826	-0.349469	-0.5126	-0.77731	-0.599902
0.827	-0.349072	1.11016	-0.433287	-0.488889		0.827	-0.349072	-0.512466	-0.778909	-0.60127
0.827	-0.34879	1.10849	-0.434162	-0.489682		0.827	-0.34879	-0.512713	-0.780401	-0.601993
0.828	-0.347703	1.10881	-0.435167	-0.490935		0.828	-0.347703	-0.513348	-0.780487	-0.603309
0.829	-0.348642	1.10813	-0.43566	-0.491678		0.829	-0.348642	-0.514104	-0.780948	-0.604521
0.829	-0.34942	1.10719	-0.435097	-0.493075		0.829	-0.34942	-0.514962	-0.781723	-0.606396
0.83	-0.349931	1.10729	-0.434337	-0.494455		0.83	-0.349931	-0.516589	-0.781759	-0.609106
0.831	-0.349695	1.10757	-0.434349	-0.496132		0.831	-0.349695	-0.517571	-0.781539	-0.611163
0.831	-0.349928	1.1073	-0.434399	-0.49683		0.831	-0.349928	-0.518051	-0.781587	-0.612161
0.832	-0.349753	1.10711	-0.433548	-0.496509		0.832	-0.349753	-0.51868	-0.781504	-0.612492
0.833	-0.349846	1.10709	-0.433393	-0.49648		0.833	-0.349846	-0.519104	-0.78144	-0.613815
0.833	-0.348938	1.10706	-0.43371	-0.496565		0.833	-0.348938	-0.51846	-0.781562	-0.616076
0.834	-0.348969	1.10753	-0.434172	-0.496205		0.834	-0.348969	-0.518181	-0.781328	-0.617449
0.835	-0.348927	1.10634	-0.434742	-0.496426		0.835	-0.348927	-0.5181	-0.781782	-0.61817
0.835	-0.34965	1.10563	-0.434804	-0.497804		0.835	-0.34965	-0.518182	-0.782202	-0.61927
0.836	-0.350065	1.10573	-0.435278	-0.497758		0.836	-0.350065	-0.518115	-0.782304	-0.620212
0.837	-0.350595	1.10631	-0.43645	-0.498146		0.837	-0.350595	-0.517521	-0.782473	-0.62052
0.837	-0.351955	1.10746	-0.437301	-0.499538		0.837	-0.351955	-0.517402	-0.781744	-0.619701
0.838	-0.352791	1.10725	-0.437442	-0.499492		0.838	-0.352791	-0.517144	-0.780693	-0.619273
0.839	-0.351735	1.10679	-0.437766	-0.499667		0.838	-0.351735	-0.516733	-0.78113	-0.620619
0.839	-0.352882	1.10602	-0.43996	-0.499775		0.839	-0.352882	-0.516414	-0.781369	-0.622739
0.84	-0.353288	1.10552	-0.44185	-0.501037		0.84	-0.353288	-0.516481	-0.7814	-0.623972
0.841	-0.354249	1.10569	-0.442921	-0.50239		0.84	-0.354249	-0.515948	-0.779916	-0.624813
0.841	-0.356518	1.10516	-0.444517	-0.502608		0.841	-0.356518	-0.515147	-0.777875	-0.626484
0.842	-0.357632	1.10537	-0.445029	-0.503009		0.842	-0.357632	-0.51443	-0.776986	-0.62799
0.843	-0.358859	1.10587	-0.444439	-0.503162		0.842	-0.358859	-0.51389	-0.776119	-0.629538
0.843	-0.359803	1.10652	-0.444758	-0.503745		0.843	-0.359803	-0.51384	-0.775859	-0.63086
0.844	-0.359803	1.10687	-0.445528	-0.503332		0.844	-0.359803	-0.513469	-0.776076	-0.630177
0.845	-0.361331	1.10834	-0.446685	-0.503807		0.844	-0.361331	-0.51303	-0.775226	-0.630376
0.845	-0.362416	1.10928	-0.447264	-0.504153		0.845	-0.362416	-0.512575	-0.774456	-0.630957
0.846	-0.363774	1.10878	-0.447719	-0.503641		0.846	-0.363774	-0.511978	-0.774352	-0.63131
0.847	-0.364491	1.1087	-0.448711	-0.50388		0.846	-0.364491	-0.510977	-0.77306	-0.632382
0.847	-0.365693	1.10942	-0.448811	-0.50427		0.847	-0.365693	-0.509834	-0.771622	-0.632731
0.848	-0.366231	1.10946	-0.448529	-0.504613		0.848	-0.366231	-0.509137	-0.771431	-0.632074
0.849	-0.365387	1.11013	-0.447866	-0.505412		0.848	-0.365387	-0.508452	-0.771456	-0.631544
0.849	-0.364989	1.11165	-0.447093	-0.505718		0.849	-0.364989	-0.507418	-0.771052	-0.630764
0.85	-0.364702	1.11218	-0.44742	-0.504851		0.85	-0.364702	-0.505998	-0.770187	-0.629677
0.851	-0.365096	1.1138	-0.448437	-0.503403		0.85	-0.365096	-0.504562	-0.769317	-0.628379
0.851	-0.365177	1.11458	-0.44922	-0.502127		0.851	-0.365177	-0.503492	-0.769013	-0.627636
0.852	-0.36489	1.11384	-0.45001	-0.500707		0.852	-0.36489	-0.501538	-0.768613	-0.627029
0.853	-0.364161	1.11418	-0.451144	-0.498555		0.852	-0.364161	-0.500117	-0.767581	-0.625945
0.853	-0.36323	1.11374	-0.452571	-0.498387		0.853	-0.36323	-0.499154	-0.76725	-0.626193
0.854	-0.362529	1.11284	-0.453625	-0.498103		0.854	-0.362529	-0.498235	-0.76619	-0.626816
0.855	-0.362247	1.11269	-0.453688	-0.497321		0.854	-0.362247	-0.498003	-0.765928	-0.627158
0.855	-0.362476	1.11112	-0.453824	-0.497		0.855	-0.362476	-0.497183	-0.76711	-0.62741
0.856	-0.362018	1.10956	-0.454286	-0.49684		0.856	-0.362018	-0.496595	-0.768199	-0.628044
0.857	-0.361211	1.10858	-0.45457	-0.49765		0.856	-0.361211	-0.496828	-0.767707	-0.628948
0.857	-0.361225	1.10861	-0.45415	-0.499065		0.857	-0.361225	-0.497145	-0.767969	-0.628715
0.858	-0.361184	1.1094	-0.454248	-0.499248		0.858	-0.361184	-0.49719	-0.76735	-0.628214
0.859	-0.361216	1.10923	-0.455133	-0.498729		0.858	-0.361216	-0.496448	-0.766668	-0.62827
0.859	-0.361034	1.10879	-0.4554	-0.49844		0.859	-0.361034	-0.4973	-0.766122	-0.6286
0.86	-0.361512	1.10855	-0.455146	-0.49828		0.86	-0.361512	-0.498381	-0.764938	-0.628661
0.861	-0.362233	1.11005	-0.454416	-0.498121		0.86	-0.362233	-0.498616	-0.764655	-0.628973
0.861	-0.363596	1.10944	-0.453692	-0.497641		0.861	-0.363596	-0.498035	-0.764457	-0.629908
0.862	-0.363086	1.10909	-0.453583	-0.497493		0.862	-0.363086	-0.497471	-0.765514	-0.631477
0.863	-0.362881	1.10931	-0.45337	-0.497143		0.862	-0.362881	-0.498389	-0.766199	-0.632063
0.863	-0.362702	1.10867	-0.453804	-0.497559		0.863	-0.362702	-0.499313	-0.767036	-0.631889
0.864	-0.363676	1.10772	-0.454012	-0.496683		0.864	-0.363676	-0.499904	-0.768356	-0.63166
0.865	-0.36393	1.10675	-0.454381	-0.497084		0.864	-0.36393	-0.500886	-0.769831	-0.631997
0.865	-0.364151	1.10566	-0.455362	-0.498105		0.865	-0.364151	-0.500704	-0.770926	-0.632957
0.866	-0.364088	1.10535	-0.456272	-0.499381		0.866	-0.364088	-0.50032	-0.772305	-0.633388
0.867	-0.364656	1.10521	-0.456715	-0.50127		0.866	-0.364656	-0.501034	-0.773263	-0.633058
0.867	-0.3641	1.10541	-0.456817	-0.503182		0.867	-0.3641	-0.501414	-0.774622	-0.633104
0.868	-0.364077	1.10573	-0.456969	-0.5061		0.868	-0.364077	-0.501513	-0.776493	-0.633403
0.869	-0.364525	1.10498	-0.457669	-0.507923		0.868	-0.364525	-0.500887	-0.777694	-0.63391
0.869	-0.364153	1.1046	-0.458534	-0.50916		0.869	-0.364153	-0.501305	-0.779544	-0.634395
0.87	-0.364226	1.10398	-0.459245	-0.510766		0.87	-0.364226	-0.501126	-0.781216	-0.634304
0.871	-0.364168	1.10332	-0.459857	-0.511147		0.87	-0.364168	-0.50044	-0.783278	-0.63418
0.871	-0.364751	1.1038	-0.461124	-0.511125		0.871	-0.364751	-0.501996	-0.785824	-0.635459
0.872	-0.365925	1.10293	-0.462307	-0.512453		0.872	-0.365925	-0.501712	-0.787047	-0.635706
0.873	-0.365645	1.10227	-0.462747	-0.512628		0.872	-0.365645	-0.502229	-0.788324	-0.636073
0.873	-0.36495	1.10218	-0.463319	-0.511906		0.873	-0.36495	-0.502686	-0.788714	-0.63674
0.874	-0.364195	1.10225	-0.463151	-0.509882		0.874	-0.364195	-0.502762	-0.789015	-0.636199
0.875	-0.363896	1.10181	-0.463588	-0.511087		0.874	-0.363896	-0.503272	-0.78994	-0.635362
0.875	-0.3646	1.10154	-0.464996	-0.510219		0.875	-0.3646	-0.50344	-0.790711	-0.635354
0.876	-0.36501	1.10101	-0.464986	-0.510751		0.876	-0.36501	-0.504266	-0.792169	-0.635054
0.877	-0.364315	1.10084	-0.465075	-0.50916		0.876	-0.364315	-0.504449	-0.792872	-0.635218
0.877	-0.36416	1.10108	-0.465756	-0.510039		0.877	-0.36416	-0.505093	-0.793249	-0.636533
0.878	-0.363161	1.10167	-0.465336	-0.510649		0.878	-0.363161	-0.506999	-0.793967	-0.637631
0.879	-0.363259	1.1026	-0.465824	-0.510759		0.878	-0.363259	-0.508309	-0.793995	-0.639174
0.879	-0.363784	1.1031	-0.46666	-0.511536		0.879	-0.363784	-0.509652	-0.794113	-0.640631
0.88	-0.364316	1.10461	-0.46743	-0.512916		0.88	-0.364316	-0.510496	-0.795698	-0.640179
0.881	-0.364031	1.1065	-0.468089	-0.514404		0.88	-0.364031	-0.51225	-0.797998	-0.639651
0.881	-0.363684	1.107	-0.468073	-0.514446		0.881	-0.363684	-0.514375	-0.799831	-0.640532
0.882	-0.364443	1.10818	-0.468245	-0.513795		0.882	-0.364443	-0.516551	-0.801444	-0.640648
0.883	-0.364171	1.10785	-0.468954	-0.513401		0.882	-0.364171	-0.518024	-0.803154	-0.641813
0.883	-0.363517	1.10752	-0.469974	-0.513781		0.883	-0.363517	-0.51913	-0.804427	-0.643241
0.884	-0.363639	1.10669	-0.47038	-0.514349		0.884	-0.363639	-0.520671	-0.805105	-0.643375
0.885	-0.363248	1.10711	-0.470815	-0.513688		0.884	-0.363248	-0.520824	-0.806166	-0.644469
0.885	-0.363268	1.10789	-0.472035	-0.514083		0.885	-0.363268	-0.520853	-0.806987	-0.645285
0.886	-0.364554	1.10739	-0.471755	-0.514731		0.886	-0.364554	-0.522054	-0.807281	-0.646698
0.887	-0.366312	1.10834	-0.471524	-0.515902		0.886	-0.366312	-0.522983	-0.807569	-0.647423
0.887	-0.368424	1.10885	-0.471565	-0.516174		0.887	-0.368424	-0.523571	-0.809175	-0.647498
0.888	-0.368499	1.10807	-0.472278	-0.517819		0.888	-0.368499	-0.523805	-0.809921	-0.647911
0.889	-0.368574	1.10981	-0.473793	-0.518155		0.888	-0.368574	-0.524056	-0.809203	-0.648032
0.889	-0.369045	1.11087	-0.47572	-0.517522		0.889	-0.369045	-0.524286	-0.809063	-0.648404
0.89	-0.369463	1.11139	-0.477139	-0.517351		0.89	-0.369463	-0.5245	-0.810455	-0.648915
0.891	-0.370653	1.11034	-0.478579	-0.517833		0.89	-0.370653	-0.52403	-0.810757	-0.651474
0.891	-0.370685	1.1105	-0.48094	-0.518451		0.891	-0.370685	-0.523227	-0.812049	-0.653114
0.892	-0.370943	1.11068	-0.482269	-0.519409		0.892	-0.370943	-0.523506	-0.812981	-0.655055
0.893	-0.371772	1.11082	-0.482625	-0.521292		0.892	-0.371772	-0.521787	-0.812836	-0.656379
0.893	-0.371933	1.11133	-0.482996	-0.521391		0.893	-0.371933	-0.521204	-0.813406	-0.657502
0.894	-0.371747	1.10994	-0.483724	-0.521407		0.894	-0.371747	-0.520738	-0.81338	-0.659207
0.895	-0.370532	1.11043	-0.483659	-0.522014		0.894	-0.370532	-0.520617	-0.813735	-0.659482
0.895	-0.370319	1.11184	-0.484621	-0.523556		0.895	-0.370319	-0.520628	-0.812973	-0.659418
0.896	-0.369561	1.11138	-0.485947	-0.5246		0.896	-0.369561	-0.520153	-0.81133	-0.660179
0.896	-0.3688	1.11098	-0.487554	-0.524655		0.896	-0.3688	-0.519072	-0.811148	-0.66073
0.897	-0.368611	1.11238	-0.488352	-0.524178		0.897	-0.368611	-0.518901	-0.810039	-0.660995
0.898	-0.36925	1.11301	-0.489675	-0.523527		0.898	-0.36925	-0.517823	-0.80899	-0.662049
0.898	-0.370255	1.11501	-0.490559	-0.523996		0.898	-0.370255	-0.517682	-0.809102	-0.662849
0.899	-0.371293	1.1161	-0.491018	-0.523469		0.899	-0.371293	-0.518902	-0.809518	-0.662726
0.9	-0.372405	1.11604	-0.491516	-0.522197		0.9	-0.372405	-0.519887	-0.809274	-0.664507
0.9	-0.373333	1.11671	-0.492868	-0.522953		0.9	-0.373333	-0.521006	-0.810104	-0.665187
0.901	-0.373861	1.11814	-0.494119	-0.520191		0.901	-0.373861	-0.521977	-0.810357	-0.665212
0.902	-0.373834	1.11893	-0.495194	-0.51846		0.902	-0.373834	-0.522679	-0.809526	-0.665314
0.902	-0.374115	1.11938	-0.495842	-0.517825		0.902	-0.374115	-0.522083	-0.808215	-0.665953
0.903	-0.374732	1.11964	-0.496274	-0.517687		0.903	-0.374732	-0.522632	-0.806923	-0.666364
0.904	-0.374791	1.11987	-0.496624	-0.518355		0.904	-0.374791	-0.522366	-0.806878	-0.667125
0.904	-0.373678	1.11973	-0.49572	-0.518348		0.904	-0.373678	-0.52127	-0.806849	-0.668151
0.905	-0.372832	1.12051	-0.495264	-0.518054		0.905	-0.372832	-0.521206	-0.807009	-0.668755
0.906	-0.373468	1.1217	-0.495132	-0.518318		0.906	-0.373468	-0.520989	-0.807589	-0.669071
0.906	-0.374796	1.1221	-0.495158	-0.519636		0.906	-0.374796	-0.520551	-0.808024	-0.668354
0.907	-0.375732	1.12125	-0.495966	-0.520827		0.907	-0.375732	-0.520356	-0.809161	-0.667647
0.908	-0.375719	1.12088	-0.496321	-0.519798		0.908	-0.375719	-0.520077	-0.809848	-0.667695
0.908	-0.374977	1.12083	-0.495092	-0.52066		0.908	-0.374977	-0.519773	-0.811049	-0.667635
0.909	-0.374329	1.1203	-0.495432	-0.519709		0.909	-0.374329	-0.518859	-0.811454	-0.667197
0.91	-0.374442	1.11898	-0.496426	-0.519436		0.91	-0.374442	-0.51806	-0.811037	-0.666699
0.91	-0.375068	1.1184	-0.497028	-0.517994		0.91	-0.375068	-0.517834	-0.812222	-0.66691
0.911	-0.375891	1.11679	-0.498111	-0.516608		0.911	-0.375891	-0.515759	-0.813451	-0.66633
0.912	-0.376039	1.11506	-0.498987	-0.516407		0.912	-0.376039	-0.515225	-0.814245	-0.666551
0.912	-0.375559	1.1135	-0.498479	-0.514803		0.912	-0.375559	-0.514556	-0.81558	-0.666323
0.913	-0.375437	1.11154	-0.498505	-0.513073		0.913	-0.375437	-0.515378	-0.81481	-0.666228
0.914	-0.376003	1.10979	-0.498558	-0.511583		0.914	-0.376003	-0.514892	-0.814234	-0.666186
0.914	-0.376773	1.10882	-0.499154	-0.512256		0.914	-0.376773	-0.513593	-0.813913	-0.666756
0.915	-0.377469	1.10783	-0.49912	-0.51185		0.915	-0.377469	-0.51259	-0.81218	-0.667226
0.916	-0.378657	1.10756	-0.498357	-0.511724		0.916	-0.378657	-0.513099	-0.810754	-0.666629
0.916	-0.379593	1.10721	-0.497357	-0.511046		0.916	-0.379593	-0.51318	-0.809786	-0.667
0.917	-0.379157	1.10646	-0.496628	-0.51122		0.917	-0.379157	-0.513565	-0.809488	-0.668526
0.918	-0.379253	1.1054	-0.496001	-0.511843		0.918	-0.379253	-0.514854	-0.808731	-0.669024
0.918	-0.380114	1.10555	-0.494734	-0.512347		0.918	-0.380114	-0.515621	-0.807712	-0.668892
0.919	-0.380888	1.10579	-0.494603	-0.512533		0.919	-0.380888	-0.516352	-0.807488	-0.668044
0.92	-0.38126	1.10563	-0.494567	-0.511626		0.92	-0.38126	-0.516894	-0.807492	-0.667875
0.92	-0.381196	1.10576	-0.494043	-0.5104		0.92	-0.381196	-0.518071	-0.806465	-0.66805
0.921	-0.381213	1.10537	-0.492928	-0.50912		0.921	-0.381213	-0.519012	-0.805846	-0.667877
0.922	-0.381276	1.10535	-0.491666	-0.508804		0.922	-0.381276	-0.520212	-0.80611	-0.667989
0.922	-0.382399	1.10556	-0.489789	-0.508359		0.922	-0.382399	-0.522924	-0.806368	-0.668195
0.923	-0.384041	1.10556	-0.488502	-0.507774		0.923	-0.384041	-0.524158	-0.805457	-0.668735
0.924	-0.384266	1.10671	-0.488127	-0.506027		0.924	-0.384266	-0.525222	-0.804756	-0.668284
0.924	-0.384355	1.10698	-0.487142	-0.504607		0.924	-0.384355	-0.526519	-0.804222	-0.668214
0.925	-0.384762	1.1073	-0.485539	-0.503774		0.925	-0.384762	-0.526685	-0.804833	-0.667833
0.926	-0.385398	1.10644	-0.485394	-0.503657		0.926	-0.385398	-0.529095	-0.805098	-0.666352
0.926	-0.386481	1.10677	-0.485783	-0.503186		0.926	-0.386481	-0.529056	-0.806204	-0.666101
0.927	-0.386643	1.10635	-0.486051	-0.502832		0.927	-0.386643	-0.529347	-0.807137	-0.663848
0.928	-0.386866	1.10611	-0.487129	-0.503132		0.928	-0.386866	-0.53033	-0.808053	-0.664498
0.928	-0.387229	1.10554	-0.487094	-0.501876		0.928	-0.387229	-0.530234	-0.809067	-0.663986
0.929	-0.386897	1.10555	-0.486135	-0.500445		0.929	-0.386897	-0.529978	-0.809684	-0.66401
0.93	-0.386323	1.106	-0.485496	-0.499222		0.93	-0.386323	-0.53006	-0.811206	-0.663448
0.93	-0.38546	1.10617	-0.48574	-0.499204		0.93	-0.38546	-0.529577	-0.812865	-0.663164
0.931	-0.385107	1.10637	-0.485117	-0.500116		0.931	-0.385107	-0.530089	-0.814226	-0.663667
0.932	-0.383848	1.10443	-0.484501	-0.499944		0.932	-0.383848	-0.530968	-0.814844	-0.66306
0.932	-0.383418	1.10363	-0.483817	-0.499864		0.932	-0.383418	-0.530221	-0.814668	-0.663764
0.933	-0.384	1.10452	-0.482652	-0.500833		0.933	-0.384	-0.530327	-0.814959	-0.661973
0.934	-0.384578	1.10422	-0.481111	-0.499839		0.934	-0.384578	-0.529196	-0.814725	-0.662289
0.934	-0.38498	1.10215	-0.478975	-0.500167		0.934	-0.38498	-0.529079	-0.814562	-0.66294
0.935	-0.384817	1.10179	-0.476845	-0.500195		0.935	-0.384817	-0.528214	-0.814021	-0.663035
0.936	-0.38464	1.10024	-0.476204	-0.499758		0.936	-0.38464	-0.528167	-0.814454	-0.661673
0.936	-0.384781	1.09918	-0.476018	-0.499333		0.936	-0.384781	-0.5281	-0.815478	-0.661774
0.937	-0.384819	1.09843	-0.476347	-0.498448		0.937	-0.384819	-0.528211	-0.814522	-0.662375
0.938	-0.38535	1.09906	-0.478109	-0.498651		0.938	-0.38535	-0.529192	-0.813921	-0.662545
0.938	-0.385657	1.09997	-0.479264	-0.498158		0.938	-0.385657	-0.530356	-0.813833	-0.664322
0.939	-0.384837	1.09934	-0.480415	-0.498535		0.939	-0.384837	-0.530616	-0.813268	-0.665182
0.94	-0.38297	1.09968	-0.481297	-0.498381		0.94	-0.38297	-0.532447	-0.813146	-0.666948
0.94	-0.382024	1.09928	-0.481816	-0.498394		0.94	-0.382024	-0.532974	-0.814269	-0.669913
0.941	-0.381707	1.09913	-0.482979	-0.498399		0.941	-0.381707	-0.535019	-0.814762	-0.671881
0.942	-0.381845	1.09896	-0.484161	-0.498532		0.942	-0.381845	-0.535681	-0.81421	-0.671984
0.942	-0.381996	1.0992	-0.485011	-0.499784		0.942	-0.381996	-0.536283	-0.814168	-0.673102
0.943	-0.382696	1.0997	-0.48573	-0.500469		0.943	-0.382696	-0.537744	-0.815207	-0.673893
0.944	-0.382321	1.09961	-0.486778	-0.501988		0.944	-0.382321	-0.537672	-0.81482	-0.674602
0.944	-0.381636	1.10038	-0.486868	-0.503901		0.944	-0.381636	-0.538646	-0.814573	-0.67591
0.945	-0.38188	1.10033	-0.486307	-0.504308		0.945	-0.38188	-0.538643	-0.814949	-0.675283
0.946	-0.382443	1.10173	-0.48762	-0.505417		0.946	-0.382443	-0.53877	-0.816044	-0.675672
0.946	-0.382294	1.10215	-0.487333	-0.505795		0.946	-0.382294	-0.538615	-0.817361	-0.676393
0.947	-0.381258	1.10201	-0.487426	-0.506912		0.947	-0.381258	-0.538672	-0.818141	-0.67827
0.948	-0.380619	1.10158	-0.486412	-0.506516		0.948	-0.380619	-0.53973	-0.818831	-0.678927
0.948	-0.380567	1.1015	-0.485711	-0.506337		0.948	-0.380567	-0.540552	-0.820026	-0.679006
0.949	-0.380673	1.10135	-0.487226	-0.506795		0.949	-0.380673	-0.541237	-0.821724	-0.680151
0.95	-0.381319	1.10191	-0.488041	-0.507729		0.95	-0.381319	-0.541529	-0.822213	-0.681346
0.95	-0.382025	1.10191	-0.489246	-0.508508		0.95	-0.382025	-0.543341	-0.822919	-0.680857
0.951	-0.382093	1.10291	-0.490245	-0.509977		0.951	-0.382093	-0.545059	-0.8246	-0.681637
0.952	-0.38113	1.10327	-0.492441	-0.511604		0.952	-0.38113	-0.547129	-0.826061	-0.683168
0.952	-0.380002	1.10267	-0.493971	-0.513503		0.952	-0.380002	-0.547735	-0.827887	-0.684899
0.953	-0.378914	1.10325	-0.494097	-0.515134		0.953	-0.378914	-0.548027	-0.828243	-0.686182
0.954	-0.377019	1.10246	-0.493758	-0.517296		0.954	-0.377019	-0.5485	-0.830184	-0.68735
0.954	-0.376119	1.10325	-0.494818	-0.518811		0.954	-0.376119	-0.548862	-0.830713	-0.688624
0.955	-0.376623	1.10192	-0.49597	-0.519568		0.955	-0.376623	-0.549413	-0.831666	-0.690897
0.956	-0.376435	1.10067	-0.497926	-0.520558		0.956	-0.376435	-0.548439	-0.832265	-0.691412
0.956	-0.375794	1.09967	-0.499415	-0.520346		0.956	-0.375794	-0.548912	-0.833755	-0.691538
0.957	-0.375906	1.09846	-0.50022	-0.521647		0.957	-0.375906	-0.549638	-0.834518	-0.691534
0.958	-0.376816	1.09741	-0.500135	-0.521921		0.958	-0.376816	-0.549332	-0.836697	-0.69121
0.958	-0.378203	1.09605	-0.501856	-0.522784		0.958	-0.378203	-0.549534	-0.837481	-0.691643
0.959	-0.377816	1.09553	-0.502645	-0.521759		0.959	-0.377816	-0.547927	-0.839557	-0.691935
0.96	-0.376868	1.09374	-0.50237	-0.522299		0.96	-0.376868	-0.547966	-0.840672	-0.693082
0.96	-0.377069	1.09306	-0.503262	-0.52246		0.96	-0.377069	-0.548329	-0.840946	-0.694897
0.961	-0.377471	1.09218	-0.503303	-0.521079		0.961	-0.377471	-0.547878	-0.841651	-0.695259
0.962	-0.378156	1.09017	-0.503138	-0.521546		0.962	-0.378156	-0.548157	-0.84285	-0.696607
0.962	-0.379649	1.08893	-0.503665	-0.523642		0.962	-0.379649	-0.547922	-0.84472	-0.69697
0.963	-0.381156	1.08812	-0.50557	-0.525679		0.963	-0.381156	-0.548023	-0.845428	-0.697747
0.964	-0.382049	1.08658	-0.505666	-0.52665		0.964	-0.382049	-0.547526	-0.846597	-0.698763
0.964	-0.382697	1.08479	-0.5064	-0.526829		0.964	-0.382697	-0.547283	-0.847271	-0.699711
0.965	-0.382697	1.08444	-0.507084	-0.52798		0.965	-0.382697	-0.547595	-0.848043	-0.699266
0.966	-0.38145	1.08284	-0.507718	-0.528836		0.966	-0.38145	-0.54716	-0.85058	-0.699965
0.966	-0.380007	1.08131	-0.509042	-0.52911		0.966	-0.380007	-0.545855	-0.850972	-0.70084
0.967	-0.379855	1.07995	-0.510597	-0.529335		0.967	-0.379855	-0.545976	-0.852388	-0.700607
0.968	-0.379675	1.0798	-0.511583	-0.529849		0.968	-0.379675	-0.545053	-0.852298	-0.702021
0.968	-0.379673	1.07822	-0.513472	-0.529605		0.968	-0.379673	-0.544683	-0.854342	-0.703425
0.969	-0.379855	1.0777	-0.513316	-0.530713		0.969	-0.379855	-0.545127	-0.855831	-0.704204
0.97	-0.379374	1.07862	-0.513363	-0.53213		0.97	-0.379374	-0.545466	-0.8566	-0.70418
0.97	-0.378912	1.07938	-0.512507	-0.53284		0.97	-0.378912	-0.545651	-0.857556	-0.705008
0.971	-0.378379	1.0765	-0.51217	-0.532546		0.971	-0.378379	-0.545362	-0.859254	-0.705828
0.972	-0.377874	1.07392	-0.511798	-0.533057		0.972	-0.377874	-0.544242	-0.861004	-0.704919
0.972	-0.37766	1.07241	-0.511363	-0.533281		0.972	-0.37766	-0.543226	-0.862622	-0.705018
0.973	-0.379133	1.06997	-0.5113	-0.533031		0.973	-0.379133	-0.541914	-0.863888	-0.704426
0.974	-0.381521	1.06998	-0.51078	-0.532482		0.974	-0.381521	-0.541749	-0.864061	-0.703187
0.974	-0.382968	1.06956	-0.509729	-0.532116		0.974	-0.382968	-0.539535	-0.864126	-0.702608
0.975	-0.383316	1.06796	-0.509586	-0.530919		0.975	-0.383316	-0.538467	-0.864654	-0.702647
0.976	-0.383245	1.06539	-0.509575	-0.530479		0.976	-0.383245	-0.538312	-0.866104	-0.701931
0.976	-0.383264	1.06344	-0.509504	-0.531304		0.976	-0.383264	-0.539269	-0.865721	-0.702287
0.977	-0.383362	1.06234	-0.508871	-0.531514		0.977	-0.383362	-0.539981	-0.866294	-0.701883
0.978	-0.384958	1.06098	-0.509086	-0.531627		0.978	-0.384958	-0.539621	-0.866144	-0.701385
0.978	-0.385747	1.06042	-0.509676	-0.53137		0.978	-0.385747	-0.539541	-0.866907	-0.702221
0.979	-0.385613	1.05721	-0.509345	-0.531373		0.979	-0.385613	-0.539605	-0.866143	-0.701515
0.98	-0.386491	1.05634	-0.510027	-0.532591		0.98	-0.386491	-0.539654	-0.865928	-0.701998
0.98	-0.387991	1.05505	-0.510759	-0.532927		0.98	-0.387991	-0.539609	-0.865817	-0.701062
0.981	-0.389209	1.05386	-0.512249	-0.533552		0.981	-0.389209	-0.539253	-0.86577	-0.699721
0.982	-0.389704	1.05262	-0.513799	-0.534269		0.982	-0.389704	-0.539842	-0.865162	-0.701099
0.982	-0.389694	1.05034	-0.51297	-0.534339		0.982	-0.389694	-0.539583	-0.864666	-0.700641
0.983	-0.389354	1.04743	-0.513041	-0.534541		0.983	-0.389354	-0.540162	-0.864816	-0.699829
0.984	-0.38886	1.0453	-0.513871	-0.534714		0.984	-0.38886	-0.539539	-0.865084	-0.699147
0.984	-0.388388	1.04306	-0.514388	-0.534279		0.984	-0.388388	-0.538102	-0.864744	-0.698296
0.985	-0.388871	1.04061	-0.514822	-0.533693		0.985	-0.388871	-0.536122	-0.86469	-0.696633
0.986	-0.389651	1.03907	-0.51466	-0.533471		0.986	-0.389651	-0.534699	-0.864277	-0.696197
0.986	-0.390064	1.03607	-0.515666	-0.533425		0.986	-0.390064	-0.533104	-0.864908	-0.695803
0.987	-0.390888	1.03474	-0.51694	-0.533866		0.987	-0.390888	-0.532049	-0.863721	-0.695332
0.988	-0.390665	1.03359	-0.516966	-0.533973		0.988	-0.390665	-0.531586	-0.863409	-0.694244
0.988	-0.389979	1.03222	-0.51671	-0.533271		0.988	-0.389979	-0.53072	-0.863818	-0.692128
0.989	-0.38989	1.03072	-0.515629	-0.533776		0.989	-0.38989	-0.529291	-0.864691	-0.691294
0.99	-0.390086	1.03118	-0.515381	-0.535838		0.99	-0.390086	-0.528685	-0.864886	-0.691458
0.99	-0.390469	1.03023	-0.514598	-0.537181		0.99	-0.390469	-0.528152	-0.864941	-0.691224
0.991	-0.389485	1.02948	-0.515789	-0.538398		0.991	-0.389485	-0.529022	-0.864111	-0.69123
0.992	-0.388085	1.02937	-0.516007	-0.539516		0.992	-0.388085	-0.528764	-0.864154	-0.691646
0.992	-0.388263	1.02904	-0.516315	-0.540677		0.992	-0.388263	-0.528615	-0.86409	-0.692479
0.993	-0.388697	1.02975	-0.517152	-0.541252		0.993	-0.388697	-0.530567	-0.864189	-0.690943
0.994	-0.38878	1.0302	-0.516709	-0.541661		0.994	-0.38878	-0.530724	-0.864827	-0.690302
0.994	-0.389196	1.02987	-0.516814	-0.542781		0.994	-0.389196	-0.531113	-0.865304	-0.689189
0.995	-0.388911	1.03054	-0.517475	-0.543705		0.995	-0.388911	-0.531847	-0.866106	-0.687578
0.996	-0.388362	1.03003	-0.517707	-0.543528		0.996	-0.388362	-0.531939	-0.866107	-0.688014
0.996	-0.389077	1.02934	-0.516756	-0.543439		0.996	-0.389077	-0.530855	-0.865708	-0.68717
0.997	-0.389623	1.02883	-0.516595	-0.54348		0.997	-0.389623	-0.531689	-0.866007	-0.686929
0.998	-0.389415	1.02952	-0.516623	-0.543755		0.998	-0.389415	-0.532258	-0.865622	-0.685444
0.998	-0.389346	1.03039	-0.515497	-0.543671		0.998	-0.389346	-0.532799	-0.865483	-0.685047
0.999	-0.389629	1.03046	-0.515966	-0.54472		0.999	-0.389629	-0.533329	-0.864295	-0.684596
1	-0.389007	1.03054	-0.516651	-0.546304		1	-0.389007	-0.53358	-0.864764	-0.684682
1	-0.388723	1.03123	-0.516176	-0.546874		1	-0.388723	-0.533665	-0.863328	-0.685671
1.001	-0.389686	1.03061	-0.516892	-0.547131		1.001	-0.389686	-0.534804	-0.86178	-0.684585
1.002	-0.390616	1.03101	-0.517296	-0.547525		1.002	-0.390616	-0.537122	-0.861169	-0.684389
1.002	-0.391178	1.0326	-0.517705	-0.547276		1.002	-0.391178	-0.537472	-0.861044	-0.684769
1.003	-0.392185	1.0397	-0.5204	-0.542818		1.003	-0.392185	-0.553342	-0.851248	-0.693676
1.004	-0.384342	1.03991	-0.52008	-0.541767		1.004	-0.384342	-0.554738	-0.85356	-0.696077
1.004	-0.381517	1.04108	-0.520717	-0.542152		1.004	-0.381517	-0.554324	-0.85549	-0.696729
1.005	-0.380938	1.04242	-0.52145	-0.542566		1.005	-0.380938	-0.554146	-0.856192	-0.697325
1.006	-0.38168	1.04317	-0.521203	-0.542864		1.006	-0.38168	-0.554089	-0.856469	-0.698608
1.006	-0.382271	1.04355	-0.521053	-0.544574		1.006	-0.382271	-0.555011	-0.856869	-0.699805
1.007	-0.382142	1.04365	-0.520676	-0.545302		1.007	-0.382142	-0.556058	-0.857562	-0.70082
1.008	-0.3818	1.04362	-0.521487	-0.544971		1.008	-0.3818	-0.557058	-0.858486	-0.700916
1.008	-0.381667	1.04516	-0.521459	-0.545141		1.008	-0.381667	-0.559127	-0.860045	-0.701559
1.009	-0.382256	1.04555	-0.520453	-0.544774		1.009	-0.382256	-0.560433	-0.861341	-0.703136
1.01	-0.382522	1.04547	-0.521319	-0.544439		1.01	-0.382522	-0.561491	-0.862624	-0.704659
1.01	-0.383427	1.04581	-0.522041	-0.545288		1.01	-0.383427	-0.562743	-0.86282	-0.705593
1.011	-0.383492	1.04664	-0.522359	-0.54389		1.011	-0.383492	-0.564252	-0.862602	-0.705718
1.012	-0.383423	1.0448	-0.522958	-0.542616		1.012	-0.383423	-0.564949	-0.861958	-0.706172
1.012	-0.382426	1.04509	-0.523362	-0.542285		1.012	-0.382426	-0.564935	-0.862258	-0.707672
1.013	-0.381356	1.04433	-0.522973	-0.542814		1.013	-0.381356	-0.564742	-0.862788	-0.707849
1.014	-0.380427	1.04517	-0.522639	-0.542188		1.014	-0.380427	-0.565715	-0.86135	-0.707175
1.014	-0.379306	1.0461	-0.522479	-0.54143		1.014	-0.379306	-0.567751	-0.859901	-0.708163
1.015	-0.378246	1.0453	-0.52185	-0.541022		1.015	-0.378246	-0.567331	-0.859875	-0.709506
1.016	-0.377553	1.04447	-0.522323	-0.54188		1.016	-0.377553	-0.568231	-0.85976	-0.709592
1.016	-0.377574	1.04475	-0.521502	-0.542905		1.016	-0.377574	-0.569532	-0.859692	-0.710298
1.017	-0.377298	1.04487	-0.521157	-0.54264		1.017	-0.377298	-0.569893	-0.859263	-0.710756
1.018	-0.377541	1.04566	-0.520691	-0.542338		1.018	-0.377541	-0.570776	-0.859472	-0.710777
1.018	-0.377499	1.0459	-0.519869	-0.542328		1.018	-0.377499	-0.572066	-0.859331	-0.7116
1.019	-0.377261	1.04587	-0.51961	-0.542673		1.019	-0.377261	-0.573187	-0.858801	-0.7124
1.02	-0.377169	1.04535	-0.519755	-0.542352		1.02	-0.377169	-0.572977	-0.859243	-0.713357
1.02	-0.377262	1.04606	-0.52024	-0.54201		1.02	-0.377262	-0.572371	-0.858938	-0.714586
1.021	-0.378047	1.04721	-0.519598	-0.541203		1.021	-0.378047	-0.572803	-0.859101	-0.714292
1.022	-0.378113	1.0471	-0.518934	-0.539016		1.021	-0.378113	-0.573442	-0.859865	-0.714259
1.022	-0.378455	1.04664	-0.519458	-0.537768		1.022	-0.378455	-0.573388	-0.861916	-0.714578
1.023	-0.377505	1.04766	-0.52009	-0.538217		1.023	-0.377505	-0.573606	-0.863426	-0.715382
1.024	-0.376114	1.04827	-0.520219	-0.539032		1.023	-0.376114	-0.572153	-0.865066	-0.715526
1.024	-0.375466	1.04711	-0.520714	-0.539321		1.024	-0.375466	-0.57232	-0.865565	-0.716465
1.025	-0.374923	1.04703	-0.519311	-0.538782		1.025	-0.374923	-0.572556	-0.865646	-0.717444
1.026	-0.374049	1.04646	-0.518222	-0.538603		1.025	-0.374049	-0.570566	-0.866014	-0.717958
1.026	-0.373474	1.04716	-0.517657	-0.538378		1.026	-0.373474	-0.570416	-0.867371	-0.717837
1.027	-0.373177	1.04685	-0.515831	-0.537788		1.027	-0.373177	-0.570912	-0.868942	-0.718009
1.028	-0.373263	1.04805	-0.515034	-0.536947		1.027	-0.373263	-0.571624	-0.870442	-0.71831
1.028	-0.374317	1.0487	-0.5141	-0.535551		1.028	-0.374317	-0.572576	-0.870761	-0.717007
1.029	-0.374929	1.04996	-0.513682	-0.533766		1.029	-0.374929	-0.572735	-0.870618	-0.714836
1.03	-0.375013	1.04987	-0.513649	-0.533548		1.029	-0.375013	-0.572473	-0.870006	-0.714286
1.03	-0.374958	1.04921	-0.513689	-0.534265		1.03	-0.374958	-0.573419	-0.871335	-0.713951
1.031	-0.374653	1.04876	-0.513992	-0.534341		1.031	-0.374653	-0.574027	-0.872475	-0.71221
1.032	-0.373553	1.04912	-0.514105	-0.533962		1.031	-0.373553	-0.574233	-0.872318	-0.711433
1.032	-0.373668	1.04907	-0.51481	-0.53347		1.032	-0.373668	-0.574506	-0.871711	-0.710226
1.033	-0.373801	1.04949	-0.515482	-0.534068		1.033	-0.373801	-0.574119	-0.870717	-0.709405
1.034	-0.37299	1.04994	-0.516164	-0.533772		1.033	-0.37299	-0.57374	-0.870459	-0.709801
1.034	-0.372842	1.05008	-0.516478	-0.533386		1.034	-0.372842	-0.573557	-0.870592	-0.709757
1.035	-0.373065	1.05	-0.518037	-0.533166		1.035	-0.373065	-0.574137	-0.870131	-0.710582
1.036	-0.373585	1.05015	-0.519221	-0.533622		1.035	-0.373585	-0.573312	-0.868978	-0.710828
1.036	-0.37413	1.04994	-0.520512	-0.534469		1.036	-0.37413	-0.572131	-0.867513	-0.710089
1.037	-0.375471	1.04947	-0.520297	-0.534671		1.037	-0.375471	-0.571365	-0.866783	-0.708636
1.038	-0.377097	1.04911	-0.520091	-0.534504		1.037	-0.377097	-0.571338	-0.867575	-0.708511
1.038	-0.377629	1.0487	-0.520626	-0.534103		1.038	-0.377629	-0.570827	-0.867471	-0.707808
1.039	-0.378102	1.04871	-0.520235	-0.533207		1.039	-0.378102	-0.570717	-0.866852	-0.706808
1.04	-0.37875	1.04929	-0.519707	-0.531581		1.039	-0.37875	-0.57045	-0.865761	-0.70681
1.04	-0.379205	1.05047	-0.520013	-0.5304		1.04	-0.379205	-0.57121	-0.864764	-0.705999
1.041	-0.379468	1.05149	-0.520558	-0.530286		1.041	-0.379468	-0.572661	-0.863044	-0.70627
1.042	-0.379244	1.05186	-0.521154	-0.529715		1.041	-0.379244	-0.573725	-0.861617	-0.706191
1.042	-0.379215	1.05174	-0.522779	-0.529211		1.042	-0.379215	-0.574922	-0.861264	-0.70442
1.043	-0.379237	1.05141	-0.523574	-0.528602		1.043	-0.379237	-0.575223	-0.860232	-0.704695
1.044	-0.378971	1.05138	-0.524192	-0.527484		1.043	-0.378971	-0.575591	-0.858992	-0.705048
1.044	-0.379175	1.05156	-0.524562	-0.527885		1.044	-0.379175	-0.577046	-0.858235	-0.705074
1.045	-0.379086	1.05178	-0.525015	-0.528661		1.045	-0.379086	-0.577012	-0.857639	-0.705737
1.046	-0.378756	1.05166	-0.525044	-0.528993		1.045	-0.378756	-0.578161	-0.857078	-0.704597
1.046	-0.378958	1.05179	-0.525423	-0.528148		1.046	-0.378958	-0.579342	-0.856138	-0.705316
1.047	-0.379586	1.05078	-0.525773	-0.528778		1.047	-0.379586	-0.580391	-0.855999	-0.705762
1.048	-0.379459	1.04949	-0.524914	-0.529369		1.047	-0.379459	-0.580244	-0.855301	-0.705016
1.048	-0.379667	1.04904	-0.525177	-0.530279		1.048	-0.379667	-0.581316	-0.853967	-0.704684
1.049	-0.379724	1.04971	-0.524296	-0.530087		1.049	-0.379724	-0.581736	-0.853398	-0.706075
1.05	-0.378889	1.05046	-0.525119	-0.529347		1.049	-0.378889	-0.581837	-0.853044	-0.706935
1.05	-0.378677	1.04933	-0.525799	-0.528179		1.05	-0.378677	-0.582358	-0.85262	-0.707408
1.051	-0.378372	1.04844	-0.526922	-0.528153		1.051	-0.378372	-0.582691	-0.85288	-0.706993
1.052	-0.37818	1.04789	-0.528371	-0.527807		1.051	-0.37818	-0.582857	-0.852941	-0.707797
1.052	-0.377964	1.04851	-0.529613	-0.52785		1.052	-0.377964	-0.582172	-0.853001	-0.707696
1.053	-0.377518	1.04861	-0.528798	-0.527661		1.053	-0.377518	-0.58187	-0.851773	-0.709409
1.054	-0.377655	1.04709	-0.529201	-0.527609		1.053	-0.377655	-0.582262	-0.851662	-0.709646
1.054	-0.378753	1.04571	-0.529717	-0.52831		1.054	-0.378753	-0.581998	-0.851897	-0.710877
1.055	-0.379404	1.04434	-0.530244	-0.52897		1.055	-0.379404	-0.583245	-0.850561	-0.711322
1.056	-0.378839	1.04264	-0.530216	-0.530825		1.055	-0.378839	-0.584484	-0.850484	-0.711362
1.056	-0.378818	1.04157	-0.530213	-0.531383		1.056	-0.378818	-0.586405	-0.85084	-0.711755
1.057	-0.378771	1.03949	-0.530057	-0.531265		1.057	-0.378771	-0.587384	-0.849593	-0.711993
1.058	-0.378442	1.03862	-0.530007	-0.53188		1.057	-0.378442	-0.587097	-0.849411	-0.71187
1.058	-0.378147	1.03844	-0.530089	-0.533632		1.058	-0.378147	-0.587524	-0.850068	-0.712057
1.059	-0.378088	1.03856	-0.53018	-0.535615		1.059	-0.378088	-0.588625	-0.850628	-0.713434
1.06	-0.378331	1.03775	-0.529697	-0.538164		1.059	-0.378331	-0.589563	-0.84968	-0.712994
1.06	-0.37883	1.03716	-0.530121	-0.540427		1.06	-0.37883	-0.589072	-0.849918	-0.712634
1.061	-0.379519	1.0361	-0.532401	-0.541576		1.061	-0.379519	-0.588986	-0.849942	-0.712667
1.062	-0.379008	1.03561	-0.534383	-0.543877		1.061	-0.379008	-0.589539	-0.851074	-0.713998
1.062	-0.378305	1.0338	-0.536188	-0.544965		1.062	-0.378305	-0.59023	-0.853231	-0.716568
1.063	-0.378697	1.03308	-0.537949	-0.544969		1.063	-0.378697	-0.590863	-0.855183	-0.718196
1.064	-0.37868	1.03348	-0.538872	-0.545244		1.063	-0.37868	-0.591481	-0.855467	-0.718128
1.064	-0.378542	1.0321	-0.538176	-0.54655		1.064	-0.378542	-0.590215	-0.855731	-0.719584
1.065	-0.37959	1.03121	-0.538711	-0.547941		1.065	-0.37959	-0.590579	-0.856413	-0.720848
1.066	-0.380215	1.02989	-0.538795	-0.547998		1.065	-0.380215	-0.589904	-0.855955	-0.722208
1.066	-0.380269	1.02972	-0.538224	-0.547238		1.066	-0.380269	-0.589862	-0.857423	-0.722547
1.067	-0.38249	1.03019	-0.538112	-0.546182		1.067	-0.38249	-0.590728	-0.85856	-0.722479
1.068	-0.383276	1.03085	-0.537461	-0.546367		1.067	-0.383276	-0.591398	-0.859306	-0.722455
1.068	-0.383543	1.03226	-0.536629	-0.547387		1.068	-0.383543	-0.591642	-0.859721	-0.722538
1.069	-0.383974	1.03281	-0.536047	-0.547298		1.069	-0.383974	-0.591364	-0.859729	-0.722918
1.07	-0.384746	1.03366	-0.53562	-0.547034		1.069	-0.384746	-0.593288	-0.86088	-0.722718
1.07	-0.385438	1.0344	-0.534597	-0.547469		1.07	-0.385438	-0.593129	-0.861944	-0.7225
1.071	-0.38445	1.03472	-0.533279	-0.54691		1.071	-0.38445	-0.594863	-0.861411	-0.722957
1.072	-0.384589	1.03659	-0.531269	-0.545941		1.071	-0.384589	-0.596006	-0.861792	-0.724203
1.072	-0.385199	1.03787	-0.530976	-0.545745		1.072	-0.385199	-0.596915	-0.862014	-0.724749
1.073	-0.385579	1.03768	-0.531716	-0.546274		1.073	-0.385579	-0.597644	-0.862187	-0.724652
1.074	-0.385531	1.03659	-0.531507	-0.546006		1.073	-0.385531	-0.597765	-0.862119	-0.725677
1.074	-0.385597	1.03617	-0.529157	-0.545378		1.074	-0.385597	-0.596924	-0.863238	-0.725372
1.075	-0.386374	1.03608	-0.527606	-0.545104		1.075	-0.386374	-0.596549	-0.863392	-0.725231
1.076	-0.386812	1.03679	-0.524881	-0.544853		1.075	-0.386812	-0.596172	-0.862987	-0.725576
1.076	-0.387339	1.03749	-0.521847	-0.545436		1.076	-0.387339	-0.596117	-0.862673	-0.72539
1.077	-0.387882	1.03815	-0.51992	-0.546493		1.077	-0.387882	-0.596388	-0.863319	-0.725345
1.078	-0.386874	1.03814	-0.518996	-0.546939		1.077	-0.386874	-0.595631	-0.864056	-0.725313
1.078	-0.386672	1.0384	-0.51673	-0.546355		1.078	-0.386672	-0.595389	-0.865461	-0.724773
1.079	-0.386918	1.03933	-0.516302	-0.545462		1.079	-0.386918	-0.594986	-0.866802	-0.72409
1.08	-0.388295	1.04	-0.515445	-0.545352		1.079	-0.388295	-0.594316	-0.868147	-0.722885
1.08	-0.389375	1.04057	-0.514974	-0.545138		1.08	-0.389375	-0.59294	-0.869148	-0.723951
1.081	-0.391111	1.04158	-0.515061	-0.544487		1.081	-0.391111	-0.592731	-0.871422	-0.724156
1.082	-0.391801	1.04271	-0.514355	-0.544133		1.081	-0.391801	-0.591903	-0.873029	-0.724672
1.082	-0.391718	1.04287	-0.513883	-0.544003		1.082	-0.391718	-0.591674	-0.874244	-0.723851
1.083	-0.392457	1.0418	-0.512889	-0.543738		1.083	-0.392457	-0.590978	-0.875636	-0.723351
1.084	-0.392648	1.04187	-0.511362	-0.543829		1.083	-0.392648	-0.59024	-0.8776	-0.723249
1.084	-0.392159	1.04147	-0.509942	-0.544189		1.084	-0.392159	-0.590126	-0.87823	-0.723771
1.085	-0.391448	1.04012	-0.508419	-0.544329		1.085	-0.391448	-0.590549	-0.879584	-0.72463
1.086	-0.391854	1.03929	-0.507494	-0.544207		1.085	-0.391854	-0.590983	-0.880916	-0.724956
1.086	-0.393487	1.03899	-0.508489	-0.544177		1.086	-0.393487	-0.592303	-0.882319	-0.723943
1.087	-0.39366	1.03912	-0.508285	-0.544369		1.087	-0.39366	-0.593185	-0.882546	-0.723113
1.088	-0.393278	1.03881	-0.508356	-0.543816		1.087	-0.393278	-0.593796	-0.883215	-0.724341
1.088	-0.393101	1.03866	-0.507884	-0.543116		1.088	-0.393101	-0.593593	-0.884884	-0.724695
1.089	-0.393817	1.03911	-0.506776	-0.542516		1.089	-0.393817	-0.593975	-0.884068	-0.724902
1.09	-0.394286	1.03924	-0.505609	-0.541935		1.089	-0.394286	-0.593722	-0.882552	-0.723459
1.09	-0.394317	1.03979	-0.505073	-0.541927		1.09	-0.394317	-0.594087	-0.881356	-0.723299
1.091	-0.394742	1.04088	-0.505635	-0.541197		1.091	-0.394742	-0.594971	-0.880988	-0.723355
1.092	-0.395979	1.04138	-0.506291	-0.540132		1.091	-0.395979	-0.595242	-0.87991	-0.722988
1.092	-0.395938	1.04154	-0.506008	-0.539507		1.092	-0.395938	-0.595242	-0.878781	-0.722931
1.093	-0.395387	1.04178	-0.505407	-0.538728		1.093	-0.395387	-0.595857	-0.879275	-0.722997
1.093	-0.395844	1.04123	-0.505077	-0.537812		1.093	-0.395844	-0.596257	-0.879191	-0.723449
1.094	-0.396478	1.04082	-0.503097	-0.537681		1.094	-0.396478	-0.5958	-0.878497	-0.723267
1.095	-0.396658	1.04015	-0.50213	-0.537085		1.095	-0.396658	-0.594927	-0.877855	-0.723094
1.095	-0.397243	1.0393	-0.501338	-0.537007		1.095	-0.397243	-0.594016	-0.877781	-0.721712
1.096	-0.39739	1.03916	-0.49989	-0.537604		1.096	-0.39739	-0.59356	-0.877993	-0.721018
1.097	-0.397631	1.03829	-0.499464	-0.537171		1.097	-0.397631	-0.593516	-0.878408	-0.721739
1.097	-0.397728	1.03764	-0.49982	-0.536182		1.097	-0.397728	-0.594742	-0.879241	-0.721812
1.098	-0.397546	1.0375	-0.500422	-0.535331		1.098	-0.397546	-0.595934	-0.879445	-0.721088
1.099	-0.397209	1.03796	-0.50118	-0.535038		1.099	-0.397209	-0.596946	-0.880588	-0.721064
1.099	-0.397035	1.03774	-0.501788	-0.535737		1.099	-0.397035	-0.597774	-0.88035	-0.720587
1.1	-0.395375	1.03615	-0.50164	-0.537073		1.1	-0.395375	-0.597247	-0.879694	-0.720172
1.101	-0.395373	1.03455	-0.502608	-0.536854		1.101	-0.395373	-0.596108	-0.878904	-0.719799
1.101	-0.395197	1.03239	-0.502243	-0.535914		1.101	-0.395197	-0.596057	-0.878583	-0.720271
1.102	-0.395329	1.0311	-0.501853	-0.535346		1.102	-0.395329	-0.596887	-0.878263	-0.720363
1.103	-0.394825	1.03095	-0.502064	-0.534444		1.103	-0.394825	-0.597007	-0.877835	-0.720921
1.103	-0.394289	1.03058	-0.502489	-0.533196		1.103	-0.394289	-0.597724	-0.878057	-0.722317
1.104	-0.394699	1.03053	-0.503815	-0.532062		1.104	-0.394699	-0.597635	-0.877793	-0.721641
1.105	-0.39452	1.02999	-0.50544	-0.531495		1.105	-0.39452	-0.597607	-0.877502	-0.721211
1.105	-0.392947	1.02927	-0.505403	-0.531726		1.105	-0.392947	-0.597297	-0.877493	-0.721046
1.106	-0.391653	1.02946	-0.505263	-0.531632		1.106	-0.391653	-0.597938	-0.877563	-0.72122
1.107	-0.391619	1.03029	-0.505289	-0.53137		1.107	-0.391619	-0.598293	-0.877701	-0.719682
1.107	-0.391893	1.03113	-0.506309	-0.530779		1.107	-0.391893	-0.598608	-0.877558	-0.719663
1.108	-0.391829	1.03143	-0.507301	-0.530135		1.108	-0.391829	-0.598361	-0.878346	-0.720081
1.109	-0.39195	1.03141	-0.509463	-0.52893		1.109	-0.39195	-0.5986	-0.878611	-0.720957
1.109	-0.392125	1.03255	-0.5118	-0.527501		1.109	-0.392125	-0.598047	-0.879094	-0.720678
1.11	-0.393051	1.03426	-0.512952	-0.526222		1.11	-0.393051	-0.596729	-0.879336	-0.71996
1.111	-0.394443	1.03513	-0.513796	-0.524491		1.111	-0.394443	-0.595978	-0.878139	-0.720064
1.111	-0.395207	1.03566	-0.515217	-0.52356		1.111	-0.395207	-0.595498	-0.877224	-0.719896
1.112	-0.395978	1.03644	-0.516575	-0.522972		1.112	-0.395978	-0.595425	-0.876762	-0.720436
1.113	-0.396693	1.03645	-0.517483	-0.522051		1.113	-0.396693	-0.595378	-0.876697	-0.722044
1.113	-0.396125	1.03579	-0.518292	-0.520518		1.113	-0.396125	-0.595801	-0.877241	-0.720526
1.114	-0.395838	1.03531	-0.52022	-0.519702		1.114	-0.395838	-0.595776	-0.876444	-0.720279
1.115	-0.395461	1.03452	-0.522188	-0.51908		1.115	-0.395461	-0.595289	-0.87572	-0.718788
1.115	-0.396467	1.0339	-0.522831	-0.518476		1.115	-0.396467	-0.593184	-0.876873	-0.718862
1.116	-0.398027	1.03403	-0.523943	-0.518045		1.116	-0.398027	-0.593929	-0.877421	-0.718251
1.117	-0.39929	1.03472	-0.524595	-0.517727		1.117	-0.39929	-0.594722	-0.876501	-0.71819
1.117	-0.400946	1.03548	-0.525791	-0.516472		1.117	-0.400946	-0.595065	-0.875159	-0.718032
1.118	-0.4025	1.03657	-0.527218	-0.516173		1.118	-0.4025	-0.595703	-0.87405	-0.716363
1.119	-0.402203	1.03697	-0.527881	-0.516229		1.119	-0.402203	-0.59646	-0.872816	-0.715263
1.119	-0.401657	1.03634	-0.528488	-0.516319		1.119	-0.401657	-0.596984	-0.872807	-0.714558
1.12	-0.401596	1.03608	-0.529506	-0.516495		1.12	-0.401596	-0.597027	-0.8736	-0.713077
1.121	-0.402087	1.03591	-0.529399	-0.516977		1.121	-0.402087	-0.597087	-0.873053	-0.710132
1.121	-0.40249	1.03633	-0.530219	-0.517673		1.121	-0.40249	-0.597381	-0.872	-0.708865
1.122	-0.402948	1.03718	-0.532536	-0.518332		1.122	-0.402948	-0.596658	-0.871829	-0.707411
1.123	-0.403662	1.03761	-0.533797	-0.518211		1.123	-0.403662	-0.596035	-0.873827	-0.707177
1.123	-0.405512	1.03777	-0.534437	-0.518243		1.123	-0.405512	-0.595393	-0.876949	-0.706588
1.124	-0.40622	1.03702	-0.534219	-0.519288		1.124	-0.40622	-0.594229	-0.877613	-0.705855
1.125	-0.40557	1.0364	-0.534542	-0.519849		1.125	-0.40557	-0.593796	-0.878863	-0.705107
1.125	-0.405556	1.03603	-0.534942	-0.520571		1.125	-0.405556	-0.594083	-0.881711	-0.704762
1.126	-0.407306	1.03552	-0.534552	-0.520782		1.126	-0.407306	-0.593363	-0.88201	-0.705033
1.127	-0.408348	1.03526	-0.534938	-0.520993		1.127	-0.408348	-0.592296	-0.882385	-0.705314
1.127	-0.406863	1.03484	-0.534941	-0.52137		1.127	-0.406863	-0.592663	-0.882664	-0.704383
1.128	-0.406692	1.03494	-0.534733	-0.522856		1.128	-0.406692	-0.593186	-0.882892	-0.703595
1.129	-0.406548	1.03537	-0.534427	-0.523353		1.129	-0.406548	-0.593847	-0.882342	-0.702931
1.129	-0.405676	1.0356	-0.535003	-0.523816		1.129	-0.405676	-0.594371	-0.882687	-0.702647
1.13	-0.406001	1.03563	-0.534066	-0.524787		1.13	-0.406001	-0.593683	-0.882896	-0.702656
1.131	-0.406841	1.03595	-0.533227	-0.525306		1.131	-0.406841	-0.59266	-0.881625	-0.703535
1.131	-0.407042	1.03568	-0.53171	-0.52553		1.131	-0.407042	-0.591274	-0.88279	-0.705308
1.132	-0.408166	1.03549	-0.529958	-0.526083		1.132	-0.408166	-0.589347	-0.882948	-0.705274
1.133	-0.408329	1.0359	-0.530034	-0.526756		1.133	-0.408329	-0.587926	-0.883376	-0.70631
1.133	-0.409095	1.03652	-0.529269	-0.52678		1.133	-0.409095	-0.588016	-0.882805	-0.706854
1.134	-0.408934	1.0373	-0.528145	-0.527317		1.134	-0.408934	-0.588972	-0.883566	-0.707415
1.135	-0.408689	1.03832	-0.527731	-0.528185		1.135	-0.408689	-0.589582	-0.883339	-0.707374
1.135	-0.407513	1.03803	-0.526403	-0.528936		1.135	-0.407513	-0.58949	-0.883794	-0.707641
1.136	-0.407186	1.03742	-0.524484	-0.530269		1.136	-0.407186	-0.588962	-0.882885	-0.707858
1.137	-0.40812	1.03675	-0.523807	-0.531508		1.137	-0.40812	-0.588205	-0.882201	-0.708698
1.137	-0.407919	1.03605	-0.523322	-0.532819		1.137	-0.407919	-0.58684	-0.882351	-0.709745
1.138	-0.406854	1.03571	-0.522587	-0.534551		1.138	-0.406854	-0.58533	-0.883005	-0.711067
1.139	-0.407306	1.03424	-0.522724	-0.536022		1.139	-0.407306	-0.584586	-0.882188	-0.712141
1.139	-0.40861	1.03278	-0.521736	-0.536804		1.139	-0.40861	-0.583731	-0.88331	-0.713375
1.14	-0.409199	1.03158	-0.522146	-0.537623		1.14	-0.409199	-0.582656	-0.884443	-0.71448
1.141	-0.408376	1.03038	-0.520922	-0.538408		1.141	-0.408376	-0.582472	-0.886049	-0.715095
1.141	-0.408882	1.02941	-0.519603	-0.53907		1.141	-0.408882	-0.58261	-0.88727	-0.715866
1.142	-0.408123	1.02843	-0.518162	-0.539838		1.142	-0.408123	-0.582079	-0.888349	-0.717374
1.143	-0.407788	1.0264	-0.518301	-0.541551		1.143	-0.407788	-0.581966	-0.889411	-0.71889
1.143	-0.407838	1.02386	-0.519019	-0.543606		1.143	-0.407838	-0.58195	-0.891053	-0.721056
1.144	-0.407319	1.02191	-0.518614	-0.545689		1.144	-0.407319	-0.582295	-0.892319	-0.722859
1.145	-0.406691	1.02069	-0.519189	-0.547119		1.145	-0.406691	-0.583234	-0.89292	-0.725482
1.145	-0.406138	1.01908	-0.517941	-0.547895		1.145	-0.406138	-0.583834	-0.892235	-0.726773
1.146	-0.405165	1.01734	-0.516881	-0.548743		1.146	-0.405165	-0.5837	-0.891295	-0.727826
1.147	-0.405019	1.01653	-0.516206	-0.549364		1.147	-0.405019	-0.58401	-0.890692	-0.728767
1.147	-0.405905	1.01566	-0.514108	-0.549633		1.147	-0.405905	-0.583977	-0.89149	-0.730466
1.148	-0.407193	1.0146	-0.512609	-0.548698		1.148	-0.407193	-0.584182	-0.891244	-0.732577
1.149	-0.407061	1.01415	-0.512642	-0.548157		1.149	-0.407061	-0.586508	-0.889448	-0.732872
1.149	-0.405736	1.01359	-0.513281	-0.549162		1.149	-0.405736	-0.588022	-0.889295	-0.732918
1.15	-0.40543	1.013	-0.514065	-0.550338		1.15	-0.40543	-0.588125	-0.88998	-0.733132
1.151	-0.405239	1.01242	-0.512729	-0.551617		1.151	-0.405239	-0.588605	-0.890417	-0.732511
1.151	-0.405137	1.01215	-0.510933	-0.551999		1.151	-0.405137	-0.589505	-0.890341	-0.732663
1.152	-0.405456	1.01158	-0.509716	-0.551187		1.152	-0.405456	-0.590086	-0.89134	-0.732868
1.153	-0.405973	1.01129	-0.50839	-0.550489		1.153	-0.405973	-0.590378	-0.891259	-0.733448
1.153	-0.407061	1.01081	-0.506681	-0.550631		1.153	-0.407061	-0.590503	-0.891882	-0.735426
1.154	-0.408446	1.0099	-0.505242	-0.550946		1.154	-0.408446	-0.590786	-0.891963	-0.737083
1.155	-0.409177	1.01016	-0.503125	-0.550647		1.155	-0.409177	-0.590935	-0.891865	-0.738876
1.155	-0.410163	1.00898	-0.50005	-0.550259		1.155	-0.410163	-0.590571	-0.892902	-0.740197
1.156	-0.409989	1.00851	-0.498511	-0.550369		1.156	-0.409989	-0.590572	-0.892761	-0.741172
1.157	-0.408524	1.00869	-0.498365	-0.550503		1.157	-0.408524	-0.59138	-0.892068	-0.742049
1.157	-0.407946	1.00852	-0.497823	-0.549937		1.157	-0.407946	-0.592894	-0.892327	-0.742798
1.158	-0.408386	1.00914	-0.496608	-0.549221		1.158	-0.408386	-0.59361	-0.891956	-0.743836
1.159	-0.409335	1.00924	-0.496113	-0.548397		1.159	-0.409335	-0.593715	-0.891465	-0.743895
1.159	-0.408299	1.00963	-0.497378	-0.548521		1.159	-0.408299	-0.593618	-0.891871	-0.743597
1.16	-0.407049	1.00992	-0.498002	-0.549169		1.16	-0.407049	-0.593191	-0.892501	-0.743796
1.161	-0.40761	1.01005	-0.498725	-0.548686		1.161	-0.40761	-0.593123	-0.89301	-0.744223
1.161	-0.407547	1.01024	-0.498658	-0.548031		1.161	-0.407547	-0.593494	-0.893466	-0.744496
1.162	-0.407622	1.01104	-0.498292	-0.547893		1.162	-0.407622	-0.593927	-0.893926	-0.74601
1.163	-0.406925	1.01147	-0.497637	-0.54707		1.163	-0.406925	-0.594858	-0.893208	-0.74786
1.163	-0.40569	1.01113	-0.496886	-0.546228		1.163	-0.40569	-0.596336	-0.892069	-0.749419
1.164	-0.405166	1.0107	-0.497186	-0.54649		1.164	-0.405166	-0.598004	-0.892064	-0.750403
1.165	-0.404732	1.01124	-0.497861	-0.547467		1.165	-0.404732	-0.599874	-0.890989	-0.750391
1.165	-0.404437	1.01155	-0.49813	-0.547844		1.165	-0.404437	-0.602674	-0.890027	-0.750693
1.166	-0.404821	1.01155	-0.496247	-0.547545		1.166	-0.404821	-0.603815	-0.889937	-0.751498
1.167	-0.405205	1.01168	-0.495273	-0.547841		1.167	-0.405205	-0.604567	-0.88985	-0.752572
1.167	-0.405134	1.01131	-0.4951	-0.547865		1.167	-0.405134	-0.604571	-0.889631	-0.754299
1.168	-0.405657	1.01142	-0.494624	-0.547307		1.168	-0.405657	-0.605105	-0.89091	-0.754986
1.169	-0.406322	1.0116	-0.494622	-0.546906		1.169	-0.406322	-0.606105	-0.891827	-0.755274
1.169	-0.40673	1.01182	-0.494775	-0.546914		1.169	-0.40673	-0.606875	-0.893072	-0.756472
1.17	-0.405645	1.01307	-0.494516	-0.547226		1.17	-0.405645	-0.607463	-0.893678	-0.757216
1.171	-0.405692	1.01378	-0.494166	-0.547241		1.171	-0.405692	-0.608179	-0.893545	-0.757944
1.171	-0.406863	1.01313	-0.493246	-0.547093		1.171	-0.406863	-0.608635	-0.89316	-0.758465
1.172	-0.406754	1.01371	-0.493098	-0.547157		1.172	-0.406754	-0.609203	-0.893631	-0.759195
1.173	-0.40576	1.0149	-0.493121	-0.545989		1.173	-0.40576	-0.610288	-0.894132	-0.758545
1.173	-0.404926	1.01592	-0.492594	-0.545187		1.173	-0.404926	-0.611231	-0.894527	-0.75819
1.174	-0.405162	1.01694	-0.492706	-0.545272		1.174	-0.405162	-0.611627	-0.894553	-0.757813
1.175	-0.405437	1.01767	-0.493538	-0.545495		1.175	-0.405437	-0.612	-0.893906	-0.757427
1.175	-0.405991	1.01855	-0.493872	-0.545085		1.175	-0.405991	-0.614017	-0.894011	-0.75471
1.176	-0.406476	1.0195	-0.493093	-0.543957		1.176	-0.406476	-0.615991	-0.894973	-0.753352
1.177	-0.405905	1.02077	-0.491944	-0.54244		1.177	-0.405905	-0.617831	-0.894586	-0.752028
1.177	-0.40623	1.02219	-0.491627	-0.540996		1.177	-0.40623	-0.619137	-0.894629	-0.751219
1.178	-0.408353	1.02294	-0.491235	-0.539923		1.178	-0.408353	-0.619955	-0.895079	-0.749188
1.179	-0.409109	1.02371	-0.490447	-0.538628		1.179	-0.409109	-0.62047	-0.896367	-0.748962
1.179	-0.410786	1.02509	-0.490018	-0.537474		1.179	-0.410786	-0.620952	-0.897621	-0.747545
1.18	-0.412231	1.02718	-0.488507	-0.537359		1.18	-0.412231	-0.621879	-0.898975	-0.747466
1.181	-0.412579	1.02941	-0.487849	-0.538118		1.181	-0.412579	-0.622745	-0.898823	-0.746402
1.181	-0.412237	1.03117	-0.48706	-0.53929		1.181	-0.412237	-0.624053	-0.900476	-0.745657
1.182	-0.410479	1.03212	-0.485396	-0.539558		1.182	-0.410479	-0.624778	-0.901665	-0.746506
1.183	-0.410668	1.03252	-0.484374	-0.538952		1.183	-0.410668	-0.624322	-0.901647	-0.747718
1.183	-0.41026	1.03349	-0.483022	-0.538254		1.183	-0.41026	-0.624556	-0.90087	-0.747568
1.184	-0.410466	1.03448	-0.484088	-0.537239		1.184	-0.410466	-0.625562	-0.901138	-0.748424
1.185	-0.409356	1.03501	-0.484453	-0.536539		1.185	-0.409356	-0.626666	-0.902608	-0.748638
1.185	-0.410597	1.03544	-0.485148	-0.536442		1.185	-0.410597	-0.626773	-0.9029	-0.749527
1.186	-0.410224	1.03621	-0.485112	-0.536834		1.186	-0.410224	-0.626486	-0.902747	-0.749382
1.187	-0.409461	1.038	-0.484918	-0.536763		1.187	-0.409461	-0.626967	-0.902785	-0.748308
1.187	-0.408816	1.03937	-0.485927	-0.536501		1.187	-0.408816	-0.627621	-0.902973	-0.748551
1.188	-0.407574	1.04004	-0.487519	-0.536304		1.188	-0.407574	-0.62791	-0.903546	-0.747567
1.189	-0.406478	1.04135	-0.489331	-0.534864		1.189	-0.406478	-0.628802	-0.90228	-0.747736
1.189	-0.407	1.04161	-0.489367	-0.533531		1.189	-0.407	-0.629779	-0.90149	-0.747534
1.19	-0.407284	1.04213	-0.48928	-0.53249		1.19	-0.407284	-0.629928	-0.900585	-0.747141
1.191	-0.407927	1.0425	-0.489675	-0.531335		1.191	-0.407927	-0.629821	-0.900516	-0.746887
1.191	-0.40828	1.04268	-0.490853	-0.53053		1.191	-0.40828	-0.629959	-0.900672	-0.746284
1.192	-0.406863	1.04359	-0.491064	-0.529532		1.192	-0.406863	-0.630018	-0.899538	-0.745992
1.193	-0.406427	1.04488	-0.489241	-0.528862		1.193	-0.406427	-0.630692	-0.898929	-0.746027
1.193	-0.406793	1.04631	-0.488939	-0.52739		1.193	-0.406793	-0.632322	-0.899523	-0.745379
1.194	-0.406177	1.04733	-0.488274	-0.526112		1.194	-0.406177	-0.633588	-0.899909	-0.745207
1.195	-0.405723	1.04791	-0.488593	-0.525047		1.195	-0.405723	-0.633929	-0.899517	-0.745834
1.195	-0.40512	1.04774	-0.488197	-0.523351		1.195	-0.40512	-0.633356	-0.899622	-0.745797
1.196	-0.405654	1.04844	-0.487598	-0.521909		1.196	-0.405654	-0.631649	-0.901744	-0.744503
1.197	-0.405651	1.05029	-0.487171	-0.521219		1.197	-0.405651	-0.629966	-0.903061	-0.742804
1.197	-0.405084	1.05259	-0.486471	-0.520505		1.197	-0.405084	-0.62866	-0.903826	-0.740663
1.198	-0.40384	1.05384	-0.4858	-0.518966		1.198	-0.40384	-0.62711	-0.903587	-0.739101
1.199	-0.40176	1.05467	-0.485888	-0.516611		1.199	-0.40176	-0.624703	-0.903506	-0.738455
1.199	-0.400417	1.05656	-0.485952	-0.515193		1.199	-0.400417	-0.623119	-0.902168	-0.737842
1.2	-0.400065	1.05829	-0.487011	-0.514031		1.2	-0.400065	-0.622778	-0.90211	-0.736931
1.201	-0.39923	1.06067	-0.486983	-0.512604		1.201	-0.39923	-0.622193	-0.901573	-0.735449
1.201	-0.397307	1.06372	-0.486595	-0.511489		1.201	-0.397307	-0.621335	-0.900217	-0.73347
1.202	-0.395906	1.06659	-0.485725	-0.508817		1.202	-0.395906	-0.620119	-0.898525	-0.731797
1.203	-0.393807	1.06889	-0.485062	-0.505962		1.203	-0.393807	-0.61996	-0.896701	-0.73001
1.203	-0.391491	1.07066	-0.484444	-0.502869		1.203	-0.391491	-0.619565	-0.894951	-0.726943
1.204	-0.389041	1.07234	-0.482945	-0.500711		1.204	-0.389041	-0.619211	-0.894295	-0.724108
1.205	-0.385224	1.07641	-0.48164	-0.498901		1.204	-0.385224	-0.618994	-0.893095	-0.721317
1.205	-0.38344	1.07963	-0.480818	-0.49626		1.205	-0.38344	-0.617949	-0.893175	-0.718944
1.206	-0.38179	1.08287	-0.479198	-0.494154		1.206	-0.38179	-0.615833	-0.89233	-0.717455
1.207	-0.379573	1.08579	-0.47635	-0.492588		1.206	-0.379573	-0.613444	-0.890786	-0.71666
1.207	-0.376621	1.0877	-0.473886	-0.489131		1.207	-0.376621	-0.611106	-0.889334	-0.716125
1.208	-0.372154	1.08937	-0.471539	-0.486768		1.208	-0.372154	-0.608839	-0.888207	-0.715163
1.209	-0.369696	1.09145	-0.468852	-0.484766		1.208	-0.369696	-0.606066	-0.886998	-0.714288
1.209	-0.367217	1.09494	-0.466388	-0.482982		1.209	-0.367217	-0.602655	-0.884131	-0.712253
1.21	-0.365456	1.09782	-0.464222	-0.480465		1.21	-0.365456	-0.599935	-0.882224	-0.710352
1.211	-0.36218	1.10054	-0.462498	-0.478055		1.21	-0.36218	-0.597792	-0.881314	-0.708455
1.211	-0.357633	1.10359	-0.459988	-0.476048		1.211	-0.357633	-0.595287	-0.880077	-0.706549
1.212	-0.35441	1.10624	-0.457482	-0.474393		1.212	-0.35441	-0.592958	-0.877632	-0.704326
1.213	-0.349718	1.10944	-0.455133	-0.472197		1.212	-0.349718	-0.591461	-0.875014	-0.702654
1.213	-0.345733	1.11226	-0.45276	-0.469805		1.213	-0.345733	-0.589124	-0.872863	-0.701181
1.214	-0.342184	1.11458	-0.450121	-0.466962		1.214	-0.342184	-0.58655	-0.871742	-0.698876
1.215	-0.338957	1.11767	-0.447342	-0.46367		1.214	-0.338957	-0.583681	-0.869046	-0.696193
1.215	-0.337195	1.12017	-0.445405	-0.460493		1.215	-0.337195	-0.580297	-0.865499	-0.693159
1.216	-0.334517	1.12369	-0.443489	-0.457285		1.216	-0.334517	-0.576884	-0.862321	-0.690315
1.217	-0.33236	1.12724	-0.441382	-0.454321		1.216	-0.33236	-0.573219	-0.85988	-0.688501
1.217	-0.329549	1.13115	-0.439178	-0.45199		1.217	-0.329549	-0.569529	-0.856918	-0.686752
1.218	-0.327598	1.13523	-0.436408	-0.449169		1.218	-0.327598	-0.565474	-0.852856	-0.685211
1.219	-0.324855	1.14031	-0.432762	-0.446246		1.218	-0.324855	-0.562273	-0.848841	-0.682649
1.219	-0.32286	1.14482	-0.430167	-0.442969		1.219	-0.32286	-0.559334	-0.845438	-0.680439
1.22	-0.321072	1.1489	-0.428892	-0.4392		1.22	-0.321072	-0.555947	-0.841552	-0.678243
1.221	-0.318034	1.15299	-0.426871	-0.435071		1.22	-0.318034	-0.553148	-0.838442	-0.675511
1.221	-0.314917	1.15778	-0.424563	-0.431573		1.221	-0.314917	-0.549876	-0.836307	-0.671771
1.222	-0.312216	1.16171	-0.422092	-0.428694		1.222	-0.312216	-0.546088	-0.834987	-0.667512
1.223	-0.30853	1.16612	-0.420274	-0.425159		1.222	-0.30853	-0.543197	-0.833557	-0.663695
1.223	-0.305691	1.17026	-0.417998	-0.42187		1.223	-0.305691	-0.540098	-0.83218	-0.659739
1.224	-0.302256	1.17434	-0.414773	-0.419011		1.224	-0.302256	-0.536493	-0.830201	-0.656225
1.225	-0.298881	1.1799	-0.411342	-0.416074		1.224	-0.298881	-0.532995	-0.827194	-0.653595
1.225	-0.296306	1.18406	-0.408466	-0.413264		1.225	-0.296306	-0.529624	-0.823892	-0.651168
1.226	-0.293713	1.18704	-0.406579	-0.409026		1.226	-0.293713	-0.526063	-0.820693	-0.648327
1.227	-0.290389	1.19116	-0.403992	-0.404986		1.226	-0.290389	-0.522414	-0.816796	-0.644942
1.227	-0.287378	1.19591	-0.401976	-0.402036		1.227	-0.287378	-0.519366	-0.812337	-0.642391
1.228	-0.283894	1.20036	-0.400421	-0.399087		1.228	-0.283894	-0.515927	-0.809006	-0.639286
1.229	-0.281032	1.20446	-0.3992	-0.396107		1.228	-0.281032	-0.512062	-0.805679	-0.635484
1.229	-0.277449	1.20812	-0.397701	-0.393007		1.229	-0.277449	-0.508456	-0.801585	-0.633058
1.23	-0.274958	1.21157	-0.395563	-0.389412		1.23	-0.274958	-0.505076	-0.798017	-0.63022
1.231	-0.271861	1.21576	-0.392855	-0.385347		1.23	-0.271861	-0.502404	-0.794979	-0.627623
1.231	-0.269249	1.21951	-0.389879	-0.381514		1.231	-0.269249	-0.500247	-0.792487	-0.624692
1.232	-0.267203	1.22325	-0.386732	-0.377858		1.232	-0.267203	-0.498056	-0.789236	-0.621481
1.233	-0.264923	1.22745	-0.383729	-0.373859		1.232	-0.264923	-0.496308	-0.786055	-0.619112
1.233	-0.261448	1.23155	-0.380398	-0.369703		1.233	-0.261448	-0.493744	-0.784071	-0.616254
1.234	-0.258128	1.2354	-0.377015	-0.365862		1.234	-0.258128	-0.49049	-0.781488	-0.613511
1.235	-0.256466	1.23852	-0.373763	-0.362825		1.234	-0.256466	-0.488275	-0.778571	-0.61082
1.235	-0.25502	1.24176	-0.371187	-0.360589		1.235	-0.25502	-0.486793	-0.776212	-0.608627
1.236	-0.253845	1.24467	-0.368009	-0.357633		1.236	-0.253845	-0.484778	-0.774486	-0.606183
1.237	-0.253079	1.24744	-0.365098	-0.355156		1.236	-0.253079	-0.482336	-0.772984	-0.604308
1.237	-0.251568	1.24991	-0.363352	-0.352568		1.237	-0.251568	-0.480261	-0.771116	-0.602043
1.238	-0.250278	1.25173	-0.362547	-0.349064		1.238	-0.250278	-0.477982	-0.769118	-0.60072
1.239	-0.248372	1.25327	-0.360493	-0.346878		1.238	-0.248372	-0.476315	-0.766179	-0.599111
1.239	-0.24465	1.25427	-0.359276	-0.343704		1.239	-0.24465	-0.474365	-0.762912	-0.597307
1.24	-0.24239	1.25554	-0.359359	-0.341181		1.24	-0.24239	-0.472094	-0.760019	-0.594877
1.241	-0.241038	1.25812	-0.358222	-0.339997		1.24	-0.241038	-0.470327	-0.757394	-0.592478
1.241	-0.240193	1.26159	-0.357624	-0.338237		1.241	-0.240193	-0.469205	-0.753852	-0.591072
1.242	-0.237782	1.26418	-0.357249	-0.335636		1.242	-0.237782	-0.46865	-0.75114	-0.589988
1.243	-0.2354	1.26565	-0.355986	-0.331941		1.242	-0.2354	-0.468062	-0.749263	-0.588748
1.243	-0.232125	1.26706	-0.354738	-0.330039		1.243	-0.232125	-0.466501	-0.748085	-0.586934
1.244	-0.229668	1.26781	-0.352788	-0.328537		1.244	-0.229668	-0.464473	-0.745737	-0.584912
1.245	-0.227321	1.2692	-0.351686	-0.32735		1.244	-0.227321	-0.463198	-0.743139	-0.58299
1.245	-0.224694	1.27111	-0.350931	-0.32574		1.245	-0.224694	-0.462394	-0.74124	-0.58085
1.246	-0.223011	1.27208	-0.349711	-0.325318		1.246	-0.223011	-0.460519	-0.739515	-0.578734
1.247	-0.221585	1.27319	-0.34919	-0.324271		1.246	-0.221585	-0.458752	-0.737184	-0.57624
1.247	-0.219304	1.27422	-0.349164	-0.322408		1.247	-0.219304	-0.45832	-0.733192	-0.574452
1.248	-0.217369	1.27481	-0.349017	-0.321745		1.248	-0.217369	-0.457496	-0.730978	-0.573518
1.249	-0.21457	1.27502	-0.349136	-0.321106		1.248	-0.21457	-0.456793	-0.729492	-0.572386
1.249	-0.211668	1.27708	-0.34866	-0.319843		1.249	-0.211668	-0.455453	-0.728113	-0.57082
1.25	-0.208698	1.27859	-0.348162	-0.318447		1.25	-0.208698	-0.455719	-0.726021	-0.568634
1.251	-0.20561	1.2793	-0.347653	-0.3172		1.25	-0.20561	-0.455132	-0.725124	-0.565548
1.251	-0.204234	1.28046	-0.347931	-0.315783		1.251	-0.204234	-0.454069	-0.724113	-0.561807
1.252	-0.202087	1.28037	-0.347935	-0.31437		1.252	-0.202087	-0.453005	-0.723245	-0.558847
1.253	-0.200065	1.28069	-0.346979	-0.312287		1.252	-0.200065	-0.451288	-0.722416	-0.557401
1.253	-0.198501	1.2823	-0.345863	-0.311698		1.253	-0.198501	-0.45096	-0.721478	-0.556617
1.254	-0.198411	1.28322	-0.344812	-0.311419		1.254	-0.198411	-0.450764	-0.719882	-0.555127
1.255	-0.198008	1.28295	-0.343588	-0.312038		1.254	-0.198008	-0.449918	-0.717786	-0.553133
1.255	-0.196392	1.28326	-0.34209	-0.311572		1.255	-0.196392	-0.450661	-0.715846	-0.552501
1.256	-0.193752	1.28364	-0.340562	-0.311381		1.256	-0.193752	-0.450103	-0.713955	-0.552188
1.257	-0.191963	1.28438	-0.339503	-0.312059		1.256	-0.191963	-0.44915	-0.711109	-0.552252
1.257	-0.191082	1.28567	-0.339168	-0.31197		1.257	-0.191082	-0.44935	-0.708476	-0.552351
1.258	-0.189073	1.28542	-0.339014	-0.311134		1.258	-0.189073	-0.448854	-0.706808	-0.552311
1.259	-0.186867	1.285	-0.337966	-0.310252		1.258	-0.186867	-0.448664	-0.70602	-0.551699
1.259	-0.185488	1.28466	-0.336585	-0.30975		1.259	-0.185488	-0.448784	-0.705222	-0.550575
1.26	-0.183477	1.28426	-0.335344	-0.310583		1.26	-0.183477	-0.449297	-0.703323	-0.55022
1.261	-0.182385	1.28296	-0.333654	-0.310919		1.26	-0.182385	-0.449216	-0.702373	-0.549371
1.261	-0.182059	1.28225	-0.331095	-0.310751		1.261	-0.182059	-0.449499	-0.701135	-0.548172
1.262	-0.180523	1.2815	-0.329304	-0.310588		1.262	-0.180523	-0.450393	-0.699388	-0.548151
1.263	-0.18008	1.28208	-0.328203	-0.31117		1.262	-0.18008	-0.451117	-0.697445	-0.54774
1.263	-0.179427	1.28167	-0.328005	-0.311447		1.263	-0.179427	-0.45178	-0.695771	-0.547304
1.264	-0.179679	1.28173	-0.327831	-0.312135		1.264	-0.179679	-0.451535	-0.69433	-0.54735
1.265	-0.179776	1.2803	-0.328095	-0.312969		1.264	-0.179776	-0.451459	-0.693681	-0.547312
1.265	-0.180592	1.27995	-0.328755	-0.314686		1.265	-0.180592	-0.452454	-0.693749	-0.547275
1.266	-0.181044	1.27844	-0.329419	-0.315709		1.266	-0.181044	-0.452399	-0.69348	-0.546103
1.267	-0.180873	1.27672	-0.329936	-0.316032		1.266	-0.180873	-0.451481	-0.692771	-0.544568
1.267	-0.18208	1.27501	-0.330012	-0.316571		1.267	-0.18208	-0.451934	-0.692193	-0.543653
1.268	-0.18174	1.27352	-0.3307	-0.318157		1.268	-0.18174	-0.452362	-0.691928	-0.543738
1.269	-0.181247	1.27186	-0.332076	-0.319528		1.268	-0.181247	-0.452775	-0.691482	-0.54428
1.269	-0.180936	1.2715	-0.333284	-0.32044		1.269	-0.180936	-0.452427	-0.691	-0.544732
1.27	-0.18015	1.27072	-0.335118	-0.321412		1.27	-0.18015	-0.451797	-0.69001	-0.545198
1.271	-0.181132	1.27012	-0.336233	-0.32214		1.27	-0.181132	-0.451187	-0.689001	-0.545494
1.271	-0.181335	1.26875	-0.336208	-0.322707		1.271	-0.181335	-0.451681	-0.688421	-0.5455
1.272	-0.181161	1.26828	-0.336568	-0.322367		1.272	-0.181161	-0.452627	-0.68903	-0.545489
1.273	-0.182489	1.26768	-0.337634	-0.322763		1.272	-0.182489	-0.453884	-0.689339	-0.545406
1.273	-0.183419	1.26716	-0.338114	-0.322599		1.273	-0.183419	-0.455365	-0.688459	-0.545158
1.274	-0.184231	1.26724	-0.339216	-0.322019		1.274	-0.184231	-0.456426	-0.688144	-0.545547
1.275	-0.185018	1.26644	-0.340492	-0.32185		1.274	-0.185018	-0.456539	-0.689024	-0.546572
1.275	-0.185836	1.26516	-0.341251	-0.323427		1.275	-0.185836	-0.455733	-0.690139	-0.547012
1.276	-0.186172	1.26427	-0.342261	-0.325028		1.276	-0.186172	-0.455607	-0.689658	-0.548152
1.277	-0.186059	1.26352	-0.343279	-0.325659		1.276	-0.186059	-0.456418	-0.68869	-0.549827
1.277	-0.186798	1.26327	-0.344465	-0.326003		1.277	-0.186798	-0.457224	-0.688893	-0.55077
1.278	-0.187745	1.26253	-0.345496	-0.326774		1.278	-0.187745	-0.457429	-0.689999	-0.552647
1.279	-0.189423	1.26206	-0.34633	-0.327465		1.278	-0.189423	-0.45679	-0.690769	-0.555005
1.279	-0.191661	1.26215	-0.348097	-0.327663		1.279	-0.191661	-0.456741	-0.691505	-0.557139
1.28	-0.193393	1.26107	-0.349627	-0.327811		1.28	-0.193393	-0.457211	-0.692405	-0.559203
1.281	-0.194659	1.25936	-0.350926	-0.326838		1.28	-0.194659	-0.457544	-0.693684	-0.561145
1.281	-0.195967	1.25912	-0.352669	-0.326367		1.281	-0.195967	-0.457745	-0.694802	-0.563833
1.282	-0.198673	1.25885	-0.353403	-0.326523		1.282	-0.198673	-0.458334	-0.695209	-0.566382
1.283	-0.20206	1.25685	-0.353268	-0.326716		1.282	-0.20206	-0.45881	-0.695412	-0.569308
1.283	-0.204792	1.25494	-0.354337	-0.32622		1.283	-0.204792	-0.458716	-0.695813	-0.572133
1.284	-0.20714	1.25419	-0.355584	-0.3255		1.284	-0.20714	-0.459065	-0.696396	-0.574985
1.285	-0.208274	1.25199	-0.356935	-0.325277		1.284	-0.208274	-0.459651	-0.697459	-0.57824
1.285	-0.209371	1.25063	-0.358909	-0.325665		1.285	-0.209371	-0.459307	-0.698359	-0.580326
1.286	-0.210425	1.24898	-0.361107	-0.326643		1.286	-0.210425	-0.460726	-0.699322	-0.581458
1.287	-0.210474	1.24643	-0.363276	-0.326893		1.286	-0.210474	-0.46124	-0.70075	-0.582704
1.287	-0.209866	1.24391	-0.365376	-0.326899		1.287	-0.209866	-0.461141	-0.702294	-0.58533
1.288	-0.210518	1.24149	-0.367525	-0.326244		1.288	-0.210518	-0.462926	-0.703754	-0.588056
1.289	-0.212047	1.23988	-0.369554	-0.326663		1.288	-0.212047	-0.463341	-0.705431	-0.590086
1.289	-0.213638	1.23812	-0.370668	-0.327827		1.289	-0.213638	-0.464328	-0.707435	-0.591879
1.29	-0.214925	1.23532	-0.371302	-0.327444		1.29	-0.214925	-0.463981	-0.7089	-0.593337
1.291	-0.216738	1.23368	-0.371298	-0.327017		1.29	-0.216738	-0.464104	-0.70997	-0.59408
1.291	-0.219436	1.23161	-0.371313	-0.32702		1.291	-0.219436	-0.465062	-0.711299	-0.59421
1.292	-0.221663	1.2301	-0.372572	-0.326743		1.292	-0.221663	-0.464987	-0.712717	-0.594613
1.292	-0.223008	1.2281	-0.373908	-0.327263		1.292	-0.223008	-0.467087	-0.713868	-0.595497
1.293	-0.22581	1.22636	-0.375009	-0.32682		1.293	-0.22581	-0.467078	-0.715456	-0.595725
1.294	-0.228324	1.22574	-0.376793	-0.32568		1.294	-0.228324	-0.467656	-0.717428	-0.596565
1.294	-0.230513	1.22491	-0.378787	-0.325974		1.294	-0.230513	-0.467558	-0.718429	-0.597721
1.295	-0.231686	1.22398	-0.380894	-0.327337		1.295	-0.231686	-0.468907	-0.719775	-0.59885
1.296	-0.233347	1.22203	-0.382957	-0.32628		1.296	-0.233347	-0.469167	-0.721518	-0.599955
1.296	-0.234787	1.22012	-0.384497	-0.327106		1.296	-0.234787	-0.470657	-0.722803	-0.600667
1.297	-0.235375	1.2179	-0.386689	-0.327617		1.297	-0.235375	-0.472258	-0.724152	-0.601443
1.298	-0.235318	1.21617	-0.388929	-0.328615		1.298	-0.235318	-0.471876	-0.72472	-0.602772
1.298	-0.234905	1.21356	-0.390527	-0.328615		1.298	-0.234905	-0.471638	-0.725313	-0.603133
1.299	-0.234784	1.21156	-0.392526	-0.328544		1.299	-0.234784	-0.472149	-0.727108	-0.603662
1.3	-0.235286	1.20965	-0.39508	-0.329143		1.3	-0.235286	-0.472747	-0.72844	-0.605338
1.3	-0.23505	1.20819	-0.397336	-0.330091		1.3	-0.23505	-0.473891	-0.729375	-0.606535
1.301	-0.2347	1.2075	-0.398865	-0.330159		1.301	-0.2347	-0.473872	-0.731632	-0.607279
1.302	-0.23456	1.2067	-0.400394	-0.329813		1.302	-0.23456	-0.473416	-0.734225	-0.608319
1.302	-0.234076	1.20491	-0.401444	-0.330988		1.302	-0.234076	-0.474473	-0.735948	-0.608866
1.303	-0.234878	1.20284	-0.402417	-0.331234		1.303	-0.234878	-0.475704	-0.73755	-0.608997
1.304	-0.235486	1.20082	-0.404034	-0.331045		1.304	-0.235486	-0.47752	-0.739472	-0.610236
1.304	-0.236485	1.1991	-0.405676	-0.331074		1.304	-0.236485	-0.477793	-0.741869	-0.61156
1.305	-0.237957	1.197	-0.407418	-0.331699		1.305	-0.237957	-0.478212	-0.742863	-0.612393
1.306	-0.238895	1.19415	-0.408818	-0.330668		1.306	-0.238895	-0.478577	-0.744369	-0.612993
1.306	-0.239652	1.19269	-0.409284	-0.331029		1.306	-0.239652	-0.47852	-0.746596	-0.614773
1.307	-0.239695	1.19026	-0.409788	-0.331964		1.307	-0.239695	-0.478391	-0.74803	-0.615408
1.308	-0.239914	1.18839	-0.410722	-0.333263		1.308	-0.239914	-0.47915	-0.748654	-0.614147
1.308	-0.240663	1.18785	-0.411629	-0.334836		1.308	-0.240663	-0.480111	-0.749045	-0.613606
1.309	-0.242076	1.18727	-0.412688	-0.335492		1.309	-0.242076	-0.480932	-0.750531	-0.613625
1.31	-0.243325	1.18622	-0.414409	-0.337016		1.31	-0.243325	-0.481368	-0.751912	-0.612155
1.31	-0.24396	1.18563	-0.416677	-0.338107		1.31	-0.24396	-0.482465	-0.752168	-0.611478
1.311	-0.245245	1.18617	-0.418919	-0.338102		1.311	-0.245245	-0.48295	-0.752484	-0.611425
1.312	-0.245536	1.18517	-0.420688	-0.338015		1.312	-0.245536	-0.484744	-0.752995	-0.610723
1.312	-0.245188	1.18325	-0.421747	-0.338229		1.312	-0.245188	-0.487542	-0.753244	-0.610333
1.313	-0.245133	1.18305	-0.423541	-0.338232		1.313	-0.245133	-0.488178	-0.753147	-0.610276
1.314	-0.245218	1.18262	-0.425329	-0.341334		1.314	-0.245218	-0.488238	-0.754323	-0.609607
1.314	-0.245743	1.18134	-0.426544	-0.342635		1.314	-0.245743	-0.489117	-0.755005	-0.60892
1.315	-0.24539	1.18182	-0.427042	-0.342655		1.315	-0.24539	-0.490265	-0.756006	-0.608083
1.316	-0.243879	1.18087	-0.429217	-0.343443		1.316	-0.243879	-0.492672	-0.757104	-0.607759
1.316	-0.242992	1.18133	-0.430024	-0.345431		1.316	-0.242992	-0.494386	-0.758567	-0.607309
1.317	-0.242931	1.17981	-0.431096	-0.346825		1.317	-0.242931	-0.495281	-0.760273	-0.607992
1.318	-0.24279	1.18069	-0.432471	-0.349398		1.318	-0.24279	-0.49712	-0.761974	-0.608609
1.318	-0.243007	1.18041	-0.433292	-0.350748		1.318	-0.243007	-0.498695	-0.764339	-0.609736
1.319	-0.243276	1.18041	-0.433419	-0.351078		1.319	-0.243276	-0.499162	-0.766125	-0.61079
1.32	-0.243336	1.1805	-0.432751	-0.352217		1.32	-0.243336	-0.500505	-0.767964	-0.610894
1.32	-0.243853	1.18139	-0.432276	-0.352701		1.32	-0.243853	-0.500953	-0.769815	-0.610407
1.321	-0.243504	1.18228	-0.432384	-0.353072		1.321	-0.243504	-0.501024	-0.771302	-0.610622
1.322	-0.243388	1.18193	-0.433477	-0.354794		1.322	-0.243388	-0.501298	-0.771869	-0.611487
1.322	-0.244015	1.18147	-0.436217	-0.354824		1.322	-0.244015	-0.501973	-0.77255	-0.611951
1.323	-0.245158	1.18154	-0.438736	-0.355519		1.323	-0.245158	-0.504019	-0.774511	-0.612585
1.324	-0.244724	1.17973	-0.441133	-0.357376		1.324	-0.244724	-0.504613	-0.777158	-0.613259
1.324	-0.244119	1.17986	-0.442996	-0.359601		1.324	-0.244119	-0.505228	-0.779562	-0.614111
1.325	-0.244565	1.17851	-0.444222	-0.362095		1.325	-0.244565	-0.50558	-0.78083	-0.615791
1.326	-0.244958	1.17989	-0.445211	-0.363987		1.326	-0.244958	-0.505359	-0.781253	-0.617024
1.326	-0.24505	1.1802	-0.447375	-0.365525		1.326	-0.24505	-0.505458	-0.782406	-0.617781
1.327	-0.245712	1.17993	-0.448504	-0.366828		1.327	-0.245712	-0.506614	-0.783146	-0.618919
1.328	-0.246438	1.18007	-0.449136	-0.368137		1.328	-0.246438	-0.507736	-0.784232	-0.619667
[truncated: 35,574 more rows]
