# Supplementary material for: Development and biophysical characterization of a humanized FSH–blocking monoclonal antibody therapeutic formulated at an ultra-high concentration
Source: eLife. 2023 Jun 19;12:e88898. doi: 10.7554/eLife.88898 (PMC10325703; doi:10.7554/eLife.88898)
Supplement: Figure 7—source data 1. [file elife-88898-fig7-data1.xlsx]

## Sheet: Figure 7
Figure 7: Determination of FSH binding to MS-Hu6 by Protein Thermal Shift Assay
MS-Hu6 in PBS (-) FSH						MS-Hu6 in PBS (+) FSH							Formulated MS-Hu6 (-) FSH						Formulated MS-Hu6 (+) FSH
Replicate 1		Replicate 2		Replicate 3		Replicate 1		Replicate 2		Replicate 3			Replicate 1		Replicate 2		Replicate 3		Replicate 1		Replicate 2		Replicate 3
Temp (°C)	dF/dT	Temp (°C)	dF/dT	Temp (°C)	dF/dT	Temp (°C)	dF/dT	Temp (°C)	dF/dT	Temp (°C)	dF/dT		Temp (°C)	dF/dT	Temp (°C)	dF/dT	Temp (°C)	dF/dT	Temp (°C)	dF/dT	Temp (°C)	dF/dT	Temp (°C)	dF/dT
28.3844	-212.059	28.3844	-237.957	28.3834	-71.7367	28.3834	-92.248	28.3862	-115.589	28.3862	-106.145		28.3818	-495.946	28.3818	-568.7	28.3856	-332.638	28.3856	-303.535	28.3837	-291.756	28.3837	-263.675
28.6842	-209.682	28.6842	-239.468	28.6838	-71.4032	28.6838	-88.3851	28.6866	-117.284	28.6866	-106.729		28.682	-497.308	28.682	-577.632	28.6862	-332.91	28.6862	-299.527	28.6845	-289.755	28.6845	-261.82
28.9839	-207.883	28.9839	-240.036	28.9841	-70.7722	28.9841	-84.9872	28.9868	-114.483	28.9868	-107.627		28.9823	-500.004	28.9823	-585.43	28.9867	-335.945	28.9867	-296.846	28.9851	-287.525	28.9851	-261.034
29.2834	-208.924	29.2834	-241.102	29.2842	-70.7692	29.2842	-79.7698	29.2865	-113.658	29.2865	-109.321		29.2824	-497.871	29.2824	-593.493	29.287	-335.507	29.287	-290.984	29.2854	-285.684	29.2854	-258.558
29.5828	-207.803	29.5828	-243.643	29.5845	-69.2499	29.5845	-76.9456	29.5861	-112.114	29.5861	-111.266		29.5826	-496.261	29.5826	-598.774	29.5873	-334.97	29.5873	-281.866	29.5855	-282.228	29.5855	-257.748
29.8823	-206.2	29.8823	-246.684	29.8849	-67.7605	29.8849	-72.9966	29.8856	-108.551	29.8856	-113.972		29.8827	-498.962	29.8827	-601.199	29.8875	-333.656	29.8875	-273.907	29.8854	-278.856	29.8854	-256.881
30.1817	-206.707	30.1817	-246.636	30.185	-66.6395	30.185	-70.4509	30.1852	-103.112	30.1852	-114.908		30.1829	-497.108	30.1829	-600.776	30.1876	-332.661	30.1876	-267.805	30.1853	-275.017	30.1853	-254.996
30.4812	-209.667	30.4812	-247.45	30.4851	-64.5319	30.4851	-68.0704	30.4849	-99.5382	30.4849	-115.587		30.483	-495.958	30.483	-597.969	30.4875	-331.726	30.4875	-258.789	30.4849	-271.052	30.4849	-253.815
30.7806	-212.566	30.7806	-248.059	30.7852	-62.8642	30.7852	-64.0481	30.7844	-97.061	30.7844	-115.125		30.783	-493.653	30.783	-597.875	30.7873	-328.638	30.7873	-255.971	30.7842	-267.029	30.7842	-249.392
31.0797	-214.968	31.0797	-247.464	31.085	-63.2833	31.085	-60.7167	31.0836	-95.1371	31.0836	-116.087		31.0826	-490.825	31.0826	-598.102	31.0865	-326.758	31.0865	-251.211	31.0829	-265.25	31.0829	-245.879
31.3785	-217.897	31.3785	-248.259	31.3844	-62.5559	31.3844	-58.3466	31.3826	-91.6104	31.3826	-116.226		31.3815	-486.073	31.3815	-596.089	31.3851	-326.517	31.3851	-248.284	31.3813	-264.296	31.3813	-243.294
31.677	-222.237	31.677	-249.367	31.6833	-63.1734	31.6833	-56.2773	31.6812	-87.1466	31.6812	-116.578		31.6799	-485.726	31.6799	-592.35	31.6834	-326.358	31.6834	-246.116	31.6793	-262.003	31.6793	-241.504
31.9752	-229.828	31.9752	-251.026	31.9817	-63.2408	31.9817	-55.7389	31.9795	-86.4495	31.9795	-116.707		31.9779	-486.868	31.9779	-592.712	31.9813	-325.059	31.9813	-247.315	31.9768	-260.652	31.9768	-239.394
32.273	-234.99	32.273	-253.149	32.2795	-62.6426	32.2795	-54.8991	32.2773	-83.6421	32.2773	-117.474		32.2754	-487.342	32.2754	-587.719	32.2787	-324.297	32.2787	-247.826	32.274	-257.213	32.274	-238.388
32.5707	-244.073	32.5707	-252.841	32.5771	-61.4614	32.5771	-53.7425	32.5751	-80.7569	32.5751	-116.32		32.5728	-487.108	32.5728	-583.693	32.5761	-322.25	32.5761	-251.162	32.5711	-253.469	32.5711	-234.306
32.8685	-250.824	32.8685	-252.921	32.8747	-60.3349	32.8747	-51.4751	32.873	-79.2916	32.873	-114.943		32.8703	-486.801	32.8703	-581.021	32.8735	-320.164	32.8735	-248.508	32.8685	-250.181	32.8685	-231.846
33.1665	-257.069	33.1665	-254.844	33.1724	-59.688	33.1724	-48.7149	33.1706	-78.2245	33.1706	-114.868		33.1677	-486.744	33.1677	-578.096	33.1709	-319.276	33.1709	-245.4	33.166	-247.253	33.166	-228.568
33.4646	-261.406	33.4646	-255.248	33.4701	-58.6976	33.4701	-47.0824	33.468	-77.1899	33.468	-115.224		33.4653	-487.441	33.4653	-575.688	33.4686	-319.916	33.4686	-242.632	33.4637	-245.387	33.4637	-222.918
33.7632	-264.15	33.7632	-256.264	33.7678	-57.9532	33.7678	-46.8113	33.7655	-75.4383	33.7655	-115.389		33.7633	-488.17	33.7633	-573.043	33.7666	-318.978	33.7666	-239.74	33.7621	-242.426	33.7621	-220.792
34.0624	-267.843	34.0624	-256.047	34.0659	-57.1155	34.0659	-48.2467	34.0634	-72.8204	34.0634	-114.51		34.0619	-487.818	34.0619	-568.85	34.0654	-319.269	34.0654	-238.25	34.0612	-239.296	34.0612	-218.803
34.3622	-269.212	34.3622	-254.573	34.3649	-56.9323	34.3649	-48.0555	34.3619	-70.3051	34.3619	-115.432		34.3614	-487.798	34.3614	-566.188	34.365	-318.444	34.365	-234.069	34.3611	-234.463	34.3611	-216.5
34.6625	-273.176	34.6625	-253.967	34.6645	-54.9746	34.6645	-47.5262	34.6612	-70.812	34.6612	-114.142		34.6616	-482.306	34.6616	-562.887	34.6651	-317.99	34.6651	-232.685	34.6616	-231.746	34.6616	-212.047
34.9635	-271.345	34.9635	-253.33	34.965	-53.7965	34.965	-45.9866	34.9614	-68.4663	34.9614	-113.392		34.9622	-479.713	34.9622	-558.187	34.9658	-315.773	34.9658	-226.409	34.9629	-228.291	34.9629	-207.975
35.2654	-273.108	35.2654	-250.777	35.2666	-52.2555	35.2666	-45.7233	35.2627	-67.3691	35.2627	-113.269		35.2637	-474.659	35.2637	-556.677	35.2673	-316.274	35.2673	-221.173	35.265	-224.888	35.265	-204.193
35.568	-269.372	35.568	-250.983	35.569	-51.9843	35.569	-43.9529	35.5647	-67.2964	35.5647	-113.825		35.566	-469.074	35.566	-555.041	35.5693	-316.52	35.5693	-213.751	35.5678	-222.161	35.5678	-201.484
35.871	-268.666	35.871	-251.242	35.8719	-51.6681	35.8719	-44.3106	35.8672	-66.9985	35.8672	-115.017		35.8687	-464.234	35.8687	-553.055	35.8718	-317.105	35.8718	-209.446	35.871	-219.581	35.871	-197.042
36.1741	-267.768	36.1741	-251.954	36.1751	-50.7391	36.1751	-45.3133	36.1701	-67.4851	36.1701	-115.503		36.1717	-461.663	36.1717	-550.527	36.1744	-316.752	36.1744	-206.648	36.1744	-216.498	36.1744	-194.343
36.4773	-265.305	36.4773	-253.289	36.4786	-49.9429	36.4786	-44.7271	36.4735	-66.6977	36.4735	-117.037		36.4749	-459.409	36.4749	-549.694	36.4771	-315.244	36.4771	-205.54	36.478	-211.3	36.478	-193.933
36.7802	-263.883	36.7802	-253.404	36.782	-49.8538	36.782	-44.3058	36.7767	-65.4381	36.7767	-117.174		36.7779	-454.837	36.7779	-548.227	36.7796	-316.147	36.7796	-201.944	36.7812	-208.967	36.7812	-191.398
37.083	-261.179	37.083	-255.493	37.0853	-49.2076	37.0853	-42.2577	37.08	-65.2208	37.08	-117.767		37.0808	-452.611	37.0808	-545.877	37.0819	-315.711	37.0819	-198.388	37.0842	-206.023	37.0842	-188.699
37.3855	-261.855	37.3855	-258.065	37.3882	-48.9834	37.3882	-40.7098	37.383	-65.5079	37.383	-118.769		37.3833	-447.536	37.3833	-543.066	37.3839	-315.124	37.3839	-196.74	37.3868	-204.866	37.3868	-185.698
37.6878	-257.68	37.6878	-260.53	37.6908	-48.3353	37.6908	-39.2162	37.6857	-64.2839	37.6857	-120.901		37.6857	-446.17	37.6857	-542.245	37.6857	-314.339	37.6857	-188.055	37.6891	-199.254	37.6891	-184.487
37.9901	-255.509	37.9901	-261.491	37.9932	-47.8359	37.9932	-39.0446	37.9883	-64.4319	37.9883	-120.997		37.9881	-439.514	37.9881	-538.4	37.9875	-314.041	37.9875	-184.256	37.9912	-196.622	37.9912	-181.767
38.2922	-249.777	38.2922	-264.684	38.2953	-48.0405	38.2953	-37.7043	38.2906	-63.8576	38.2906	-121.272		38.2904	-437.796	38.2904	-534.424	38.2894	-311.131	38.2894	-180.542	38.2932	-196.03	38.2932	-179.111
38.5939	-248.16	38.5939	-265.701	38.5971	-46.9256	38.5971	-37.1624	38.5925	-61.6991	38.5925	-120.624		38.5924	-434.895	38.5924	-530	38.5909	-308.672	38.5909	-178.297	38.5949	-193.71	38.5949	-176.259
38.895	-242.593	38.895	-266.642	38.8983	-45.9075	38.8983	-36.306	38.8938	-60.1253	38.8938	-120.211		38.8938	-430.849	38.8938	-525.21	38.892	-305.956	38.892	-175.807	38.896	-190.33	38.896	-175.251
39.1959	-236.343	39.1959	-266.024	39.1991	-46.043	39.1991	-34.3053	39.1948	-58.0185	39.1948	-119.025		39.1949	-423.705	39.1949	-521.262	39.1928	-303.462	39.1928	-171.87	39.1967	-186.38	39.1967	-173.575
39.4968	-231.861	39.4968	-262.675	39.4999	-45.5591	39.4999	-32.5529	39.4958	-56.7725	39.4958	-116.451		39.4959	-416.149	39.4959	-514.789	39.4937	-299.541	39.4937	-166.028	39.4975	-185.522	39.4975	-169.135
39.7976	-229.469	39.7976	-261.195	39.8006	-44.6099	39.8006	-31.2024	39.7968	-56.8977	39.7968	-117.346		39.7968	-409.715	39.7968	-507.849	39.7945	-295.699	39.7945	-162.485	39.7982	-182.568	39.7982	-166.015
40.0981	-225.668	40.0981	-258.045	40.101	-43.4067	40.101	-29.6218	40.0974	-56.0108	40.0974	-116.872		40.0973	-403.355	40.0973	-501.76	40.0951	-289.147	40.0951	-159.185	40.0985	-178.444	40.0985	-162.02
40.3984	-218.497	40.3984	-255.344	40.4013	-41.5497	40.4013	-29.1953	40.3978	-54.8422	40.3978	-115.067		40.3977	-398.085	40.3977	-492.975	40.3956	-284.948	40.3956	-153.65	40.3988	-174.366	40.3988	-159.599
40.6988	-213.845	40.6988	-251.711	40.7016	-40.6314	40.7016	-29.3044	40.6983	-52.8491	40.6983	-113.311		40.6981	-391.322	40.6981	-484.064	40.6962	-280.165	40.6962	-154.964	40.6992	-173.427	40.6992	-155.047
40.9988	-210.979	40.9988	-249.881	41.0017	-40.1646	41.0017	-27.0578	40.9984	-51.8045	40.9984	-114.82		40.9982	-386.615	40.9982	-478.392	40.9965	-275.345	40.9965	-152.173	40.9994	-168.949	40.9994	-152.979
41.2986	-207.895	41.2986	-245.686	41.3015	-39.0035	41.3015	-27.0686	41.2983	-51.2777	41.2983	-113.537		41.2979	-379.883	41.2979	-470.607	41.2965	-270.752	41.2965	-147.889	41.2992	-163.267	41.2992	-150.056
41.5984	-203.08	41.5984	-242.524	41.6011	-38.2618	41.6011	-27.027	41.5981	-51.401	41.5981	-113.788		41.5975	-375.575	41.5975	-464.592	41.5964	-265.229	41.5964	-144.941	41.599	-157.441	41.599	-147.45
41.8984	-201.039	41.8984	-238.188	41.9011	-38.5888	41.9011	-24.9744	41.8982	-51.5383	41.8982	-113.62		41.8974	-368.674	41.8974	-457.269	41.8966	-259.192	41.8966	-144.577	41.899	-151.998	41.899	-142.772
42.1985	-199.335	42.1985	-233.812	42.2012	-35.8066	42.2012	-25.5057	42.1985	-51.2112	42.1985	-114.58		42.1975	-364.154	42.1975	-446.28	42.1969	-253.281	42.1969	-142.676	42.1991	-149.887	42.1991	-138.715
42.4984	-197.762	42.4984	-231.651	42.5011	-35.1421	42.5011	-25.8157	42.4984	-49.934	42.4984	-115.706		42.4973	-360.609	42.4973	-437.698	42.4969	-249.067	42.4969	-140.07	42.499	-145.909	42.499	-136.005
42.7983	-191.261	42.7983	-228.345	42.8009	-34.9579	42.8009	-25.6774	42.7982	-48.8821	42.7982	-114.664		42.7971	-356.613	42.7971	-428.41	42.7969	-242.573	42.7969	-137.114	42.7988	-141.958	42.7988	-132.64
43.0986	-186.109	43.0986	-225.663	43.1011	-34.0328	43.1011	-25.9187	43.0985	-47.8143	43.0985	-115.162		43.0973	-350.807	43.0973	-419.373	43.0971	-239.73	43.0971	-132.135	43.099	-139.588	43.099	-130.431
43.3989	-183.05	43.3989	-221.549	43.4014	-33.8187	43.4014	-24.9451	43.399	-47.2789	43.399	-116.546		43.3976	-347.042	43.3976	-413.364	43.3974	-231.899	43.3974	-129.778	43.3993	-136.477	43.3993	-126.153
43.6992	-180.874	43.6992	-216.647	43.7019	-33.4548	43.7019	-23.4676	43.6995	-46.7338	43.6995	-117.735		43.6981	-343.197	43.6981	-406.878	43.6977	-226.154	43.6977	-127.433	43.6997	-131.528	43.6997	-125.249
43.9996	-175.942	43.9996	-211.72	44.0023	-31.8633	44.0023	-24.0274	44.0001	-45.1474	44.0001	-117.178		43.9986	-338.179	43.9986	-396.69	43.998	-219.907	43.998	-125.265	44	-130.045	44	-122.803
44.3	-172.838	44.3	-208.395	44.3029	-30.5172	44.3029	-22.1297	44.3007	-43.1665	44.3007	-119.02		44.2992	-331.292	44.2992	-387.895	44.2984	-213.888	44.2984	-123.928	44.3004	-126.447	44.3004	-120.41
44.6004	-168.518	44.6004	-204.003	44.6034	-30.0337	44.6034	-20.9888	44.6013	-41.2907	44.6013	-119.805		44.5998	-325.894	44.5998	-377.041	44.5988	-209.62	44.5988	-119.786	44.6008	-126.09	44.6008	-118.141
44.9005	-164.111	44.9005	-201.346	44.9035	-27.3522	44.9035	-20.8063	44.9015	-39.2111	44.9015	-120.866		44.9001	-322.859	44.9001	-367.013	44.8988	-205.279	44.8988	-113.295	44.9009	-127.32	44.9009	-117.623
45.2003	-159.819	45.2003	-199.267	45.2033	-28.3596	45.2033	-18.7089	45.2014	-37.6449	45.2014	-120.725		45.2001	-317.786	45.2001	-360.967	45.1985	-198.848	45.1985	-110.852	45.2008	-124.218	45.2008	-115.1
45.5002	-154.526	45.5002	-197.094	45.5033	-27.5824	45.5033	-17.9328	45.5016	-37.4327	45.5016	-120.593		45.5003	-311.756	45.5003	-352.599	45.4984	-192.917	45.4984	-108.771	45.5008	-121.795	45.5008	-113.444
45.8002	-154.388	45.8002	-194.435	45.8033	-25.7291	45.8033	-16.3859	45.8017	-36.3506	45.8017	-121.906		45.8005	-306.508	45.8005	-346.295	45.7982	-187.538	45.7982	-107.93	45.8008	-119.247	45.8008	-112.232
46.0999	-153.265	46.0999	-190.764	46.103	-24.8806	46.103	-15.0132	46.1015	-35.2201	46.1015	-121.794		46.1004	-300.751	46.1004	-337.521	46.0979	-181.654	46.0979	-109.412	46.1004	-117	46.1004	-110.872
46.3995	-150.672	46.3995	-188.351	46.4026	-23.2625	46.4026	-14.304	46.4012	-34.0357	46.4012	-119.817		46.4003	-293.081	46.4003	-327.015	46.3975	-179.062	46.3975	-110.684	46.4	-115.195	46.4	-110.423
46.699	-147.305	46.699	-187.266	46.7021	-21.328	46.7021	-13.3059	46.7007	-33.0288	46.7007	-119.547		46.6999	-285.64	46.6999	-315.938	46.697	-173.752	46.697	-106.603	46.6995	-115.733	46.6995	-106.493
46.9985	-145.393	46.9985	-185.29	47.0014	-21.0812	47.0014	-11.9263	47.0003	-31.9856	47.0003	-119.092		46.9995	-281.854	46.9995	-307.197	46.9966	-169.015	46.9966	-101.923	46.999	-112.575	46.999	-103.476
47.2982	-142.936	47.2982	-181.955	47.3008	-20.4475	47.3008	-10.9254	47.2999	-32.0022	47.2999	-117.957		47.2991	-278.745	47.2991	-298.848	47.2962	-163.924	47.2962	-100.75	47.2986	-111.561	47.2986	-100.701
47.5978	-142.536	47.5978	-179.955	47.6004	-19.2447	47.6004	-10.1972	47.5995	-31.8423	47.5995	-117.194		47.5988	-270.818	47.5988	-289.459	47.596	-157.087	47.596	-100.896	47.5983	-109.956	47.5983	-98.3752
47.8976	-141.997	47.8976	-176.623	47.9001	-18.1242	47.9001	-9.76685	47.8994	-31.5625	47.8994	-115.29		47.8986	-263.011	47.8986	-281.968	47.8959	-150.333	47.8959	-103.372	47.8982	-106.471	47.8982	-94.6612
48.1976	-139.594	48.1976	-172.923	48.2002	-16.3953	48.2002	-8.60082	48.1995	-31.6302	48.1995	-114.355		48.1986	-258.87	48.1986	-272.141	48.196	-146.961	48.196	-98.4189	48.1982	-105.485	48.1982	-92.581
48.4977	-139.374	48.4977	-168.735	48.5004	-14.3395	48.5004	-7.31	48.4995	-30.0318	48.4995	-113.882		48.4987	-251.109	48.4987	-264.096	48.4963	-140.295	48.4963	-97.9625	48.4984	-103.728	48.4984	-90.5794
48.798	-135.448	48.798	-165.039	48.8007	-14.1232	48.8007	-5.77736	48.7998	-28.2722	48.7998	-111.122		48.7989	-244.482	48.7989	-253.43	48.7968	-135.834	48.7968	-93.3923	48.7987	-103.117	48.7987	-87.1901
49.0985	-132.821	49.0985	-162.348	49.1013	-13.1725	49.1013	-4.96657	49.1003	-28.2925	49.1003	-109.821		49.0993	-238.49	49.0993	-245.668	49.0974	-128.942	49.0974	-88.2689	49.0993	-101.155	49.0993	-83.9058
49.3989	-132.389	49.3989	-158.591	49.4019	-13.3333	49.4019	-4.42193	49.4007	-28.6015	49.4007	-110.772		49.3995	-235.535	49.3995	-239.221	49.3979	-122.206	49.3979	-81.847	49.3997	-99.4687	49.3997	-81.4514
49.6992	-128.964	49.6992	-153.922	49.7024	-11.324	49.7024	-4.321	49.7009	-28.439	49.7009	-108.249		49.6997	-231.029	49.6997	-234.207	49.6982	-116.577	49.6982	-80.5481	49.7001	-96.4108	49.7001	-80.4852
49.9995	-125.383	49.9995	-148.711	50.0029	-9.70295	50.0029	-2.72358	50.0011	-27.5132	50.0011	-105.498		49.9998	-222.145	49.9998	-227.469	49.9984	-111.292	49.9984	-83.3053	50.0004	-95.0612	50.0004	-78.6313
50.2995	-122.579	50.2995	-145.059	50.3032	-7.89613	50.3032	-1.33136	50.3012	-26.2032	50.3012	-103.924		50.2997	-213.497	50.2997	-220.195	50.2985	-106.944	50.2985	-82.6088	50.3004	-93.8157	50.3004	-76.8257
50.5995	-118.891	50.5995	-139.563	50.6033	-5.23539	50.6033	0.657289	50.6011	-25.8252	50.6011	-102.158		50.5996	-210.382	50.5996	-216.098	50.5983	-102.508	50.5983	-81.8682	50.6003	-90.5204	50.6003	-74.6546
50.8993	-114.355	50.8993	-134.45	50.9034	-4.96555	50.9034	1.90926	50.9007	-24.1136	50.9007	-100.956		50.8993	-203.899	50.8993	-210.204	50.898	-98.75	50.898	-74.7295	50.9001	-89.0032	50.9001	-72.8979
51.1991	-110.197	51.1991	-128.986	51.2032	-2.18532	51.2032	1.36067	51.1999	-22.1097	51.1999	-98.8733		51.199	-195.895	51.199	-205.687	51.1974	-92.5064	51.1974	-77.4537	51.1997	-85.7707	51.1997	-71.3127
51.4987	-104.724	51.4987	-124.192	51.5029	-1.03737	51.5029	1.83161	51.4991	-21.9596	51.4991	-96.7916		51.4986	-191.06	51.4986	-201.201	51.4968	-90.0189	51.4968	-73.3036	51.4992	-83.6603	51.4992	-68.3443
51.7981	-102.136	51.7981	-118.9	51.8023	2.34798	51.8023	1.63976	51.7979	-21.6746	51.7979	-95.7884		51.798	-185.072	51.798	-197.7	51.7959	-85.1887	51.7959	-72.4275	51.7985	-81.0808	51.7985	-67.4562
52.0974	-96.2544	52.0974	-113.786	52.1016	5.68961	52.1016	2.37215	52.0967	-19.1124	52.0967	-94.4042		52.0972	-179.912	52.0972	-194.035	52.0949	-81.7107	52.0949	-73.0762	52.0976	-79.0617	52.0976	-65.7351
52.3969	-88.686	52.3969	-109.065	52.401	10.5128	52.401	3.76974	52.3957	-15.8368	52.3957	-91.2351		52.3968	-169.945	52.3968	-188.96	52.3941	-77.3992	52.3941	-73.4943	52.3971	-75.7875	52.3971	-62.3333
52.6967	-85.0577	52.6967	-104.443	52.7007	11.6409	52.7007	5.27843	52.695	-13.2317	52.695	-90.724		52.6968	-162.543	52.6968	-183.456	52.6937	-72.0165	52.6937	-72.2275	52.6968	-72.3238	52.6968	-60.118
52.9966	-81.3557	52.9966	-100.841	53.0005	15.8584	53.0005	4.77198	52.9944	-12.6824	52.9944	-90.8913		52.9967	-155.816	52.9967	-179.857	52.9935	-66.641	52.9935	-66.0544	52.9965	-68.6677	52.9965	-58.4987
53.2964	-75.5473	53.2964	-95.6835	53.3003	18.9117	53.3003	3.88859	53.2937	-11.3507	53.2937	-88.5168		53.2967	-152.275	53.2967	-177.093	53.2933	-60.4204	53.2933	-60.832	53.2963	-65.7299	53.2963	-56.2442
53.5962	-69.1866	53.5962	-92.1062	53.6	21.2324	53.6	3.18273	53.5931	-9.44341	53.5931	-86.6991		53.5967	-142.146	53.5967	-171.68	53.5931	-55.6028	53.5931	-55.4315	53.5962	-64.0131	53.5962	-53.8596
53.8962	-63.1386	53.8962	-88.4059	53.8999	24.7126	53.8999	2.56575	53.8931	-10.1123	53.8931	-84.9745		53.897	-137.487	53.897	-165.356	53.8932	-50.5968	53.8932	-57.5358	53.8963	-59.7949	53.8963	-51.2724
54.1964	-58.8903	54.1964	-84.9324	54.2	28.1616	54.2	3.972	54.1939	-9.70947	54.1939	-84.917		54.1974	-130.336	54.1974	-159.454	54.1937	-45.627	54.1937	-51.295	54.1966	-57.0417	54.1966	-48.4844
54.4967	-52.4916	54.4967	-80.3985	54.5002	32.6886	54.5002	4.40791	54.4947	-7.72501	54.4947	-83.0432		54.4979	-123.593	54.4979	-152.334	54.4942	-38.2068	54.4942	-49.069	54.4969	-52.9833	54.4969	-46.5206
54.797	-45.0801	54.797	-76.4258	54.8005	36.7293	54.8005	4.78509	54.7956	-6.83303	54.7956	-81.6256		54.7985	-116.349	54.7985	-144.994	54.7948	-31.3507	54.7948	-46.6193	54.7974	-48.2994	54.7974	-42.3395
55.0972	-41.7925	55.0972	-71.122	55.1007	39.2958	55.1007	5.45278	55.0966	-7.30489	55.0966	-79.2286		55.0991	-107.461	55.0991	-136.408	55.0954	-25.3988	55.0954	-40.8658	55.0978	-44.1063	55.0978	-39.515
55.3974	-38.1306	55.3974	-65.8165	55.4008	40.9262	55.4008	6.26133	55.3974	-7.80657	55.3974	-77.0946		55.3994	-100.78	55.3994	-127.662	55.3959	-19.1639	55.3959	-34.1524	55.398	-40.1722	55.398	-37.8863
55.6973	-31.3321	55.6973	-59.7169	55.7007	44.8528	55.7007	6.1818	55.698	-6.65447	55.698	-74.2378		55.6995	-92.9964	55.6995	-118.037	55.696	-13.2718	55.696	-26.04	55.6981	-34.9213	55.6981	-33.6083
55.9971	-22.3344	55.9971	-52.1128	56.0005	46.016	56.0005	7.67263	55.9985	-4.6966	55.9985	-70.1479		55.9996	-85.6335	55.9996	-106.726	55.996	-6.91633	55.996	-20.6466	55.9981	-30.5576	55.9981	-27.916
56.2969	-14.5583	56.2969	-45.3038	56.3001	49.7024	56.3001	9.1377	56.299	-2.43172	56.299	-67.9586		56.2996	-72.6313	56.2996	-93.2561	56.2959	-0.52832	56.2959	-14.6155	56.2982	-24.095	56.2982	-23.2893
56.5967	-6.83004	56.5967	-36.1924	56.5998	52.7857	56.5998	11.4362	56.5994	0.815574	56.5994	-65.0645		56.5995	-62.079	56.5995	-79.8529	56.5958	8.62949	56.5958	-5.55488	56.5982	-16.0002	56.5982	-18.3894
56.8966	2.0575	56.8966	-25.4793	56.8997	56.7848	56.8997	14.9266	56.8997	6.03525	56.8997	-61.1723		56.8995	-46.6799	56.8995	-66.2454	56.8958	19.7458	56.8958	6.20148	56.8983	-8.72912	56.8983	-13.1535
57.1964	12.9637	57.1964	-13.1965	57.1994	58.4088	57.1994	17.2824	57.1996	10.1267	57.1996	-54.9897		57.1992	-29.7495	57.1992	-49.4989	57.1956	30.8889	57.1956	14.8602	57.1983	0.287523	57.1983	-6.12386
57.4961	24.2527	57.4961	0.221169	57.4991	59.6137	57.4991	20.4622	57.4993	14.2383	57.4993	-49.9715		57.4988	-11.7484	57.4988	-31.3211	57.4953	42.1755	57.4953	28.0804	57.4982	10.6294	57.4982	2.7479
57.7959	37.1611	57.7959	15.3699	57.7988	60.2556	57.7988	23.9305	57.7991	19.2165	57.7991	-43.816		57.7984	8.06032	57.7984	-10.7375	57.795	54.3995	57.795	42.2582	57.7981	21.9806	57.7981	10.4871
58.0957	55.2036	58.0957	31.7082	58.0985	62.4016	58.0985	27.2076	58.099	26.1651	58.099	-37.156		58.098	30.8563	58.098	11.701	58.0949	70.1644	58.0949	55.7244	58.0981	34.9866	58.0981	22.5293
58.3956	74.5432	58.3956	50.8881	58.3983	64.6232	58.3983	29.8782	58.3987	33.584	58.3987	-30.6632		58.3975	57.4699	58.3975	36.0581	58.3948	87.9391	58.3948	69.4816	58.3981	49.7747	58.3981	35.7714
58.6956	94.1583	58.6956	70.3324	58.6981	66.2321	58.6981	34.5427	58.6985	38.7985	58.6985	-24.0777		58.6971	87.7863	58.6971	64.7474	58.6948	107.269	58.6948	83.9399	58.698	64.16	58.698	49.9114
58.9956	113.78	58.9956	92.0069	58.9979	68.936	58.9979	39.2486	58.9984	46.8034	58.9984	-17.1826		58.9966	122.475	58.9966	96.3138	58.9949	130.373	58.9949	101.064	58.9978	83.1579	58.9978	64.9404
59.2958	137.821	59.2958	117.893	59.2979	69.3364	59.2979	44.3713	59.2985	55.3983	59.2985	-8.4686		59.2964	157.932	59.2964	131.475	59.2951	155.933	59.2951	122.577	59.2978	103.752	59.2978	83.4604
59.5961	166.386	59.5961	145.083	59.5981	71.5854	59.5981	48.9244	59.5987	64.4339	59.5987	2.53364		59.5963	199.236	59.5963	171.808	59.5955	183.828	59.5955	140.648	59.5977	126.207	59.5977	105.387
59.8963	197.58	59.8963	176.546	59.898	72.818	59.898	53.1963	59.8987	74.6411	59.8987	14.7604		59.8961	246.068	59.8961	217.7	59.8956	214.194	59.8956	164.405	59.8975	151.951	59.8975	131.132
60.1964	232.805	60.1964	210.421	60.1978	76.1181	60.1978	59.0305	60.1987	86.4775	60.1987	26.3262		60.1958	297.197	60.1958	268.037	60.1956	248.584	60.1956	192.181	60.1973	179.992	60.1973	159.306
60.4964	270.532	60.4964	248.469	60.4977	80.8166	60.4977	65.5837	60.4987	99.6551	60.4987	39.6456		60.4957	357.163	60.4957	324.432	60.4956	288.951	60.4956	219.5	60.4969	210.785	60.4969	190.945
60.7958	315.885	60.7958	293.998	60.797	86.1718	60.797	74.2313	60.7982	114.744	60.7982	54.9062		60.7952	426.855	60.7952	388.149	60.7952	334.892	60.7952	252.349	60.7962	246.634	60.7962	229.895
61.0948	364.061	61.0948	344.262	61.096	92.6795	61.096	83.223	61.0973	130.144	61.0973	71.4811		61.0946	500.303	61.0946	458.835	61.0944	385.706	61.0944	293.504	61.0952	287.14	61.0952	270.69
61.3937	419.126	61.3937	400.225	61.3949	101.099	61.3949	94.3267	61.3963	148.553	61.3963	91.1796		61.394	583.879	61.394	538.814	61.3937	441.756	61.3937	336.872	61.3943	333.027	61.3943	319.476
61.6925	482.01	61.6925	465.067	61.6938	110.366	61.6938	106.122	61.6951	170.882	61.6951	115.14		61.6934	677.685	61.6934	626.575	61.6927	506.473	61.6927	389.241	61.6932	385.82	61.6932	372.958
61.9912	553.689	61.9912	535.902	61.9926	122.531	61.9926	118.524	61.9939	193.474	61.9939	140.18		61.9926	783.131	61.9926	726.002	61.9915	578.064	61.9915	447.559	61.9922	442.981	61.9922	433.712
62.2899	630.609	62.2899	614.013	62.2914	136.315	62.2914	133.759	62.2927	218.041	62.2927	169.493		62.2919	902.351	62.2919	836.719	62.2905	659.297	62.2905	509.309	62.2912	507.873	62.2912	501.066
62.5887	716.447	62.5887	703.198	62.5904	152.168	62.5904	150.846	62.5915	246.226	62.5915	199.204		62.5912	1035.57	62.5912	959.581	62.5894	750.474	62.5894	588.33	62.5903	580.775	62.5903	577.238
62.8874	812.993	62.8874	800.375	62.8894	169.861	62.8894	170.5	62.8903	276.117	62.8903	230.678		62.8906	1179.68	62.8906	1094.53	62.8884	852.766	62.8884	670.223	62.8894	660.67	62.8894	659.848
63.1859	921.986	63.1859	909.872	63.1882	189.977	63.1882	192.2	63.1889	310.268	63.1889	268.549		63.1898	1342.37	63.1898	1246.38	63.1873	967.427	63.1873	762.644	63.1884	750.888	63.1884	752.923
63.4845	1039.16	63.4845	1028.66	63.4869	211.832	63.4869	214.972	63.4875	346.772	63.4875	310.349		63.489	1518.28	63.489	1411.42	63.4861	1092.44	63.4861	864.383	63.4873	848.737	63.4873	853.842
63.7841	1163.46	63.7841	1153.37	63.7866	236.09	63.7866	237.184	63.7869	387.38	63.7869	353.53		63.7887	1709.13	63.7887	1590.88	63.7856	1228.83	63.7856	975.038	63.787	954.155	63.787	961.159
64.0846	1306.28	64.0846	1294.42	64.0871	263.799	64.0871	264.119	64.0871	432.901	64.0871	403.294		64.0889	1927.47	64.0889	1792.81	64.0857	1380.95	64.0857	1093.87	64.0872	1072.8	64.0872	1082.42
64.3852	1462.9	64.3852	1449.12	64.3878	293.345	64.3878	293.557	64.3876	481.421	64.3876	457.033		64.3892	2162.45	64.3892	2013.56	64.386	1549.69	64.386	1228.35	64.3875	1201.8	64.3875	1212.99
64.686	1632.31	64.686	1616.07	64.6887	326.653	64.6887	325.054	64.6883	533.979	64.6883	513.8		64.6897	2416.21	64.6897	2254.74	64.6864	1733.14	64.6864	1373.18	64.688	1340.85	64.688	1356.93
64.9867	1813.2	64.9867	1796.56	64.9895	361.415	64.9895	361.065	64.989	591.59	64.989	577.295		64.9901	2698.62	64.9901	2515.73	64.9869	1932.81	64.9869	1527.53	64.9884	1491.57	64.9884	1510.67
65.2871	2012.62	65.2871	1991.21	65.29	400.936	65.29	397.192	65.2894	653.386	65.2894	643.573		65.2902	2995.96	65.2902	2792.79	65.2871	2145.19	65.2871	1699.82	65.2886	1651.42	65.2886	1676.93
65.5874	2219.13	65.5874	2195.76	65.5904	441.312	65.5904	437.301	65.5898	718.658	65.5898	715.891		65.5903	3309.22	65.5903	3093.01	65.5873	2372.78	65.5873	1867.3	65.5887	1822.86	65.5887	1852.02
65.8878	2444.23	65.8878	2414.04	65.891	488.652	65.891	480.126	65.8903	791.303	65.8903	794.294		65.8904	3654.92	65.8904	3415.23	65.8876	2619.09	65.8876	2054.6	65.8889	2007.81	65.8889	2041.46
66.1887	2673.52	66.1887	2641.03	66.1919	537.31	66.1919	523.692	66.1911	865.529	66.1911	874.722		66.191	4014.27	66.191	3749.74	66.1883	2875.52	66.1883	2255.81	66.1895	2199.55	66.1895	2237.73
66.4899	2921.11	66.4899	2883.13	66.4932	590.36	66.4932	571.876	66.4923	946.183	66.4923	961.016		66.4919	4398.85	66.4919	4110.56	66.4894	3150.99	66.4894	2463.64	66.4904	2405.36	66.4904	2448.85
66.7905	3178.48	66.7905	3138.17	66.7941	646.864	66.7941	622.968	66.793	1028.85	66.793	1053.77		66.7925	4797.83	66.7925	4487.48	66.7901	3441.62	66.7901	2679.6	66.7909	2617.4	66.7909	2670.56
67.0908	3435.73	67.0908	3393.55	67.0944	703.562	67.0944	674.245	67.0933	1111.97	67.0933	1145.38		67.0927	5209.11	67.0927	4873.15	67.0903	3739.69	67.0903	2899.8	67.0912	2834.32	67.0912	2896.19
67.3909	3688.47	67.3909	3645.69	67.3947	761.661	67.3947	724.436	67.3934	1196.77	67.3934	1236.76		67.3928	5630.47	67.3928	5263.28	67.3904	4039.58	67.3904	3118.98	67.3913	3048.1	67.3913	3123.46
67.691	3933.18	67.691	3891.92	67.6949	820.371	67.6949	775.185	67.6934	1278.97	67.6934	1326.57		67.693	6048.89	67.693	5646.38	67.6905	4334.57	67.6905	3327.65	67.6915	3258.27	67.6915	3347.92
67.9913	4170.4	67.9913	4126.78	67.9953	875.937	67.9953	820.59	67.9936	1355.28	67.9936	1412.89		67.9934	6442.73	67.9934	6016.76	67.9908	4619.3	67.9908	3543.58	67.9918	3458.31	67.9918	3565.29
68.2918	4372.85	68.2918	4336.82	68.2958	927.75	68.2958	865.473	68.294	1426.99	68.294	1490.46		68.294	6822.83	68.294	6371.69	68.2912	4894.79	68.2912	3724.31	68.2923	3643.53	68.2923	3765.87
68.5919	4553.76	68.5919	4522.09	68.5959	976.503	68.5959	904.024	68.594	1488.58	68.594	1558.22		68.5943	7173.52	68.5943	6687.12	68.5912	5144.62	68.5912	3908.15	68.5926	3801.94	68.5926	3945.04
68.8916	4665.51	68.8916	4646.59	68.8954	1009.02	68.8954	930.686	68.8933	1528.19	68.8933	1606.23		68.8943	7435.97	68.8943	6923.64	68.891	5333.8	68.891	4031.88	68.8925	3918.26	68.8925	4083.3
69.1911	4732.1	69.1911	4712.3	69.1945	1028.16	69.1945	945.077	69.1924	1547.75	69.1924	1631.53		69.1941	7631.89	69.1941	7094.81	69.1906	5471.64	69.1906	4094.1	69.1922	3989.38	69.1922	4174.22
69.4904	4722.25	69.4904	4706.71	69.4935	1032.32	69.4935	946.793	69.4914	1543.36	69.4914	1629.39		69.4936	7725.84	69.4936	7166.32	69.49	5531.07	69.49	4114.6	69.4918	4000.91	69.4918	4206.6
69.7897	4630.48	69.7897	4618.5	69.7924	1016.89	69.7924	935.173	69.7903	1512.12	69.7903	1598.13		69.7933	7703.18	69.7933	7127.31	69.7895	5500.84	69.7895	4080.98	69.7915	3949.63	69.7915	4171.92
70.089	4456.41	70.089	4451.4	70.0913	985.015	70.0913	905.167	70.0894	1457.79	70.0894	1540.29		70.093	7560.37	70.093	6969.85	70.0891	5385.18	70.0891	3965.79	70.0911	3823.79	70.0911	4068.91
70.3883	4198.83	70.3883	4199.76	70.3902	933.162	70.3902	861.809	70.3885	1372.98	70.3885	1455.31		70.3928	7279.48	70.3928	6682.12	70.3888	5170.39	70.3888	3773.02	70.3908	3632.66	70.3908	3892.82
70.6876	3860.65	70.6876	3868.2	70.6892	861.316	70.6892	801.583	70.6877	1264.51	70.6877	1343.14		70.6926	6865.49	70.6926	6276.93	70.6885	4863.61	70.6885	3513.26	70.6905	3373.99	70.6905	3639.53
70.987	3441.31	70.987	3461.23	70.9882	776.594	70.9882	729.657	70.9869	1135.69	70.9869	1202.71		70.9924	6326.82	70.9924	5751.46	70.9882	4466.82	70.9882	3160.57	70.9902	3051.6	70.9902	3320.08
71.2864	2976.31	71.2864	2993.15	71.2872	675.523	71.2872	644.722	71.2862	986.434	71.2862	1043.94		71.2921	5677.03	71.2921	5117.78	71.288	3978.81	71.288	2772.7	71.2899	2673.85	71.2899	2941.18
71.5867	2460.2	71.5867	2477.79	71.5872	564.339	71.5872	550.885	71.5865	825.575	71.5865	872.043		71.5927	4929.55	71.5927	4398.12	71.5886	3423.16	71.5886	2320.61	71.5903	2254.39	71.5903	2514.43
71.8879	1932.57	71.8879	1951.3	71.8883	451.128	71.8883	455.813	71.8877	662.651	71.8877	695.059		71.8937	4144.12	71.8937	3643.53	71.8895	2833.99	71.8895	1853.85	71.8911	1807.36	71.8911	2052.73
72.189	1383.15	72.189	1419.3	72.1895	338.146	72.1895	362.196	72.1892	501.947	72.1892	520.234		72.1944	3309.45	72.1944	2851.67	72.1903	2219.1	72.1903	1380.84	72.1919	1346.87	72.1919	1578.3
72.49	852.674	72.49	903.611	72.4908	226.271	72.4908	267.522	72.4906	346.462	72.4906	353.763		72.4952	2482.92	72.4952	2062.15	72.4911	1614.21	72.4911	892.829	72.4927	889.414	72.4927	1099.7
72.7909	355.567	72.7909	418.602	72.792	121.931	72.792	178.164	72.792	202.532	72.792	198.732		72.7958	1702.64	72.7958	1308.5	72.7917	1038.52	72.7917	399.081	72.7934	456.189	72.7934	637.548
73.0919	-99.2746	73.0919	-24.8644	73.0932	24.3285	73.0932	100.328	73.0933	69.1893	73.0933	56.3488		73.0964	960.014	73.0964	608.703	73.0924	490.408	73.0924	-30.5473	73.0941	54.9777	73.0941	199.771
73.3929	-499.05	73.3929	-410.7	73.3946	-61.7748	73.3946	28.3764	73.3947	-46.3083	73.3947	-71.697		73.3971	291.897	73.3971	-12.2412	73.3932	6.4485	73.3932	-416.515	73.3948	-309.341	73.3948	-203.115
73.6938	-836.12	73.6938	-737.776	73.6958	-135.735	73.6958	-32.3871	73.6959	-146.81	73.6959	-180.554		73.6976	-265.457	73.6976	-549.365	73.6938	-408.899	73.6938	-770.864	73.6954	-629.539	73.6954	-554.363
73.9948	-1109.6	73.9948	-998.102	73.997	-202.062	73.997	-83.914	73.9972	-230.357	73.9972	-267.897		73.9981	-720.014	73.9981	-988.116	73.9944	-747.145	73.9944	-1063.3	73.996	-904.496	73.996	-857.726
74.2957	-1327.42	74.2957	-1191.36	74.2982	-255.563	74.2982	-126.282	74.2983	-301.022	74.2983	-338.951		74.2986	-1064.45	74.2986	-1325.95	74.2948	-1006.8	74.2948	-1319.6	74.2965	-1129.15	74.2965	-1111.45
74.5959	-1484.72	74.5959	-1328.1	74.5988	-303.765	74.5988	-161.935	74.5989	-360.856	74.5989	-398.187		74.5986	-1286.83	74.5986	-1563.07	74.5948	-1193.54	74.5948	-1531.44	74.5966	-1310.08	74.5966	-1318.8
74.8959	-1587.68	74.8959	-1412.12	74.8991	-341.665	74.8991	-190.015	74.899	-410.706	74.899	-442.848		74.8985	-1424.09	74.8985	-1706.08	74.8948	-1303	74.8948	-1696.12	74.8966	-1444.47	74.8966	-1475.4
75.196	-1631.16	75.196	-1443.45	75.1993	-371.198	75.1993	-212.322	75.1991	-451.513	75.1991	-477.738		75.1985	-1456.16	75.1985	-1759.42	75.1949	-1347.81	75.1949	-1823.4	75.1967	-1537.35	75.1967	-1595.55
75.4962	-1629.49	75.4962	-1438.23	75.4996	-394.038	75.4996	-227.091	75.4993	-485.556	75.4993	-507.541		75.4987	-1411.03	75.4987	-1728.77	75.4951	-1344.11	75.4951	-1904.55	75.4967	-1594.99	75.4967	-1678.22
75.7966	-1581.2	75.7966	-1382.11	75.7999	-407.475	75.7999	-241.039	75.7996	-513.408	75.7996	-531.362		75.799	-1302.47	75.799	-1633.87	75.7955	-1285.17	75.7955	-1940.33	75.7969	-1634.92	75.7969	-1732.3
76.0968	-1494.77	76.0968	-1287.39	76.1001	-412.407	76.1001	-254.119	76.0997	-535.715	76.0997	-548.809		76.0993	-1116.62	76.0993	-1475.64	76.0956	-1165.63	76.0956	-1993.4	76.097	-1645.16	76.097	-1759.67
76.3969	-1370.03	76.3969	-1159.15	76.4002	-409.486	76.4002	-262.278	76.3997	-554.254	76.3997	-561.517		76.3993	-855.241	76.3993	-1259.56	76.3956	-1011.34	76.3956	-2021.24	76.3968	-1631.04	76.3968	-1765.16
76.697	-1219.59	76.697	-1001.85	76.7001	-398.528	76.7001	-269.507	76.6996	-568.069	76.6996	-573.15		76.6993	-565.057	76.6993	-1057.24	76.6955	-822.369	76.6955	-1992.99	76.6966	-1606.29	76.6966	-1759.71
76.9968	-1030.56	76.9968	-825.568	76.9998	-377.693	76.9998	-274.264	76.9993	-582.094	76.9993	-584.009		76.9991	-230.752	76.9991	-846.336	76.9952	-615.576	76.9952	-1958.43	76.9963	-1560.75	76.9963	-1744.48
77.2965	-826.091	77.2965	-628.903	77.2994	-349.945	77.2994	-279.758	77.2988	-588.404	77.2988	-588.821		77.2987	134.865	77.2987	-616.09	77.2949	-376.677	77.2949	-1903.09	77.2959	-1507.1	77.2959	-1714.83
77.5961	-596.971	77.5961	-417.882	77.5988	-310.58	77.5988	-281.842	77.5983	-591.939	77.5983	-592.229		77.5982	491.948	77.5982	-377.332	77.5945	-109.567	77.5945	-1829.74	77.5954	-1437.07	77.5954	-1677.26
77.8955	-349.68	77.8955	-184.7	77.8981	-264.96	77.8981	-283.731	77.8975	-588.201	77.8975	-593.952		77.8975	890.586	77.8975	-129.682	77.8939	168.817	77.8939	-1744.32	77.8947	-1358.27	77.8947	-1625.7
78.1949	-93.202	78.1949	62.7499	78.1973	-214.454	78.1973	-283.861	78.1968	-581.805	78.1968	-591.316		78.1968	1304.3	78.1968	123.583	78.1933	468.121	78.1933	-1638.68	78.194	-1269.91	78.194	-1556.64
78.4942	170.008	78.4942	320.972	78.4964	-155.969	78.4964	-285.025	78.4959	-572.301	78.4959	-584.939		78.496	1741.47	78.496	368.189	78.4925	785.19	78.4925	-1523.27	78.4933	-1172.26	78.4933	-1475.83
78.7934	425.915	78.7934	560.387	78.7955	-97.3134	78.7955	-280.721	78.7949	-557.716	78.7949	-573.218		78.7951	2166.13	78.7951	602.03	78.7917	1097.06	78.7917	-1414.45	78.7925	-1055.44	78.7925	-1382.53
79.0927	659.532	79.0927	775.913	79.0946	-39.4193	79.0946	-276.213	79.0939	-541.293	79.0939	-557.884		79.0941	2560.83	79.0941	805.88	79.0909	1384.01	79.0909	-1260.9	79.0919	-938.07	79.0919	-1282.47
79.392	870.044	79.392	955.46	79.3939	16.001	79.3939	-270.596	79.393	-519.861	79.393	-536.857		79.3933	2898.32	79.3933	958.594	79.3902	1649.05	79.3902	-1110.06	79.3913	-818.268	79.3913	-1167.59
79.6916	1051.38	79.6916	1102.19	79.6934	66.1539	79.6934	-262.5	79.6923	-495.649	79.6923	-508.002		79.6929	3186.24	79.6929	1171.08	79.6898	1870.4	79.6898	-982.699	79.691	-678.87	79.691	-1035.03
79.9914	1173.4	79.9914	1210.73	79.9931	111.397	79.9931	-251.289	79.9919	-462.617	79.9919	-472.753		79.9926	3417.32	79.9926	1378.82	79.9896	2061.1	79.9896	-827.532	79.9909	-534.952	79.9909	-889.547
80.2913	1258.6	80.2913	1267.61	80.2931	149.199	80.2931	-234.249	80.2918	-427.976	80.2918	-434.619		80.2926	3536.64	80.2926	1527.94	80.2895	2187.72	80.2895	-659.316	80.2909	-383.676	80.2909	-739.209
80.5915	1283.67	80.5915	1275.86	80.5931	175.836	80.5931	-214.713	80.5918	-385.541	80.5918	-387.197		80.5927	3594.42	80.5927	1617.7	80.5896	2240.79	80.5896	-501.34	80.591	-235.111	80.591	-579.548
80.8917	1258.72	80.8917	1220.89	80.8932	191.524	80.8932	-191.561	80.8918	-341.621	80.8918	-331.169		80.8929	3543.86	80.8929	1636.98	80.8898	2226.98	80.8898	-328.586	80.8912	-77.3408	80.8912	-421.311
81.1919	1180.38	81.1919	1098.93	81.1933	200.468	81.1933	-164.952	81.1918	-288.184	81.1918	-270.31		81.193	3370.59	81.193	1577.21	81.1898	2133.11	81.1898	-174.579	81.1913	79.0105	81.1913	-268.722
81.4921	1041.76	81.4921	920.502	81.4933	195	81.4933	-130.718	81.4918	-229.223	81.4918	-197.575		81.4931	3063.86	81.4931	1440.1	81.4898	1958.84	81.4898	-19.5071	81.4914	234.533	81.4914	-118.432
81.7924	853.431	81.7924	708.228	81.7934	181.282	81.7934	-95.1311	81.7919	-165.735	81.7919	-118.052		81.7933	2672.92	81.7933	1232.31	81.7899	1716.81	81.7899	142.418	81.7916	381.785	81.7916	35.2003
82.0927	648.082	82.0927	476.76	82.0936	161.245	82.0936	-52.3426	82.0921	-95.7853	82.0921	-35.939		82.0937	2228	82.0937	972.886	82.0902	1434.02	82.0902	279.002	82.0918	533.325	82.0918	183.562
82.3932	415.195	82.3932	245.661	82.3939	136.576	82.3939	-6.25335	82.3925	-21.8925	82.3925	53.6091		82.3942	1739.72	82.3942	691.351	82.3906	1118.64	82.3906	433.439	82.3921	686.762	82.3921	332.786
82.6936	184.093	82.6936	7.60713	82.6941	108.947	82.6941	43.0545	82.6928	56.7015	82.6928	143.957		82.6944	1228.44	82.6944	350.217	82.6908	793.935	82.6908	597.49	82.6923	840.606	82.6923	474.551
82.9938	-37.3456	82.9938	-219.742	82.9942	78.9872	82.9942	93.2045	82.9929	134.303	82.9929	234.004		82.9946	698.309	82.9946	-9.99929	82.991	464.603	82.991	746.385	82.9925	994.086	82.9925	614.666
83.2942	-232.325	83.2942	-425.484	83.2943	50.5836	83.2943	144.072	83.293	213.091	83.293	321.614		83.2948	230.332	83.2948	-352.741	83.2912	157.309	83.2912	877.387	83.2927	1143.18	83.2927	755.633
83.5945	-405.403	83.5945	-610.436	83.5945	21.976	83.5945	193.997	83.5932	286.356	83.5932	404.1		83.5951	-207.357	83.5951	-658.67	83.5914	-119.719	83.5914	1032.79	83.593	1297.51	83.593	898.179
83.8949	-562.612	83.8949	-763.727	83.8949	-3.10281	83.8949	241.247	83.8936	356.952	83.8936	473.713		83.8955	-595.15	83.8955	-934.471	83.8918	-361.282	83.8918	1157.68	83.8934	1441.74	83.8934	1037.59
84.1955	-682.726	84.1955	-871.877	84.1953	-27.6875	84.1953	284.704	84.1943	415.495	84.1943	535.646		84.1961	-897.853	84.1961	-1162.39	84.1923	-559.838	84.1923	1297.38	84.194	1578.86	84.194	1180.86
84.4961	-767.887	84.4961	-943.185	84.4959	-46.1565	84.4959	317.852	84.495	464.574	84.495	576.964		84.4967	-1119.67	84.4967	-1340.73	84.4929	-711.406	84.4929	1408.42	84.4946	1695.37	84.4946	1313.66
84.7965	-822.429	84.7965	-988.003	84.7963	-60.5063	84.7963	344.423	84.7955	500.42	84.7955	598.553		84.7971	-1298.43	84.7971	-1469.69	84.7933	-818.101	84.7933	1512.2	84.7951	1794.46	84.7951	1417.68
85.0969	-858.519	85.0969	-1014.59	85.0966	-74.7954	85.0966	359.79	85.0959	518.769	85.0959	607.218		85.0974	-1432.63	85.0974	-1554.69	85.0936	-895.564	85.0936	1607.64	85.0955	1851.79	85.0955	1505.4
85.3971	-875.192	85.3971	-1035.89	85.3968	-85.8493	85.3968	366.091	85.396	521.902	85.396	592.102		85.3974	-1530.28	85.3974	-1611.92	85.3936	-951.72	85.3936	1644.19	85.3957	1876.54	85.3957	1551.61
85.697	-882.397	85.697	-1034.39	85.6968	-95.3763	85.6968	361.404	85.696	510.329	85.696	560.624		85.6972	-1588.03	85.6972	-1646.03	85.6935	-979.708	85.6935	1637.54	85.6956	1845.3	85.6956	1559.99
85.9969	-867.68	85.9969	-1023.89	85.9967	-105.033	85.9967	345.63	85.9958	481.68	85.9958	515.05		85.9969	-1603.14	85.9969	-1660.18	85.9932	-996.562	85.9932	1601.57	85.9955	1763.31	85.9955	1526.78
86.2967	-865.072	86.2967	-1005.49	86.2966	-113.365	86.2966	319.453	86.2957	440.778	86.2957	457.751		86.2966	-1620.86	86.2966	-1657.97	86.293	-1005.23	86.293	1512.61	86.2953	1644.97	86.2953	1450.83
86.5964	-861.933	86.5964	-979.459	86.5963	-116.651	86.5963	286.902	86.5955	388.336	86.5955	387.894		86.5961	-1631.95	86.5961	-1662.36	86.5927	-1009.47	86.5927	1367.54	86.595	1477.5	86.595	1323.42
86.8959	-838.809	86.8959	-949.871	86.8958	-118.873	86.8958	248.475	86.8949	326.537	86.8949	315.314		86.8955	-1638.62	86.8955	-1647.44	86.8921	-1002.12	86.8921	1202.59	86.8946	1267.6	86.8946	1159.56
87.1952	-825.722	87.1952	-924.969	87.1952	-119.643	87.1952	204.777	87.1942	261.194	87.1942	238.19		87.1949	-1637.72	87.1949	-1627.05	87.1914	-993.999	87.1914	1011.95	87.194	1029.85	87.194	957.069
87.4946	-813.312	87.4946	-905.015	87.4946	-121.308	87.4946	162.499	87.4934	192.073	87.4934	166.285		87.4941	-1646.42	87.4941	-1602.34	87.4906	-990.386	87.4906	811.39	87.4933	783.862	87.4933	733.835
87.7941	-787.389	87.7941	-881.327	87.794	-122.468	87.794	121.126	87.7927	124.551	87.7927	99.5133		87.7936	-1613.43	87.7936	-1572.49	87.7899	-988.454	87.7899	586.358	87.7927	537.069	87.7927	509.595
88.0937	-766.543	88.0937	-855.617	88.0937	-118.039	88.0937	82.7244	88.0923	66.447	88.0923	38.9557		88.0932	-1595.37	88.0932	-1548.89	88.0895	-978.179	88.0895	340.267	88.0923	311.206	88.0923	286.778
88.3935	-738.728	88.3935	-823.724	88.3935	-114.663	88.3935	47.5599	88.3921	13.6948	88.3921	-10.7924		88.3932	-1565.03	88.3932	-1515.38	88.3893	-956.711	88.3893	138.787	88.392	94.0741	88.392	79.4787
88.6937	-713.428	88.6937	-798.502	88.6937	-109.714	88.6937	16.8477	88.6924	-33.2519	88.6924	-52.0525		88.6936	-1534.17	88.6936	-1478.94	88.6895	-947.328	88.6895	-42.1932	88.6922	-90.894	88.6922	-103.753
88.994	-700.419	88.994	-778.937	88.9941	-102.845	88.9941	-7.41159	88.9928	-67.6398	88.9928	-85.161		88.9942	-1513.74	88.9942	-1447.82	88.9898	-931.006	88.9898	-206.639	88.9924	-242.843	88.9924	-261.471
89.2942	-682.891	89.2942	-766.54	89.2944	-97.9343	89.2944	-24.3238	89.293	-97.0389	89.293	-112.304		89.2946	-1491.12	89.2946	-1417.17	89.2899	-911.575	89.2899	-323.283	89.2925	-369.621	89.2925	-394.783
89.5938	-659.14	89.5938	-752.494	89.5942	-94.2793	89.5942	-38.9085	89.5927	-117.8	89.5927	-127.993		89.5944	-1473.86	89.5944	-1389	89.5895	-891.751	89.5895	-425.635	89.5921	-467.015	89.5921	-492.054
89.8931	-645.831	89.8931	-741.987	89.8935	-91.8505	89.8935	-47.3307	89.8921	-131.312	89.8921	-137.49		89.8938	-1441.34	89.8938	-1362.3	89.8889	-882.45	89.8889	-491.606	89.8913	-523.224	89.8913	-558.668
90.1924	-632.518	90.1924	-730.274	90.1928	-88.3569	90.1928	-50.5082	90.1915	-140.108	90.1915	-142.71		90.1931	-1435.51	90.1931	-1342.96	90.1883	-871.024	90.1883	-555.637	90.1907	-558.273	90.1907	-598.648
90.4917	-611.571	90.4917	-712.975	90.4922	-83.8338	90.4922	-52.32	90.4909	-141.199	90.4909	-145.134		90.4925	-1409.69	90.4925	-1328.14	90.4877	-848.981	90.4877	-602.983	90.49	-573.565	90.49	-617.947
90.7909	-607.71	90.7909	-700.129	90.7914	-79.0435	90.7914	-52.7306	90.7903	-139.169	90.7903	-140.702		90.7918	-1408.63	90.7918	-1321.46	90.7871	-822.143	90.7871	-609.765	90.7893	-589.229	90.7893	-625.111
91.09	-590.614	91.09	-690.929	91.0905	-76.8083	91.0905	-50.9373	91.0894	-136.404	91.0894	-138.357		91.0909	-1399.66	91.0909	-1321.12	91.0862	-800.639	91.0862	-595.183	91.0886	-596.952	91.0886	-624.562
91.3889	-578.078	91.3889	-678.496	91.3895	-75.4631	91.3895	-49.0107	91.3883	-131.66	91.3883	-134.081		91.3898	-1376.86	91.3898	-1321.57	91.3852	-778.537	91.3852	-592.663	91.3877	-594.641	91.3877	-611.941
91.6875	-573.176	91.6875	-669.961	91.6883	-72.609	91.6883	-43.4945	91.6871	-126.719	91.6871	-130.593		91.6885	-1363.16	91.6885	-1317.29	91.6842	-757.107	91.6842	-566.634	91.6866	-587.082	91.6866	-601.656
91.9862	-561.022	91.9862	-656.585	91.9869	-69.8616	91.9869	-36.8631	91.9858	-124.329	91.9858	-126.659		91.9872	-1341.34	91.9872	-1325.01	91.9831	-737.732	91.9831	-564.579	91.9855	-573.276	91.9855	-588.166
92.2851	-549.656	92.2851	-639.229	92.2857	-66.1096	92.2857	-33.889	92.2846	-118.463	92.2846	-119.926		92.2861	-1318.76	92.2861	-1347.05	92.2822	-727.904	92.2822	-551.93	92.2846	-564.223	92.2846	-570.766
92.5851	-531.244	92.5851	-627.46	92.5857	-62.9248	92.5857	-29.5605	92.5847	-110.132	92.5847	-115.784		92.5861	-1283.68	92.5861	-1355.9	92.5824	-713.132	92.5824	-524.173	92.5847	-547.621	92.5847	-552.645
92.8862	-517.567	92.8862	-616.745	92.8867	-57.1995	92.8867	-26.9373	92.8857	-103.504	92.8857	-111.047		92.8873	-1275.11	92.8873	-1380.06	92.8834	-695.175	92.8834	-500.726	92.8858	-538.857	92.8858	-537.459
93.1872	-499.913	93.1872	-614.469	93.1877	-54.978	93.1877	-24.4377	93.1868	-95.3084	93.1868	-105.173		93.1883	-1249.39	93.1883	-1405.67	93.1844	-677.757	93.1844	-476.876	93.1867	-524.208	93.1867	-525.312
93.4882	-500.016	93.4882	-618.817	93.4887	-50.9116	93.4887	-21.9149	93.4879	-88.945	93.4879	-101.464		93.4894	-1235.05	93.4894	-1401.71	93.4855	-674.357	93.4855	-450.541	93.4876	-519.142	93.4876	-513.321
93.7894	-484.118	93.7894	-634.109	93.7899	-50.2101	93.7899	-18.8188	93.7891	-83.111	93.7891	-100.911		93.7906	-1222.36	93.7906	-1381.23	93.7867	-673.298	93.7867	-433.001	93.7885	-500.383	93.7885	-500.808
94.0906	-482.204	94.0906	-649.066	94.0912	-47.6408	94.0912	-16.9791	94.0904	-79.8739	94.0904	-98.0575		94.0919	-1210.84	94.0919	-1317.92	94.088	-673.566	94.088	-410.361	94.0896	-484.313	94.0896	-488.708
94.3919	-483.08	94.3919	-671.3	94.3925	-42.8491	94.3925	-13.5504	94.3917	-76.2448	94.3917	-95.4242		94.3932	-1191.37	94.3932	-1285.1	94.3892	-683.726	94.3892	-395.212	94.3905	-465.317	94.3905	-481.676
94.693	-472.938	94.693	-681.444	94.6935	-40.5477	94.6935	-14.4906	94.6927	-73.921	94.6927	-90.2288		94.6943	-1165.99	94.6943	-1250.47	94.6902	-681.527	94.6902	-413.544	94.6914	-449.532	94.6914	-468.403
94.9938	-461.261	94.9938	-695.256	94.9943	-38.9852	94.9943	-17.2083	94.9934	-66.6169	94.9934	-85.3547		94.995	-1152.19	94.995	-1205.35	94.9908	-675.886	94.9908	-394.822	94.9921	-438.548	94.9921	-458.259
95.2946	-444.75	95.2946	-712.962	95.295	-35.9502	95.295	-16.6913	95.2941	-62.7493	95.2941	-81.6503		95.2957	-1125.88	95.2957	-1150.08	95.2914	-660.367	95.2914	-384.914	95.2927	-418.545	95.2927	-449.563
95.5947	-432.474	95.5947	-731.537	95.595	-31.3639	95.595	-14.6613	95.5941	-60.922	95.5941	-77.3232		95.5957	-1115.73	95.5957	-1113.64	95.5915	-650.88	95.5915	-380.415	95.5927	-405.249	95.5927	-442.102
95.8942	-412.566	95.8942	-740.08	95.8944	-30.7903	95.8944	-12.8419	95.8935	-59.2817	95.8935	-74.3253		95.8951	-1082.17	95.8951	-1067.03	95.891	-644.369	95.891	-382.894	95.8922	-398.367	95.8922	-435.944
96.1934	-397.406	96.1934	-736.774	96.1935	-25.8884	96.1935	-11.5652	96.1925	-59.989	96.1925	-73.2694		96.1942	-1056.25	96.1942	-991.824	96.1902	-645.021	96.1902	-363.323	96.1914	-393.756	96.1914	-426.073
